# Supplementary material for: Detailed Soluble Proteome Analyses of a Dairy-Isolated Enterococcus faecalis: A Possible Approach to Assess Food Safety and Potential Probiotic Value
Source: Front Nutr. 2019 May 17;6:71. doi: 10.3389/fnut.2019.00071 (PMC6533484; doi:10.3389/fnut.2019.00071)
Supplement: Table S2 — The table includes the cytosolic proteins identified in at least two of the three biological replicates of E. faecalis D27 and E. faecalis UW3114 and the proteins found only in one E. faecalis strain and absent (off) in the other strain. The fold-change is given by the ratio between the average of the relative abundance (fmol/ng) in E. faecalis D27 and the average of the relative abundance (fmol/ng) in E. faecalis UW3114. Accession, protein name, description, localization (obtained by pSortb), main role and subrole are reported to give information on the protein function. For each protein, the abundance (fmol/ng) for all the biological replicates, as well as the average of the abundance are reported for both E. faecalis D27 and E. faecalis UW3114. The Repcount refers to the number of technical replicates in which the protein was identified. [file Table_2.XLSX]

## Sheet: Table S2
b Protein abundance for each of the three technical replicates (D27_1, D27_2 and D27_3) of E. faecalis D27
c Average of the protein amount for the three techinical replicates of E. faecalis D27
d Number of technical replicates of E. faecalis D27 in which the protein was identified and quantified
e Protein abundance for each of the three technical replicates (UW3114_1, UW3114_2 and UW3114_3) of E. faecalis UW3114
f Average of the protein amount for the three techinical replicates of E. faecalis UW3114
g Number of technical replicates of E. faecalis UW3114 in which the protein was identified and quantified
						QUANTITATIVE RESULTS
PROTEIN DESCRIPTION						Fold-change a D27/UW3114	fmol/ng b			Average fmol/ng D27 c	Repcount D27 d	fmol/ng e			Average fmol/ng UW3114 f	Repcount UW3114 g
Accession	Protein	Descriprion	Localization (pSort)	main role	subrole		D27_1	D27_2	D27_3			fmol/ng UW3114_1	fmol/ng UW3114_2	fmol/ng UW3114_3
AAM75243.1_36	EF0037	Ketopantoate reductase, putative		Biosynthesis of cofactors, prosthetic groups, and carriers	Pantothenate and coenzyme A	0.0952932	0.00115652	0.00265911	0.00134529	0.00172031	3	0.0143525	0.0154456	0.0243603	0.0180528	3
OG1RF_10978_978	Mdh	malate dehydrogenase (oxaloacetate-decarboxylating) (NADP(+))	Unknown	metabolism	Energy production and conversion	0.109036	0.00724658	0.0119791	0.00469572	0.0079738	3	0.0798663	0.0533885	0.0861351	0.0731299	3
OG1RF_12510_2510	Ndh3	NADH dehydrogenase	Cytoplasmic Membrane	metabolism	Energy production and conversion	0.143572	0.00222496	0.00337593	0.00229506	0.00263198	3	0.0174076	0.0136751	0.0239136	0.0183321	3
OG1RF_11979_1979	OG1RF_11979	FMN-dependent NADH-azoreductase	Cytoplasmic	metabolism	Lipid transport and metabolism	0.161095	0.0148897	0.00259939	0.012517	0.0100021	3	0.0400577	0.0973986	0.0488072	0.0620878	3
OG1RF_10069_69	OG1RF_10069	hypothetical protein OG1RF_10069	Cytoplasmic Membrane	poorly characterized	Function unknown	0.176252	0.00827757	0.00113947	0.00842563	0.00594756	3	0.0311157	0.0349048	0.0352133	0.0337446	3
OG1RF_11757_1757	YpdD	cell wall surface anchor family antigen	Cytoplasmic	Cell envelope	Biosynthesis and degradation of surface polysaccharides and lipopolysaccharides	0.203144	0.00266739	0.00158685	0.00299243	0.00241556	3	0.0270995	0.00437138	0.00420164	0.0118908	3
OG1RF_10247_247	GloA	lactoylglutathione lyase	Cytoplasmic	metabolism	Amino acid transport and metabolism	0.21285	0.00461936		0.00719548	0.00590742	2	0.0339912	0.029142	0.0201284	0.0277539	3
OG1RF_11592_1592	GlpK	glycerol kinase	Cytoplasmic	Energy metabolism	Other	0.214979	0.0517526	0.0137493	0.0549948	0.0401656	3	0.201562	0.224737	0.134205	0.186834	3
OG1RF_12351_2351	OG1RF_12351	ferric (Fe+3) ABC superfamily ATP binding cassette transporter, binding protein	Cytoplasmic Membrane	metabolism	Inorganic ion transport and metabolism	0.239435	0.00189469	0.0023691	0.00271667	0.00232682	3	0.0121004	0.0063882	0.0106653	0.00971796	3
OG1RF_12446_2446	DapE	succinyl-diaminopimelate desuccinylase	Unknown	Amino acid biosynthesis	Aspartate family	0.249917	0.00993106	0.00791898	0.00236966	0.0067399	3	0.0272632	0.0312459	0.0223965	0.0269685	3
OG1RF_11332_1332	OG1RF_11332	CoA-binding domain protein	Cytoplasmic	poorly characterized	General function prediction only	0.259145	0.00729818	0.0062978	0.00604897	0.00654832	3	0.025129	0.0236547	0.027023	0.0252689	3
OG1RF_11660_1660	Ndh2	NADH dehydrogenase	Cytoplasmic Membrane	metabolism	Energy production and conversion	0.272698	0.0252278	0.00712788	0.0230036	0.0184531	3	0.078009	0.059507	0.0654897	0.0676686	3
OG1RF_12547_2547	MycA	myosin-cross-reactive antigen	Unknown	poorly characterized	Function unknown	0.275306	0.00511055	0.00533123	0.00405149	0.00483109	3	0.0100615	0.0167973	0.0257854	0.0175481	3
OG1RF_11379_1379	OG1RF_11379	short chain dehydrogenase	Cytoplasmic	metabolism	Lipid transport and metabolism	0.280995	0.00329392	0.00572181	0.00404185	0.00435253	3	0.0185871	0.016934	0.0109481	0.0154897	3
OG1RF_12209_2209	OG1RF_12209	hypothetical protein OG1RF_12209	Cytoplasmic	poorly characterized	Function unknown	0.299463	0.0140095	0.00687451	0.0186043	0.0131628	3	0.0664501	0.0346015	0.0308119	0.0439545	3
OG1RF_11731_1731	RfbD	dTDP-4-dehydrorhamnose reductase	Cytoplasmic	Cell envelope	Biosynthesis and degradation of surface polysaccharides and lipopolysaccharides	0.306486	0.00477941	0.00454608	0.00767945	0.00566831	3	0.0219164	0.0202233	0.0133439	0.0184945	3
OG1RF_10071_71	OG1RF_10071	stress response regulator Gls24	Cytoplasmic	poorly characterized	Function unknown	0.312346	0.0509998	0.0384104	0.0618375	0.0504159	3	0.177492	0.154671	0.152069	0.16141	3
OG1RF_11246_1246	Gap	glyceraldehyde-3-phosphate dehydrogenase	Cytoplasmic	Energy metabolism	Glycolysis/gluconeogenesis	0.314258	0.0325778	0.007952	0.0213083	0.0206127	3	0.0933515	0.0697957	0.0336283	0.0655918	3
OG1RF_11591_1591	GlpO	glycerol-3-phosphate oxidasehttp://www.ncbi.nlm.nih.gov/protein/327535444	Cytoplasmic	metabolism	Energy production and conversion	0.315085	0.0218997	0.0248159	0.0256894	0.024135	3	0.0909003	0.0861054	0.0527894	0.0765984	3
OG1RF_12015_2015	OG1RF_12015	hypothetical protein OG1RF_12015	Unknown	poorly characterized	Function unknown	0.336635	0.00414478	0.00112103	0.00392941	0.00306507	3	0.00785341	0.00970543	0.00975631	0.00910505	3
OG1RF_10386_386	OG1RF_10386	nitroreductase	Unknown	poorly characterized	General function prediction only	0.345333	0.0042416		0.00910775	0.00667467	2	0.0138767	0.0258418	0.0182662	0.0193282	3
OG1RF_10068_68	FabG	3-oxoacyl-[acyl-carrier-protein] reductase	Cytoplasmic	Fatty acid and phospholipid metabolism	Biosynthesis	0.366227	0.00986085	0.003971	0.00681663	0.00688283	3	0.01303	0.0240544	0.0192972	0.0187939	3
OG1RF_10436_436	OG1RF_10436	GNAT family acetyltransferase	Cytoplasmic	poorly characterized	General function prediction only	0.367774	0.00116107		0.00134531	0.00125319	2	0.00602325	0.00196363	0.00223562	0.0034075	3
OG1RF_12106_2106	OG1RF_12106	metallo-beta-lactamase	Cytoplasmic	poorly characterized	General function prediction only	0.391542	0.00268322	0.00185242	0.00323071	0.00258878	3	0.00553582	0.00756966	0.00672982	0.00661177	3
OG1RF_12357_2357	GshAB	glutathione synthase	Cytoplasmic	Biosynthesis of cofactors, prosthetic groups, and carriers	Glutathione and analogs	0.391651	0.00310706	0.00375769	0.00548933	0.00411803	3	0.00692024	0.0149939	0.00962949	0.0105145	3
OG1RF_10162_162	RplX	50S ribosomal protein L24	Cytoplasmic	Protein synthesis	Ribosomal proteins: synthesis and modification	0.407869	0.0286747	0.0422395	0.0495991	0.0401711	3	0.104725	0.10719	0.0835553	0.0984904	3
OG1RF_11318_1318	MalL2	oligo-1,6-glucosidase	Cytoplasmic	metabolism	Carbohydrate transport and metabolism	0.416814	0.0159377	0.0106833	0.0173183	0.0146465	3	0.0447385	0.0360877	0.0245909	0.035139	3
OG1RF_10228_228	PyrDA	dihydroorotate oxidase	Cytoplasmic	metabolism	Nucleotide transport and metabolism	0.42106	0.0076357	0.00330038	0.00663932	0.00585847	3	0.0142626	0.016852	0.0106263	0.0139136	3
OG1RF_11505_1505	OG1RF_11505	hypothetical protein OG1RF_11505	Extracellular	poorly characterized	Function unknown	0.421953	0.00097193		0.00133124	0.00115158	2	0.00261496	0.00291365	0.00265892	0.00272918	3
OG1RF_10016_16	OG1RF_10016	ABC superfamily ATP binding cassette transporter, ABC protein	Cytoplasmic	poorly characterized	General function prediction only	0.434401	0.0198203	0.00797961	0.015961	0.014587	3	0.0305767	0.0378207	0.032341	0.0335795	3
OG1RF_12439_2439	RecA	recombination protein A	Cytoplasmic	DNA metabolism	DNA replication, recombination, and repair	0.452519	0.023254	0.00765485	0.0416732	0.024194	3	0.0554324	0.0506947	0.0542687	0.0534652	3
OG1RF_10072_72	OG1RF_10072	stress response regulator Gls24	Cytoplasmic	poorly characterized	Function unknown	0.453849	0.231231	0.114836	0.148185	0.16475	3	0.280616	0.381415	0.426992	0.363008	3
OG1RF_10643_643	RplT	50S ribosomal protein L20	Cytoplasmic	Protein synthesis	Ribosomal proteins: synthesis and modification	0.462762	0.0739314	0.00978148	0.0477765	0.0438298	3	0.0945798	0.0835319	0.106029	0.0947135	3
OG1RF_11795_1795	PurB	adenylosuccinate lyase	Cytoplasmic	Purines, pyrimidines, nucleosides, and nucleotides	Purine ribonucleotide biosynthesis	0.464504	0.011156	0.00245426	0.0109901	0.00820014	3	0.01521	0.0196933	0.0180573	0.0176535	3
OG1RF_10209_209	FtsH	cell division protein FtsH	Cytoplasmic Membrane	Cellular processes	Cell division	0.468826	0.0133222	0.00721566	0.0122141	0.0109173	3	0.0201374	0.0239245	0.0257978	0.0232865	3
OG1RF_11965_1965	OG1RF_11965	glutamine amidotransferase domain protein	Unknown	poorly characterized	General function prediction only	0.468974	0.00263914		0.00373098	0.00318506	2	0.00556223	0.00713006	0.00768237	0.00679156	3
OG1RF_10135_135	OG1RF_10135	purine nucleoside phosphorylase	Cytoplasmic	Purines, pyrimidines, nucleosides, and nucleotides	Salvage of nucleosides and nucleotides	0.477428	0.0131252	0.00724117	0.0138983	0.0114216	3	0.0282834	0.0230297	0.0204561	0.0239231	3
OG1RF_12305_2305	HtrA	serine protease HtrA	Unknown	cellular processes and signaling	Posttranslational modification, protein turnover, chaperones	0.480221	0.00561184	0.00471261	0.00572461	0.00534969	3	0.0123585	0.0117456	0.0093161	0.0111401	3
OG1RF_11156_1156	OG1RF_11156	hypothetical protein OG1RF_11156	Unknown	poorly characterized	Function unknown	0.484846	0.0205947	0.045217	0.0288377	0.0315498	3	0.0799955	0.0676307	0.0475892	0.0650718	3
OG1RF_12391_2391	Gmk2	guanylate kinase	Cytoplasmic	Purines, pyrimidines, nucleosides, and nucleotides	Nucleotide and nucleoside interconversions	0.485693	0.00190494	0.00186356	0.00323839	0.00233563	3	0.0052247	0.0033464	0.00585549	0.00480886	3
OG1RF_10928_928	DivIVA2	cell division initiation protein DivIVA	Unknown	Cellular processes	Cell division	0.495527	0.0259535	0.0265224	0.0236747	0.0253835	3	0.0571917	0.0466396	0.0498445	0.0512253	3
OG1RF_11743_1743	OG1RF_11743	TetR family transcriptional regulator	Cytoplasmic	information storage and processing	Transcription	0.502504	0.00941441	0.00551169	0.0176038	0.0108433	3	0.0221992	0.0204011	0.0221353	0.0215785	3
OG1RF_12080_2080	RplL2	ribosomal protein L7/L12	Cytoplasmic	Protein synthesis	Ribosomal proteins: synthesis and modification	0.503874	0.0563355	0.0764798	0.0611972	0.0646708	3	0.13741	0.120167	0.127464	0.128347	3
OG1RF_10975_975	OG1RF_10975	crossover junction endodeoxyribonuclease	Unknown	poorly characterized	General	0.523654	0.00202979		0.00183762	0.0019337	2	0.00344398	0.00380707	0.0038271	0.00369272	3
OG1RF_11194_1194	UvrC	excision endonuclease subunit UvrC	Cytoplasmic	DNA metabolism	DNA replication, recombination, and repair	0.535153	0.00253438	0.00258429	0.00249786	0.00253884	3	0.00300532	0.00332344	0.00790366	0.00474414	3
OG1RF_12232_2232	Tpx	thiol peroxidase	Cytoplasmic	cellular processes and signaling	Posttranslational modification, protein turnover, chaperones	0.537927	0.0242481	0.0261126	0.0358309	0.0287306	3	0.0523037	0.0692939	0.0386317	0.0534098	3
OG1RF_11080_1080	DnaJ	chaperone DnaJ	Cytoplasmic	Protein fate	Protein folding and stabilization	0.539291	0.00868936	0.00621625	0.00637867	0.00709476	3	0.0124849	0.0111241	0.015858	0.0131557	3
OG1RF_10915_915	DkgB	2,5-diketo-D-gluconate reductase	Cytoplasmic	poorly characterized	General function prediction only	0.540806	0.0267589	0.00887803	0.0306762	0.0221044	3	0.0372092	0.0435442	0.0418655	0.040873	3
OG1RF_10467_467	OG1RF_10467	putative thioredoxin	Cytoplasmic	cellular processes and signaling	Posttranslational modification, protein turnover, chaperones	0.542765	0.000606272		0.000687728	0.000647	2		0.00124295	0.00114114	0.00119204	2
OG1RF_10149_149	Cfa	cyclopropane-fatty-acyl-phospholipid synthase	Cytoplasmic	Cell envelope	Biosynthesis and degradation of surface polysaccharides and lipopolysaccharides	0.547575	0.0255604	0.00592617	0.0261749	0.0192205	3	0.0347885	0.0425234	0.0279915	0.0351011	3
OG1RF_10504_504	OG1RF_10504	thioredoxin superfamily protein	Cytoplasmic	cellular processes and signaling	Posttranslational modification, protein turnover, chaperones	0.550938	0.0253947	0.00938266	0.0266333	0.0204702	3	0.0388238	0.0397399	0.0329021	0.0371553	3
OG1RF_12519_2519	Gor	glutathione-disulfide reductase	Cytoplasmic	Energy metabolism	Electron transport	0.566312	0.0119477	0.00804731	0.0116215	0.0105389	3	0.0178334	0.0256198	0.0123757	0.0186096	3
OG1RF_10140_140	Adh3	putative alcohol dehydrogenase (NADP(+))	Cytoplasmic	metabolism	Energy production and conversion	0.572963	0.055269	0.0184567	0.0581411	0.0439556	3	0.0804675	0.0809537	0.0687279	0.0767164	3
OG1RF_11303_1303	SrpG2	cysteine synthase	Cytoplasmic	Amino acid biosynthesis	Serine family	0.581488	0.0410501	0.018945	0.0347182	0.0315711	3	0.0550162	0.0609908	0.0468742	0.0542937	3
OG1RF_10397_397	GloA2	lactoylglutathione lyase	Cytoplasmic	metabolism	Amino acid transport and metabolism	0.587105	0.0100887	0.00795857	0.00945414	0.00916714	3	0.0169365	0.0147042	0.0152018	0.0156141	3
OG1RF_11987_1987	AtpG	ATP synthase F1 sector gamma subunit	Cytoplasmic	Energy metabolism	ATP-proton motive force interconversion	0.587171	0.00618153	0.00541235	0.00510323	0.0055657	3	0.011966	0.00887074	0.00759984	0.00947885	3
OG1RF_10574_574	Ddl	D-alanine--D-alanine ligase	Cytoplasmic	Cell envelope	Biosynthesis and degradation of murein sacculus and peptidoglycan	0.597118	0.0214781	0.00811218	0.025741	0.0184438	3	0.03134	0.0317336	0.0295902	0.030888	3
OG1RF_10423_423	PrsA	peptidyl-prolyl cis-trans isomerase	Cytoplasmic Membrane	cellular processes and signaling	Posttranslational modification, protein turnover, chaperones	0.601745	0.0124965	0.0122302	0.0140717	0.0129328	3	0.0187375	0.0216509	0.0240881	0.0214922	3
OG1RF_12366_2366	OG1RF_12366	peptide ABC superfamily ATP binding cassette transporter, binding protein	Unknown	metabolism	Amino acid transport and metabolism	0.606097	0.0123032	0.00781798	0.0103521	0.0101578	3	0.0160709	0.0181619	0.0160451	0.0167593	3
AAM75246.1_39	EF0040	Choloylglycine hydrolase		Cell envelope	Biosynthesis and degradation of surface polysaccharides and lipopolysaccharides	0.619662	0.0272079	0.0141636	0.0266545	0.0226753	3	0.0375694	0.0427585	0.0294512	0.0365931	3
OG1RF_10396_396	OG1RF_10396	hypothetical protein OG1RF_10396	Cytoplasmic	poorly characterized	Function unknown	0.620827	0.0433069	0.100854	0.0904846	0.0782153	3	0.114915	0.141809	0.121233	0.125986	3
OG1RF_11793_1793	ClpB	chaperone protein ClpB	Cytoplasmic	Protein fate	Protein folding and stabilization	0.623218	0.0263987	0.0260421	0.0226706	0.0250371	3	0.0418735	0.0451218	0.0335265	0.0401739	3
OG1RF_10290_290	OG1RF_10290	nitroreductase	Cytoplasmic	metabolism	Energy production and conversion	0.632485	0.00251447		0.0025033	0.00250888	2	0.00278616	0.00644756	0.00266641	0.00396671	3
OG1RF_11855_1855	OG1RF_11855	putative pyrroline-5-carboxylate reductase	Cytoplasmic	Amino acid biosynthesis	Glutamate family	0.639097	0.00569356	0.00407127	0.00617767	0.00531417	3	0.00718928	0.00812213	0.00963392	0.00831511	3
OG1RF_10124_124	OG1RF_10124	ABC superfamily ATP binding cassette transporter, binding protein	Unknown	poorly characterized	General function prediction only	0.650065	0.0100555	0.00636991	0.00891659	0.00844733	3	0.0130725	0.0145363	0.011375	0.0129946	3
OG1RF_11296_1296	FolA	dihydrofolate reductase	Cytoplasmic	Biosynthesis of cofactors, prosthetic groups, and carriers	Folic acid	0.650616	0.00168262		0.00096149	0.00132205	2	0.00180986	0.00248784	0.0017983	0.002032	3
OG1RF_11986_1986	AtpD2	ATP synthase F1 sector beta subunit	Cytoplasmic Membrane	Energy metabolism	ATP-proton motive force interconversion	0.653862	0.0288392	0.0325951	0.0364701	0.0326348	3	0.0517741	0.0505551	0.0474032	0.0499108	3
OG1RF_12203_2203	OG1RF_12203	ABC superfamily ATP binding cassette transporter, substrate-binding protein	Unknown	metabolism	Carbohydrate transport and metabolism	0.656783	0.0230778	0.0262587	0.0287509	0.0260291	3	0.0396976	0.0436145	0.0355817	0.0396312	3
OG1RF_10606_606	PolA	DNA-directed DNA polymerase I	Cytoplasmic	DNA metabolism	DNA replication, recombination, and repair	0.660706	0.0110911	0.00752151	0.0111213	0.00991133	3	0.0128406	0.0179425	0.0142202	0.0150011	3
OG1RF_10125_125	OG1RF_10125	ABC superfamily ATP binding cassette transporter, binding protein	Unknown	poorly characterized	General function prediction only	0.667436	0.0420638	0.0336159	0.0347366	0.0368054	3	0.0694528	0.0520064	0.0439744	0.0551445	3
OG1RF_11151_1151	OG1RF_11151	hydroxymethylglutaryl-CoA synthase	Cytoplasmic	metabolism	Lipid transport and metabolism	0.669598	0.00435626	0.00442026	0.0054847	0.00475374	3	0.00629215	0.00595143	0.00905462	0.0070994	3
OG1RF_11564_1564	RplS	50S ribosomal protein L19	Cytoplasmic	Protein synthesis	Ribosomal proteins: synthesis and modification	0.677852	0.120306	0.0887784	0.13137	0.113485	3	0.181506	0.150806	0.169942	0.167418	3
OG1RF_10170_170	RplO	50S ribosomal protein L15	Unknown	Protein synthesis	Ribosomal proteins: synthesis and modification	0.687604	0.188824	0.0728742	0.207129	0.156276	3	0.254715	0.214755	0.212357	0.227276	3
OG1RF_10894_894	PheT	phenylalanyl-tRNA synthetase beta subunit	Cytoplasmic	Protein synthesis	tRNA aminoacylation	0.687795	0.0158103	0.0139282	0.0154569	0.0150651	3	0.0187988	0.0279426	0.0189692	0.0219035	3
OG1RF_10212_212	LysS	lysine--tRNA ligase	Cytoplasmic	Protein synthesis	tRNA aminoacylation	0.690916	0.0429574	0.0232816	0.0376856	0.0346415	3	0.0501005	0.0478905	0.0524247	0.0501386	3
OG1RF_10443_443	OG1RF_10443	hypothetical protein OG1RF_10443	Unknown	poorly characterized	Function unknown	0.728919	0.0161001	0.00900835	0.0148797	0.0133294	3	0.0199822	0.0169983	0.0178791	0.0182865	3
OG1RF_10948_948	RpmE	50S ribosomal protein L31	Cytoplasmic	Protein synthesis	Ribosomal proteins: synthesis and modification	0.821792	0.218881	0.216342	0.22738	0.220868	3	0.299032	0.237609	0.26965	0.268764	3
OG1RF_11300_1300	Tkt	transketolase	Cytoplasmic	Energy metabolism	Pentose phosphate pathway	0.842628	0.0979927	0.0772409	0.102646	0.0926265	3	0.109399	0.113019	0.107359	0.109926	3
OG1RF_11832_1832	Tsf	elongation factor EF1B	Cytoplasmic	Protein synthesis	Translation factors	0.933089	0.244921	0.238655	0.242494	0.242023	3	0.277012	0.255271	0.245852	0.259379	3
OG1RF_11465_1465	PhoU	phosphate transport system regulatory protein PhoU	Cytoplasmic	Regulatory functions	Other	1.05095	0.0162666	0.00865881	0.0160969	0.0136741	3	0.0118691	0.0136069	0.0135576	0.0130112	3
OG1RF_12567_2567	CitC	citrate [pro-3S]-lyase] ligase	Cytoplasmic	Energy metabolism	Fermentation	1.0874	0.00114921		0.00151682	0.00133301	2		0.00070743	0.00174431	0.00122587	2
OG1RF_11625_1625	Pgk	phosphoglycerate kinase	Cytoplasmic	Energy metabolism	Glycolysis/gluconeogenesis	1.1393	0.252401	0.220096	0.223877	0.232124	3	0.19469	0.197331	0.219205	0.203742	3
OG1RF_12492_2492	RpoC	DNA-directed RNA polymerase subunit beta prime	Cytoplasmic	Transcription	DNA-dependent RNA polymerase	1.1734	0.0767793	0.0730393	0.0729009	0.0742398	3	0.0633798	0.0669475	0.0594795	0.0632689	3
OG1RF_12387_2387	Fmt	methionyl-tRNA formyltransferase	Cytoplasmic	Protein synthesis	tRNA aminoacylation	1.19367	0.0081168	0.0100786	0.0090856	0.00909365	3	0.00749465	0.00782563	0.00753443	0.00761824	3
OG1RF_10456_456	LacR	lactose PTS family porter repressor	Unknown	information storage and processing	Transcription	1.21641	0.00779754	0.00703617	0.00585656	0.00689676	3	0.00574155	0.00557967	0.00568812	0.00566978	3
OG1RF_11856_1856	PgcA	bifunctional phosphoglucomutase/phosphomannomutase	Cytoplasmic	metabolism	Carbohydrate transport and metabolism	1.21764	0.046772	0.0522898	0.0555523	0.051538	3	0.0462812	0.041713	0.0389847	0.0423263	3
OG1RF_12214_2214	GreA	transcription elongation factor GreA	Cytoplasmic	Transcription	Transcription factors	1.22122	0.0948643	0.103255	0.0888019	0.0956403	3	0.0764314	0.0789196	0.0795957	0.0783156	3
OG1RF_11932_1932	GlyA	serine hydroxymethyltransferahttp://www.ncbi.nlm.nih.gov/protein/327535785se	Cytoplasmic	metabolism	Amino acid transport and metabolism	1.22342	0.0330062	0.0304128	0.0326726	0.0320305	3	0.0271056	0.0220179	0.02942	0.0261812	3
OG1RF_12048_2048	TrpS2	tryptophan--tRNA ligase	Cytoplasmic	Protein synthesis	tRNA aminoacylation	1.28487	0.00290771		0.00245954	0.00268363	2	0.00239768	0.00159353	0.00227469	0.00208863	3
OG1RF_12190_2190	OG1RF_12190	hypothetical protein OG1RF_12190	Cytoplasmic	poorly characterized	Function unknown	1.29073	0.0229356	0.028328	0.0198683	0.0237106	3	0.0176396	0.0187298	0.0187402	0.0183699	3
OG1RF_10463_463	GatB	glutamyl-tRNA(Gln) amidotransferase subunit B	Cytoplasmic	Protein synthesis	tRNA aminoacylation	1.30774	0.0624871	0.0587665	0.0602359	0.0604965	3	0.0483673	0.0417799	0.0486332	0.0462601	3
OG1RF_10703_703	RplU	50S ribosomal protein L21	Unknown	Protein synthesis	Ribosomal proteins: synthesis and modification	1.33238	0.112035	0.147163	0.101256	0.120151	3	0.0927618	0.0918175	0.0859555	0.0901783	3
OG1RF_11638_1638	PrmA	ribosomal protein L11 methyltransferase	Cytoplasmic	Protein synthesis	Ribosomal proteins: synthesis and modification	1.34293	0.0138306	0.0111571	0.0131502	0.0127126	3	0.0104994	0.0092934	0.0086063	0.00946637	3
OG1RF_10965_965	OG1RF_10965	response regulator	Cytoplasmic	cellular processes and signaling	Signal transduction mechanisms	1.34697	0.0152213	0.0108176	0.0123863	0.0128084	3	0.0088978	0.00902622	0.0106032	0.00950907	3
OG1RF_11357_1357	CodY	GTP-sensing transcriptional pleiotropic repressor CodY	Cytoplasmic	Regulatory functions	DNA interactions	1.34823	0.022211	0.0190746	0.0180418	0.0197758	3	0.0125998	0.0145748	0.0168292	0.0146679	3
OG1RF_11931_1931	Upp2	uracil phosphoribosyltransferase	Cytoplasmic	Purines, pyrimidines, nucleosides, and nucleotides	Salvage of nucleosides and nucleotides	1.35049	0.110171	0.0785076	0.0893445	0.0926742	3	0.0565675	0.0784483	0.070852	0.0686226	3
OG1RF_12202_2202	OG1RF_12202	5'-nucleotidase	Cellwall	metabolism	Nucleotide transport and metabolism	1.35659	0.00516104	0.00457152	0.00544766	0.00506007	3	0.00341427	0.00421544	0.00356026	0.00372999	3
OG1RF_10169_169	RpmD	50S ribosomal protein L30	Cytoplasmic	Protein synthesis	Ribosomal proteins: synthesis and modification	1.36272	0.133774	0.196299	0.133528	0.154534	3	0.110358	0.106736	0.123107	0.1134	3
OG1RF_10462_462	GatA	glutamyl-tRNA(Gln) amidotransferase subunit A	Cytoplasmic	Protein synthesis	tRNA aminoacylation	1.37467	0.0632302	0.0671762	0.0608473	0.0637512	3	0.0459292	0.0470319	0.0461662	0.0463758	3
OG1RF_11449_1449	TyrS2	tyrosine--tRNA ligase	Cytoplasmic	Protein synthesis	tRNA aminoacylation	1.38822	0.0320815	0.041099	0.0387053	0.0372953	3	0.0302421	0.024693	0.0256613	0.0268655	3
OG1RF_10054_54	PurR	purine operon repressor	Cytoplasmic	Purines, pyrimidines, nucleosides, and nucleotides	Purine ribonucleotide biosynthesis	1.39563	0.0141664	0.0135015	0.0148315	0.0141665	3	0.0129685	0.00654912	0.0109341	0.0101506	3
OG1RF_11094_1094	OG1RF_11094	SPFH domain/band 7 family protein	Cytoplasmic Membrane	poorly characterized	Function unknown	1.41891	0.0180182	0.0233504	0.0142803	0.0185496	3	0.011503	0.0141762	0.0135401	0.0130731	3
OG1RF_10143_143	RpiA	ribose-5-phosphate isomerase	Cytoplasmic	Energy metabolism	Pentose phosphate pathway	1.42031	0.00565442	0.0055084	0.00489186	0.00535156	3	0.00426564	0.00333735	0.00370065	0.00376788	3
OG1RF_11644_1644	AckA	acetate kinase	Cytoplasmic	Energy metabolism	Fermentation	1.43491	0.195826	0.202607	0.184797	0.19441	3	0.134089	0.122363	0.150004	0.135485	3
OG1RF_11453_1453	CcpA	catabolite control protein A	Cytoplasmic	Regulatory functions	DNA interactions	1.43542	0.0654437	0.0717443	0.0645505	0.0672462	3	0.0458188	0.0471774	0.0475469	0.0468477	3
OG1RF_11268_1268	EngA	ribosome-associated GTPase EngA	Cytoplasmic Membrane	Protein synthesis	Other	1.45814	0.0107726	0.00942604	0.00915968	0.0097861	3	0.00591031	0.00622309	0.00800064	0.00671134	3
OG1RF_12001_2001	OG1RF_12001	nicotinate phosphoribosyltransferase	Cytoplasmic	Biosynthesis of cofactors, prosthetic groups, and carriers	Pyridine nucleotides	1.46865	0.00924787	0.0163381	0.0117689	0.0124516	3	0.00886026	0.00826615	0.00830847	0.00847829	3
OG1RF_11707_1707	GalE3	NAD-dependent epimerase/dehydratase	Cytoplasmic	Cell envelope	Biosynthesis and degradation of surface polysaccharides and lipopolysaccharides	1.4738	0.0131022	0.0129165	0.0152702	0.013763	3	0.00720382	0.0105376	0.0102739	0.00933844	3
OG1RF_11658_1658	OG1RF_11658	GntR family transcriptional regulator	Cytoplasmic	information storage and processing	Transcription	1.47552	0.00395991		0.00335758	0.00365874	2	0.00275429	0.00225414	0.00243045	0.00247963	3
OG1RF_11840_1840	GlyQ	glycyl-tRNA synthetase alpha subunit	Cytoplasmic	Protein synthesis	tRNA aminoacylation	1.50864	0.0454479		0.0401505	0.0427992	2	0.0273838	0.0288616	0.028863	0.0283695	3
OG1RF_10186_186	OG1RF_10186	protein of hypothetical function DUF74	Unknown	poorly characterized	Function unknown	1.51773	0	0.00799306	0.00471276	0.00423527	2	0.00287828	0.00270279		0.00279053	2
OG1RF_12334_2334	Pnp	polyribonucleotide nucleotidyltransferase	Cytoplasmic	Transcription	Degradation of RNA	1.51824	0.0503671	0.0447404	0.0531551	0.0494208	3	0.0261195	0.0307194	0.0408151	0.0325513	3
OG1RF_11076_1076	HrcA	heat-inducible transcription repressor HrcA	Cytoplasmic	Regulatory functions	DNA interactions	1.52864	0.00377985		0.00241356	0.0030967	2		0.00180102	0.00225056	0.00202579	2
OG1RF_10711_711	NusB	transcription antitermination factor NusB	Cytoplasmic	Transcription	Transcription factors	1.52963	0.0144244	0.0196767	0.0137472	0.0159494	3	0.0100062	0.0107152	0.0105595	0.010427	3
OG1RF_11792_1792	OG1RF_11792	nucleoside 2-deoxyribosyltransferase superfamily protein	Unknown	metabolism	Nucleotide transport and metabolism	1.53316	0.00931707	0.00597872	0.00698646	0.00742741	3	0.00340468	0.00590566	0.00522318	0.00484451	3
OG1RF_12543_2543	ParB	plasmid partition ParB protein	Cytoplasmic	information storage and processing	Transcription	1.54904	0.010026	0.00860627	0.00737234	0.00866821	3	0.00429902	0.0058616	0.00662697	0.00559586	3
OG1RF_12544_2544	Soj	sporulation initiation inhibitor protein Soj	Cytoplasmic Membrane	Cellular processes	Cell division	1.5637	0.00847509	0.00720608	0.00834696	0.00800938	3	0.00533442	0.00518714	0.00484465	0.00512207	3
OG1RF_10736_736	IleS	isoleucine--tRNA ligase	Cytoplasmic	Protein synthesis	tRNA aminoacylation	1.56615	0.0531475	0.0652245	0.0651553	0.0611758	3	0.0369289	0.0378808	0.0423744	0.0390614	3
OG1RF_10951_951	CscK	fructokinase	Cytoplasmic	information storage and processing	Transcription	1.60196	0.0503273	0.0900578	0.058541	0.0663087	3	0.0430427	0.034482	0.0466523	0.0413923	3
OG1RF_12067_2067	OG1RF_12067	tellurite resistance protein	Cytoplasmic	metabolism	Inorganic ion transport and metabolism	1.60997	0.0326666	0.0307245	0.028426	0.0306057	3	0.0154501	0.0188045	0.0227758	0.0190101	3
OG1RF_10226_226	FabF	3-oxoacyl-(acyl-carrier-protein) synthase II	Cytoplasmic Membrane	Fatty acid and phospholipid metabolism	Biosynthesis	1.61044	0.0650029	0.145384	0.0828116	0.097733	3	0.0604841	0.06445	0.0571275	0.0606872	3
OG1RF_12423_2423	TreR	trehalose operon repressor	Cytoplasmic	Regulatory functions	DNA interactions	1.61745	0.00295503	0.00293033	0.00270125	0.0028622	3	0.00127807	0.00196636	0.0020643	0.00176958	3
OG1RF_12304_2304	OG1RF_12304	alpha/beta knot family protein	Cytoplasmic	Protein synthesis	tRNA and rRNA base modification	1.63889	0.00229334		0.00106688	0.00168011	2		0.00106374	0.00098656	0.00102515	2
OG1RF_11436_1436	Fhs	formate--tetrahydrofolate ligase	Cytoplasmic	metabolism	Nucleotide transport and metabolism	1.64199	0.00528993	0.00895689	0.00640027	0.00688236	3	0.00458998	0.0045497	0.00343471	0.00419146	3
OG1RF_10713_713	XseA	exodeoxyribonuclease VII large subunit	Cytoplasmic	DNA metabolism	Degradation of DNA	1.65656	0.00187195		0.00182142	0.00184669	2		0.00097237	0.00125718	0.00111477	2
OG1RF_10190_190	OG1RF_10190	ABC superfamily ATP binding cassette transporter, ABC protein	Cytoplasmic Membrane	metabolism	Amino acid transport and metabolism	1.67304	0.00267365	0.00320788	0.00319895	0.00302683	3	0.0017686	0.00150081	0.00215812	0.00180918	3
OG1RF_11095_1095	OG1RF_11095	hypothetical protein OG1RF_11095	Unknown	poorly characterized	Function unknown	1.68186	0.00861893	0.00974328	0.00667749	0.00834657	3	0.00353277	0.00520727	0.00614802	0.00496269	3
OG1RF_12537_2537	SerS2	serine--tRNA ligase	Cytoplasmic	Protein synthesis	tRNA aminoacylation	1.68824	0.0379239	0.0418079	0.0392873	0.0396731	3	0.02349	0.0238365	0.0231726	0.0234997	3
OG1RF_10710_710	Asp	alkaline shock protein	Cytoplasmic	poorly characterized	Function unknown	1.69965	0.0600441	0.0645711	0.0470745	0.0572299	3	0.0274786	0.0364492	0.0370868	0.0336715	3
OG1RF_12063_2063	MtnN	MTA/SAH nucleosidase	Cytoplasmic	Central intermediary metabolism	Other	1.71859	0.0333152	0.0324854	0.0272837	0.0310281	3	0.0199292	0.0171665	0.0170676	0.0180544	3
OG1RF_10849_849	GalK	galactokinase	Cytoplasmic	Energy metabolism	Sugars	1.72546	0.0257482	0.0364429	0.0296223	0.0306045	3	0.0233399	0.0144605	0.0154107	0.017737	3
OG1RF_10102_102	NtcA	global nitrogen regulator NtcA	Unknown	cellular processes and signaling	Signal transduction mechanisms	1.74076	0.0799043	0.0761108	0.06287	0.0729617	3	0.047019	0.0286436	0.0500783	0.0419136	3
OG1RF_10458_458	PcrA	ATP-dependent DNA helicase PcrA	Cytoplasmic	DNA metabolism	DNA replication, recombination, and repair	1.76688	0.00618991	0.00498203	0.00555073	0.00557422	3	0.00279214	0.00265929	0.0040131	0.00315484	3
OG1RF_12098_2098	OG1RF_12098	gfo/Idh/MocA family oxidoreductase	Cytoplasmic Membrane	poorly characterized	General function prediction only	1.79872	0.00354189		0.00252638	0.00303414	2	0.00174905	0.00197716	0.00133428	0.00168683	3
OG1RF_12394_2394	OG1RF_12394	YicC like protein	Cytoplasmic	poorly characterized	Conserved	1.82949	0.00564478		0.00511366	0.00537922	2	0.00313552	0.0028171	0.00286824	0.00294029	3
OG1RF_11083_1083	YhgF	YhgF like protein	Cytoplasmic	information storage and processing	Transcription	1.83044	0.00811709	0.0176858	0.00930481	0.0117026	3	0.00570089	0.00773522	0.00574381	0.00639331	3
OG1RF_10013_13	PurA	adenylosuccinate synthase	Cytoplasmic	Purines, pyrimidines, nucleosides, and nucleotides	Purine ribonucleotide biosynthesis	1.87246	0.037543	0.0237884	0.0281102	0.0298139	3	0.0185133	0.0145494	0.0147042	0.0159223	3
OG1RF_10337_337	OG1RF_10337	AMP-binding family protein	Unknown	metabolism	Lipid transport and metabolism	1.90605	0.0169991		0.0130514	0.0150252	2	0.00715777	0.00733556	0.00915534	0.00788289	3
OG1RF_11883_1883	CoaD	pantetheine-phosphate adenylyltransferase	Cytoplasmic	Biosynthesis of cofactors, prosthetic groups, and carriers	Pantothenate and coenzyme A	1.90738	0.0018437	0.00203391	0.00412168	0.00266643	3		0.0010748	0.00172111	0.00139796	2
OG1RF_12401_2401	SorD	PTS family mannose/fructose/sorbose porter component IID	Cytoplasmic Membrane	metabolism	Carbohydrate transport and metabolism	1.92384	0.00147823		0.00348145	0.00247984	2		0.00134189	0.00123612	0.00128901	2
OG1RF_10349_349	DapF	diaminopimelate epimerase	Cytoplasmic	Amino acid biosynthesis	Aspartate family	1.94723	0.0052244	0.00592079	0.00384248	0.00499589	3	0.0017612	0.00363946	0.00229628	0.00256565	3
OG1RF_11848_1848	RpsU	30S ribosomal protein S21	Cytoplasmic	Protein synthesis	Ribosomal proteins: synthesis and modification	1.96479	0.0251279		0.0245079	0.0248179	2	0.0105897	0.0123612	0.0149431	0.0126313	3
OG1RF_10587_587	OG1RF_10587	hypothetical protein OG1RF_10587	Unknown	poorly characterized	Function unknown	1.98088	0.00574045	0.0117916	0.00748888	0.0083403	3	0.00456867	0.00456581	0.00349674	0.00421041	3
OG1RF_10750_750	CelA3	PTS family porter, enzyme I	Cytoplasmic	metabolism	Carbohydrate transport and metabolism	2.01136	0.00564611	0.0162677	0.00627334	0.00939572	3	0.00502938	0.00502857	0.00395604	0.00467133	3
OG1RF_11419_1419	OG1RF_11419	conserved protein UCP028846	Cytoplasmic	poorly characterized	Function unknown	2.01866	0.0337912	0.0551971	0.0431497	0.044046	3	0.0313334	0.0229394	0.0111855	0.0218194	3
OG1RF_11844_1844	OG1RF_11844	putative metalloprotease	Cytoplasmic	Protein synthesis	Other	2.04871	0.0144314		0.0112577	0.0128446	2	0.00508681	0.00719887	0.00652309	0.00626959	3
OG1RF_11135_1135	OG1RF_11135	sugar ABC superfamily ATP binding cassette transporter, sugar-binding protein	Unknown	metabolism	Carbohydrate transport and metabolism	2.05796	0.0303461	0.0507403	0.0383127	0.0397997	3	0.0168386	0.0190799	0.0220997	0.0193394	3
OG1RF_12545_2545	GidB	16S rRNA methyltransferase GidB	Cytoplasmic	Protein synthesis	tRNA and rRNA base modification	2.06307	0.0042986		0.00721256	0.00575558	2	0.00292782	0.00272822	0.0027134	0.00278981	3
OG1RF_11137_1137	DexB	glucan 1,6-alpha-glucosidase	Cytoplasmic	metabolism	Carbohydrate transport and metabolism	2.06492	0.00539656	0.00383974	0.00402177	0.00441936	3	0.00200275	0.00224557	0.00217231	0.00214021	3
OG1RF_12477_2477	OG1RF_12477	PTS family ascorbate porter, IIB component	Cytoplasmic	metabolism	Carbohydrate transport and metabolism	2.10565	0.00823024		0.00645078	0.00734051	2	0.00358242	0.00309227	0.00378363	0.00348611	3
OG1RF_10851_851	GalT	UDP-glucose--hexose-1-phosphate uridylyltransferase	Cytoplasmic	Energy metabolism	Sugars	2.11919	0.0108199	0.00780693	0.0107834	0.00980341	3	0.00413523	0.00390956	0.00583329	0.00462602	3
OG1RF_12528_2528	OG1RF_12528	U32 family peptidase	Cytoplasmic	cellular processes and signaling	Posttranslational modification, protein turnover, chaperones	2.12622	0.00440991	0.00787725	0.00643061	0.00623925	3	0.00206737	0.00243248	0.00430346	0.00293444	3
OG1RF_12140_2140	DnaX	DNA polymerase III, gamma/tau subunit DnaX	Cytoplasmic	DNA metabolism	DNA replication, recombination, and repair	2.2087	0.00221954	0.00340614	0.0021203	0.00258199	3	0.00123926	0.00174949	0.000518283	0.00116901	3
OG1RF_11513_1513	LevE	PTS family mannose/fructose/sorbose porter, IIB component	Cytoplasmic	metabolism	Carbohydrate transport and metabolism	2.21581	0.00529808	0.00295761	0.00472013	0.00432527	3	0.00156825	0.00278148	0.00150629	0.00195201	3
OG1RF_12365_2365	Rnc2	ribonuclease III	Cytoplasmic	Transcription	RNA processing	2.27624	0.00695136		0.00661083	0.00678109	2	0.00411477	0.00243291	0.00238956	0.00297908	3
OG1RF_11373_1373	Lpd2	dihydrolipoyl dehydrogenase	Cytoplasmic	metabolism	Energy production and conversion	2.29007	0.0114499	0.00750478	0.012132	0.0103622	3	0.00375168	0.00494921	0.00487365	0.00452485	3
OG1RF_11875_1875	OG1RF_11875	acyl-CoA thioester hydrolas	Unknown	metabolism	Lipid transport and metabolism	2.31234	0.00278508		0.00262205	0.00270357	2	0.00148036	0.00137306	0.000654145	0.00116919	3
OG1RF_12103_2103	AhpC	peroxiredoxin	Cytoplasmic	Cellular processes	Detoxification	2.31886	0.11203	0.0918068	0.107753	0.103863	3	0.0390512	0.0331996	0.0621215	0.0447908	3
OG1RF_10708_708	PepQ	xaa-Pro dipeptidase	Cytoplasmic	metabolism	Amino acid transport and metabolism	2.35185	0.04806	0.029434	0.0350171	0.0375037	3	0.0161187	0.0149874	0.0167333	0.0159465	3
OG1RF_10367_367	OG1RF_10367	decarboxylase	Cytoplasmic	Cellular processes	Adaptations to atypical conditions	2.35682	0.0511794	0.0812773	0.0585357	0.0636641	3	0.0185499	0.0194043	0.0430838	0.0270127	3
OG1RF_11615_1615	UlaB	PTS family ascorbate porter, IIB component	Cytoplasmic	metabolism	Carbohydrate transport and metabolism	2.39834	0.0167297		0.0117115	0.0142206	2	0.00603799	0.00646139	0.00528872	0.00592937	3
OG1RF_11298_1298	LexA	repressor lexA	Cytoplasmic	DNA metabolism	DNA replication, recombination, and repair	2.44686	0	0.00959387	0.0116111	0.00706831	2	0.00276776	0.00313199	0.00276644	0.00288873	3
OG1RF_10848_848	GalM	galactose mutarotase	Cytoplasmic	metabolism	Carbohydrate transport and metabolism	2.5469	0.0242591	0.00816891	0.0127608	0.015063	3	0.00525624	0.00616642	0.00632005	0.00591424	3
OG1RF_11375_1375	Ptb	branched-chain phosphotransacylase	Cytoplasmic	Energy metabolism	Amino acids and amines	2.79804	0.0150463	0.0103605	0.0118462	0.0124177	3	0.0052186	0.0035563	0.00453906	0.00443799	3
OG1RF_12301_2301	OG1RF_12301	hypothetical protein OG1RF_12301	Unknown	poorly characterized	Function unknown	2.82271	0.00993049		0.005256	0.00759324	2	0.00251617	0.00332852	0.00222548	0.00269006	3
OG1RF_11860_1860	GuaC	GMP reductase	Cytoplasmic	Purines, pyrimidines, nucleosides, and nucleotides	Nucleotide and nucleoside interconversions	2.83598	0.0070818	0.00464478	0.00487536	0.00553398	3	0.00256533	0.00173904	0.00154966	0.00195134	3
OG1RF_11798_1798	Xpt	xanthine phosphoribosyltransferase	Cytoplasmic	Purines, pyrimidines, nucleosides, and nucleotides	Salvage of nucleosides and nucleotides	2.96652	0.0148284	0.0149979	0.0123091	0.0140451	3	0.00410799	0.00497133	0.00512433	0.00473455	3
OG1RF_11851_1851	ThrB	homoserine kinase	Cytoplasmic	Amino acid biosynthesis	Aspartate family	2.96987	0.00532259	0.013155	0.0059125	0.00813004	3	0.00395104	0.00212432	0.00213717	0.00273751	3
OG1RF_12112_2112	DltA	D-alanine--D-alanyl carrier protein ligase subunit 1	Cytoplasmic	Cell envelope	Biosynthesis and degradation of murein sacculus and peptidoglycan	2.9874	0.00956937	0.00378932	0.00995875	0.00777248	3	0.00175354	0.00263032	0.0034214	0.00260175	3
OG1RF_11207_1207	OG1RF_11207	V-type ATPase, subunit F	Cytoplasmic	metabolism	Amino acid transport and metabolism	3.0299	0.00436866		0.00525319	0.00481093	2	0.00180841	0.00155946	0.00139557	0.00158781	3
OG1RF_11017_1017	OG1RF_11017	hypothetical protein OG1RF_11017	Unknown	poorly characterized	Function unknown	3.11067	0.0226331	0.0318901	0.032419	0.0289807	3	0.00688704	0.00982166	0.011241	0.00931655	3
OG1RF_12102_2102	TrxB2	thioredoxin-disulfide reductase	Cytoplasmic	cellular processes and signaling	Posttranslational modification, protein turnover, chaperones	3.30493	0.0188011	0.0154765	0.0121899	0.0154892	3	0.00362156	0.00334792	0.00709058	0.00468669	3
OG1RF_10986_986	BudA	alpha-acetolactate decarboxylase	Cytoplasmic	Energy metabolism	Fermentation	3.3669	0.0101868		0.010938	0.0105624	2	0.00222496	0.00432034	0.00286606	0.00313712	3
OG1RF_11423_1423	PyrE	orotate phosphoribosyltransferase	Cytoplasmic	Purines, pyrimidines, nucleosides, and nucleotides	Pyrimidine ribonucleotide biosynthesis	3.70262	0.00770954		0.00586502	0.00678728	2	0.00229744	0.00136876		0.0018331	2
OG1RF_11639_1639	OG1RF_11639	hypothetical protein OG1RF_11639	Cytoplasmic	poorly characterized	Function unknown	4.08891	0.00756508	0.0153931	0.0064509	0.00980302	3	0.0011445	0.00325274	0.00279517	0.00239747	3
OG1RF_10281_281	OG1RF_10281	secreted antigen	Extracellular	poorly characterized	Function unknown	4.20578	0.00779924		0.00370424	0.00575174	2	0.000812833	0.00184532	0.00144459	0.00136758	3
OG1RF_11429_1429	PyrC	dihydroorotase	Cytoplasmic	Purines, pyrimidines, nucleosides, and nucleotides	Pyrimidine ribonucleotide biosynthesis	4.23075	0.0429369	0.0393069	0.0310587	0.0377675	3	0.00609651	0.0073215	0.0133627	0.00892691	3
OG1RF_10366_366	TyrS	tyrosine--tRNA ligase	Cytoplasmic	Protein synthesis	tRNA aminoacylation	4.24065	0.110368	0.310972	0.137013	0.186118	3	0.0148847	0.0116451	0.105137	0.043889	3
OG1RF_11427_1427	CarB	carbamoyl-phosphate synthase, large subunit	Cytoplasmic	Purines, pyrimidines, nucleosides, and nucleotides	Pyrimidine ribonucleotide biosynthesis	4.31965	0.0251981	0.0232632	0.0214638	0.0233084	3	0.00429469	0.00488151	0.00701147	0.00539589	3
OG1RF_10434_434	LacD1	tagatose-bisphosphate aldolase	Unknown	Energy metabolism	Biosynthesis and degradation of polysaccharides	4.98846	0.0956453	0.111024	0.0802394	0.0956363	3	0.0194189	0.0189831	0.0191126	0.0191715	3
OG1RF_12210_2210	KtrA	Trk family potassium (K+) transporter, NAD+ binding protein	Cytoplasmic	metabolism	Inorganic ion transport and metabolism	5.11531	0.0145013		0.00967609	0.0120887	2	0.0020701	0.000841544	0.00417807	0.00236324	3
OG1RF_11432_1432	Upp	uracil phosphoribosyltransferase	Cytoplasmic	metabolism	Nucleotide transport and metabolism	5.13535	0.0178018	0.0140198	0.0207272	0.0175163	3	0.00230317	0.00228494	0.00564466	0.00341092	3
OG1RF_11367_1367	PanE	2-dehydropantoate 2-reductase	Unknown	Biosynthesis of cofactors, prosthetic groups, and carriers	Pantothenate and coenzyme A	5.20389	0.0410979	0.0301815	0.0393123	0.0368639	3	0.00711234	0.0102594	0.00388001	0.00708391	3
OG1RF_11329_1329	PflB	formate acetyltransferase	Cytoplasmic	Energy metabolism	Fermentation	5.29576	0.215447	0.173414	0.19336	0.194074	3	0.0189046	0.0278732	0.0631632	0.036647	3
OG1RF_12264_2264	OG1RF_12264	phosphoglycerate mutase	Cytoplasmic	metabolism	Carbohydrate transport and metabolism	5.50023	0.00227307	0.0234007	0.00264932	0.00944104	3		0.00125321	0.00217975	0.00171648	2
OG1RF_10627_627	Aad	aldehyde-alcohol dehydrogenase	Cytoplasmic	metabolism	Energy production and conversion	9.47351	0.109236	0.190844	0.124644	0.141575	3	0.00336583	0.00889597	0.032571	0.0149443	3
OG1RF_10095_95	SerS	serine--tRNA ligase	Cytoplasmic	Protein synthesis	tRNA aminoacylation	0.103875	0.00106669	0.00118115	0.000847845	0.00103189	3	0.00137581		0.0184922	0.00993399	2
OG1RF_12405_2405	Gnd2	6-phosphogluconate dehydrogenase	Cytoplasmic	Energy metabolism	Pentose phosphate pathway	0.307747	0.00145002		0.00184432	0.00164717	2	0.00737897	0.00620346	0.0024746	0.00535234	3
OG1RF_11590_1590	GlpF2	MIP family glycerol uptake facilitator protein GlpF	Cytoplasmic Membrane	Transport and binding proteins	Unknown substrate	0.335612	0.0027734		0.00336839	0.00307089	2	0.0129066	0.00883612	0.00570771	0.00915013	0
OG1RF_12400_2400	SorB2	PTS family mannose/fructose/sorbose porter, IIB component	Cytoplasmic	metabolism	Carbohydrate transport and metabolism	0.348208	0.00282461		0.00275179	0.0027882	2	0.0128876	0.00803181	0.00310247	0.0080073	3
OG1RF_12404_2404	OG1RF_12404	D-isomer specific 2-hydroxyacid dehydrogenase	Cytoplasmic	metabolism	Energy production and conversion	0.382696	0.00276032		0.00256678	0.00266355	2	0.00947696	0.0088853	0.00251762	0.00695996	3
OG1RF_10117_117	OG1RF_10117	lipase/acylhydrolase	Cytoplasmic	metabolism	Amino acid transport and metabolism	0.383344	0.00354593		0.00286146	0.00320369	2	0.0110566	0.0090282	0.00498684	0.00835723	3
OG1RF_11994_1994	Rnr	ribonuclease R	Cytoplasmic	Transcription	Degradation of RNA	0.388217	0.00355481	0.00336093	0.00303081	0.00331552	3	0.00272418	0.0106506	0.0122464	0.00854038	3
OG1RF_10917_917	GloA5	lactoylglutathione lyase	Cytoplasmic	metabolism	Amino acid transport and metabolism	0.398735	0.0159824	0.00333866	0.025612	0.0149777	3	0.0522921	0.0356276	0.0247693	0.037563	3
OG1RF_10846_846	Maa	maltose O-acetyltransferase	Cytoplasmic	poorly characterized	General function prediction only	0.441054	0.000377531		0.0012358	0.000806667	2	0.0021364	0.00199858	0.00135189	0.00182895	3
OG1RF_10348_348	SodA	superoxide dismutase	Extracellular	metabolism	Inorganic ion transport and metabolism	0.451725	0.0182363	0.126706	0.0636524	0.0695314	3	0.183897	0.152314	0.125562	0.153924	3
OG1RF_11450_1450	Pbp1B	penicillin-binding protein 1B	Cytoplasmic Membrane	Cell envelope	Biosynthesis and degradation of surface polysaccharides and lipopolysaccharides	0.472862	0.00182355		0.0019002	0.00186188	2	0.00170048	0.00793905	0.00217284	0.00393746	0
OG1RF_11221_1221	LysA	diaminopimelate decarboxylase	Cytoplasmic	Amino acid biosynthesis	Aspartate family	0.487115	0.00130577		0.000666077	0.000985926	2	0.00325558	0.000792435		0.00202401	2
OG1RF_10148_148	ThiD	phosphomethylpyrimidine kinase	Cytoplasmic	Biosynthesis of cofactors, prosthetic groups, and carriers	Thiamine	0.502437	0.0104008	0.0173665	0.00737585	0.0117144	3	0.0519978	0.00534779	0.0125998	0.0233151	3
OG1RF_12417_2417	OG1RF_12417	hypothetical protein	Unknown	poorly characterized	Function unknown	0.507033	0.00171793	0.00436713	0.002391	0.00282536	3	0.00752761	0.00250829	0.00668108	0.00557233	3
OG1RF_10171_171	SecY	preprotein translocase subunit SecY	Cytoplasmic Membrane	Protein fate	Protein and peptide secretion and trafficking	0.510971	0.0031461	0.000231013	0.00210753	0.00182822	3	0.00480889	0.00288292	0.00304196	0.00357793	3
OG1RF_10479_479	OG1RF_10479	sodium/dicarboxylate symporter family protein	Cytoplasmic Membrane	poorly characterized	General function prediction only	0.513365	0.00625448		0.00642374	0.00633911	2	0.00529293	0.0165576	0.0151939	0.0123481	3
OG1RF_11985_1985	AtpC2	ATP synthase F1 sector epsilon subunit	Cytoplasmic	Energy metabolism	ATP-proton motive force interconversion	0.528192	0.00429851		0.00327975	0.00378913	2	0.00745132	0.00455014	0.00951987	0.00717378	3
OG1RF_10963_963	OG1RF_10963	DegV family protein	Cytoplasmic	poorly characterized	General	0.538983	0.00667322	0.00822249	0.00283373	0.00590982	3	0.00776312	0.0142394	0.0108917	0.0109647	3
OG1RF_11319_1319	ScrB	sucrose-6-phosphate dehydrogenase	Cytoplasmic	Energy metabolism	Biosynthesis and degradation of polysaccharides	0.544378	0.00290985		0.00184823	0.00237904	2	0.00647723	0.00226317		0.0043702	2
OG1RF_10012_12	DnaB	replicative DNA helicase DnaB	Cytoplasmic Membrane	DNA metabolism	DNA replication, recombination, and repair	0.54668	0.00240668		0.00221929	0.00231298	2		0.002232	0.00622994	0.00423097	2
OG1RF_10017_17	LevR	transcriptional regulatory protein LevR	Cytoplasmic	information storage and processing	Transcription	0.547792	0.00672566	0.00539792	0.00200376	0.00470911	3	0.0101004		0.00709268	0.00859654	2
OG1RF_11403_1403	OG1RF_11403	short-chain dehydrogenase/reductase family oxidoreductase	Cytoplasmic	poorly characterized	General function prediction only	0.554152	0.00727252		0.00169107	0.00448179	2	0.00817374	0.00683825	0.009251	0.00808766	0
OG1RF_11673_1673	TrmU	tRNA (5-methylaminomethyl-2-thiouridylate)-methyltransferase	Cytoplasmic	Protein synthesis	tRNA and rRNA base modification	0.560144	0.00797184		0.00697097	0.00747141	2	0.00666678	0.0212844	0.012064	0.0133384	0
OG1RF_10123_123	Cdd	cytidine deaminase	Unknown	Purines, pyrimidines, nucleosides, and nucleotides	Salvage of nucleosides and nucleotides	0.5608	0.00235723	0.00478664	0.00263472	0.00325953	3	0.00675067	0.00635719	0.00432899	0.00581229	3
OG1RF_12285_2285	Cbh	putative penicillin amidase	Cytoplasmic	Cell envelope	Biosynthesis and degradation of surface polysaccharides and lipopolysaccharides	0.563902	0.00195179		0.00215225	0.00205202	2	0.00327863	0.00520817	0.0024301	0.00363897	3
OG1RF_10155_155	RpsS	30S ribosomal protein S19	Cytoplasmic	Protein synthesis	Ribosomal proteins: synthesis and modification	0.566778	0.0606766	0.0042119	0.0754202	0.0467695	3	0.0630498	0.0917508	0.0927544	0.0825183	3
OG1RF_12146_2146	OG1RF_12146	rhodanese family protein	Cytoplasmic Membrane	metabolism	Inorganic ion transport and metabolism	0.569416	0.00127568		0.00065512	0.000965401	2	0.00112299		0.00226786	0.00169542	2
OG1RF_11280_1280	AroE	shikimate dehydrogenase	Unknown	Amino acid biosynthesis	Aromatic amino acid family	0.574264	0.000605061	0.00372626	0.00112321	0.00181818	3		0.000873206	0.00545899	0.0031661	2
OG1RF_11893_1893	SuhB	inositol-phosphate phosphatase	Cytoplasmic Membrane	metabolism	Carbohydrate transport and metabolism	0.575826	0.00109512	0.00236231	0.00101343	0.00149029	3	0.00341834	0.00197782	0.00236811	0.00258809	3
OG1RF_12440_2440	CinA	competence/damage-inducible protein CinA	Unknown	DNA metabolism	DNA replication, recombination, and repair	0.580731	0.00194553		0.00239646	0.002171	2	0.00277801	0.00460298	0.00383417	0.00373839	3
OG1RF_11322_1322	YckE2	beta-glucosidase	Cytoplasmic	metabolism	Carbohydrate transport and metabolism	0.581021	0.00215428		0.00151825	0.00183627	2	0.00301106	0.00482975	0.00164043	0.00316041	0
OG1RF_11404_1404	Rnz	ribonuclease Z	Cytoplasmic	Transcription	RNA processing	0.585054	0.00303124		0.00163122	0.00233123	2	0.00489405	0.00203772	0.00502216	0.00398464	0
OG1RF_10175_175	RpsM	30S ribosomal protein S13	Cytoplasmic	Protein synthesis	Ribosomal proteins: synthesis and modification	0.585305	0.101715	0.0438034	0.101301	0.0822732	3	0.199755	0.152006	0.0699329	0.140565	3
OG1RF_11668_1668	TopB	DNA topoisomerase TopB	Cytoplasmic	DNA metabolism	DNA replication, recombination, and repair	0.588512	0.00402545	0.0150411	0.0041633	0.0077433	3	0.0158484	0.0202066	0.00341727	0.0131574	3
OG1RF_12309_2309	PepA2	glutamyl aminopeptidase	Cytoplasmic	Protein fate	Degradation of proteins, peptides, and glycopeptides	0.588671	0.0365989	0.0153903	0.0498577	0.033949	3	0.0698986	0.0622622	0.0408507	0.0576705	3
OG1RF_12562_2562	OadA	oxaloacetate decarboxylase	Cytoplasmic	metabolism	Energy production and conversion	0.588929	0.01762	0.00692623	0.0206449	0.0150637	3	0.0265168	0.0211284	0.0290893	0.0255782	3
OG1RF_11020_1020	OG1RF_11020	hypothetical protein	Cytoplasmic Membrane	poorly characterized	Function unknown	0.589805	0.0016318		0.00211962	0.00187571	2		0.00135548	0.00500495	0.00318022	2
OG1RF_11454_1454	PepQ2	xaa-Pro dipeptidase	Cytoplasmic	metabolism	Amino acid transport and metabolism	0.592116	0.00528209	0.00251487	0.0108074	0.00620145	3	0.0144017	0.00733574	0.00968263	0.0104734	3
OG1RF_11566_1566	RimM	16S rRNA processing protein RimM	Cytoplasmic	Transcription	RNA processing	0.604037	0.00118029	0.00272785	0.00162631	0.00184482	3	0.00349057	0.00376065	0.00191121	0.00305415	3
OG1RF_10941_941	AnsB2	asparaginase	Cytoplasmic	metabolism	Amino acid transport and metabolism	0.612194	0.00672549		0.0012959	0.00401069	2	0.00683035	0.00581557	0.00700812	0.00655135	0
OG1RF_12046_2046	MecA	adapter protein MecA	Cytoplasmic	cellular processes and signaling	Posttranslational modification, protein turnover, chaperones	0.617826	0.0014613	0.00226002	0.00167553	0.00179895	3	0.0016775	0.00482754	0.00223018	0.00291174	3
OG1RF_11155_1155	CspA	cold shock protein CspA	Cytoplasmic	information storage and processing	Transcription	0.619959	0.0071544	0.0122144	0.00193662	0.00710181	3	0.00514811	0.0177624		0.0114553	2
OG1RF_10210_210	HslO	chaperonin HslO	Cytoplasmic	cellular processes and signaling	Posttranslational modification, protein turnover, chaperones	0.621727	0.0052551	0.0025809	0.00534659	0.0043942	3	0.00521246	0.0089286	0.00706213	0.00706773	3
OG1RF_10769_769	Ndk	nucleoside diphosphate kinase	Cytoplasmic	metabolism	Nucleotide transport and metabolism	0.625254	0.005187		0.00846892	0.00682796	2	0.0117609	0.0127267	0.00827329	0.0109203	3
OG1RF_10638_638	OppD	ABC superfamily ATP binding cassette transporter, ABC protein	Cytoplasmic Membrane	Transport and binding proteins	Amino acids, peptides and amines	0.627099	0.00407289	0.00111834	0.00177759	0.00232294	3	0.00190488	0.00451087	0.00469705	0.00370427	3
OG1RF_12333_2333	MreC	rod shape-determining protein MreC	Unknown	Cell envelope	Biosynthesis and degradation of murein sacculus and peptidoglycan	0.632229	0.00244208	0.00754077	0.00443753	0.00480679	3	0.00441841	0.00665182	0.0117386	0.00760293	3
OG1RF_11015_1015	OG1RF_11015	gfo/Idh/MocA family oxidoreductase	Cytoplasmic	poorly characterized	General function prediction only	0.632647	0.00291398	0.00482961	0.00412268	0.00395542	3	0.00617248	0.0043443	0.00823977	0.00625219	3
OG1RF_12535_2535	OG1RF_12535	response regulator	Cytoplasmic	cellular processes and signaling	Signal transduction mechanisms	0.633047	0.0205083	0.0113326	0.014276	0.0153723	3	0.029129	0.019883	0.0238372	0.0242831	3
OG1RF_11038_1038	OG1RF_11038	protein of hypothetical function DUF150	Cytoplasmic	poorly characterized	Function unknown	0.635558	0.00272797	0.000484554	0.00285393	0.00202215	3	0.00171982	0.00471876	0.0031065	0.00318169	3
OG1RF_12486_2486	RpsI3	30S ribosomal protein S9	Cytoplasmic	Protein synthesis	Ribosomal proteins: synthesis and modification	0.637445	0.111523	0.0295171	0.133186	0.0914089	3	0.173502	0.136817	0.119878	0.143399	3
OG1RF_11988_1988	AtpA2	ATP synthase F1 sector alpha subunit	Cytoplasmic	Energy metabolism	ATP-proton motive force interconversion	0.637737	0.0443131	0.0129445	0.0339428	0.0304002	3	0.0424266	0.0467783	0.0538014	0.0476688	3
OG1RF_11455_1455	OG1RF_11455	general stress protein	Unknown	poorly characterized	General function prediction only	0.640613	0.0799164	0.0134285	0.0723771	0.0552407	3	0.0746849	0.0921619	0.091846	0.0862309	3
OG1RF_12374_2374	OG1RF_12374	DAK2 domain protein	Cytoplasmic	poorly characterized	General function prediction only	0.642531	0.0439278	0.0493094	0.00243009	0.0318891	3	0.0492115	0.0512472	0.0484325	0.0496304	3
OG1RF_11331_1331	ParE	DNA topoisomerase (ATP-hydrolyzing) ParE	Cytoplasmic	DNA metabolism	DNA replication, recombination, and repair	0.648878	0.00776451	0.00242251	0.00996676	0.00671793	3	0.0150605	0.00693273	0.00906621	0.0103531	3
OG1RF_11626_1626	Gap2	glyceraldehyde-3-phosphate dehydrogenase (phosphorylating)	Cytoplasmic	Energy metabolism	Glycolysis/gluconeogenesis	0.651842	0.111243	0.134553	0.0733537	0.106383	3	0.130396	0.150834	0.208384	0.163204	3
OG1RF_11014_1014	YckE	beta-glucosidase	Cytoplasmic	metabolism	Carbohydrate transport and metabolism	0.653853	0.000945168		0.00410582	0.00252549	2	0.00274011	0.00420121	0.00464611	0.00386248	0
OG1RF_10778_778	PfkA	6-phosphofructokinase	Cytoplasmic	Energy metabolism	Glycolysis/gluconeogenesis	0.653997	0.0807443	0.0489872	0.129561	0.0864308	3	0.120477	0.119884	0.156112	0.132158	3
OG1RF_10741_741	OG1RF_10741	gfo/Idh/MocA family oxidoreductase	Unknown	poorly characterized	General function prediction only	0.657241	0.00543185	0.00332564	0.0044483	0.00440193	3	0.00797521	0.00811316	0.00400439	0.00669759	3
OG1RF_10198_198	AldA	aldehyde dehydrogenase (NAD(+))	Cytoplasmic	metabolism	Energy production and conversion	0.659313	0.00990448	0.00340762	0.00882319	0.00737843	3	0.0139153	0.0100816	0.00957628	0.0111911	3
OG1RF_10682_682	PgmB	beta-phosphoglucomutase	Cytoplasmic	Energy metabolism	Glycolysis/gluconeogenesis	0.659384	0.00157786	0.00160063	0.000564244	0.00124758	3	0.00206701	0.00231422	0.00129486	0.00189203	3
OG1RF_11989_1989	AtpH	ATP synthase F1 sector delta subunit	Cytoplasmic	Energy metabolism	ATP-proton motive force interconversion	0.671068	0.00362131	0.00464569	0.0029107	0.0037259	3	0.00458571	0.00605847	0.0060124	0.00555219	3
OG1RF_10394_394	YebC	glucose-1-phosphate adenylyl transferase	Cytoplasmic	Regulatory functions	DNA interactions	0.672042	0.000512565		0.00184997	0.00118127	2	0.00266919	0.000846756	0.00175724	0.00175773	3
OG1RF_10066_66	OG1RF_10066	crp/Fnr family transcriptional regulator	Cytoplasmic	cellular processes and signaling	Signal transduction mechanisms	0.678378	0.000981026		0.00323994	0.00211048	2	0.00226842	0.00261501	0.00444978	0.00311107	3
OG1RF_11467_1467	PstB2	ABC superfamily ATP binding cassette transporter, ABC protein	Cytoplasmic Membrane	Transport and binding proteins	Anions	0.67987	0.00142765		0.00116431	0.00129598	2		0.00121649	0.00259595	0.00190622	2
OG1RF_11356_1356	OG1RF_11356	aldose epimerase	Cytoplasmic	metabolism	Carbohydrate transport and metabolism	0.684699	0.00329142	0.00620967	0.00389729	0.00446613	3	0.00574032	0.0112684	0.00255957	0.00652276	3
OG1RF_12179_2179	AccD	acetyl-coA carboxylase carboxyl transferase subunit beta	Cytoplasmic	Fatty acid and phospholipid metabolism	Biosynthesis	0.692446	0.0148202	0.00522426	0.0161955	0.01208	3	0.0160414	0.0182452	0.0180496	0.0174454	3
OG1RF_10439_439	PrfC	peptide chain release factor RF3	Cytoplasmic	Protein synthesis	Translation factors	0.693881	0.0121706	0.00255387	0.0150082	0.00991088	3	0.0111151	0.0141129	0.0176217	0.0142833	3
OG1RF_10505_505	ClpP	ATP-dependent Clp protease proteolytic subunit	Cytoplasmic	Protein fate	Degradation of proteins, peptides, and glycopeptides	0.695579	0.103073	0.0255728	0.0828519	0.0704994	3	0.0863496	0.104849	0.112861	0.101353	3
OG1RF_11136_1136	NplT	neopullulanase	Cytoplasmic	metabolism	Carbohydrate transport and metabolism	0.697724	0.00335128		0.00292206	0.00313667	2	0.00348956	0.00501919	0.00497798	0.00449558	0
OG1RF_12464_2464	OG1RF_12464	ABC superfamily ATP binding cassette transporter, binding protein	Cytoplasmic Membrane	metabolism	Inorganic ion transport and metabolism	0.699081	0.00989691	0.0137322	0.0148886	0.0128392	3	0.0167756	0.0242938	0.0140282	0.0183659	3
OG1RF_12143_2143	OG1RF_12143	hypothetical protein	Cytoplasmic Membrane	poorly characterized	General function prediction only	0.705128	0.0258257		0.0260818	0.0259538	2	0.0457918	0.0348996	0.02973	0.0368072	3
OG1RF_12201_2201	OG1RF_12201	D-isomer specific 2-hydroxyacid dehydrogenase	Cytoplasmic	metabolism	Coenzyme transport and metabolism	0.706125	0.011601	0.00180392	0.0104693	0.00795806	3	0.0112524	0.0110961	0.0114616	0.01127	3
OG1RF_10266_266	OG1RF_10266	amidohydrolase	Cytoplasmic	metabolism	Nucleotide transport and metabolism	0.709373	0.00446345		0.00384663	0.00415504	2	0.0063279	0.0061373	0.00510685	0.00585735	3
OG1RF_10230_230	Efp	elongation factor P	Cytoplasmic	Protein synthesis	Translation factors	0.719858	0.0927639	0.0108631	0.0682503	0.0572924	3	0.0673842	0.0803874	0.090994	0.0795885	3
OG1RF_10952_952	OG1RF_10952	hypothetical protein	Cytoplasmic	poorly characterized	Function unknown	0.719924	0.0555377		0.0374829	0.0465103	2	0.0678716	0.0709498	0.0549922	0.0646045	0
OG1RF_10727_727	MurG	UDP-N-acetylglucosamine--N-acetylmuramyl-(pentapeptide) pyrophosphoryl-undecaprenol N-acetylglucosamine transferase	Cytoplasmic Membrane	Cell envelope	Biosynthesis and degradation of murein sacculus and peptidoglycan	0.720655	0.00213686	0.00127833	0.00157718	0.00166412	3	0.00117159	0.00184174	0.0039142	0.00230918	3
OG1RF_11149_1149	OG1RF_11149	dihydroxyacetone kinase	Unknown	metabolism	Carbohydrate transport and metabolism	0.720769	0.063012	0.136109	0.0726864	0.0906024	3	0.110246	0.111113	0.155748	0.125703	3
OG1RF_12549_2549	Tal	transaldolase	Cytoplasmic	Energy metabolism	Pentose phosphate pathway	0.723832	0.00111917		0.000933847	0.00102651	2	0.00117255	0.00106627	0.00201565	0.00141816	3
OG1RF_10153_153	RplW	50S ribosomal protein L23	Unknown	Protein synthesis	Ribosomal proteins: synthesis and modification	0.725867	0.155261	0.0524411	0.11481	0.107504	3	0.154887	0.151502	0.137923	0.148104	3
OG1RF_11445_1445	Nfo	deoxyribonuclease IV (phage-T(4)-induced)	Cytoplasmic	DNA metabolism	DNA replication, recombination, and repair	0.726764	0.00908111	0.00395075	0.0104368	0.0078229	3	0.0108365	0.0116513	0.00980427	0.010764	3
OG1RF_11148_1148	DhaK	dihydroxyacetone kinase	Cytoplasmic	metabolism	Carbohydrate transport and metabolism	0.726878	0.0843785	0.0664233	0.0561742	0.068992	3	0.0738124	0.107236	0.103698	0.0949155	3
OG1RF_11278_1278	OG1RF_11278	hypothetical protein	Cytoplasmic	poorly characterized	Function unknown	0.727124	0.0788276	0.049811	0.102594	0.0770775	3	0.12434	0.096578	0.0970919	0.106003	3
OG1RF_10233_233	MetC	cystathionine gamma-synthase	Cytoplasmic	metabolism	Amino acid transport and metabolism	0.727197	0.0973349	0.0486256	0.105326	0.0837621	3	0.100109	0.129417	0.116029	0.115185	3
OG1RF_10781_781	RpmF	50S ribosomal protein L32	Cytoplasmic	Protein synthesis	Ribosomal proteins: synthesis and modification	0.730507	0.0575959		0.0420826	0.0498392	2	0.053801	0.103661	0.0472141	0.0682255	3
OG1RF_10252_252	OG1RF_10252	acyl-ACP family thioesterase	Cytoplasmic	metabolism	Lipid transport and metabolism	0.731048	0.00280571	0.00212308	0.0050114	0.0033134	3	0.00271243	0.0057789	0.00510585	0.00453239	3
OG1RF_10953_953	OG1RF_10953	oxygen-insensitive NADPH nitroreductase	Cytoplasmic	metabolism	Energy production and conversion	0.731862	0.00324495		0.0017893	0.00251713	2	0.00279806	0.00305562	0.00446436	0.00343935	0
OG1RF_12097_2097	MurB	UDP-N-acetylmuramate dehydrogenase	Cytoplasmic	Cell envelope	Biosynthesis and degradation of murein sacculus and peptidoglycan	0.734956	0.00904538	0.00514715	0.00836435	0.00751896	3	0.00869086	0.0124753	0.00952531	0.0102305	3
OG1RF_11811_1811	PolC	DNA polymerase III PolC	Cytoplasmic	DNA metabolism	DNA replication, recombination, and repair	0.7364	0.00728762		0.00558111	0.00643437	2	0.00602779	0.0114474		0.00873759	2
OG1RF_10156_156	RplV	50S ribosomal protein L22	Cytoplasmic	Protein synthesis	Ribosomal proteins: synthesis and modification	0.737891	0.092726	0.0242556	0.0600233	0.0590017	3	0.074791	0.0933165	0.0717721	0.0799599	3
OG1RF_11146_1146	GldA	glycerol dehydrogenase	Cytoplasmic	metabolism	Energy production and conversion	0.73931	0.170934	0.0559339	0.169564	0.132144	3	0.102685	0.198077	0.235457	0.17874	3
OG1RF_10225_225	FabI	enoyl-[acyl-carrier-protein] reductase (NADH)	Cytoplasmic Membrane	Fatty acid and phospholipid metabolism	Biosynthesis	0.742157	0.0534059	0.0958727	0.0638917	0.0710568	3	0.0995806	0.095383	0.092267	0.0957436	3
OG1RF_10353_353	OG1RF_10353	LemA family protein	Unknown	poorly characterized	Function unknown	0.743022	0.00293577		0.00127834	0.00210706	2	0.00392092	0.00199791	0.00258854	0.00283579	3
OG1RF_12200_2200	TrxB3	thioredoxin-disulfide reductase	Cytoplasmic	cellular processes and signaling	Posttranslational modification, protein turnover, chaperones	0.744868	0.0067155	0.00850421	0.00861924	0.00794631	3	0.00830622	0.00924957	0.0144485	0.0106681	3
OG1RF_11643_1643	OG1RF_11643	universal stress protein	Unknown	cellular processes and signaling	Signal transduction mechanisms	0.746047	0.0251277	0.0203599	0.0249932	0.0234936	3	0.0347703	0.0371429	0.022559	0.0314907	3
OG1RF_10464_464	YegS	lipid kinase YegS	Cytoplasmic	poorly characterized	Enzymes of unknown specificity	0.746644	0.00192097		0.00317516	0.00254807	2	0.0048007	0.00381873	0.00161865	0.00341269	3
OG1RF_10242_242	CopZ	MerTP family copper permease, binding protein CopZ	Unknown	Transport and binding proteins	Cations and iron carrying compounds	0.747967	0.011801		0.00533262	0.00856683	2		0.0109651	0.0119419	0.0114535	2
OG1RF_10037_37	ProB	glutamate 5-kinase	Cytoplasmic	Amino acid biosynthesis	Glutamate family	0.748303	0.00246771		0.00141697	0.00194234	2		0.00157343	0.00361789	0.00259566	2
OG1RF_11577_1577	OG1RF_11577	ROK family protein	Cytoplasmic	information storage and processing	Transcription	0.748922	0.00349916	0.00618865	0.00360397	0.00443059	3	0.00481126	0.00879817	0.00413844	0.00591596	3
OG1RF_10447_447	PtsH	PTS family porter, phosphocarrier protein HPR	Cytoplasmic	Signal transduction	PTS	0.749664	0.171302	0.377969	0.0608109	0.203361	3		0.232867	0.309671	0.271269	2
OG1RF_11864_1864	OG1RF_11864	phosphoglycerate mutase	Cytoplasmic	metabolism	Carbohydrate transport and metabolism	0.750052	0.00314478	0.00318342	0.00253889	0.0029557	3	0.00604169	0.00344449	0.00233578	0.00394065	3
OG1RF_10159_159	RpmC	50S ribosomal protein L29	Cytoplasmic	Protein synthesis	Ribosomal proteins: synthesis and modification	0.751828	0.175487	0.0414871	0.174166	0.13038	3	0.140085	0.19361	0.186558	0.173418	3
OG1RF_10167_167	RplR	50S ribosomal protein L18	Cytoplasmic	Protein synthesis	Ribosomal proteins: synthesis and modification	0.754031	0.0914156	0.00999076	0.0773435	0.0595833	3	0.0557437	0.0739568	0.107358	0.0790196	3
OG1RF_10517_517	MetK	methionine adenosyltransferase	Cytoplasmic	Central intermediary metabolism	Other	0.756223	0.0646288	0.0534712	0.0608214	0.0596404	3	0.0853433	0.0887501	0.0625052	0.0788662	3
OG1RF_12030_2030	FibA	beta-lactam resistance factor	Cytoplasmic	cellular processes and signaling	Defense mechanisms	0.757967	0.00484224	0.00255987	0.00362757	0.00367656	3	0.00545073	0.00437149	0.00472944	0.00485056	3
OG1RF_10203_203	OG1RF_10203	heat shock protein	Unknown	information storage and processing	Translation, ribosomal structure and biogenesis	0.759725	0.00322905		0.00330831	0.00326868	2	0.00336341	0.00505225	0.00449171	0.00430245	3
OG1RF_10150_150	RpsJ	30S ribosomal protein S10	Cytoplasmic	Protein synthesis	Ribosomal proteins: synthesis and modification	0.760983	0.175634	0.0926307	0.209984	0.159416	3	0.223006	0.20572	0.199736	0.209487	3
OG1RF_11397_1397	OG1RF_11397	DegV family protein	Cytoplasmic	poorly characterized	General	0.763908	0.0184116	0.00940015	0.0144993	0.0141037	3	0.0164536	0.0173924	0.0215417	0.0184625	3
OG1RF_10630_630	Mvd	diphosphomevalonate decarboxylase	Unknown	Central intermediary metabolism	Other	0.766999	0.00150324	0.00303816	0.00173867	0.00209335	3	0.00209458	0.0026995	0.00339375	0.00272928	3
OG1RF_10737_737	Zwf	glucose-6-phosphate 1-dehydrogenase	Cytoplasmic	Energy metabolism	Pentose phosphate pathway	0.771055	0.0159965	0.0173941	0.0226689	0.0186865	3	0.0268254	0.0255515	0.0203279	0.0242349	3
OG1RF_11401_1401	RecJ	single-stranded-DNA-specific exonuclease RecJ	Cytoplasmic Membrane	DNA metabolism	DNA replication, recombination, and repair	0.77133	0.00248986	0.00170453	0.00201805	0.00207081	3	0.000966964	0.00217462	0.00491259	0.00268473	3
OG1RF_10954_954	LuxS	S-ribosylhomocysteine lyase	Cytoplasmic	cellular processes and signaling	Signal transduction mechanisms	0.775726	0.0915833	0.0592563	0.122445	0.091095	3	0.109124	0.120301	0.122871	0.117432	3
OG1RF_11433_1433	RluD	ribosomal large subunit pseudouridine synthase D	Cytoplasmic	Protein synthesis	tRNA and rRNA base modification	0.777878	0.00461424	0.00109559	0.00129321	0.00233435	3		0.0029208	0.00308104	0.00300092	2
OG1RF_12016_2016	OG1RF_12016	diacylglycerol kinase catalytic domain protein	Cytoplasmic	poorly characterized	Enzymes of unknown specificity	0.781129	0.0120128	0.0501313	0.0226698	0.0282713	3	0.0305356	0.0367011	0.041342	0.0361929	3
OG1RF_12186_2186	FabK	enoyl-(acyl-carrier-protein) reductase II	Cytoplasmic	Fatty acid and phospholipid metabolism	Biosynthesis	0.78376	0.00390535	0.00808731	0.00423543	0.00540936	3	0.00674758	0.00788893	0.00606891	0.00690181	3
OG1RF_11457_1457	Cap4C	UTP--glucose-1-phosphate uridylyltransferase	Cytoplasmic	Cell envelope	Biosynthesis and degradation of surface polysaccharides and lipopolysaccharides	0.784367	0.0513991	0.0123565	0.0377253	0.033827	3	0.043013	0.0440188	0.0423475	0.0431264	3
OG1RF_12125_2125	Tmk	thymidylate kinase	Cytoplasmic	Purines, pyrimidines, nucleosides, and nucleotides	Nucleotide and nucleoside interconversions	0.78465	0.00668174	0.00510508	0.00752419	0.00643701	3	0.00491742	0.00769024	0.0120033	0.00820367	3
OG1RF_12180_2180	AccC	acetyl-CoA carboxylase subunit A	Cytoplasmic	Fatty acid and phospholipid metabolism	Biosynthesis	0.785651	0.0390288	0.0215078	0.0507701	0.0371022	3	0.0462934	0.0408501	0.0545309	0.0472248	3
OG1RF_11744_1744	PepS	aminopeptidase PepS	Cytoplasmic	metabolism	Amino acid transport and metabolism	0.785697	0.0519277	0.0227423	0.0562168	0.0436289	3	0.0573133	0.0598805	0.0493931	0.0555289	3
OG1RF_12555_2555	OG1RF_12555	SDR family dehydrogenase	Cytoplasmic	metabolism	Lipid transport and metabolism	0.788361	0.0137042	0.00797407	0.0102291	0.0106358	3	0.0267184	0.00767427	0.00608035	0.013491	3
OG1RF_11289_1289	OG1RF_11289	DegV family protein	Cytoplasmic	poorly characterized	General	0.791293	0.0040526	0.00373099	0.00751365	0.00509908	3	0.00452792	0.00797559	0.00682844	0.00644398	3
OG1RF_10974_974	OG1RF_10974	protein of hypothetical function DUF965	Cytoplasmic	poorly characterized	Function unknown	0.792912	0.0296403	0.0067532	0.0278516	0.021415	3	0.0295883	0.0263627	0.0250732	0.0270081	3
OG1RF_11636_1636	RelA	GTP diphosphokinase	Cytoplasmic	Cellular processes	Adaptations to atypical conditions	0.79371	0.0051086	0.0071713	0.00620237	0.00616076	3	0.00408944	0.0042611	0.0149354	0.00776197	3
OG1RF_10629_629	OG1RF_10629	phosphomevalonate kinase	Cytoplasmic	Central intermediary metabolism	Other	0.797969	0.00333512	0.00149513	0.00268714	0.0025058	3	0.00161821	0.00392723	0.00387523	0.00314022	3
OG1RF_12007_2007	GroES	chaperone GroES	Cytoplasmic	Protein fate	Protein folding and stabilization	0.800214	0.0769776	0.0339701	0.0926501	0.0678659	3	0.111771	0.0805323	0.0621264	0.0848097	3
OG1RF_10351_351	NagB	glucosamine-6-phosphate deaminase	Cytoplasmic	Central intermediary metabolism	Amino sugars	0.80131	0.0116828	0.00405818	0.0110087	0.00891655	3	0.0110214	0.0110748	0.0112862	0.0111275	3
OG1RF_11732_1732	RmlB	dTDP glucose 4,6-dehydratase	Cytoplasmic	Cell envelope	Biosynthesis and degradation of surface polysaccharides and lipopolysaccharides	0.80213	0.0419825	0.0615609	0.0488393	0.0507943	3	0.0708422	0.0571589	0.0619715	0.0633242	3
OG1RF_12188_2188	FabH	beta-ketoacyl-acyl-carrier-protein synthase III	Cytoplasmic	Fatty acid and phospholipid metabolism	Biosynthesis	0.804741	0.0102757	0.00844945	0.0171474	0.0119575	3	0.0178043	0.0142572	0.012515	0.0148588	3
OG1RF_12248_2248	PtsB	PTS family porter, IIB component	Unknown	Transport and binding proteins	Carbohydrates, organic alcohols, and acids	0.806863	0.00660433		0.0108327	0.00871853	2	0.0114833	0.00971952	0.0112135	0.0108055	3
OG1RF_10338_338	Ohr	organic hydroperoxide resistance protein	Cytoplasmic	Cellular processes	Detoxification	0.808875	0.0989338		0.104784	0.101859	2	0.174125	0.10687	0.096786	0.125927	3
OG1RF_11040_1040	NusA	transcription termination factor NusA	Cytoplasmic	Transcription	Transcription factors	0.808972	0.0243856	0.009832	0.0258497	0.0200224	3	0.0189831	0.0298155	0.0254528	0.0247505	3
OG1RF_11506_1506	OG1RF_11506	putative lipoprotein	Unknown	poorly characterized	Function unknown	0.810398	0.00923107		0.00894563	0.00908835	2	0.0139185	0.0109434	0.00878216	0.0112147	0
OG1RF_10414_414	AlgC	phosphomannomutase	Cytoplasmic	metabolism	Carbohydrate transport and metabolism	0.811159	0.00770201	0.00306995	0.00743808	0.00607002	3	0.00605438	0.00932149	0.00707354	0.00748313	3
OG1RF_12390_2390	RpoZ	DNA-directed RNA polymerase subunit omega	Cytoplasmic	Transcription	DNA-dependent RNA polymerase	0.812814	0.0432932	0.0222134	0.0468433	0.03745	3	0.0472351	0.0414156	0.0495728	0.0460745	3
OG1RF_10133_133	DeoB	phosphopentomutase	Cytoplasmic	Purines, pyrimidines, nucleosides, and nucleotides	Other	0.813048	0.0827632	0.0268194	0.0641509	0.0579112	3	0.0754717	0.0706666	0.0675433	0.0712272	3
OG1RF_11044_1044	RbfA	ribosome-binding factor A	Cytoplasmic	Transcription	RNA processing	0.81335	0.0135568	0.019368	0.0202435	0.0177228	3	0.0246123	0.021623	0.0191342	0.0217898	3
OG1RF_12336_2336	Def	peptide deformylase	Unknown	Protein fate	Protein modification and repair	0.81474	0.0372804	0.0160685	0.0389728	0.0307739	3	0.0323458	0.0430635	0.037905	0.0377714	3
OG1RF_10208_208	Hpt	hypoxanthine phosphoribosyltransferase	Cytoplasmic	Purines, pyrimidines, nucleosides, and nucleotides	Salvage of nucleosides and nucleotides	0.815337	0.0176945	0.00482196	0.0158631	0.0127932	3	0.0107892	0.0146369	0.0216461	0.0156907	3
OG1RF_10598_598	QueA	S-adenosylmethionine:tRNA ribosyltransferase-isomerase	Cytoplasmic	Protein synthesis	tRNA and rRNA base modification	0.817143	0.00589008	0.00563706	0.00946418	0.00699711	3	0.00885586	0.00936359	0.00746925	0.0085629	3
OG1RF_11190_1190	OG1RF_11190	hypothetical protein	Cytoplasmic	poorly characterized	Function unknown	0.8178	0.0025415		0.00292884	0.00273517	2	0.00306032	0.00351895	0.00345438	0.00334455	0
OG1RF_11696_1696	GlmM	phosphoglucosamine mutase	Cytoplasmic	Cell envelope	Biosynthesis and degradation of murein sacculus and peptidoglycan	0.819059	0.0358453	0.0168018	0.0320021	0.0282164	3	0.0322106	0.0381237	0.0330149	0.0344497	3
OG1RF_10674_674	Ppx2	exopolyphosphatase	Cytoplasmic	poorly characterized	Enzymes of unknown specificity	0.819942	0.0208793	0.00409351	0.0140908	0.0130212	3	0.0102645	0.0191518	0.0182256	0.0158806	3
OG1RF_12086_2086	SdaAA	L-serine dehydratase	Cytoplasmic Membrane	Energy metabolism	Amino acids and amines	0.82009	0.00340423	0.00519586	0.00467454	0.00442488	3	0.00470504	0.00597452	0.00550724	0.0053956	3
OG1RF_10355_355	NrdF	ribonucleotide-diphosphate reductase subunit beta	Unknown	Purines, pyrimidines, nucleosides, and nucleotides	2'-Deoxyribonucleotide metabolism	0.820737	0.0118109	0.0104725	0.00488098	0.0090548	3	0.0134935	0.00991569	0.00968836	0.0110325	3
OG1RF_11167_1167	AlaS	alanine--tRNA ligase	Cytoplasmic	Protein synthesis	tRNA aminoacylation	0.823379	0.0628346	0.0564575	0.0593043	0.0595321	3	0.059763	0.0676716	0.0894721	0.0723022	3
OG1RF_10729_729	FtsA	cell division protein FtsA	Cytoplasmic	Cellular processes	Cell division	0.824072	0.0437284	0.072334	0.0352862	0.0504495	3	0.0640573	0.0581722	0.0614298	0.0612198	3
OG1RF_11327_1327	PpaC	inorganic diphosphatase	Cytoplasmic	metabolism	Energy production and conversion	0.828296	0.0362036	0.0525377	0.0551398	0.0479604	3	0.0679201	0.0545091	0.0512782	0.0579025	3
OG1RF_12041_2041	RelA2	GTP diphosphokinase	Cytoplasmic	poorly characterized	Function unknown	0.828928	0.0021475	0.0011639	0.00194684	0.00175274	3	0.00239946	0.00195191	0.00199204	0.00211447	3
OG1RF_10399_399	MurE	UDP-N-acetylmuramoyl-L-alanyl-D-glutamate--L-lysine ligase	Cytoplasmic	Cell envelope	Biosynthesis and degradation of murein sacculus and peptidoglycan	0.829063	0.00755394	0.00668015	0.00483969	0.00635793	3	0.0141412	0.00439588	0.00446938	0.00766881	3
OG1RF_12178_2178	AccA	acetyl-coA carboxylase carboxyl transferase subunit alpha	Cytoplasmic	Fatty acid and phospholipid metabolism	Biosynthesis	0.833362	0.0227418	0.00830684	0.0205419	0.0171969	3	0.0165142	0.0206109	0.0247816	0.0206355	3
OG1RF_10607_607	MutM	DNA-formamidopyrimidine glycosylase	Cytoplasmic	DNA metabolism	DNA replication, recombination, and repair	0.833945	0.00341144	0.00352057	0.00272269	0.00321824	3	0.00341617	0.00319355	0.00496742	0.00385905	3
OG1RF_11192_1192	MutS	DNA mismatch repair protein MutS	Cytoplasmic	DNA metabolism	Other	0.835228	0.00919813	0.00492502	0.00664547	0.00692287	3	0.00279665	0.0131285	0.00894067	0.0082886	3
OG1RF_10641_641	InfC	translation initiation factor IF3	Cytoplasmic	Protein synthesis	Translation factors	0.836394	0.0855559	0.015648	0.108654	0.0699525	3	0.0909551	0.0734467	0.0865058	0.0836359	3
OG1RF_12184_2184	FabG3	3-oxoacyl-[acyl-carrier-protein] reductase	Cytoplasmic	Fatty acid and phospholipid metabolism	Biosynthesis	0.837142	0.0109086	0.028833	0.0141016	0.0179478	3	0.0206675	0.0206027	0.0230478	0.0214393	3
OG1RF_12307_2307	OG1RF_12307	universal stress protein	Cytoplasmic	cellular processes and signaling	Signal transduction mechanisms	0.840201	0.0039739	0.00575199	0.00432432	0.0046834	3	0.00674193	0.00477397	0.00520654	0.00557415	3
OG1RF_10055_55	GlmU	UDP-N-acetylglucosamine diphosphorylase	Cytoplasmic	Cell envelope	Biosynthesis and degradation of murein sacculus and peptidoglycan	0.844242	0.0417735	0.0501361	0.047461	0.0464568	3	0.0491217	0.0606974	0.0552645	0.0550279	3
OG1RF_10287_287	Pcp	pyroglutamyl-peptidase I	Cytoplasmic	Protein fate	Degradation of proteins, peptides, and glycopeptides	0.847535	0.0376958	0.0397755	0.0396997	0.039057	3	0.0382345	0.0484569	0.0515578	0.0460831	3
OG1RF_10145_145	RpsG	30S ribosomal protein S7	Cytoplasmic	Protein synthesis	Ribosomal proteins: synthesis and modification	0.847915	0.145693	0.266964	0.233774	0.215477	3	0.24656	0.268956	0.246862	0.254126	3
OG1RF_11285_1285	AroA	3-phosphoshikimate 1-carboxyvinyltransferase	Cytoplasmic	Amino acid biosynthesis	Aromatic amino acid family	0.848222	0.0102179	0.00793598	0.00829269	0.00881553	3	0.0085052	0.00727512	0.0153985	0.0103929	3
OG1RF_11725_1725	OG1RF_11725	group 2 glycosyl transferase	Cytoplasmic Membrane	Cell envelope	Biosynthesis and degradation of surface polysaccharides and lipopolysaccharides	0.849314	0.00529153	0.0056423	0.00582679	0.00558687	3	0.00579451	0.00692254	0.00701727	0.0065781	3
OG1RF_10634_634	OppA	oligopeptide ABC superfamily ATP binding cassette transporter, binding protein	Cellwall	Transport and binding proteins	Amino acids, peptides and amines	0.85338	0.0315159	0.036924	0.0255178	0.0313192	3	0.0291637	0.0388259	0.042111	0.0367002	3
OG1RF_12550_2550	OG1RF_12550	PTS family glucitol (glu) porter component IIA	Unknown	metabolism	Carbohydrate transport and metabolism	0.853488	0.00313173		0.00408436	0.00360805	2	0.0057787	0.00291204	0.00399149	0.00422741	3
OG1RF_10759_759	OG1RF_10759	protein of hypothetical function DUF299	Cytoplasmic	poorly characterized	Function unknown	0.854078	0.00371659	0.00202158	0.00370344	0.00314721	3	0.00288974	0.00546477	0.00270023	0.00368492	3
OG1RF_10962_962	OG1RF_10962	hypothetical protein	Cytoplasmic	poorly characterized	Function unknown	0.854956	0.00263666		0.0011597	0.00189818	2	0.00141865	0.00289645	0.00234553	0.00222021	0
OG1RF_11799_1799	OG1RF_11799	TIM-barrel fold family protein	Unknown	poorly characterized	Function unknown	0.855545	0.00253856		0.00164394	0.00209125	2		0.00315089	0.00173781	0.00244435	2
OG1RF_12159_2159	ThrS	threonine--tRNA ligase	Cytoplasmic	Protein synthesis	tRNA aminoacylation	0.857896	0.0174627	0.00860204	0.0207492	0.0156046	3	0.0193333	0.0215559	0.0136791	0.0181894	3
OG1RF_12026_2026	OG1RF_12026	alcohol dehydrogenase	Cytoplasmic	poorly characterized	Enzymes of unknown specificity	0.859272	0.00103084	0.00289409	0.00391702	0.00261398	3	0.00365737	0.00205317	0.00341573	0.00304209	3
OG1RF_11165_1165	OG1RF_11165	DEAD/DEAH box family ATP-dependent RNA helicase	Cytoplasmic	DNA metabolism	DNA replication, recombination, and repair	0.859678	0.00962144	0.00435392	0.00764932	0.00720823	3	0.00683969	0.00693068	0.011384	0.00838479	3
OG1RF_11662_1662	OG1RF_11662	putative trans-hexaprenyltranstransferase	Cytoplasmic	metabolism	Coenzyme transport and metabolism	0.860123	0.00409426		0.00281539	0.00345482	2	0.00269663	0.00368059	0.00567277	0.00401666	0
OG1RF_10717_717	ArgR3	arginine repressor	Cytoplasmic	information storage and processing	Transcription	0.861921	0.00242898		0.00291077	0.00266988	2	0.00346337	0.00144158	0.00438782	0.00309759	3
OG1RF_10344_344	MurQ	N-acetylmuramic acid 6-phosphate etherase	Cytoplasmic	Cell envelope	Biosynthesis and degradation of murein sacculus and peptidoglycan	0.86288	0.00101645		0.00133865	0.00117755	2	0.000666391	0.00131023	0.00211739	0.00136467	3
OG1RF_10593_593	OpuCC	glycine/betaine/carnitine/choline ABC superfamily ATP binding cassette transporter, binding protein	Cytoplasmic Membrane	Transport and binding proteins	Amino acids, peptides and amines	0.863016	0.00442651	0.00292479	0.00197221	0.00310784	3	0.00372136	0.00368102	0.00340101	0.00360113	3
OG1RF_10178_178	RplQ	50S ribosomal protein L17	Cytoplasmic	Protein synthesis	Ribosomal proteins: synthesis and modification	0.863231	0.0901246	0.0897052	0.070321	0.0833836	3	0.118955	0.0885072	0.0823222	0.0965948	3
OG1RF_12044_2044	PepF	oligoendopeptidase F	Cytoplasmic	Protein fate	Degradation of proteins, peptides, and glycopeptides	0.864185	0.032698	0.00722937	0.0241962	0.0213745	3	0.0247445	0.0227543	0.0267024	0.0247337	3
OG1RF_10595_595	OpuAA	glycine betaine/L-proline ABC superfamily ATP binding cassette transporter, ABC protein	Cytoplasmic Membrane	Transport and binding proteins	Amino acids, peptides and amines	0.864438	0.00737281	0.00427118	0.00851347	0.00671916	3	0.00465693	0.00716801	0.0114936	0.00777286	3
OG1RF_11920_1920	ArsC	arsenate reductase	Cytoplasmic Membrane	Regulatory functions	DNA interactions	0.867118	0.00453959	0.00142361	0.00501625	0.00365982	3	0.00400266	0.00520095	0.00345839	0.00422067	3
OG1RF_11267_1267	RpsA	30S ribosomal protein S1	Cytoplasmic	Protein synthesis	Ribosomal proteins: synthesis and modification	0.867594	0.140927	0.0966383	0.136996	0.124854	3	0.148607	0.143416	0.139701	0.143908	3
OG1RF_12197_2197	OG1RF_12197	putative cystathionine beta-lyase	Cytoplasmic	metabolism	Amino acid transport and metabolism	0.867606	0.00410974		0.00448728	0.00429851	2	0.00460451	0.00423247	0.00602638	0.00495445	3
OG1RF_12124_2124	OG1RF_12124	protein of hypothetical function DUF970	Cytoplasmic	poorly characterized	Function unknown	0.872207	0.0239488	0.0107937	0.0211428	0.0186285	3	0.0204594	0.0230878	0.0205263	0.0213579	3
OG1RF_12092_2092	NusG	transcription termination/antitermination factor NusG	Cytoplasmic	Transcription	Transcription factors	0.873399	0.0159566	0.0130887	0.0191174	0.0160543	3	0.0192458	0.0199488	0.0159494	0.0183813	3
OG1RF_11612_1612	OG1RF_11612	phosphosugar-binding protein	Cytoplasmic	Cell envelope	Biosynthesis and degradation of surface polysaccharides and lipopolysaccharides	0.873755	0.00570559	0.00403613	0.00689341	0.00554504	3	0.008452	0.00734106	0.00324559	0.00634622	3
OG1RF_11938_1938	OG1RF_11938	fumarate reductase	Unknown	Energy metabolism	Electron transport	0.875188	0.0327712	0.0240665	0.0385567	0.0317981	3	0.0281587	0.032508	0.048332	0.0363329	3
OG1RF_10370_370	OG1RF_10370	hypothetical protein	Unknown	poorly characterized	Function unknown	0.875445	0.0116093		0.0134219	0.0125156	2	0.0145714	0.0139238	0.0143936	0.0142963	3
OG1RF_12364_2364	Smc	cell division protein Smc	Cytoplasmic	Cellular processes	Cell division	0.877296	0.0055575	0.008742	0.00735724	0.00721891	3	0.0135606	0.00575167	0.00537355	0.00822859	3
OG1RF_12225_2225	CspA3	cold shock protein CspA	Cytoplasmic	information storage and processing	Transcription	0.877568	0.0810802	0.31727	0.0887852	0.162379	3	0.246309	0.152232	0.156556	0.185032	3
OG1RF_10121_121	Pdp	pyrimidine-nucleoside phosphorylase	Cytoplasmic	Purines, pyrimidines, nucleosides, and nucleotides	Other	0.880877	0.0118734	0.00525345	0.0104328	0.00918653	3	0.0111765	0.0101318	0.00997815	0.0104288	3
OG1RF_11624_1624	TpiA	triose-phosphate isomerase	Cytoplasmic	Energy metabolism	Glycolysis/gluconeogenesis	0.884794	0.141837	0.131094	0.158548	0.143826	3	0.207113	0.125578	0.15497	0.162553	3
OG1RF_11902_1902	ArgS	arginine--tRNA ligase	Cytoplasmic	Protein synthesis	tRNA aminoacylation	0.885554	0.0333899	0.0292672	0.0422728	0.0349766	3	0.0440429	0.0405264	0.0339213	0.0394969	3
OG1RF_12438_2438	YmdA	2',3'-cyclic-nucleotide 2'-phosphodiesterase	Cytoplasmic	Transcription	Degradation of RNA	0.886843	0.00666519	0.00137418	0.00469348	0.00424428	3	0.00329312	0.00616375	0.00490063	0.00478584	3
OG1RF_10044_44	CysS	cysteine--tRNA ligase	Cytoplasmic	Protein synthesis	tRNA aminoacylation	0.893227	0.0186406	0.006657	0.0166134	0.0139703	3	0.0128895	0.017636	0.0163954	0.0156403	3
OG1RF_12095_2095	OG1RF_12095	CBS domain protein	Unknown	poorly characterized	General function prediction only	0.893887	0.0330702	0.0381156	0.0241951	0.0317936	3	0.0290134	0.0372903	0.0403998	0.0355678	3
OG1RF_11579_1579	OG1RF_11579	hypothetical protein	Cytoplasmic	poorly characterized	Function unknown	0.894242	0.00276608		0.00285199	0.00280904	2	0.00442678	0.00206749	0.00292948	0.00314125	0
OG1RF_11842_1842	Era	GTP-binding protein Era	Cytoplasmic Membrane	Protein synthesis	Other	0.894567	0.00829334	0.00289376	0.00907885	0.00675532	3	0.00672717	0.00768392	0.00824339	0.00755149	3
OG1RF_10115_115	GuaA	GMP synthase (glutamine-hydrolyzing)	Cytoplasmic	Purines, pyrimidines, nucleosides, and nucleotides	Purine ribonucleotide biosynthesis	0.895744	0.0600116	0.0936995	0.0700961	0.0746024	3	0.0899221	0.0776888	0.0822454	0.0832854	3
OG1RF_10158_158	RplP	50S ribosomal protein L16	Cytoplasmic	Protein synthesis	Ribosomal proteins: synthesis and modification	0.896455	0.0840342	0.104685	0.108856	0.0991917	3	0.102619	0.120859	0.108468	0.110649	3
OG1RF_10751_751	LacF	PTS family lactose/cellobiose porter component IIA	Cytoplasmic	Energy metabolism	Biosynthesis and degradation of polysaccharides	0.896721	0.00167633		0.00125861	0.00146747	2	0.00178479	0.00194866	0.001176	0.00163648	3
OG1RF_11611_1611	OG1RF_11611	phosphosugar isomerase	Cytoplasmic	Cell envelope	Biosynthesis and degradation of surface polysaccharides and lipopolysaccharides	0.897628	0.0119651	0.0132866	0.0149542	0.013402	3	0.0212266	0.0198889	0.00367578	0.0149304	3
OG1RF_11411_1411	Ffh	signal recognition particle protein	Cytoplasmic Membrane	Protein fate	Protein and peptide secretion and trafficking	0.898426	0.0231024	0.0225122	0.00219343	0.015936	3	0.0128579	0.0171592	0.0231959	0.0177377	3
OG1RF_10157_157	RpsC	30S ribosomal protein S3	Cytoplasmic	Protein synthesis	Ribosomal proteins: synthesis and modification	0.900136	0.155235	0.198547	0.133759	0.162513	3	0.1714	0.196897	0.173333	0.180543	3
OG1RF_12397_2397	Eda	2-dehydro-3-deoxyphosphogluconate aldolase/4-hydroxy-2-oxoglutarate aldolase	Cytoplasmic	Amino acid biosynthesis	Glutamate family	0.901676	0.00273308		0.00214099	0.00243703	2	0.00293536	0.00345559	0.00171739	0.00270278	3
OG1RF_10501_501	OG1RF_10501	protein of hypothetical function UPF0052 and CofD	Unknown	poorly characterized	Conserved	0.902004	0.00381068	0.00236985	0.00675959	0.00431338	3	0.00189787	0.00723175	0.00521635	0.00478199	3
OG1RF_10444_444	ClpE	ATP-dependent Clp protease	Cytoplasmic	Protein fate	Degradation of proteins, peptides, and glycopeptides	0.903148	0.0276861	0.0295773	0.0319944	0.0297526	3	0.0288612	0.0317876	0.038181	0.0329433	3
OG1RF_10893_893	PheS	phenylalanyl-tRNA synthetase alpha subunit	Cytoplasmic	Protein synthesis	tRNA aminoacylation	0.903281	0.0206599	0.00594499	0.0205887	0.0157312	3	0.0165495	0.0182355	0.0174619	0.0174156	3
OG1RF_10783_783	OG1RF_10783	response regulator	Cytoplasmic	cellular processes and signaling	Signal transduction mechanisms	0.903344	0.0352966	0.0139373	0.0329491	0.0273943	3	0.030071	0.0311702	0.0297353	0.0303255	3
OG1RF_10465_465	RumA	23S rRNA (uracil-5-)-methyltransferase	Cytoplasmic	Protein synthesis	tRNA and rRNA base modification	0.903536	0.0058259	0.0059989	0.00803277	0.00661919	3	0.00528723	0.00874403	0.00794636	0.00732587	3
OG1RF_12183_2183	FabF2	beta-ketoacyl-acyl-carrier-protein synthase II	Cytoplasmic Membrane	Fatty acid and phospholipid metabolism	Biosynthesis	0.904788	0.039761	0.0344801	0.036619	0.0369534	3	0.0406822	0.042646	0.0391978	0.040842	3
OG1RF_10889_889	LepB	signal peptidase I LepB	Cellwall	Protein fate	Protein and peptide secretion and trafficking	0.90542	0.0017722		0.0031701	0.00247115	2	0.00329325	0.00223385	0.00266076	0.00272929	3
OG1RF_11361_1361	TrmFO	tRNA:M(5)U-54 methyltransferase	Cytoplasmic	Protein synthesis	tRNA and rRNA base modification	0.906502	0.0128965	0.015971	0.0161608	0.0150094	3	0.0194901	0.0178677	0.0123149	0.0165575	3
OG1RF_11474_1474	PrfB	peptide chain release factor RF2	Cytoplasmic	Protein synthesis	Translation factors	0.907404	0.00174484		0.0023219	0.00203337	2	0.00113364	0.0024153	0.00317366	0.00224087	0
OG1RF_10103_103	OG1RF_10103	UIT3 family protein	Cytoplasmic Membrane	poorly characterized	Function unknown	0.908278	0.0135417	0.0162512	0.0124552	0.0140827	3	0.0172589	0.0163994	0.0128562	0.0155048	3
OG1RF_11847_1847	OG1RF_11847	GatB/Yqey family protein	Cytoplasmic	poorly characterized	Function unknown	0.908365	0.0450529	0.00832007	0.0297425	0.0277052	3	0.0227899	0.0314989	0.0372114	0.0305	3
OG1RF_11254_1254	OG1RF_11254	outer surface protein	Cytoplasmic	poorly characterized	Function unknown	0.909832	0.00983581	0.00508975	0.00753316	0.00748624	3	0.00746662	0.0111126	0.00610524	0.00822816	3
OG1RF_10605_605	OG1RF_10605	aldo/keto reductase 2 family oxidoreductase	Cytoplasmic	poorly characterized	General function prediction only	0.909933	0.0173495	0.00675901	0.0139593	0.0126893	3	0.014082	0.0129829	0.0147711	0.0139453	3
OG1RF_11282_1282	AroB	3-dehydroquinate synthase	Cytoplasmic	Amino acid biosynthesis	Aromatic amino acid family	0.910409	0.00873223	0.00858165	0.00952541	0.00894643	3	0.00688307	0.00759268	0.0150047	0.00982683	3
OG1RF_10144_144	RpsL	30S ribosomal protein S12	Cytoplasmic	Protein synthesis	Ribosomal proteins: synthesis and modification	0.910788	0.141847	0.00719316	0.0743754	0.0744718	3	0.08475	0.0692075	0.0913414	0.0817663	3
OG1RF_10333_333	MenD	2-succinyl-5-enolpyruvyl-6-hydroxy-3-cyclohexene-1-carboxylate synthase	Cytoplasmic Membrane	Biosynthesis of cofactors, prosthetic groups, and carriers	Menaquinone and ubiquinone	0.911137	0.00283324		0.00662246	0.00472785	2	0.00365185	0.00551365	0.00640138	0.00518896	3
OG1RF_11383_1383	CryZ	putative NADPH:quinone reductase	Cytoplasmic	metabolism	Energy production and conversion	0.918161		0.00832559	0.00879867	0.00856213	2	0.0103247	0.00891442	0.00873678	0.0093253	0
OG1RF_11271_1271	OG1RF_11271	tetratricopeptide repeat family protein	Cytoplasmic	metabolism	Carbohydrate transport and metabolism	0.92345	0.00441024	0.00471558	0.00298057	0.00403546	3	0.00262584	0.00718108	0.00330304	0.00436999	3
OG1RF_10356_356	NrdE	ribonucleotide-diphosphate reductase subunit alpha	Unknown	metabolism	Nucleotide transport and metabolism	0.927605	0.0255241	0.0220373	0.0333997	0.0269871	3	0.0320549	0.0318017	0.0234232	0.0290933	3
OG1RF_11833_1833	RpsB	30S ribosomal protein S2	Cytoplasmic	Protein synthesis	Ribosomal proteins: synthesis and modification	0.929101	0.252443	0.145958	0.237279	0.211893	3	0.193741	0.234496	0.255951	0.228063	3
OG1RF_10163_163	RplE	50S ribosomal protein L5	Cytoplasmic	Protein synthesis	Ribosomal proteins: synthesis and modification	0.92932	0.183946	0.227709	0.153805	0.188487	3	0.232658	0.189455	0.186354	0.202822	3
OG1RF_10134_134	DeoD	purine-nucleoside phosphorylase	Cytoplasmic	Purines, pyrimidines, nucleosides, and nucleotides	Other	0.929851	0.0267892	0.024395	0.0145425	0.0219089	3	0.0184377	0.0265705	0.025677	0.0235617	3
OG1RF_11580_1580	YsxC	ribosome biogenesis GTP-binding protein YsxC	Cytoplasmic	Protein synthesis	Other	0.93014	0.00153544		0.00165896	0.0015972	2	0.00169638	0.000594931	0.00286016	0.00171716	0
OG1RF_10166_166	RplF	50S ribosomal protein L6	Unknown	Protein synthesis	Ribosomal proteins: synthesis and modification	0.931361	0.273251	0.188848	0.245412	0.235837	3	0.210781	0.251462	0.29741	0.253217	3
OG1RF_10735_735	DivIVA	cell division protein DivIVA	Cytoplasmic	Cellular processes	Cell division	0.933012	0.0717343	0.0856627	0.0708523	0.0760831	3	0.0719026	0.0860932	0.0866414	0.0815457	3
OG1RF_11302_1302	AmiD3	N-acetylmuramoyl-L-alanine amidase	Extracellular	Cell envelope	Surface structures	0.933511	0.0015939		0.0018377	0.0017158	2	0.00173683	0.00193919		0.00183801	2
OG1RF_10637_637	OppC	oligopeptide ABC superfamily ATP binding cassette transporter, membrane protein	Cytoplasmic Membrane	Transport and binding proteins	Amino acids, peptides and amines	0.935248	0.00748825	0.00647564	0.00400793	0.0059906	3	0.00689208	0.00654439	0.00577963	0.00640537	3
OG1RF_10477_477	OG1RF_10477	transposase	Cytoplasmic	poorly characterized	Function unknown	0.938194	0.0140739	0.00594035	0.0130115	0.0110086	3	0.0112399	0.0127192	0.0112423	0.0117338	3
OG1RF_12556_2556	GidA	tRNA uridine 5-carboxymethylaminomethyl modification enzyme GidA	Cytoplasmic	Protein synthesis	tRNA and rRNA base modification	0.938865	0.00504745	0.00333815	0.00562258	0.00466939	3	0.00518617	0.00438413	0.00535002	0.00497344	3
OG1RF_10116_116	CoaA	pantothenate kinase	Cytoplasmic	Biosynthesis of cofactors, prosthetic groups, and carriers	Pantothenate and coenzyme A	0.939678	0.00215871		0.00113375	0.00164623	2	0.000665369	0.00252743	0.00206292	0.00175191	3
OG1RF_10142_142	OG1RF_10142	resolvase family site-specific recombinase	Cytoplasmic	DNA metabolism	DNA replication, recombination, and repair	0.940476	0.00165952		0.00112496	0.00139224	2	0.000531897	0.00142177	0.00248741	0.00148036	3
OG1RF_11359_1359	HslV	ATP-dependent protease HslVU	Cytoplasmic	Protein fate	Degradation of proteins, peptides, and glycopeptides	0.943334	0.0079619	0.00333706	0.0105659	0.00728828	3	0.0066209	0.00584999	0.0107074	0.00772609	3
OG1RF_12420_2420	MscL	large conductance mechanosensitive channel protein	Cytoplasmic Membrane	Cellular processes	Adaptations to atypical conditions	0.944479	0.0188689	0.00165681	0.0220903	0.0142053	3	0.0161347	0.0142651	0.0147213	0.0150404	3
OG1RF_11983_1983	MurA2	UDP-N-acetylglucosamine 1-carboxyvinyltransferase	Cytoplasmic	Cell envelope	Biosynthesis and degradation of murein sacculus and peptidoglycan	0.945503	0.00657875	0.00341337	0.00226131	0.00408448	3	0.00319838	0.00401822	0.00574308	0.0043199	3
OG1RF_10920_920	OG1RF_10920	HD domain protein	Cytoplasmic	poorly characterized	General function prediction only	0.946621	0.00316971	0.00716564	0.00237284	0.00423606	3	0.00816756	0.00110828	0.00414895	0.00447493	3
OG1RF_10176_176	RpsK	30S ribosomal protein S11	Cytoplasmic	Protein synthesis	Ribosomal proteins: synthesis and modification	0.947123	0.0852637	0.10007	0.0920622	0.0924653	3	0.109092	0.0971401	0.0866502	0.0976275	3
OG1RF_11740_1740	Map2	M24 family methionyl aminopeptidase	Cytoplasmic	Protein fate	Protein modification and repair	0.947232	0.0203465	0.0136549	0.0234367	0.019146	3	0.0147634	0.0238341	0.0220403	0.0202126	3
OG1RF_11407_1407	RpsP	30S ribosomal protein S16	Cytoplasmic	Protein synthesis	Ribosomal proteins: synthesis and modification	0.947956	0.13968	0.124843	0.171911	0.145478	3	0.169156	0.127502	0.163737	0.153465	3
OG1RF_10257_257	EzrA	septation ring formation regulator EzrA	Cytoplasmic Membrane	Cellular processes	Cell division	0.948595	0.0130041	0.00936656	0.00543486	0.00926849	3	0.00790801	0.00865716	0.0127471	0.00977076	3
OG1RF_11299_1299	OG1RF_11299	protein of hypothetical function DUF896	Cytoplasmic	poorly characterized	Function unknown	0.949852	0.00607862		0.00536346	0.00572104	2	0.00520117	0.00543735	0.00743073	0.00602308	0
OG1RF_10177_177	RpoA	DNA-directed RNA polymerase subunit alpha	Cytoplasmic	Transcription	DNA-dependent RNA polymerase	0.949891	0.100756	0.039887	0.114427	0.0850235	3	0.0888504	0.0955083	0.0841672	0.0895086	3
OG1RF_10151_151	RplC	50S ribosomal protein L3	Cytoplasmic	Protein synthesis	Ribosomal proteins: synthesis and modification	0.953209	0.195264	0.187568	0.162901	0.181911	3	0.197357	0.179273	0.195891	0.19084	3
OG1RF_11734_1734	RmlA	glucose-1-phosphate thymidylyltransferase	Cytoplasmic	Cell envelope	Biosynthesis and degradation of surface polysaccharides and lipopolysaccharides	0.954142	0.0241524	0.0118464	0.0209159	0.0189715	3	0.0205826	0.0188784	0.0201891	0.0198833	3
OG1RF_11853_1853	Hom	homoserine dehydrogenase	Cytoplasmic	metabolism	Amino acid transport and metabolism	0.955727	0.00336396	0.00110744	0.00206057	0.00217732	3	0.0026686	0.00222319	0.00194277	0.00227819	3
OG1RF_12217_2217	MnaA	UDP-N-acetylglucosamine 2-epimerase	Cytoplasmic	Cell envelope	Biosynthesis and degradation of surface polysaccharides and lipopolysaccharides	0.955982	0.0018301		0.00361229	0.0027212	2	0.00273125	0.00271201	0.00309622	0.00284649	3
OG1RF_11805_1805	AsnS	asparagine--tRNA ligase	Cytoplasmic	Protein synthesis	tRNA aminoacylation	0.956524	0.0441284	0.0231157	0.0453518	0.037532	3	0.0359079	0.0376801	0.0441257	0.0392379	3
OG1RF_11281_1281	AroF	phospho-2-dehydro-3-deoxyheptonate aldolase	Cytoplasmic	Amino acid biosynthesis	Aromatic amino acid family	0.957537	0.0261147	0.0258133	0.0219787	0.0246356	3	0.015732	0.0180975	0.0433547	0.0257281	3
OG1RF_10019_19	ManX2	PTS family mannose porter, IIAB component	Cytoplasmic	Transport and binding proteins	Carbohydrates, organic alcohols, and acids	0.959799	0.0591338	0.106519	0.0619524	0.0758683	3	0.0801906	0.0710371	0.0859105	0.0790461	3
OG1RF_10330_330	MenB	naphthoate synthase	Cytoplasmic	Biosynthesis of cofactors, prosthetic groups, and carriers	Menaquinone and ubiquinone	0.960083	0.0373744	0.0120793	0.0477199	0.0323912	3	0.0323085	0.0348365	0.0340688	0.0337379	3
OG1RF_11266_1266	Cmk	cytidylate kinase	Cytoplasmic	Purines, pyrimidines, nucleosides, and nucleotides	Nucleotide and nucleoside interconversions	0.964967	0.0131009	0.0020103	0.0128491	0.00932009	3	0.00871222	0.0110691	0.00919401	0.00965846	3
OG1RF_10576_576	SrmB	ATP-dependent RNA helicase DeaD	Cytoplasmic	DNA metabolism	DNA replication, recombination, and repair	0.965298	0.0297133	0.0343207	0.0290055	0.0310131	3	0.0335412	0.0292372	0.0336058	0.0321281	3
OG1RF_10402_402	PepV	dipeptidase PepV	Cytoplasmic	Protein fate	Degradation of proteins, peptides, and glycopeptides	0.967383	0.0702242	0.0474113	0.0801114	0.0659156	3	0.0659849	0.0720785	0.0663508	0.0681381	3
OG1RF_10429_429	TrmB	tRNA (guanine-N(7)-)-methyltransferase	Cytoplasmic	Protein synthesis	tRNA and rRNA base modification	0.969918	0.00830048	0.00518721	0.00815422	0.00721397	3	0.00745702	0.00577637	0.00907974	0.00743771	3
OG1RF_11477_1477	YfiA	ribosomal subunit interface protein	Cytoplasmic	Protein synthesis	Translation factors	0.970293	0.0924472	0.187261	0.0791256	0.119611	3	0.124832	0.142199	0.102788	0.123273	3
OG1RF_10666_666	MgsA	methylglyoxal synthase	Cytoplasmic	Energy metabolism	Other	0.970509	0.00637393		0.00747122	0.00692258	2	0.00759299	0.00551602	0.00828979	0.00713293	3
OG1RF_12006_2006	GroEL	chaperonin GroEL	Cytoplasmic	Protein fate	Protein folding and stabilization	0.973511	0.224228	0.206255	0.207305	0.212596	3	0.22477	0.22945	0.200924	0.218381	3
OG1RF_10924_924	PyrG	CTP synthase	Cytoplasmic	Purines, pyrimidines, nucleosides, and nucleotides	Pyrimidine ribonucleotide biosynthesis	0.975392	0.0483586	0.0496486	0.0500964	0.0493679	3	0.0669496	0.0396897	0.0452009	0.0506134	3
OG1RF_11128_1128	TrxB	thioredoxin-disulfide reductase	Cytoplasmic	Energy metabolism	Electron transport	0.975555	0.00965806	0.0231857	0.0122187	0.0150208	3	0.0169911	0.0150733	0.0141272	0.0153972	3
OG1RF_11963_1963	OG1RF_11963	putative transcriptional regulator	Cytoplasmic	poorly characterized	Function unknown	0.97568	0.00797347		0.00806491	0.00801919	2	0.00726904	0.00802112	0.00936706	0.00821907	3
OG1RF_11085_1085	AspC	aspartate aminotransferase	Cytoplasmic	metabolism	Amino acid transport and metabolism	0.978771	0.00864773	0.00522153	0.00631233	0.0067272	3	0.00666305	0.00576432	0.00819194	0.0068731	3
OG1RF_10007_7	RpsF	30S ribosomal protein S6	Cytoplasmic	Protein synthesis	Ribosomal proteins: synthesis and modification	0.979838	0.152525	0.14416	0.168519	0.155068	3	0.171667	0.170118	0.132991	0.158259	3
OG1RF_11818_1818	ProS	proline--tRNA ligase	Cytoplasmic	Protein synthesis	tRNA aminoacylation	0.980996	0.0349861	0.0254075	0.0392865	0.0332267	3	0.0342723	0.0360453	0.0312936	0.0338704	3
OG1RF_11214_1214	AtpB	proton (H+) or sodium (Na+) translocating V-type ATPase (V-ATPase), subunit B	Cytoplasmic	Energy metabolism	ATP-proton motive force interconversion	0.982938	0.0078983	0.003381	0.00965825	0.00697918	3	0.00663388	0.00510561	0.0095615	0.00710033	3
OG1RF_11830_1830	Frr	ribosome recycling factor	Cytoplasmic	Protein synthesis	Translation factors	0.983428	0.138852	0.0299343	0.12978	0.0995222	3	0.081014	0.100559	0.122025	0.101199	3
OG1RF_12541_2541	YchF	GTP-binding protein YchF	Cytoplasmic	poorly characterized	General	0.983852	0.0283519	0.0193478	0.0312051	0.0263016	3	0.0277255	0.02533	0.0271444	0.0267333	3
OG1RF_12530_2530	ClpC	ATPase/chaperone ClpC, probable specificity factor for ClpP protease	Cytoplasmic	Protein fate	Degradation of proteins, peptides, and glycopeptides	0.984454	0.00798475	0.00508048	0.0120571	0.00837412	3	0.00796077	0.00907528	0.00848304	0.00850636	3
OG1RF_12173_2173	OG1RF_12173	HD domain protein	Cytoplasmic	poorly characterized	Enzymes of unknown specificity	0.985108	0.00502662	0.00271196	0.00287804	0.00353888	3	0.00517687	0.00202809	0.00357216	0.00359237	3
OG1RF_10738_738	SirR	iron-dependent repressor	Cytoplasmic	information storage and processing	Transcription	0.985132	0.00254519		0.00621691	0.00438105	2	0.00377315	0.00527408	0.00429428	0.00444717	3
OG1RF_11405_1405	OG1RF_11405	hypothetical protein	Unknown	poorly characterized	Function unknown	0.985632	0.0255722	0.00551645	0.0253467	0.0188118	3	0.0160588	0.018882	0.0223172	0.019086	3
OG1RF_10983_983	Npr	NADH peroxidase	Cytoplasmic	poorly characterized	General function prediction only	0.99665	0.113994	0.192682	0.135064	0.147247	3	0.179389	0.133453	0.130383	0.147742	3
OG1RF_10154_154	RplB	50S ribosomal protein L2	Unknown	Protein synthesis	Ribosomal proteins: synthesis and modification	0.997609	0.25842	0.18057	0.220524	0.219838	3	0.198634	0.225519	0.236941	0.220365	3
OG1RF_10418_418	OG1RF_10418	hypothetical protein	Unknown	poorly characterized	Function unknown	0.999945	0.0931463	0.0235037	0.111569	0.0760729	3	0.0878519	0.0654302	0.0749491	0.0760771	3
OG1RF_11749_1749	OG1RF_11749	hypothetical protein	Unknown	poorly characterized	Function unknown	1.00104	0.00641218		0.00885069	0.00763143	2	0.00807596	0.00717105		0.0076235	2
OG1RF_11761_1761	OG1RF_11761	ABC superfamily ATP binding cassette transporter, binding protein	Unknown	metabolism	Carbohydrate transport and metabolism	1.00123	0.0961346	0.0845617	0.112533	0.0977431	3	0.113726	0.0884925	0.0906503	0.097623	3
OG1RF_11968_1968	Pmi	mannose-6-phosphate isomerase	Cytoplasmic	Energy metabolism	Sugars	1.0017	0.0242797	0.022402	0.026511	0.0243976	3	0.0271373	0.0257875	0.020144	0.0243563	3
OG1RF_11802_1802	OG1RF_11802	hypothetical protein	Cytoplasmic	poorly characterized	Function unknown	1.00191	0.00271459	0.00957558	0.0037772	0.00535579	3	0.00689033	0.00394933	0.005197	0.00534555	3
OG1RF_11226_1226	YitW	N-6 adenine-specific DNA methylase YitW	Cytoplasmic	poorly characterized	General function prediction only	1.00352	0.00220658		0.00532661	0.00376659	2	0.00431956	0.00514327	0.00179736	0.0037534	0
OG1RF_11582_1582	OG1RF_11582	6-phosphogluconolactonase	Cytoplasmic	metabolism	Carbohydrate transport and metabolism	1.00455	0.0365308	0.0318696	0.0402372	0.0362125	3	0.0413055	0.0402377	0.026602	0.0360484	3
OG1RF_11269_1269	Hup	DNA-binding protein HU	Cytoplasmic	DNA metabolism	DNA replication, recombination, and repair	1.00634	0.225341	0.611351	0.249754	0.362148	3	0.237802	0.424611	0.417187	0.359867	3
OG1RF_11906_1906	YeaZ	universal bacterial protein YeaZ	Cytoplasmic	Protein synthesis	tRNA and rRNA base modification	1.0074	0.00280384		0.00196163	0.00238273	2	0.00257854	0.00201522	0.00250195	0.00236524	3
OG1RF_10665_665	OG1RF_10665	ABC superfamily ATP binding cassette transporter, ABC protein	Cytoplasmic Membrane	metabolism	Carbohydrate transport and metabolism	1.00835	0.0202231	0.0219697	0.0254567	0.0225499	3	0.0223751	0.0223743	0.0223399	0.0223631	3
OG1RF_10483_483	OG1RF_10483	rhodanese family protein	Cytoplasmic	poorly characterized	General function prediction only	1.00852	0.0041741		0.00628573	0.00522991	2	0.00338492	0.00481511	0.00735713	0.00518572	3
OG1RF_10168_168	RpsE	30S ribosomal protein S5	Cytoplasmic	Protein synthesis	Ribosomal proteins: synthesis and modification	1.00893	0.219828	0.300175	0.241778	0.253927	3	0.233015	0.248526	0.273499	0.25168	3
OG1RF_12012_2012	OG1RF_12012	GntR family transcriptional regulator	Cytoplasmic	metabolism	Inorganic ion transport and metabolism	1.00998	0.00138406		0.00186475	0.00162441	2		0.00169035	0.00152634	0.00160835	2
OG1RF_11476_1476	SecA	preprotein translocase subunit SecA	Cytoplasmic	Protein fate	Protein and peptide secretion and trafficking	1.01	0.0176927	0.0107769	0.0184372	0.0156356	3	0.0116966	0.0168968	0.017849	0.0154808	3
OG1RF_11908_1908	OG1RF_11908	hypothetical protein	Cytoplasmic	poorly characterized	Function unknown	1.01215	0.0130999	0.00721559	0.0154244	0.0119133	3	0.0138293	0.0107848	0.0106967	0.0117703	3
OG1RF_11892_1892	TypA	GTP-binding protein TypA/BipA	Cytoplasmic Membrane	Regulatory functions	Other	1.01232	0.0452832	0.0563632	0.0511518	0.0509327	3	0.0510176	0.0528096	0.0471112	0.0503128	3
OG1RF_12228_2228	FolC	tetrahydrofolate synthase	Cytoplasmic	Biosynthesis of cofactors, prosthetic groups, and carriers	Folic acid	1.01253	0.00479657		0.00482502	0.0048108	2	0.00270699	0.00333769	0.00820912	0.00475127	3
OG1RF_12372_2372	PlsX	fatty acid/phospholipid synthesis protein PlsX	Cytoplasmic	Fatty acid and phospholipid metabolism	Biosynthesis	1.01319	0.0084026	0.0145917	0.00423964	0.00907799	3	0.00772615	0.00740985	0.0117433	0.00895977	3
OG1RF_11043_1043	InfB	translation initiation factor IF2	Cytoplasmic	Protein synthesis	Translation factors	1.01357	0.0403546	0.0428235	0.0379373	0.0403718	3	0.0446935	0.0383672	0.0364329	0.0398312	3
OG1RF_10925_925	Pbp1A	penicillin-binding protein 1A	Extracellular	Cell envelope	Biosynthesis and degradation of murein sacculus and peptidoglycan	1.01582	0.00388207	0.00264172	0.00299788	0.00317389	3	0.00447482	0.00180044	0.00309815	0.00312447	3
OG1RF_11064_1064	TruB	tRNA pseudouridine synthase B	Cytoplasmic	Protein synthesis	tRNA and rRNA base modification	1.01641	0.00432259		0.00512741	0.004725	2	0.00159351	0.00194405	0.0104086	0.00464871	0
OG1RF_12081_2081	RplJ	50S ribosomal protein L10	Cytoplasmic	Protein synthesis	Ribosomal proteins: synthesis and modification	1.01711	0.176332	0.21188	0.130751	0.172988	3	0.166067	0.166874	0.177293	0.170078	3
OG1RF_11633_1633	HisS	histidine--tRNA ligase	Cytoplasmic	Protein synthesis	tRNA aminoacylation	1.01715	0.0179609	0.0217455	0.0259688	0.0218917	3	0.0141675	0.0230708	0.0273294	0.0215226	3
OG1RF_11632_1632	AspS	aspartate--tRNA ligase	Cytoplasmic	Protein synthesis	tRNA aminoacylation	1.01767	0.0164405	0.0161209	0.0177773	0.0167796	3	0.0184425	0.0165857	0.0144365	0.0164882	3
OG1RF_11573_1573	MurC	UDP-N-acetylmuramate--L-alanine ligase	Cytoplasmic	Cell envelope	Biosynthesis and degradation of murein sacculus and peptidoglycan	1.01833	0.0112069	0.0249415	0.0142577	0.016802	3	0.0174742	0.0168498	0.0151746	0.0164995	3
OG1RF_10002_2	DnaN	DNA-directed DNA polymerase III beta subunit	Cytoplasmic	DNA metabolism	DNA replication, recombination, and repair	1.01865	0.0520263	0.0280376	0.0500093	0.0433577	3	0.0405768	0.0469349	0.0401797	0.0425638	3
OG1RF_10425_425	Hit	HIT family protein	Cytoplasmic	metabolism	Nucleotide transport and metabolism	1.02409	0.00682295		0.00771828	0.00727061	2	0.00539042	0.00693391	0.00897435	0.00709956	3
OG1RF_10575_575	Ppx	exopolyphosphatase	Cytoplasmic	Cell envelope	Biosynthesis and degradation of murein sacculus and peptidoglycan	1.02563	0.00460759	0.00892494	0.00464867	0.0060604	3	0.00605339	0.00673081	0.00494273	0.00590897	3
OG1RF_11916_1916	MetQ	ABC superfamily ATP binding cassette transporter, binding protein	Cytoplasmic Membrane	metabolism	Inorganic ion transport and metabolism	1.02576	0.00855126	0.00973645	0.00705826	0.00844866	3	0.00687833	0.00868543	0.00914574	0.0082365	3
OG1RF_12169_2169	YeeN	glucose-1-phosphate adenylyltransferase	Cytoplasmic	Regulatory functions	DNA interactions	1.02642	0.0577683	0.115251	0.0669978	0.0800058	3	0.0599371	0.072136	0.101767	0.0779468	3
OG1RF_12182_2182	AccB	acetyl-CoA carboxylase biotin carboxyl carrier subunit	Cytoplasmic	Fatty acid and phospholipid metabolism	Biosynthesis	1.02691	0.0210354	0.0165334	0.0236082	0.0203923	3	0.0221411	0.0181856	0.0192474	0.019858	3
OG1RF_10705_705	RpmA	50S ribosomal protein L27	Cytoplasmic	Protein synthesis	Ribosomal proteins: synthesis and modification	1.02695	0.179098	0.27914	0.207842	0.222027	3	0.222726	0.216685	0.209189	0.2162	3
OG1RF_10452_452	Tig	trigger factor	Cytoplasmic	Protein fate	Protein folding and stabilization	1.02762	0.163384	0.244971	0.163775	0.19071	3	0.200651	0.171455	0.184649	0.185585	3
OG1RF_10172_172	Adk	adenylate kinase	Cytoplasmic	Purines, pyrimidines, nucleosides, and nucleotides	Nucleotide and nucleoside interconversions	1.02854	0.0759491	0.0436266	0.0603177	0.0599645	3	0.0596595	0.0592179	0.0560251	0.0583009	3
OG1RF_10534_534	LeuS	leucine--tRNA ligase	Cytoplasmic	Protein synthesis	tRNA aminoacylation	1.02924	0.025835	0.0290365	0.0299913	0.0282876	3	0.0274085	0.0312901	0.0237535	0.027484	3
OG1RF_12224_2224	OG1RF_12224	metallo-beta-lactamase superfamily protein	Cytoplasmic	Transcription	Degradation of RNA	1.02957	0.0093084	0.0131889	0.0183823	0.0136265	3	0.0122407	0.0128889	0.0145759	0.0132351	3
OG1RF_11915_1915	UppS	di-trans,poly-cis-decaprenylcistransferase	Cytoplasmic	Cell envelope	Biosynthesis and degradation of surface polysaccharides and lipopolysaccharides	1.02989	0.00462861		0.00246919	0.0035489	2	0.00357963	0.00337471	0.00338334	0.00344589	3
OG1RF_10141_141	GpmA	phosphoglycerate mutase	Cytoplasmic	metabolism	Carbohydrate transport and metabolism	1.03132	0.207041	0.293874	0.215568	0.238828	3	0.279532	0.194204	0.220989	0.231575	3
OG1RF_12538_2538	GuaB	IMP dehydrogenase	Cytoplasmic	Purines, pyrimidines, nucleosides, and nucleotides	Purine ribonucleotide biosynthesis	1.03309	0.0161582	0.00908078	0.0208585	0.0153658	3	0.0179971	0.0136621	0.0129617	0.0148736	3
OG1RF_10661_661	OG1RF_10661	TatD family hydrolase	Cytoplasmic	poorly characterized	Enzymes of unknown specificity	1.03365	0.00212012	0.00166137	0.00312453	0.00230201	3	0.00119383	0.00122003	0.00426731	0.00222706	3
OG1RF_10657_657	MetG	methionine--tRNA ligase	Cytoplasmic	Protein synthesis	tRNA aminoacylation	1.03649	0.0261434	0.0251276	0.0256721	0.0256477	3	0.0291567	0.0226228	0.0224551	0.0247448	3
OG1RF_12083_2083	RplK	50S ribosomal protein L11	Cytoplasmic	Protein synthesis	Ribosomal proteins: synthesis and modification	1.0372	0.130911	0.241143	0.124952	0.165669	3	0.164564	0.15962	0.154999	0.159727	3
OG1RF_12231_2231	ValS	valine--tRNA ligase	Cytoplasmic	Protein synthesis	tRNA aminoacylation	1.03756	0.0381597	0.0295654	0.0407987	0.0361746	3	0.0347609	0.0366135	0.0332206	0.034865	3
OG1RF_11372_1372	BkdA	3-methyl-2-oxobutanoate dehydrogenase	Cytoplasmic	metabolism	Energy production and conversion	1.03828	0.0357552	0.023022	0.0294728	0.0294167	3	0.0287415	0.0383376	0.0179172	0.0283321	3
OG1RF_10609_609	NrdR	transcriptional regulator NrdR	Cytoplasmic	Regulatory functions	DNA interactions	1.03844	0.00361507	0.00526575	0.00422977	0.0043702	3	0.00210956	0.00455605	0.00595962	0.00420841	3
OG1RF_11354_1354	OG1RF_11354	iron (Fe) ABC superfamily ATP binding cassette transporter, binding protein	Unknown	metabolism	Inorganic ion transport and metabolism	1.03938	0.00267105	0.00384406	0.00182158	0.00277889	3	0.00230197	0.00285538	0.00286346	0.0026736	3
OG1RF_11990_1990	AtpF3	ATP synthase F0 sector subunit B	Cytoplasmic Membrane	Energy metabolism	ATP-proton motive force interconversion	1.03953	0.00280874	0.0126266	0.00527512	0.00690349	3	0.00472814	0.00753713	0.00765771	0.00664099	3
OG1RF_12065_2065	NudF	ADP-ribose diphosphatase	Cytoplasmic	DNA metabolism	DNA replication, recombination, and repair	1.04184	0.00350396		0.00219728	0.00285062	2	0.00218162	0.00299725	0.00302953	0.00273613	3
OG1RF_11741_1741	OG1RF_11741	flavodoxin	Cytoplasmic	Energy metabolism	Electron transport	1.04281	0.0122068	0.0118256	0.0156608	0.013231	3	0.0117866	0.014129	0.0121482	0.0126879	3
OG1RF_12340_2340	RpsD	30S ribosomal protein S4	Cytoplasmic	Protein synthesis	Ribosomal proteins: synthesis and modification	1.04346	0.139056	0.148937	0.127552	0.138515	3	0.158637	0.122305	0.117295	0.132746	3
OG1RF_10779_779	Pyk	pyruvate kinase	Cytoplasmic	Energy metabolism	Glycolysis/gluconeogenesis	1.04771	0.266825	0.210961	0.186077	0.221288	3	0.233612	0.186829	0.213192	0.211211	3
OG1RF_11242_1242	RpoD	RNA polymerase sigma factor rpoD	Cytoplasmic	Transcription	Transcription factors	1.04942	0.024841	0.0546212	0.0402562	0.0399062	3	0.0258097	0.0397135	0.0485577	0.038027	3
OG1RF_12311_2311	TraC2	peptide ABC superfamily ATP binding cassette transporter, binding protein	Cellwall	metabolism	Amino acid transport and metabolism	1.04978	0.0169139	0.0140567	0.0215406	0.0175037	3	0.0150259	0.0163354	0.01866	0.0166738	3
OG1RF_12035_2035	OG1RF_12035	RNA methyltransferase	Cytoplasmic	Protein synthesis	tRNA and rRNA base modification	1.05116	0.0164142	0.00482565	0.0162355	0.0124918	3	0.0121911	0.0118309	0.0116295	0.0118838	3
OG1RF_11162_1162	PhnA	alkylphosphonate uptake protein	Unknown	poorly characterized	General	1.05229	0.00911326	0.0183572	0.00841944	0.0119633	3	0.0101636	0.00943607	0.0145067	0.0113688	3
OG1RF_10922_922	OG1RF_10922	hypothetical protein	Cytoplasmic	poorly characterized	Function unknown	1.05237	0.0143616	0.00260206	0.0127156	0.00989308	3	0.0088072	0.00958121	0.00981398	0.0094008	3
OG1RF_10448_448	PtsI	PTS family porter, enzyme I	Cytoplasmic	Signal transduction	PTS	1.05291	0.121923	0.0980969	0.132843	0.117621	3	0.106585	0.120818	0.107729	0.111711	3
OG1RF_11888_1888	PycA	pyruvate carboxylase	Cytoplasmic	Energy metabolism	Glycolysis/gluconeogenesis	1.0535	0.0125218	0.0214868	0.0149465	0.0163183	3	0.0116349	0.0217799	0.0130542	0.0154897	3
OG1RF_10046_46	OG1RF_10046	RNA methyltransferase	Unknown	Protein synthesis	tRNA and rRNA base modification	1.05369	0.00352607		0.00418953	0.0038578	2	0.00407531	0.00363262	0.00327573	0.00366122	3
OG1RF_10985_985	AlsS	acetolactate synthase	Cytoplasmic Membrane	Protein synthesis	tRNA aminoacylation	1.05424	0.0307484	0.0335683	0.0376566	0.0339911	3	0.028508	0.0403334	0.0278855	0.0322423	3
OG1RF_12418_2418	OG1RF_12418	M16 family peptidase	Cytoplasmic	poorly characterized	General function prediction only	1.0557	0.00920804	0.00175891	0.00542719	0.00546471	3	0.00407986	0.00639529	0.00505394	0.00517636	3
OG1RF_12513_2513	HepT	trans-hexaprenyltranstransferase	Cytoplasmic	metabolism	Coenzyme transport and metabolism	1.05916	0.00220269	0.00128335	0.00126558	0.00158387	3	0.00162217	0.00229472	0.000569333	0.00149541	3
OG1RF_12189_2189	OG1RF_12189	MarR family transcriptional regulator	Cytoplasmic	information storage and processing	Transcription	1.05936	0.0357701		0.0144908	0.0251304	2	0.0121186	0.0287327	0.0303159	0.0237224	3
OG1RF_12192_2192	OG1RF_12192	group 1 glycosyl transferase	Cytoplasmic	Cell envelope	Biosynthesis and degradation of surface polysaccharides and lipopolysaccharides	1.06338	0.00255296	0.00224339	0.00242445	0.00240693	3	0.000893788	0.00448338	0.00141325	0.00226347	3
OG1RF_11065_1065	RibF	riboflavin biosynthesis protein RibF	Cytoplasmic	Biosynthesis of cofactors, prosthetic groups, and carriers	Riboflavin, FMN, and FAD	1.06388	0.00308141		0.00291618	0.00299879	2	0.00265007	0.0028431	0.00296304	0.00281873	0
OG1RF_11791_1791	OG1RF_11791	GNAT family acetyltransferase	Cytoplasmic	poorly characterized	General function prediction only	1.06407	0.00286916	0.00368874	0.00248706	0.00301499	3	0.00261246	0.00338674	0.00250116	0.00283345	3
OG1RF_11358_1358	HslU	ATP-dependent hsl protease ATP-binding subunit HslU	Cytoplasmic	Protein fate	Degradation of proteins, peptides, and glycopeptides	1.06427	0.0184284	0.0105629	0.0224383	0.0171432	3	0.0177525	0.0144005	0.0161708	0.0161079	3
OG1RF_10742_742	OG1RF_10742	DEAD/DEAH box family ATP-dependent RNA helicase	Cytoplasmic	DNA metabolism	DNA replication, recombination, and repair	1.06618	0.00211019	0.00390119	0.00211327	0.00270822	3	0.00180147	0.00219544	0.00362344	0.00254012	3
OG1RF_10455_455	FruK2	1-phosphofructokinase	Unknown	metabolism	Carbohydrate transport and metabolism	1.0686	0.0313439	0.0307221	0.0381911	0.0334191	3	0.0268769	0.0313674	0.0355771	0.0312738	3
OG1RF_11702_1702	GlnR	regulatory protein GlnR	Cytoplasmic	information storage and processing	Transcription	1.07228	0.00563615	0.00291671	0.00554581	0.00469956	3	0.0047752	0.00309071	0.0052824	0.00438277	3
OG1RF_10342_342	SorB	PTS family mannose/fructose/sorbose porter, IIB component	Cytoplasmic	metabolism	Carbohydrate transport and metabolism	1.07385	0.00264139		0.00161844	0.00212992	2	0.00200768	0.00309108	0.000851529	0.00198343	3
OG1RF_11147_1147	OG1RF_11147	glycerone kinase PTS family porter component IIA	Cytoplasmic	poorly characterized	Function unknown	1.07572	0.00666718		0.0164383	0.0115527	2	0.0050573	0.0113299	0.0158313	0.0107395	0
OG1RF_12565_2565	CitE	citrate (Pro-3S)-lyase	Cytoplasmic	Energy metabolism	Fermentation	1.07719	0.0255262	0.0133524	0.0225846	0.0204877	3	0.0123011	0.0226556	0.0221021	0.0190196	3
OG1RF_10570_570	OG1RF_10570	4-hydroxy-2-oxoglutarate aldolase	Unknown	poorly characterized	Conserved	1.07818	0.00452291		0.00569031	0.00510661	2	0.00530937	0.00556576	0.00333387	0.00473634	3
OG1RF_10101_101	ArcC	carbamate kinase	Cytoplasmic	Energy metabolism	Amino acids and amines	1.08203	0.322542	0.2886	0.220128	0.27709	3	0.234689	0.285816	0.247744	0.256083	3
OG1RF_11029_1029	OG1RF_11029	response regulator	Cytoplasmic	cellular processes and signaling	Signal transduction mechanisms	1.08444	0.00408355	0.00288872	0.004032	0.00366809	3	0.00371204		0.00305292	0.00338248	2
OG1RF_11724_1724	OG1RF_11724	group 2 glycosyl transferase	Cytoplasmic Membrane	poorly characterized	General function prediction only	1.08512	0.00381282		0.00217679	0.0029948	2	0.00206553	0.00358296	0.00263115	0.00275988	0
OG1RF_10147_147	Tuf	elongation factor EF1A	Cytoplasmic	Protein synthesis	Translation factors	1.08836	0.495243	1.68038	0.572153	0.915925	3	0.949929	0.831476	0.743289	0.841565	3
OG1RF_11362_1362	TopA	DNA topoisomerase TopA	Cytoplasmic	DNA metabolism	DNA replication, recombination, and repair	1.09196	0.0068022	0.00186884	0.0064214	0.00503081	3	0.00320385	0.00403776	0.00657977	0.00460712	3
OG1RF_12487_2487	RplM	50S ribosomal protein L13	Unknown	Protein synthesis	Ribosomal proteins: synthesis and modification	1.09397	0.113247	0.236915	0.169752	0.173305	3	0.134425	0.142962	0.197867	0.158418	3
OG1RF_11645_1645	OG1RF_11645	adenine-specific methyltransferase	Unknown	DNA metabolism	DNA replication, recombination, and repair	1.09459	0.00504563		0.00383341	0.00443952	2	0.00361315	0.00441097	0.00414345	0.00405586	0
OG1RF_11839_1839	GlyS	glycyl-tRNA synthetase beta subunit	Cytoplasmic	Protein synthesis	tRNA aminoacylation	1.09812	0.0395134	0.0466118	0.0432061	0.0431104	3	0.0379818	0.0402276	0.0395661	0.0392585	3
OG1RF_11600_1600	OG1RF_11600	hypothetical protein	Cytoplasmic	poorly characterized	Function unknown	1.09832	0.0182722	0.0131633	0.0174682	0.0163013	3	0.0189051	0.012347	0.0132737	0.0148419	3
OG1RF_11371_1371	BkdB	3-methyl-2-oxobutanoate dehydrogenase	Cytoplasmic	metabolism	Energy production and conversion	1.0992	0.0461635	0.0224686	0.0495695	0.0394005	3	0.0450684	0.0383559	0.0241102	0.0358448	3
OG1RF_10945_945	FbaB	fructose-bisphosphate aldolase	Cytoplasmic	Energy metabolism	Glycolysis/gluconeogenesis	1.09926	0.145406	0.378242	0.141891	0.221846	3	0.266722	0.19552	0.143199	0.201813	3
OG1RF_11466_1466	PstB	ABC superfamily ATP binding cassette transporter, ABC protein	Cytoplasmic Membrane	Transport and binding proteins	Anions	1.10107	0.00244353		0.00184741	0.00214547	2		0.00168207	0.00221499	0.00194853	2
OG1RF_12099_2099	XthA	exodeoxyribonuclease III	Cytoplasmic	DNA metabolism	DNA replication, recombination, and repair	1.1015	0.0073628	0.00726191	0.00516979	0.00659817	3	0.00653386	0.0058819	0.00555466	0.00599014	3
OG1RF_10579_579	Alr	alanine racemase	Cytoplasmic	Cell envelope	Biosynthesis and degradation of murein sacculus and peptidoglycan	1.10341	0.00905833		0.00487954	0.00696893	2	0.00463517	0.00781278	0.00649944	0.0063158	3
OG1RF_11464_1464	OG1RF_11464	hypothetical protein	Cytoplasmic	poorly characterized	Function unknown	1.106	0.0381137	0.0214126	0.0326998	0.030742	3	0.0309037	0.0270786	0.0254051	0.0277958	3
OG1RF_11077_1077	GrpE	co-chaperone GrpE	Cytoplasmic	Protein fate	Protein folding and stabilization	1.1063	0.0576764	0.0413936	0.0548505	0.0513068	3	0.0534915	0.0410071	0.0446325	0.0463771	3
OG1RF_12176_2176	YqeH	ribosome biogenesis GTPase YqeH	Cytoplasmic Membrane	Protein synthesis	Other	1.10702	0.0138317	0.00133398	0.00876045	0.00797537	3	0.00472405	0.00838894	0.00850004	0.00720434	3
OG1RF_12306_2306	OG1RF_12306	tRNA binding domain protein	Cytoplasmic	poorly characterized	General function prediction only	1.10881	0.00837091	0.00541318	0.0101369	0.00797366	3	0.00941442	0.00680263	0.00535649	0.00719118	3
OG1RF_11170_1170	PepT	M20 family tripeptide aminopeptidase	Cytoplasmic	Protein fate	Degradation of proteins, peptides, and glycopeptides	1.10911	0.0226001	0.0321993	0.0308754	0.0285583	3	0.0248291	0.0305365	0.021881	0.0257489	3
OG1RF_10724_724	PbpC	penicillin-binding protein C	Cytoplasmic Membrane	Cell envelope	Biosynthesis and degradation of surface polysaccharides and lipopolysaccharides	1.10928	0.00304934		0.00167269	0.00236102	2	0.0024903	0.000901812	0.00299315	0.00212842	3
OG1RF_11574_1574	OG1RF_11574	hypothetical protein	Unknown	poorly characterized	Function unknown	1.11041	0.00215879		0.00418227	0.00317053	2	0.00113819	0.00413371	0.00329393	0.00285527	0
OG1RF_10901_901	OG1RF_10901	phosphoesterase	Cytoplasmic	poorly characterized	Enzymes of unknown specificity	1.11536	0.00295933		0.00720602	0.00508268	2	0.00329021	0.00582373		0.00455697	2
OG1RF_12434_2434	HexB	DNA mismatch repair protein HexB	Cytoplasmic	DNA metabolism	DNA replication, recombination, and repair	1.11698	0.0128918		0.0101004	0.0114961	2	0.0127223	0.0103505	0.00780365	0.0102921	3
OG1RF_10561_561	OG1RF_10561	transcriptional regulator	Cytoplasmic	poorly characterized	Conserved	1.11724	0.00179082		0.00270341	0.00224712	2	0.00191938	0.00143223	0.00268234	0.00201132	3
OG1RF_11768_1768	TrpS	tryptophan--tRNA ligase	Cytoplasmic	Protein synthesis	tRNA aminoacylation	1.11853	0.00572216	0.00111504	0.0052481	0.00402843	3	0.00387338	0.00317296	0.0037583	0.00360155	3
OG1RF_10021_21	OG1RF_10021	PTS family mannose/fructose/sorbose porter component IID	Cytoplasmic Membrane	Transport and binding proteins	Carbohydrates, organic alcohols, and acids	1.11904	0.0767107	0.0476335	0.0580274	0.0607905	3	0.0511962	0.0364927	0.0752819	0.0543236	3
OG1RF_12386_2386	Sun	ribosomal RNA small subunit methyltransferase B	Cytoplasmic	Protein synthesis	tRNA and rRNA base modification	1.12227	0.00372685		0.00364337	0.00368511	2	0.00320723	0.00280298	0.00384066	0.00328362	3
OG1RF_11313_1313	OG1RF_11313	putative lipoprotein	Cytoplasmic Membrane	poorly characterized	Function unknown	1.12803	0.00290206	0.00318307	0.0149866	0.0070239	3	0.00538463	0.00550586	0.00778953	0.00622668	3
OG1RF_12047_2047	SpxA	regulatory protein Spx	Cytoplasmic	Regulatory functions	DNA interactions	1.12878	0.0257292	0.00670541	0.0275809	0.0200052	3	0.018251	0.0176906	0.0172268	0.0177228	3
OG1RF_11144_1144	Lpd	dihydrolipoyl dehydrogenase	Cytoplasmic	metabolism	Energy production and conversion	1.1292	0.228561	0.235873	0.188822	0.217752	3	0.223467	0.187743	0.167303	0.192837	3
OG1RF_10730_730	FtsZ	cell division protein FtsZ	Unknown	Cellular processes	Cell division	1.13035	0.113129	0.176825	0.122807	0.137587	3	0.0993866	0.117394	0.148382	0.121721	3
OG1RF_11370_1370	BkdC	branched-chain alpha-keto acid	Cytoplasmic	metabolism	Energy production and conversion	1.13036	0.0481946	0.0164271	0.0653722	0.0433313	3	0.0355115	0.0445922	0.0348986	0.0383341	3
OG1RF_10625_625	OG1RF_10625	preprotein translocase, YajC subunit	Unknown	Protein fate	Protein and peptide secretion and trafficking	1.13243	0.027535	0.0719734	0.0182495	0.0392526	3	0.0265474	0.0336248	0.0438142	0.0346621	3
OG1RF_11831_1831	PyrH	UMP kinase	Cytoplasmic	Purines, pyrimidines, nucleosides, and nucleotides	Nucleotide and nucleoside interconversions	1.13254	0.0476484	0.0390269	0.0426491	0.0431082	3	0.0351617	0.0409442	0.0380837	0.0380632	3
OG1RF_11444_1444	YneF	hypothetical protein	Cytoplasmic Membrane	poorly characterized	Function unknown	1.13324	0.015057		0.0112339	0.0131454	2	0.0134567	0.0057385	0.0156045	0.0115999	0
OG1RF_11581_1581	ClpX	ATP-dependent Clp protease ATP-binding subunit	Cytoplasmic	Protein fate	Degradation of proteins, peptides, and glycopeptides	1.13475	0.0164596	0.0286263	0.0190347	0.0213735	3	0.0186293	0.0184368	0.0194403	0.0188355	3
OG1RF_11213_1213	AtpA	ATP synthase F1 sector alpha subunit	Cytoplasmic	Energy metabolism	ATP-proton motive force interconversion	1.13674	0.0070401	0.00385484	0.00797944	0.00629146	3	0.00489684	0.00496011	0.00674701	0.00553465	3
OG1RF_10258_258	IscS	cysteine desulfurase	Cytoplasmic	metabolism	Amino acid transport and metabolism	1.1393	0.00407354		0.00359969	0.00383661	2	0.003135	0.00287364	0.00409393	0.00336753	3
OG1RF_11701_1701	GlnA	glutamate--ammonia ligase	Cytoplasmic	Amino acid biosynthesis	Glutamate family	1.13938	0.0937417	0.0545434	0.0932498	0.0805116	3	0.0690198	0.0640322	0.0789361	0.0706627	3
OG1RF_10099_99	ArcA	arginine deiminase	Cytoplasmic	Energy metabolism	Amino acids and amines	1.14046	0.279189	0.378947	0.232398	0.296845	3	0.30356	0.274097	0.203199	0.260285	3
OG1RF_11676_1676	Prs2	phosphoribosyl pyrophosphate synthetase	Cytoplasmic	Purines, pyrimidines, nucleosides, and nucleotides	Purine ribonucleotide biosynthesis	1.14097	0.011238		0.0140111	0.0126245	2	0.0125196	0.0122133	0.00846129	0.0110647	0
OG1RF_11829_1829	SufC	ABC superfamily ATP binding cassette transporter, ABC protein	Cytoplasmic	Biosynthesis of cofactors, prosthetic groups, and carriers	Other	1.14401	0.0290451	0.0494915	0.0522801	0.0436056	3	0.0364957	0.042544	0.0353093	0.0381163	3
OG1RF_12158_2158	PenA	penicillin-binding protein 2B	Cytoplasmic Membrane	Cell envelope	Biosynthesis and degradation of surface polysaccharides and lipopolysaccharides	1.14473	0.00732944		0.0021992	0.00476432	2	0.00272268	0.00403815	0.00572508	0.00416197	3
OG1RF_12185_2185	FabD	malonyl-CoA-[acyl-carrier-protein] transacylase	Cytoplasmic	Fatty acid and phospholipid metabolism	Biosynthesis	1.14819	0.0222791	0.0490917	0.0293228	0.0335645	3	0.0315368	0.0282335	0.0279276	0.0292326	3
OG1RF_12199_2199	Tig3	peptidylprolyl isomerase	Cytoplasmic	Protein fate	Protein folding and stabilization	1.14993	0.0732665	0.0256874	0.0762845	0.0584128	3	0.0417383	0.053368	0.0572841	0.0507968	3
OG1RF_10496_496	GlnP	amino acid ABC superfamily ATP binding cassette transporter, binding/permease protein	Cytoplasmic Membrane	Transport and binding proteins	Amino acids, peptides and amines	1.15988	0.00801117	0.00753314	0.00614799	0.00723076	3	0.00732196	0.00419556	0.0071846	0.00623404	3
OG1RF_10011_11	RplI	50S ribosomal protein L9	Cytoplasmic	Protein synthesis	Ribosomal proteins: synthesis and modification	1.16227	0.0216359		0.0257146	0.0236752	2	0.0319309	0.0168582	0.0123205	0.0203699	3
OG1RF_11078_1078	DnaK	chaperone DnaK	Cytoplasmic	Protein fate	Protein folding and stabilization	1.1647	0.222469	0.30723	0.212062	0.247254	3	0.226772	0.194972	0.215128	0.21229	3
OG1RF_11828_1828	SufD	iron-sulfur ABC superfamily ATP binding cassette transporter, membrane protein	Cytoplasmic	Biosynthesis of cofactors, prosthetic groups, and carriers	Other	1.16521	0.0292779	0.0129335	0.027928	0.0233798	3	0.0199981	0.0189601	0.0212366	0.0200649	3
OG1RF_12385_2385	PphA	serine/threonine protein phosphatase 1	Unknown	cellular processes and signaling	Signal transduction mechanisms	1.16661	0.00389101	0.00186671		0.00287886	2	0.00224172	0.00240844	0.00275298	0.00246772	3
OG1RF_11504_1504	IlvE	branched-chain-amino-acid transaminase	Cytoplasmic	Amino acid biosynthesis	Pyruvate family	1.16683	0.00659755	0.00494327	0.0095929	0.00704457	3	0.00357759	0.00993438	0.00460005	0.00603734	3
OG1RF_10146_146	FusA	elongation factor G	Cytoplasmic	Protein synthesis	Translation factors	1.17038	0.215194	0.443119	0.28443	0.314248	3	0.279778	0.263493	0.262233	0.268501	3
OG1RF_12575_2575	OG1RF_12575	RNA-binding protein	Cytoplasmic	poorly characterized	General function prediction only	1.17301	0.00883391	0.00574965	0.0143275	0.00963702	3	0.0086275	0.00842638	0.0075931	0.00821566	3
OG1RF_10459_459	LigA	NAD-dependent DNA ligase LigA	Cytoplasmic	DNA metabolism	DNA replication, recombination, and repair	1.17359	0.0129686	0.00612117	0.0171419	0.0120772	3	0.00967287	0.00904244	0.0121572	0.0102908	3
OG1RF_10955_955	Asd	aspartate-semialdehyde dehydrogenase	Cytoplasmic	Amino acid biosynthesis	Aspartate family	1.1741	0.00218487	0.00441424	0.00353302	0.00337738	3	0.00186585	0.00229283	0.00447098	0.00287656	3
OG1RF_11458_1458	GpsA	glycerol-3-phosphate dehydrogenase (NAD(P)(+))	Cytoplasmic	metabolism	Energy production and conversion	1.17677	0.0166621	0.0126859	0.0109508	0.0134329	3	0.00893844	0.0134841	0.0118225	0.011415	3
OG1RF_10173_173	InfA	translation initiation factor IF-1	Cytoplasmic	Protein synthesis	Translation factors	1.18036	0.123618	0.053887	0.106017	0.0945072	3	0.0557278	0.0972912	0.0871803	0.0800664	3
OG1RF_12108_2108	CelM	M42 family glutamyl aminopeptidase	Cytoplasmic Membrane	metabolism	Carbohydrate transport and metabolism	1.18277	0.010662	0.0110835	0.00994108	0.0105622	3	0.00757797	0.0116849	0.00752734	0.00893007	3
OG1RF_12105_2105	LplA2	lipoate-protein ligase	Cytoplasmic	Protein fate	Protein modification and repair	1.18524	0.0447347	0.0463905	0.03687	0.0426651	3	0.0294784	0.0468437	0.0316692	0.0359971	3
OG1RF_10161_161	RplN	50S ribosomal protein L14	Cytoplasmic	Protein synthesis	Ribosomal proteins: synthesis and modification	1.18827	0.0957322	0.0681454	0.0651706	0.0763494	3	0.0603308	0.0827015	0.0497253	0.0642525	3
OG1RF_11884_1884	OG1RF_11884	RsmD family RNA methyltransferase	Unknown	Protein synthesis	tRNA and rRNA base modification	1.19165	0.00315595	0.00148418	0.00320091	0.00261368	3		0.00217007	0.0022166	0.00219333	2
OG1RF_10392_392	OG1RF_10392	M3 family peptidase	Cytoplasmic	metabolism	Amino acid transport and metabolism	1.19503	0.0137409	0.0106085	0.0113417	0.0118971	3	0.0113385	0.0114744	0.00705342	0.00995545	3
OG1RF_11305_1305	Ndh	NADH dehydrogenase	Cytoplasmic	poorly characterized	General function prediction only	1.19684	0.27377	0.440623	0.298601	0.337665	3	0.30237	0.277319	0.266704	0.282131	3
OG1RF_11088_1088	NagA	N-acetylglucosamine-6-phosphate deacetylase	Cytoplasmic	Central intermediary metabolism	Amino sugars	1.19686	0.0210302	0.029977	0.0324852	0.0278308	3	0.0193947	0.0226064	0.0277583	0.0232531	3
OG1RF_10245_245	PepC	aminopeptidase C	Cytoplasmic	metabolism	Amino acid transport and metabolism	1.19818	0.0439085	0.0539093	0.0544768	0.0507649	3	0.0342343	0.0492711	0.0435992	0.0423682	3
OG1RF_12010_2010	OG1RF_12010	CoA-binding domain protein	Unknown	poorly characterized	General function prediction only	1.20302	0.0185665	0.061965	0.0192972	0.0332762	3	0.0461446	0.0201903	0.0166466	0.0276605	3
OG1RF_11692_1692	GlmS	D-fructose-6-phosphate amidotransferase	Cytoplasmic	Cell envelope	Biosynthesis and degradation of murein sacculus and peptidoglycan	1.20479	0.102168	0.175244	0.0900544	0.122489	3	0.11256	0.110266	0.0821792	0.101668	3
OG1RF_11863_1863	OG1RF_11863	metallo-beta-lactamase superfamily protein	Cytoplasmic	poorly characterized	General function prediction only	1.20481	0.00354545		0.00356743	0.00355644	2	0.00355388	0.00234984		0.00295186	2
OG1RF_11456_1456	OG1RF_11456	methyl-accepting chemotaxis family protein	Unknown	poorly characterized	General function prediction only	1.20635	0.0138036		0.0160359	0.0149198	2	0.0166748	0.0104642	0.00996402	0.0123677	0
OG1RF_10454_454	FruA	PTS family fructose porter, IIABC component	Cytoplasmic Membrane	metabolism	Carbohydrate transport and metabolism	1.20788	0.0114638	0.0058619	0.0109751	0.00943361	3	0.00762685	0.00682694	0.00897637	0.00781005	3
OG1RF_11623_1623	Eno	enolase	Cytoplasmic	Energy metabolism	Glycolysis/gluconeogenesis	1.21043	0.389767	0.817865	0.4733	0.560311	3	0.45847	0.468077	0.462165	0.462904	3
OG1RF_11096_1096	OG1RF_11096	hypothetical protein	Unknown	poorly characterized	Function unknown	1.21051	0.0117076	0.00778553	0.00820203	0.00923172	3	0.00811496		0.00713764	0.0076263	2
OG1RF_11825_1825	SufB	ABC superfamily ATP binding cassette transporter, membrane protein	Cytoplasmic	Biosynthesis of cofactors, prosthetic groups, and carriers	Other	1.2109	0.0371649	0.0478768	0.0457373	0.043593	3	0.0356065	0.0337223	0.0386727	0.0360005	3
OG1RF_12564_2564	CitF	citrate (pro-3S)-lyase	Cytoplasmic	Energy metabolism	Fermentation	1.21163	0.0943598	0.0395375	0.0772411	0.0703795	3	0.0447486	0.0702148	0.0592962	0.0580865	3
OG1RF_11320_1320	ScrR	sucrose operon repressor ScrR	Cytoplasmic	information storage and processing	Transcription	1.22661	0.00322551		0.00604059	0.00463305	2	0.00566067	0.00309764	0.00257302	0.00377711	0
OG1RF_11005_1005	OG1RF_11005	ABC superfamily ATP binding cassette transporter, substrate-binding protein	Unknown	metabolism	Carbohydrate transport and metabolism	1.22673	0.00657004		0.00607455	0.00632229	2	0.00310642	0.0084892	0.00386574	0.00515379	0
OG1RF_11936_1936	Tdk	thymidine kinase	Cytoplasmic	metabolism	Nucleotide transport and metabolism	1.22886	0.00271787		0.00985601	0.00628694	2	0.00763276	0.00532092	0.00239453	0.00511607	3
OG1RF_10500_500	OG1RF_10500	ATP-binding protein	Cytoplasmic Membrane	poorly characterized	General function prediction only	1.22986	0.00853977	0.00839747	0.00769074	0.00820932	3	0.00935792	0.00590949	0.00475761	0.00667501	3
OG1RF_11143_1143	AceF	pyruvate dehydrogenase complex E2, dihydrolipoamide acetyltransferase	Cytoplasmic	metabolism	Energy production and conversion	1.23275	0.326622	0.495886	0.336793	0.386434	3	0.336577	0.29193	0.311915	0.313474	3
OG1RF_10100_100	ArcB	ornithine carbamoyltransferase	Cytoplasmic	Energy metabolism	Amino acids and amines	1.23726	0.377211	0.577533	0.286903	0.413882	3	0.303515	0.3865	0.313527	0.334514	3
OG1RF_12398_2398	UxuA	mannonate dehydratase	Cytoplasmic	Energy metabolism	Sugars	1.23976	0.00381771	0.00334229	0.00934464	0.00550155	3	0.00539215	0.00529739	0.00262321	0.00443758	3
OG1RF_10413_413	ArgR2	arginine repressor	Cytoplasmic	Amino acid biosynthesis	Glutamate family	1.24126	0.00383535		0.00547976	0.00465755	2		0.00331087	0.00419366	0.00375226	2
OG1RF_10199_199	Ldh1	L-lactate dehydrogenase	Cytoplasmic	Energy metabolism	Anaerobic	1.24138	0.270274	0.152958	0.198498	0.207243	3	0.142095	0.146676	0.212068	0.166946	3
OG1RF_12362_2362	FtsY	cell division protein FtsY	Cytoplasmic Membrane	Protein fate	Protein and peptide secretion and trafficking	1.24238	0.0101577	0.00892637	0.0164651	0.0118497	3	0.0106339	0.00867173	0.00930812	0.00953792	3
OG1RF_12435_2435	MutS3	DNA mismatch repair protein MutS	Cytoplasmic	DNA metabolism	DNA replication, recombination, and repair	1.24292	0.0107377	0.00404386	0.00604273	0.00694144	3	0.00484871	0.00274765	0.00915797	0.00558477	3
OG1RF_11726_1726	OG1RF_11726	ABC superfamily ATP binding cassette transporter, ABC protein	Cytoplasmic Membrane	metabolism	Carbohydrate transport and metabolism	1.24331	0.0104442	0.00477227	0.00432036	0.00651228	3	0.0043053	0.00356496	0.00784334	0.00523787	3
OG1RF_10126_126	OG1RF_10126	ABC superfamily ATP binding cassette transporter, ABC protein	Cytoplasmic Membrane	Protein fate	Protein and peptide secretion and trafficking	1.24823	0.0033861		0.00287944	0.00313277	2	0.00341378	0.00147914	0.0026364	0.00250977	3
OG1RF_10578_578	AcpS	holo-[acyl-carrier-protein] synthase	Cytoplasmic	Fatty acid and phospholipid metabolism	Biosynthesis	1.24917	0.00141966		0.000959657	0.00118966	2		0.0012046	0.000700108	0.000952356	2
OG1RF_10497_497	UvrB	excision endonuclease subunit UvrB	Cytoplasmic	DNA metabolism	DNA replication, recombination, and repair	1.24949	0.0017005		0.00269702	0.00219876	2	0.00185401	0.00174801	0.00167714	0.00175972	3
OG1RF_10572_572	OG1RF_10572	hypothetical protein	Cytoplasmic	DNA metabolism	DNA replication, recombination, and repair	1.24992	0.00334098	0.00143045	0.0036449	0.00280545	3	0.00208119	0.00246927	0.00218305	0.0022445	3
OG1RF_12142_2142	GalE4	UDP-glucose 4-epimerase	Cytoplasmic	Energy metabolism	Sugars	1.25199	0.0133054	0.0364656	0.00909721	0.0196227	3	0.00956137	0.0150652	0.022393	0.0156732	3
OG1RF_11142_1142	PdhB	pyruvate dehydrogenase complex E1 component beta subunit	Cytoplasmic	Energy metabolism	Pyruvate dehydrogenase	1.25351	0.299229	0.544124	0.352023	0.398459	3	0.298845	0.323932	0.330847	0.317875	3
OG1RF_10911_911	DapD	2,3,4,5-tetrahydropyridine-2,6-dicarboxylate N-acetyltransferase	Cytoplasmic	Amino acid biosynthesis	Aspartate family	1.25366	0.00232383	0.00666827	0.0036851	0.00422574	3	0.00399634	0.00366267	0.00245314	0.00337071	3
OG1RF_12147_2147	Glk	glucokinase	Cytoplasmic	poorly characterized	General	1.25447	0.0356222	0.0275107	0.033462	0.0321983	3	0.0232426	0.0213532	0.0324047	0.0256668	3
OG1RF_10977_977	OG1RF_10977	cro/CI family TPR domain transcriptional regulator	Cytoplasmic	poorly characterized	General function prediction only	1.25461	0.0642868	0.0394449	0.0573102	0.0536807	3	0.0437999	0.0426156	0.0419449	0.0427868	3
OG1RF_12425_2425	TrePP	glycosyl hydrolase	Cytoplasmic Membrane	metabolism	Carbohydrate transport and metabolism	1.25834	0.0352871	0.0683909	0.0635071	0.0557284	3	0.0436956	0.0455783	0.0435876	0.0442871	3
OG1RF_12493_2493	RpoB	DNA-directed RNA polymerase subunit beta	Cytoplasmic	Transcription	DNA-dependent RNA polymerase	1.25967	0.0797214	0.0485391	0.0752325	0.067831	3	0.0489235	0.0583643	0.0542574	0.0538484	3
OG1RF_11295_1295	ThyA	thymidylate synthase	Cytoplasmic	Purines, pyrimidines, nucleosides, and nucleotides	2'-Deoxyribonucleotide metabolism	1.2603	0.017075	0.00327202	0.00874551	0.00969749	3	0.00793501	0.00826048	0.00688835	0.00769461	3
OG1RF_12355_2355	OG1RF_12355	hypothetical protein	Cytoplasmic	poorly characterized	Function unknown	1.26086	0.00433122		0.00535379	0.00484251	2	0.0026994	0.00550127	0.00332126	0.00384064	3
OG1RF_12024_2024	PotA	spermidine/putrescine ABC superfamily ATP binding cassette transporter, ABC protein	Cytoplasmic Membrane	Transport and binding proteins	Amino acids, peptides and amines	1.2657	0.000854844	0.00190825	0.00146419	0.00140909	3		0.00102497	0.00120162	0.0011133	2
OG1RF_10122_122	DeoC	deoxyribose-phosphate aldolase	Cytoplasmic	Purines, pyrimidines, nucleosides, and nucleotides	Other	1.28227	0.0427222	0.0246617	0.023431	0.0302716	3	0.0143574	0.025292	0.031174	0.0236078	3
OG1RF_11790_1790	LepA	GTP-binding protein LepA	Cytoplasmic Membrane	poorly characterized	General	1.28417	0.00420125	0.0110256	0.00523542	0.00682074	3	0.0055968	0.00468697	0.00565036	0.00531138	3
OG1RF_10850_850	GalE2	UDP-glucose 4-epimerase	Cytoplasmic	Energy metabolism	Sugars	1.2843	0.0169707	0.0122226	0.0173826	0.0155253	3	0.00666525	0.0175118		0.0120885	2
OG1RF_11890_1890	OG1RF_11890	hypothetical protein	Cytoplasmic	poorly characterized	Function unknown	1.2902	0.00220207	0.00391455	0.00251571	0.00287744	3	0.00240196	0.00257084	0.00171788	0.00223023	3
OG1RF_11160_1160	OG1RF_11160	thioesterase	Cytoplasmic	information storage and processing	Transcription	1.29529	0.00273937		0.00274423	0.0027418	2	0.00292422	0.00212386	0.00130217	0.00211675	0
OG1RF_10498_498	UvrA	excision endonuclease subunit UvrA	Cytoplasmic	DNA metabolism	DNA replication, recombination, and repair	1.29716	0.00739736	0.00918668	0.00396062	0.00684822	3	0.0065016	0.00475327	0.00458331	0.00527939	3
OG1RF_10438_438	OG1RF_10438	hemolysin	Cytoplasmic Membrane	poorly characterized	General function prediction only	1.3047	0.000764122		0.00139951	0.00108181	2	0.000717818	0.000720216	0.00104947	0.000829168	3
OG1RF_11970_1970	OG1RF_11970	glyoxalase	Cytoplasmic	poorly characterized	General function prediction only	1.30864	0.0241754	0.0173653	0.0266995	0.0227467	3	0.0122886	0.0203189	0.0195384	0.017382	3
OG1RF_12571_2571	OG1RF_12571	hypothetical protein	Cytoplasmic	poorly characterized	Function unknown	1.31024	0.00430708		0.00484128	0.00457418	2	0.0041728	0.00252594	0.00377459	0.00349111	3
OG1RF_11418_1418	OG1RF_11418	family 38 glycosyl hydrolase	Cytoplasmic	metabolism	Carbohydrate transport and metabolism	1.31439	0.0293202	0.0131513	0.0234047	0.0219588	3	0.0150676	0.0178774	0.0171745	0.0167065	3
OG1RF_11283_1283	AroC	chorismate synthase	Cytoplasmic	Amino acid biosynthesis	Aromatic amino acid family	1.32696	0.00781567	0.0142285	0.00952852	0.0105242	3	0.00740455	0.00635973	0.010029	0.0079311	3
OG1RF_11602_1602	OG1RF_11602	putative calcium-transporting ATPase	Cytoplasmic Membrane	metabolism	Inorganic ion transport and metabolism	1.33253	0.00554167		0.00401513	0.0047784	2	0.00335147	0.00256565	0.00484074	0.00358596	0
OG1RF_12557_2557	TrmE	tRNA modification GTPase TrmE	Cytoplasmic	Protein synthesis	tRNA and rRNA base modification	1.33325	0.00924991	0.00562609	0.00286283	0.00591295	3	0.0027686	0.00281667	0.00771972	0.004435	3
OG1RF_11244_1244	OG1RF_11244	S1 RNA binding domain protein	Cytoplasmic	poorly characterized	Function unknown	1.33442	0.0111176	0.00170047	0.00537329	0.00606379	3	0.00532405	0.00423692	0.00407141	0.00454413	3
OG1RF_12187_2187	AcpP	acyl carrier protein	Cytoplasmic	Fatty acid and phospholipid metabolism	Biosynthesis	1.33629	0.144806	1.10939	0.0654826	0.439894	3	0.292205	0.315037	0.380328	0.32919	3
OG1RF_11753_1753	TreB	PTS family trehalose porter, IIBC component	Cytoplasmic Membrane	metabolism	Carbohydrate transport and metabolism	1.33802	0.02561	0.0128295	0.0324744	0.023638	3	0.0129495	0.0150097	0.02504	0.0176664	3
OG1RF_12204_2204	OG1RF_12204	hypothetical protein	Cytoplasmic	poorly characterized	General function prediction only	1.34009	0.0121874	0.0229237	0.0212191	0.0187767	3	0.0135548	0.0126261	0.0158536	0.0140115	3
OG1RF_10892_892	OG1RF_10892	transcriptional regulator	Cytoplasmic	information storage and processing	Transcription	1.34447	0.00480792	0.00964025	0.005081	0.00650972	3	0.00415599	0.0058921	0.00447749	0.00484186	3
OG1RF_11304_1304	OG1RF_11304	fur family transcriptional regulator	Cytoplasmic	metabolism	Inorganic ion transport and metabolism	1.34462	0.0102239	0.00127453	0.00878822	0.00676221	3	0.00556124	0.0046922	0.00483381	0.00502908	3
OG1RF_10005_5	GyrB	DNA topoisomerase (ATP-hydrolyzing) subunit B	Cytoplasmic	DNA metabolism	DNA replication, recombination, and repair	1.34519	0.00822375	0.0167348	0.00942223	0.0114602	3	0.00940934	0.00868025	0.00746861	0.0085194	3
OG1RF_10009_9	RpsR	30S ribosomal protein S18	Cytoplasmic	Protein synthesis	Ribosomal proteins: synthesis and modification	1.34525	0.00495148	0.0963516	0.0400749	0.047126	3	0.0305991	0.0330345	0.0414603	0.0350313	3
OG1RF_10611_611	DnaI	primosomal protein DnaI	Cytoplasmic	DNA metabolism	DNA replication, recombination, and repair	1.34847	0.0039239	0.00101423	0.00373513	0.00289109	3	0.00204718	0.00252451	0.00186023	0.00214398	3
OG1RF_11806_1806	AspB2	aspartate transaminase	Cytoplasmic	metabolism	Amino acid transport and metabolism	1.36042	0.00282217		0.00371304	0.0032676	2	0.00191887	0.00332958	0.00195726	0.00240191	3
OG1RF_12437_2437	OG1RF_12437	Ser/Thr protein phosphatase	Cytoplasmic	poorly characterized	Enzymes of unknown specificity	1.361	0.00203238	0.00582206	0.00297109	0.00360851	3	0.00370201	0.00233581	0.00191626	0.00265136	3
OG1RF_10036_36	ProA	glutamate-5-semialdehyde dehydrogenase	Cytoplasmic	Amino acid biosynthesis	Glutamate family	1.362	0.0263214		0.00736853	0.016845	2	0.0164681	0.00933155	0.0113037	0.0123678	3
OG1RF_10165_165	RpsH	30S ribosomal protein S8	Cytoplasmic	Protein synthesis	Ribosomal proteins: synthesis and modification	1.36222	0.120436	0.236963	0.135898	0.164432	3	0.119145	0.128008	0.114976	0.12071	3
OG1RF_10227_227	FabZ	(3R)-hydroxymyristoyl-[acyl-carrier-protein] dehydratase	Cytoplasmic	Fatty acid and phospholipid metabolism	Biosynthesis	1.36604	0.00651899	0.0191611	0.0106008	0.0120936	3	0.00909143	0.00541566	0.012052	0.00885304	3
OG1RF_10731_731	YlmE	YggS family pyridoxal phosphate enzyme	Cytoplasmic	poorly characterized	Enzymes of unknown specificity	1.36907	0.00388057	0.00279296	0.00168237	0.0027853	3	0.00217981	0.00189858	0.00202495	0.00203445	3
OG1RF_10718_718	RecN	DNA repair protein RecN	Cytoplasmic	DNA metabolism	DNA replication, recombination, and repair	1.36994	0.0037202	0.00243353	0.00390193	0.00335189	3	0.00225857	0.00291248	0.00216916	0.00244674	3
OG1RF_10152_152	RplD	ribosomal protein L4/L1 family protein	Cytoplasmic	Protein synthesis	Ribosomal proteins: synthesis and modification	1.37258	0.162292	0.438269	0.13284	0.244467	3	0.190586	0.154544	0.189191	0.178107	3
OG1RF_10844_844	OG1RF_10844	GAF domain protein	Cytoplasmic	cellular processes and signaling	Signal transduction mechanisms	1.3782	0.00243646		0.00260155	0.002519	2	0.00308045	0.001129	0.00127379	0.00182775	3
OG1RF_10619_619	AspB	aspartate aminotransferase	Cytoplasmic	metabolism	Amino acid transport and metabolism	1.37923	0.00125338	0.0070542	0.00145057	0.00325272	3	0.00182398	0.00269269	0.00255841	0.00235836	3
OG1RF_11247_1247	CgtA	obg family GTPase CgtA	Cytoplasmic	Protein synthesis	Other	1.37961	0.00607178	0.0163566	0.0122344	0.0115543	3	0.00822765	0.00759719	0.00930021	0.00837502	3
OG1RF_12473_2473	OG1RF_12473	dihydrouridine synthase	Cytoplasmic	information storage and processing	Translation, ribosomal structure and biogenesis	1.38402	0.00581408	0.00551752	0.0247743	0.0120353	3	0.00481406	0.0130098	0.00826386	0.00869592	3
OG1RF_11374_1374	Buk	butyrate kinase	Cytoplasmic	Energy metabolism	Fermentation	1.38417	0.0151092	0.0101005	0.0148876	0.0133657	3	0.0086642	0.00978437	0.0105198	0.00965613	3
OG1RF_11850_1850	OG1RF_11850	protein of hypothetical function DUF299	Cytoplasmic Membrane	poorly characterized	Function unknown	1.38619	0.00987466		0.00571874	0.0077967	2	0.00533522	0.00662878	0.00490967	0.00562456	3
OG1RF_12000_2000	NadE2	NAD(+) synthase	Cytoplasmic	Biosynthesis of cofactors, prosthetic groups, and carriers	Pyridine nucleotides	1.38817	0.0143625	0.0250132	0.0195323	0.019636	3	0.0130771	0.0169733	0.0123854	0.0141453	3
OG1RF_10663_663	KsgA	dimethyladenosine transferase	Cytoplasmic	Protein synthesis	tRNA and rRNA base modification	1.38851	0.00500314		0.00419546	0.0045993	2	0.00290056	0.0042772	0.00275946	0.0033124	3
OG1RF_11417_1417	AspC2	aminotransferase	Cytoplasmic	metabolism	Amino acid transport and metabolism	1.39007	0.00714706	0.0216906	0.00846623	0.0124346	3	0.00600491	0.00930188	0.0115291	0.0089453	3
OG1RF_12191_2191	GlxR	2-hydroxy-3-oxopropionate reductase	Unknown	metabolism	Lipid transport and metabolism	1.39543	0.0205422	0.00709879	0.0240754	0.0172388	3	0.0130304	0.012452	0.0115788	0.0123538	3
OG1RF_11995_1995	Est	lipase/esterase Est	Cytoplasmic	poorly characterized	General function prediction only	1.40023	0.00622295		0.0053124	0.00576767	2	0.0039606	0.00272064	0.00567601	0.00411908	3
OG1RF_10556_556	Udk	uridine kinase	Cytoplasmic	Purines, pyrimidines, nucleosides, and nucleotides	Salvage of nucleosides and nucleotides	1.41284	0.00748852	0.0168976	0.00507727	0.00982112	3	0.00798114	0.00752775	0.00534515	0.00695135	3
OG1RF_10929_929	OG1RF_10929	site-specific DNA-methyltransferase	Cytoplasmic	DNA metabolism	DNA replication, recombination, and repair	1.4173	0.00572752	0.0151616	0.00558012	0.00882308	3	0.00818721	0.00492777	0.00556079	0.00622526	3
OG1RF_10020_20	ManY	PTS family mannose/fructose/sorbose porter component IIC	Cytoplasmic Membrane	metabolism	Carbohydrate transport and metabolism	1.41801	0.00695113	0.0336166	0.0152928	0.0186202	3	0.00860742	0.0108479	0.0199383	0.0131312	3
OG1RF_12419_2419	YueF	peptidase M16 inactive domain protein	Cytoplasmic	poorly characterized	General function prediction only	1.41846	0.0262667	0.0335792	0.029955	0.0299336	3	0.0112516	0.0294407	0.0226164	0.0211029	3
OG1RF_12207_2207	OG1RF_12207	ABC superfamily ATP binding cassette transporter, ABC protein	Cytoplasmic Membrane	metabolism	Carbohydrate transport and metabolism	1.41952	0.00564755		0.00543808	0.00554281	2	0.00312131	0.00352131	0.00507152	0.00390471	3
OG1RF_10422_422	Cbf	CMP-binding-factor 1	Cytoplasmic	poorly characterized	General function prediction only	1.43352	0.0103993	0.005591	0.00838608	0.00812548	3	0.00261672	0.00693637	0.00745155	0.00566821	3
OG1RF_12508_2508	OG1RF_12508	thiamine biosynthesis lipoprotein	Unknown	metabolism	Coenzyme transport and metabolism	1.44119	0.00659718		0.00455896	0.00557807	2	0.0022301	0.00714168	0.00223963	0.00387047	3
OG1RF_11421_1421	OG1RF_11421	LysR family transcriptional regulator	Cytoplasmic	information storage and processing	Transcription	1.44223	0.00539412	0.0112933	0.00858361	0.00842368	3	0.00644658		0.00523485	0.00584071	2
OG1RF_11204_1204	Pgi	glucose-6-phosphate isomerase	Cytoplasmic	Energy metabolism	Glycolysis/gluconeogenesis	1.44327	0.150468	0.39648	0.122797	0.223249	3	0.176974	0.146671	0.140403	0.154683	3
OG1RF_10502_502	OG1RF_10502	protein of hypothetical function DUF199	Cytoplasmic	Cellular processes	Cell division	1.44961	0.00296659		0.00130392	0.00213525	2	0.000895683	0.00199777	0.0015255	0.00147298	3
OG1RF_11712_1712	TagD	glycerol-3-phosphate cytidylyltransferase	Cytoplasmic	Cell envelope	Biosynthesis and degradation of murein sacculus and peptidoglycan	1.45358	0.021751		0.0113695	0.0165602	2	0.00352413	0.0201157	0.0105384	0.0113927	0
OG1RF_11275_1275	DapB	dihydrodipicolinate reductase	Cytoplasmic	Amino acid biosynthesis	Aspartate family	1.45644	0.00366526		0.00390066	0.00378296	2	0.00228099	0.00190778	0.00360344	0.0025974	0
OG1RF_11854_1854	CzrA	metal transport repressor protein CzrA	Unknown	information storage and processing	Transcription	1.45686	0.0141638		0.010868	0.0125159	2	0.00441368	0.0065305	0.0148288	0.00859099	3
OG1RF_10782_782	Gnd	phosphogluconate dehydrogenase (decarboxylating)	Cytoplasmic	Energy metabolism	Pentose phosphate pathway	1.46335	0.081645	0.149137	0.0731529	0.101312	3	0.0820346	0.0720189	0.0536442	0.0692326	3
OG1RF_11141_1141	PdhA	pyruvate dehydrogenase complex E1 component alpha subunit	Cytoplasmic	Energy metabolism	Pyruvate dehydrogenase	1.47356	0.197012	0.756542	0.335084	0.429546	3	0.332041	0.264526	0.27794	0.291502	3
OG1RF_10712_712	FolD	bifunctional methylenetetrahydrofolate dehydrogenase/methylenetetrahydrofolate cyclohydrolase	Cytoplasmic	Biosynthesis of cofactors, prosthetic groups, and carriers	Folic acid	1.47773	0.01052	0.00442404	0.00450427	0.00648276	3	0.00159729	0.00767329	0.00389034	0.00438697	3
OG1RF_11460_1460	HprK	HPr(Ser) kinase/phosphatase	Cytoplasmic Membrane	Regulatory functions	Protein interactions	1.48014	0.00602799	0.0029762	0.00581261	0.00493893	3	0.00390039	0.00327136	0.00283868	0.00333681	3
OG1RF_12234_2234	ThiI	thiamine biosynthesis/tRNA modification protein ThiI	Cytoplasmic	Biosynthesis of cofactors, prosthetic groups, and carriers	Thiamine	1.48383	0.00516272	0.00605753	0.00370786	0.00497604	3	0.00409322	0.00257339	0.0033939	0.0033535	3
OG1RF_10679_679	OG1RF_10679	hypothetical protein	Unknown	poorly characterized	Function unknown	1.48649	0.00524059		0.00672997	0.00598528	2	0.00300208	0.00392259	0.00515468	0.00402645	3
OG1RF_12157_2157	RpmG2	50S ribosomal protein L33	Unknown	Protein synthesis	Ribosomal proteins: synthesis and modification	1.49473	0.239572	0.0823722	0.291296	0.204414	3	0.124966	0.173767	0.111537	0.136756	3
OG1RF_10957_957	OG1RF_10957	metallo-beta-lactamase superfamily protein	Cytoplasmic	Transcription	Degradation of RNA	1.49662	0.0195482	0.0111063	0.0333569	0.0213371	3	0.0140116	0.014475	0.0142839	0.0142568	3
OG1RF_11876_1876	PanE2	2-dehydropantoate 2-reductase	Cytoplasmic	Biosynthesis of cofactors, prosthetic groups, and carriers	Pantothenate and coenzyme A	1.49695	0.0422508	0.0382729	0.0245559	0.0350265	3	0.0242705	0.0279914	0.0179339	0.0233986	3
OG1RF_11203_1203	GdhA	glutamate dehydrogenase	Cytoplasmic	metabolism	Amino acid transport and metabolism	1.4992	0.00262416	0.00654711	0.00494016	0.00470381	3	0.00341321	0.00315776	0.0028417	0.00313755	3
OG1RF_11041_1041	YlxR	cytosolic protein YlxR	Cytoplasmic	information storage and processing	Transcription	1.51691	0.00465786	0.0108032	0.0079521	0.00780439	3	0.0040998	0.00532618	0.00600883	0.00514494	3
OG1RF_12431_2431	Prs1	phosphoribosyl pyrophosphate synthetase	Cytoplasmic	Purines, pyrimidines, nucleosides, and nucleotides	Purine ribonucleotide biosynthesis	1.53175	0.0434216	0.0788153	0.0383147	0.0535172	3	0.0356715	0.0285244	0.04062	0.0349386	3
OG1RF_11733_1733	RfbC	dTDP-4-dehydrorhamnose 3,5-epimerase	Cytoplasmic	Cell envelope	Biosynthesis and degradation of surface polysaccharides and lipopolysaccharides	1.5327	0.00398186	0.00628365	0.0021668	0.0041441	3	0.00206561	0.00220696	0.00383879	0.00270379	3
OG1RF_10943_943	TrpF	N-(5'phosphoribosyl)anthranilate isomerase	Cytoplasmic	poorly characterized	Function unknown	1.53559	0.00843493	0.00139646	0.00639009	0.00540716	3	0.00293454	0.00281191	0.00481726	0.00352124	3
OG1RF_10946_946	MurA	UDP-N-acetylglucosamine 1-carboxyvinyltransferase	Cytoplasmic	Cell envelope	Biosynthesis and degradation of murein sacculus and peptidoglycan	1.53708	0.00374361	0.0125705	0.00384119	0.00671845	3	0.00334637	0.00483428	0.0049321	0.00437092	3
OG1RF_10919_919	OG1RF_10919	cof family protein	Cytoplasmic	poorly characterized	Enzymes of unknown specificity	1.5519	0.027034	0.0137566	0.0267982	0.0225296	3	0.0134818	0.0122911	0.0177793	0.0145174	3
OG1RF_10232_232	SrpG	cysteine synthase	Unknown	metabolism	Amino acid transport and metabolism	1.56339	0.00167828	0.00996934	0.00552202	0.00572321	3	0.00220622	0.00454624	0.00422988	0.00366078	3
OG1RF_12082_2082	RplA	50S ribosomal protein L1	Cytoplasmic	Protein synthesis	Ribosomal proteins: synthesis and modification	1.56499	0.152868	0.379161	0.178312	0.23678	3	0.14117	0.173245	0.13948	0.151299	3
OG1RF_10091_91	OG1RF_10091	hypothetical protein	Unknown	poorly characterized	Function unknown	1.57068	0.00287063	0.00215349	0.00204266	0.00235559	3	0.000595877	0.00172969	0.00217361	0.00149973	3
OG1RF_11852_1852	ThrC	threonine synthase	Cytoplasmic	Amino acid biosynthesis	Aspartate family	1.57987	0.0261179	0.0153127	0.0295009	0.0236438	3	0.012509	0.0151014	0.0172868	0.0149657	3
OG1RF_11168_1168	OG1RF_11168	SAM-dependent methyltransferase	Cytoplasmic	poorly characterized	General function prediction only	1.58771	0.00202089	0.00442147	0.00397196	0.00347144	3	0.00204412	0.00239728	0.00211792	0.00218644	3
OG1RF_11161_1161	OG1RF_11161	DHH family protein	Cytoplasmic	poorly characterized	General function prediction only	1.59607	0.00380078	0.00483305	0.00203962	0.00355781	3	0.00240274	0.00191419	0.0023704	0.00222911	3
OG1RF_10042_42	GltX	glutamate--tRNA ligase	Cytoplasmic	Protein synthesis	tRNA aminoacylation	1.60289	0.0346437	0.0773189	0.0373449	0.0497691	3	0.0380153	0.0260393	0.0290942	0.0310496	3
OG1RF_11330_1330	GyrA2	DNA topoisomerase (ATP-hydrolyzing) subunit A	Cytoplasmic	DNA metabolism	DNA replication, recombination, and repair	1.60705	0.019024	0.0056582	0.0126033	0.0124285	3	0.00789832	0.00768892	0.00761389	0.00773371	3
OG1RF_10947_947	Rho	transcription termination factor Rho	Cytoplasmic	Transcription	Transcription factors	1.60899	0.00214712	0.00608059	0.00186681	0.00336484	3		0.00211501	0.00206755	0.00209128	2
OG1RF_10185_185	TruA	tRNA-pseudouridine synthase I	Cytoplasmic	Protein synthesis	tRNA and rRNA base modification	1.62825	0.00218652	0.00208631	0.00367608	0.00264964	3	0.00105636	0.00172945	0.00209607	0.00162729	3
OG1RF_12175_2175	OG1RF_12175	RNA-binding protein	Cytoplasmic	poorly characterized	General	1.63102	0.0115681	0.0270859	0.00989601	0.0161833	3	0.00920166	0.0130537	0.00751137	0.00992224	3
OG1RF_12139_2139	OG1RF_12139	hypothetical protein	Unknown	poorly characterized	General	1.63203	0.00144169	0.0201863	0.00440266	0.0086769	3	0.00558423	0.00432816	0.00603749	0.00531663	3
OG1RF_10435_435	OG1RF_10435	hypothetical protein	Cytoplasmic	information storage and processing	Translation, ribosomal structure and biogenesis	1.64996	0.00343985	0.00258535	0.00513103	0.00371874	3	0.00284589	0.00207098	0.00184465	0.00225384	3
OG1RF_12426_2426	YvdM	beta-phosphoglucomutase	Cytoplasmic	Energy metabolism	Biosynthesis and degradation of polysaccharides	1.65033	0.0114813	0.00724326	0.0159738	0.0115661	3	0.00630287	0.00783328	0.00688897	0.00700837	3
OG1RF_11196_1196	OG1RF_11196	ABC superfamily ATP binding cassette transporter, ABC protein	Cytoplasmic Membrane	poorly characterized	General function prediction only	1.65059	0.00343991	0.00209948	0.0040167	0.00318537	3	0.00241503	0.00121128	0.00216319	0.00192983	3
OG1RF_12121_2121	YabA	initiation-control protein YabA	Cytoplasmic	poorly characterized	Function unknown	1.65578	0.000444755	0.00280571	0.00395724	0.00240257	3		0.00119083	0.00171121	0.00145102	2
OG1RF_10206_206	OG1RF_10206	S1 RNA-binding domain protein	Cytoplasmic	information storage and processing	Translation, ribosomal structure and biogenesis	1.65709	0.0112846	0.0906462	0.0256975	0.0425428	3	0.0290104	0.0193787	0.0286302	0.0256731	3
OG1RF_11874_1874	RpsT	30S ribosomal protein S20	Cytoplasmic	Protein synthesis	Ribosomal proteins: synthesis and modification	1.67643	0.0618137	0.143565	0.0822609	0.09588	3	0.0671914	0.0601673	0.0442205	0.0571931	3
OG1RF_12573_2573	OG1RF_12573	GntR family transcriptional regulator	Cytoplasmic	information storage and processing	Transcription	1.71468	0.00314629		0.00189242	0.00251935	2	0.00156778	0.00143914	0.00140093	0.00146929	3
OG1RF_10726_726	MurD	UDP-N-acetylmuramoylalanine--D-glutamate ligase	Cytoplasmic	Cell envelope	Biosynthesis and degradation of murein sacculus and peptidoglycan	1.72279	0.0102287	0.0112982	0.0139374	0.0118214	3	0.00307891	0.00263109	0.0148754	0.0068618	3
OG1RF_10424_424	OG1RF_10424	hypothetical protein	Unknown	poorly characterized	General function prediction only	1.72398	0.00438127	0.00536253	0.00409406	0.00461262	3	0.00269476	0.00155388	0.00377803	0.00267556	3
OG1RF_10001_1	DnaA	ATPase	Cytoplasmic	DNA metabolism	DNA replication, recombination, and repair	1.73159	0.0052457	0.0048313	0.0139505	0.00800917	3	0.00407783	0.00499182	0.00480636	0.00462533	3
OG1RF_10900_900	RnpA	ribonuclease PH/Ham1 protein	Cytoplasmic	Transcription	RNA processing	1.76014	0.00801594	0.0152308	0.00795842	0.0104017	3	0.00500116	0.00431159	0.00841609	0.00590961	3
OG1RF_11169_1169	OG1RF_11169	protein of hypothetical function DUF34	Cytoplasmic	poorly characterized	General	1.77222	0.0121601	0.000986011	0.00519048	0.0061122	3	0.00394195	0.00280929	0.00359542	0.00344889	3
OG1RF_12335_2335	RpsO	30S ribosomal protein S15	Cytoplasmic	Protein synthesis	Ribosomal proteins: synthesis and modification	1.77994	0.100061	0.186584	0.0589195	0.115188	3	0.0804587	0.0574399	0.0562453	0.0647146	3
OG1RF_10006_6	GyrA	DNA topoisomerase (ATP-hydrolyzing) subunit A	Cytoplasmic	DNA metabolism	DNA replication, recombination, and repair	1.79804	0.0130505	0.0358274	0.013443	0.0207736	3	0.00972197	0.0104935	0.014445	0.0115535	3
OG1RF_11919_1919	GcvH	glycine cleavage system H protein	Cytoplasmic	metabolism	Amino acid transport and metabolism	1.8142	0.0170335	0.00505572	0.0239606	0.0153499	3	0.011109	0.0090341	0.00523987	0.008461	3
OG1RF_11691_1691	OG1RF_11691	FemAB family peptidoglycan biosynthesis protein	Cytoplasmic	cellular processes and signaling	Defense mechanisms	1.82711	0.00885603	0.0100711	0.00398355	0.00763689	3	0.00537384	0.00280404	0.00436142	0.00417977	3
OG1RF_12031_2031	OG1RF_12031	integral membrane protein	Cytoplasmic Membrane	poorly characterized	Function unknown	1.83815	0.0100798		0.00417694	0.00712839	2		0.00537466	0.00238138	0.00387802	2
OG1RF_10552_552	RplY	50S ribosomal protein L25	Cytoplasmic	Protein synthesis	Ribosomal proteins: synthesis and modification	1.8845	0.0401496	0.15491	0.0385061	0.0778553	3	0.0416492	0.0438467	0.0384442	0.0413134	3
OG1RF_10653_653	OG1RF_10653	response regulator	Cytoplasmic	cellular processes and signaling	Signal transduction mechanisms	1.91609	0.00303614	0.00418376	0.0013533	0.00285773	3	0.0014153	0.00132439	0.00173463	0.00149144	3
OG1RF_11981_1981	OG1RF_11981	PTS family glucitol/sorbitol porter component IIA	Unknown	metabolism	Carbohydrate transport and metabolism	1.91862	0.00454335	0.011643	0.00842055	0.00820232	3	0.00480074	0.00437887	0.00364573	0.00427512	3
OG1RF_12068_2068	OG1RF_12068	MutT/NUDIX family protein	Cytoplasmic	metabolism	Nucleotide transport and metabolism	1.9391	0.0019199		0.00332833	0.00262412	2	0.00134151	0.00166544	0.00105285	0.00135326	3
OG1RF_11836_1836	AcyP	acylphosphatase	Cytoplasmic	metabolism	Energy production and conversion	1.94831	0.0023423	0.0117949	0.00834587	0.00749435	3	0.0033696	0.00415955	0.00401061	0.00384659	3
OG1RF_10676_676	Pta	phosphate acetyltransferase	Cytoplasmic	Energy metabolism	Other	1.95103	0.102355	0.363689	0.131605	0.199216	3	0.104881	0.0982224	0.10322	0.102108	3
OG1RF_11565_1565	TrmD	tRNA (guanine-N(1)-)-methyltransferase	Cytoplasmic	Protein synthesis	tRNA and rRNA base modification	1.96429	0.00225322		0.0042798	0.00326651	2	0.00107828	0.00186067	0.00204988	0.00166294	0
OG1RF_11935_1935	PrfA	peptide chain release factor RF1	Cytoplasmic	Protein synthesis	Translation factors	1.972	0.0143884	0.079992	0.0127232	0.0357012	3	0.0203805	0.0203234	0.0136083	0.0181041	3
OG1RF_12509_2509	OG1RF_12509	pheromone cAD1 lipoprotein	Unknown	poorly characterized	Function unknown	1.99442	0.0819178	0.0622402	0.051729	0.0652956	3	0.0133673	0.0209935	0.0638568	0.0327392	3
OG1RF_12037_2037	CutC	copper homeostasis protein CutC	Cytoplasmic	metabolism	Inorganic ion transport and metabolism	2.0078	0.00747525	0.035516	0.0103513	0.0177809	3	0.00727613	0.0106456	0.00864591	0.00885588	3
OG1RF_11690_1690	OG1RF_11690	hypothetical protein	Cytoplasmic	poorly characterized	Function unknown	2.01398	0.00571925	0.0342	0.00549967	0.0151396	3	0.00987266		0.00516189	0.00751728	2
OG1RF_11846_1846	PhoH	PhoH family protein	Cytoplasmic	cellular processes and signaling	Signal transduction mechanisms	2.05235	0.00749122		0.00210404	0.00479763	2	0.00257673	0.00197184	0.00246431	0.00233763	3
OG1RF_12297_2297	TruA2	tRNA-pseudouridine synthase I	Cytoplasmic	Protein synthesis	tRNA and rRNA base modification	2.05617	0.00134275	0.00416937	0.0031904	0.00290084	3		0.0014105	0.00141109	0.0014108	2
OG1RF_10672_672	OG1RF_10672	GNAT family acetyltransferase	Cytoplasmic	poorly characterized	General function prediction only	2.06139	0.00837728	0.00160895	0.00441428	0.00480017	3		0.00252272	0.00213451	0.00232861	2
OG1RF_12566_2566	CitD	citrate lyase acyl carrier protein	Cytoplasmic	Energy metabolism	Fermentation	2.09055	0.0788651	0.0406425	0.0214946	0.0470007	3	0.0132522	0.0135374	0.0406579	0.0224825	3
OG1RF_12369_2369	OG1RF_12369	ABC superfamily ATP binding cassette transporter, ABC protein	Cytoplasmic Membrane	poorly characterized	General function prediction only	2.09618	0.00265718	0.010661	0.0021109	0.00514302	3	0.00399569	0.000911354		0.00245352	2
OG1RF_10675_675	Ung2	uracil-DNA glycosylase	Cytoplasmic	DNA metabolism	DNA replication, recombination, and repair	2.10193	0.0015523	0.00813812	0.00318813	0.00429285	3	0.00195774	0.00179493	0.00237435	0.00204234	3
OG1RF_11400_1400	Apt	adenine phosphoribosyltransferase	Cytoplasmic	Purines, pyrimidines, nucleosides, and nucleotides	Salvage of nucleosides and nucleotides	2.1087	0.0147641	0.042298	0.0067928	0.021285	3	0.0122255	0.00884575	0.00921033	0.0100939	3
OG1RF_11099_1099	OG1RF_11099	GntR family transcriptional regulator	Cytoplasmic	information storage and processing	Transcription	2.13141	0.0239017	0.00224248	0.0129295	0.0130246	3	0.00461003	0.00834965	0.00537268	0.00611079	3
OG1RF_10495_495	OG1RF_10495	ABC superfamily ATP binding cassette transporter, ABC protein	Cytoplasmic Membrane	metabolism	Amino acid transport and metabolism	2.14088	0.0025186	0.00696982	0.00182233	0.00377025	3	0.00216567	0.00103779	0.00207977	0.00176108	3
OG1RF_11470_1470	PstS2	phosphate ABC superfamily ATP binding cassette transporter, binding protein	Cytoplasmic Membrane	Transport and binding proteins	Anions	2.18474	0.00149492		0.00627629	0.00388561	2	0.0014946	0.00105357	0.00278739	0.00177852	0
OG1RF_11152_1152	AtoB	acetyl-CoA acetyltransferase	Cytoplasmic	Fatty acid and phospholipid metabolism	Other	2.25337	0.00759872	0.00322412	0.00993009	0.00691764	3	0.00401219	0.00326979	0.00192774	0.00306991	3
OG1RF_10639_639	OppF	ABC superfamily ATP binding cassette transporter, ABC protein	Cytoplasmic Membrane	Transport and binding proteins	Amino acids, peptides and amines	2.37399	0.00743869	0.0123934	0.00518469	0.00833893	3	0.0013517	0.00396742	0.00521873	0.00351262	3
OG1RF_11277_1277	OG1RF_11277	hypothetical protein	Unknown	poorly characterized	General function prediction only	2.52903	0.002077	0.00767333	0.00301872	0.00425635	3	0.00220725	0.00174733	0.00109439	0.00168299	3
OG1RF_11409_1409	OG1RF_11409	NADPH-dependent FMN reductase domain protein	Unknown	poorly characterized	General function prediction only	2.54429	0.0194209		0.0189131	0.019167	2	0.00355126	0.00489891	0.0141499	0.00753335	0
OG1RF_10624_624	Tgt	tRNA-guanine transglycosylase	Cytoplasmic	Protein synthesis	tRNA and rRNA base modification	2.60603	0.00952112	0.0462331	0.0122377	0.022664	3	0.00867594	0.010252	0.00716229	0.00869674	3
OG1RF_10431_431	FruK	1-phosphofructokinase	Unknown	metabolism	Carbohydrate transport and metabolism	2.64867	0.0155455	0.02298	0.0100669	0.0161975	3	0.00741561	0.00395427	0.00697608	0.00611532	3
OG1RF_11259_1259	RluB	ribosomal large subunit pseudouridine synthase B	Cytoplasmic	Protein synthesis	tRNA and rRNA base modification	2.77734	0.00298806	0.00409524	0.0395873	0.0155569	3	0.00662763	0.00447852	0.00569791	0.00560135	3
OG1RF_10888_888	OG1RF_10888	YkgG family protein	Cytoplasmic	poorly characterized	Function unknown	2.80931	0.0128603	0.00422642	0.00995878	0.00901518	3	0.00269601	0.00268442	0.00424669	0.00320904	3
OG1RF_11202_1202	OG1RF_11202	pyridine nucleotide-disulfide oxidoreductase	Cytoplasmic	poorly characterized	Enzymes of unknown specificity	2.8573	0.00111527		0.00447219	0.00279373	2	0.000802768	0.00072928	0.00140121	0.000977752	0
OG1RF_11796_1796	PurK2	phosphoribosylaminoimidazole carboxylase ATPase subunit PurK	Cytoplasmic Membrane	metabolism	Nucleotide transport and metabolism	2.86288	0.00299412	0.00879868	0.000447656	0.00408015	3		0.00153246	0.00131792	0.00142519	2
OG1RF_11629_1629	YwlG	YwlG protein	Cytoplasmic	poorly characterized	Conserved	2.91219	0.0106532	0.0485117	0.0174687	0.0255445	3	0.00938525	0.00283996	0.0140896	0.0087716	3
OG1RF_12265_2265	NylA	amidase	Cytoplasmic	information storage and processing	Translation, ribosomal structure and biogenesis	2.9433	0.00138401	0.00343953	0.00580688	0.00354347	3	0.000884575	0.000775542	0.00195161	0.00120391	3
OG1RF_10461_461	GatC	glutamyl-tRNA(Gln) amidotransferase subunit C	Cytoplasmic	Protein synthesis	tRNA aminoacylation	3.03013	0.0200264	0.0861828	0.0168327	0.0410139	3	0.00628028	0.0160415	0.0182843	0.0135354	3
OG1RF_11428_1428	CarA	carbamoyl-phosphate synthase, small subunit	Cytoplasmic	Purines, pyrimidines, nucleosides, and nucleotides	Pyrimidine ribonucleotide biosynthesis	3.2941	0.00706137	0.0265534	0.0184048	0.0173399	3	0.00326521	0.00325648	0.00927008	0.00526392	3
OG1RF_11193_1193	TrxA	thioredoxin	Cytoplasmic	Energy metabolism	Electron transport	3.53785	0.00214707	0.0766908	0.00375306	0.0275303	3	0.00667562	0.00888767		0.00778164	2
OG1RF_11430_1430	PyrB	aspartate carbamoyltransferase, catalytic subunit	Cytoplasmic	Purines, pyrimidines, nucleosides, and nucleotides	Pyrimidine ribonucleotide biosynthesis	3.79453	0.00724651	0.00573753	0.00281644	0.00526683	3		0.00169459	0.00108142	0.001388	2
OG1RF_12215_2215	PabC	aminodeoxychorismate lyase	Unknown	poorly characterized	Conserved	4.12473	0.00264383		0.0148949	0.00876936	2	0.001213	0.000819902	0.00434524	0.00212605	3
OG1RF_10433_433	OG1RF_10433	PTS family fructose/mannitol (fru) porter component IIA	Cytoplasmic Membrane	Transport and binding proteins	Carbohydrates, organic alcohols, and acids	4.18753	0.0204486	0.0296854	0.0180129	0.0227156	3	0.00473854	0.00624144	0.00529378	0.00542459	3
OG1RF_11745_1745	OG1RF_11745	protein of hypothetical function DUF1696	Unknown	poorly characterized	Function unknown	4.59328	0.00121401	0.0317143	0.0026132	0.0118472	3	0.00263357	0.00271614	0.002388	0.00257924	3
AAM75251.1_45	EF0046	Cyl M		Cellular processes	Toxin production and resistance	off D27	off	off	off	0		0.00142602	0.00177114	0.00161794	0.00160503	0
AAM75258.1_52	EF0053	Hypothetical		poorly characterized	Function unknown	off D27	off	off	off	0		0.0184073	0.0351577	0.0344497	0.0293382	0
AAM75260.1_54	EF0055	Gls24-like		poorly characterized	Function unknown	off D27	off	off	off	0		0.352941	0.363731	0.358841	0.358504	0
AAM75261.1_55	EF0056	Esp		poorly characterized	General function prediction only	off D27	off	off	off	0		0.00234831	0.0025371		0.00244271	2
AAM75284.1_78	EF0080	PTS component		metabolism	Carbohydrate transport and metabolism	off D27	off	off	off	0		0.00146623		0.00118149	0.00132386	2
AAM75325.1_119	EF0124	Putative ornithine cyclodeaminase		metabolism	Amino acid transport and metabolism	off D27	off	off	off	0		0.00126739	0.00112492	0.00109128	0.0011612	0
OG1RF_10018_18	ManX	PTS family mannose/fructose/sorbose porter component IIB	Cytoplasmic	Transport and binding proteins	Carbohydrates, organic alcohols, and acids	off D27	off	off	off	0		0.000975705	0.00136124		0.00116847	2
OG1RF_10063_63	OG1RF_10063	N-acylglucosamine-6-phosphate 2-epimerase	Cytoplasmic	metabolism	Carbohydrate transport and metabolism	off D27	off	off	off	0		0.00346151	0.0041321	0.00177834	0.00312398	0
OG1RF_10064_64	OG1RF_10064	glycoside hydrolase family protein	Cytoplasmic Membrane	metabolism	Carbohydrate transport and metabolism	off D27	off	off	off	0		0.0030831	0.00433296	0.00391773	0.00377793	0
OG1RF_10118_118	Rsmc	methyltransferase domain protein	Cytoplasmic	information storage and processing	Translation, ribosomal structure and biogenesis	off D27	off	off	off	0		0.00150414	0.00167668		0.00159041	2
OG1RF_10191_191	OG1RF_10191	amino acid ABC superfamily ATP binding cassette transporter, membrane protein	Cytoplasmic Membrane	Transport and binding proteins	Amino acids, peptides and amines	off D27	off	off	off	0		0.00320168	0.00543207	0.00677474	0.00513616	0
OG1RF_10195_195	OG1RF_10195	maltose O-acetyltransferase	Cytoplasmic	Amino acid biosynthesis	Aromatic amino acid family	off D27	off	off	off	0		0.00812049	0.00611854	0.00338084	0.00587329	0
OG1RF_10200_200	Pth	aminoacyl-tRNA hydrolase	Cytoplasmic	Protein synthesis	Other	off D27	off	off	off	0		0.00151838	0.00135645	0.00159877	0.0014912	0
OG1RF_10201_201	TrcF	transcription-repair coupling factor	Cytoplasmic	DNA metabolism	DNA replication, recombination, and repair	off D27	off	off	off	0		0.00316148	0.010003		0.00658225	2
OG1RF_10211_211	Dus	tRNA-dihydrouridine synthase	Cytoplasmic	poorly characterized	General	off D27	off	off	off	0		0.000702427	0.000972314	0.00114739	0.00094071	0
OG1RF_10215_215	Arb	6-phospho-beta-glucosidase	Cytoplasmic	metabolism	Carbohydrate transport and metabolism	off D27	off	off	off	0		0.0132606	0.0083462	0.013396	0.0116676	0
OG1RF_10216_216	BglA	6-phospho-beta-glucosidase	Cytoplasmic	metabolism	Carbohydrate transport and metabolism	off D27	off	off	off	0		0.00560119	0.0130418	0.00158265	0.00674186	0
OG1RF_10217_217	OG1RF_10217	phosphoglycerate mutase	Unknown	metabolism	Carbohydrate transport and metabolism	off D27	off	off	off	0		0.0029748	0.00184052	0.00165067	0.00215533	0
OG1RF_10229_229	OG1RF_10229	fibronectin-binding protein	Unknown	poorly characterized	General function prediction only	off D27	off	off	off	0		0.000461422	0.000630285		0.000545853	2
OG1RF_10234_234	CelA	6-phospho-beta-glucosidase	Cytoplasmic	metabolism	Carbohydrate transport and metabolism	off D27	off	off	off	0		0.00210591	0.000962977	0.000972898	0.00134726	0
OG1RF_10265_265	OG1RF_10265	ankyrin repeat family protein	Unknown	poorly characterized	General function prediction only	off D27	off	off	off	0		0.00371693	0.00187536		0.00279614	2
OG1RF_10271_271	OG1RF_10271	hypothetical protein	Cytoplasmic	metabolism	Energy production and conversion	off D27	off	off	off	0		0.00317175	0.00457255		0.00387215	2
OG1RF_10278_278	AtzC	N-isopropylammelide isopropylaminohydrolase	Cytoplasmic	metabolism	Nucleotide transport and metabolism	off D27	off	off	off	0		0.00215361	0.0026182	0.00607755	0.00361645	0
OG1RF_10282_282	OG1RF_10282	vitamin-B12 independent methionine synthase	Cytoplasmic	metabolism	Amino acid transport and metabolism	off D27	off	off	off	0			0.00157952	0.000650363	0.00111494	2
OG1RF_10332_332	MenF	putative isochorismate synthase	Cytoplasmic	Biosynthesis of cofactors, prosthetic groups, and carriers	Menaquinone and ubiquinone	off D27	off	off	off	0		0.00201961		0.00227666	0.00214814	2
OG1RF_10350_350	OG1RF_10350	transcriptional regulator	Cytoplasmic Membrane	Regulatory functions	Other	off D27	off	off	off	0		0.000930851	0.00132573		0.00112829	2
OG1RF_10362_362	MorA	aldo/keto reductase family protein	Cytoplasmic	poorly characterized	General function prediction only	off D27	off	off	off	0		0.00173756		0.00155766	0.00164761	2
OG1RF_10514_514	RpoN	DNA-directed RNA polymerase sigma subunit RpoN	Cytoplasmic	Transcription	Transcription factors	off D27	off	off	off	0		0.00363351	0.00901992	0.00308003	0.00524449	0
OG1RF_10540_540	OG1RF_10540	oligopeptide ABC superfamily ATP binding cassette transporter, binding protein	Cellwall	metabolism	Amino acid transport and metabolism	off D27	off	off	off	0		0.00340306	0.00217633	0.00396924	0.00318288	0
OG1RF_10554_554	YjjG	HAD-superfamily hydrolase	Cytoplasmic	poorly characterized	General function prediction only	off D27	off	off	off	0			0.000501085	0.00128368	0.000892381	2
OG1RF_10559_559	OG1RF_10559	BglG family transcriptional antiterminator	Cytoplasmic	information storage and processing	Transcription	off D27	off	off	off	0			0.00575518	0.00463047	0.00519283	2
OG1RF_10608_608	CoaE	dephospho-CoA kinase	Cytoplasmic	Biosynthesis of cofactors, prosthetic groups, and carriers	Pantothenate and coenzyme A	off D27	off	off	off	0		0.000948056	0.00098942	0.00312185	0.00168644	0
OG1RF_10646_646	OG1RF_10646	GNAT family acetyltransferase	Unknown	poorly characterized	General function prediction only	off D27	off	off	off	0			0.00214239	0.00170042	0.0019214	2
OG1RF_10651_651	OG1RF_10651	hypothetical protein	Unknown	poorly characterized	Function unknown	off D27	off	off	off	0			0.00233157	0.00114417	0.00173787	2
OG1RF_10660_660	Rep	ATP-dependent DNA helicase	Cytoplasmic Membrane	poorly characterized	General function prediction only	off D27	off	off	off	0		0.000823252	0.00362999		0.00222662	2
OG1RF_10680_680	OG1RF_10680	LacI family sugar-binding transcriptional regulator	Cytoplasmic	information storage and processing	Transcription	off D27	off	off	off	0			0.00136438	0.002664	0.00201419	2
OG1RF_10683_683	Map	family 65 glycosyl hydrolase	Cytoplasmic	metabolism	Carbohydrate transport and metabolism	off D27	off	off	off	0		0.00181617	0.00181987	0.0030983	0.00224478	0
OG1RF_10732_732	OG1RF_10732	hypothetical protein	Unknown	poorly characterized	Function unknown	off D27	off	off	off	0		0.00130362	0.000820956	0.00097394	0.00103284	0
OG1RF_10757_757	PpdK	pyruvate phosphate dikinase	Cytoplasmic	Energy metabolism	Other	off D27	off	off	off	0		0.00424949	0.00644371	0.00573634	0.00547652	0
OG1RF_10780_780	OG1RF_10780	nucleic acid-binding protein	Unknown	poorly characterized	General function prediction only	off D27	off	off	off	0		0.00348834	0.00371513	0.00339388	0.00353245	0
OG1RF_10910_910	OG1RF_10910	CBS domain protein	Unknown	information storage and processing	Transcription	off D27	off	off	off	0		0.00416867	0.00187371	0.00214699	0.00272979	0
OG1RF_10921_921	OG1RF_10921	lipoate--protein ligase A	Cytoplasmic	metabolism	Coenzyme transport and metabolism	off D27	off	off	off	0			0.00470494	0.0016722	0.00318857	2
OG1RF_10960_960	OG1RF_10960	HAD-superfamily subfamily IIA hydrolase	Unknown	poorly characterized	Enzymes of unknown specificity	off D27	off	off	off	0		0.00311658	0.000857669		0.00198712	2
OG1RF_11089_1089	OG1RF_11089	hypothetical protein	Cytoplasmic	poorly characterized	Function unknown	off D27	off	off	off	0		0.00347801	0.00208905		0.00278353	2
OG1RF_11130_1130	OG1RF_11130	pheromone cAM373 lipoprotein	Unknown	poorly characterized	Function unknown	off D27	off	off	off	0		0.00189336		0.0067303	0.00431183	2
OG1RF_11150_1150	OG1RF_11150	hypothetical protein	Unknown	poorly characterized	Function unknown	off D27	off	off	off	0			0.00228742	0.0147759	0.00853164	2
OG1RF_11253_1253	Tig2	peptidylprolyl isomerase	Unknown	Protein fate	Protein folding and stabilization	off D27	off	off	off	0		0.00201372	0.00191407		0.0019639	2
OG1RF_11276_1276	Cca	tRNA adenylyltransferase	Cytoplasmic	information storage and processing	Translation, ribosomal structure and biogenesis	off D27	off	off	off	0		0.0020632	0.00143198	0.00391886	0.00247135	0
OG1RF_11294_1294	OG1RF_11294	ABC superfamily ATP binding cassette transporter, ABC protein	Cytoplasmic	Protein fate	Protein and peptide secretion and trafficking	off D27	off	off	off	0		0.00164591	0.00725984	0.00360803	0.00417126	0
OG1RF_11306_1306	OG1RF_11306	MutT/NUDIX family protein	Unknown	metabolism	Nucleotide transport and metabolism	off D27	off	off	off	0		0.00312076	0.00312533	0.00866477	0.00497029	0
OG1RF_11317_1317	ScrA	PTS family beta-glucosides porter, IIABC component	Cytoplasmic Membrane	metabolism	Carbohydrate transport and metabolism	off D27	off	off	off	0		0.00409992	0.00470726	0.00543806	0.00474841	0
OG1RF_11414_1414	PhoP	response regulator	Cytoplasmic	cellular processes and signaling	Signal transduction mechanisms	off D27	off	off	off	0		0.00330087	0.0069496	0.0025944	0.00428162	0
OG1RF_11641_1641	RarA	replication-associated recombination protein A	Cytoplasmic	DNA metabolism	DNA replication, recombination, and repair	off D27	off	off	off	0		0.00157556	0.00287061		0.00222308	2
OG1RF_11674_1674	OG1RF_11674	hypothetical protein	Unknown	poorly characterized	Function unknown	off D27	off	off	off	0		0.00878893	0.0112386	0.0116137	0.0105471	0
OG1RF_11675_1675	IscS2	cysteine desulfurase	Cytoplasmic	metabolism	Amino acid transport and metabolism	off D27	off	off	off	0		0.00139702	0.00355865	0.00347697	0.00281088	0
OG1RF_11697_1697	OG1RF_11697	hypothetical protein	Unknown	poorly characterized	Function unknown	off D27	off	off	off	0			0.00253493	0.00548768	0.0040113	2
OG1RF_11706_1706	OG1RF_11706	group 2 glycosyl transferase	Cytoplasmic Membrane	Cell envelope	Biosynthesis and degradation of surface polysaccharides and lipopolysaccharides	off D27	off	off	off	0			0.00144577	0.00205418	0.00174997	2
OG1RF_11721_1721	OG1RF_11721	bacterial sugar transferase	Cytoplasmic Membrane	Cell envelope	Biosynthesis and degradation of surface polysaccharides and lipopolysaccharides	off D27	off	off	off	0		0.00311884	0.00071771	0.000877693	0.00157142	0
OG1RF_11755_1755	OG1RF_11755	hypothetical protein	Cytoplasmic	poorly characterized	Function unknown	off D27	off	off	off	0		0.00432372	0.00539965	0.00443096	0.00471811	0
OG1RF_11778_1778	OG1RF_11778	LacI family sugar-binding transcriptional regulator	Cytoplasmic	information storage and processing	Transcription	off D27	off	off	off	0		0.000532805		0.0013643	0.000948554	2
OG1RF_11789_1789	OG1RF_11789	DNA binding protein	Cytoplasmic	metabolism	Carbohydrate transport and metabolism	off D27	off	off	off	0			0.00396735	0.00323647	0.00360191	2
OG1RF_11804_1804	OG1RF_11804	gfo/Idh/MocA family oxidoreductase	Cytoplasmic	poorly characterized	General function prediction only	off D27	off	off	off	0		0.00187164	0.00171841		0.00179503	2
OG1RF_11826_1826	OG1RF_11826	NifU family SUF system FeS assembly protein	Cytoplasmic	Biosynthesis of cofactors, prosthetic groups, and carriers	Other	off D27	off	off	off	0		0.00211312	0.0129137	0.00190973	0.00564553	0
OG1RF_11869_1869	OG1RF_11869	PTS system, IIA component	Cytoplasmic Membrane	Transport and binding proteins	Carbohydrates, organic alcohols, and acids	off D27	off	off	off	0		0.00244791		0.00302043	0.00273417	2
OG1RF_11907_1907	OG1RF_11907	penicillin-binding protein 4	Cytoplasmic Membrane	Cell envelope	Biosynthesis and degradation of surface polysaccharides and lipopolysaccharides	off D27	off	off	off	0		0.00740029	0.00915548	0.0135506	0.0100355	0
OG1RF_11933_1933	OG1RF_11933	Sua5/YciO/YrdC/YwlC family protein	Unknown	Protein synthesis	tRNA and rRNA base modification	off D27	off	off	off	0		0.00132947		0.00124329	0.00128638	2
OG1RF_11964_1964	MurE2	UDP-N-acetylmuramoylalanyl-D-glutamate--2,6-diaminopimelate ligase	Unknown	Cell envelope	Biosynthesis and degradation of surface polysaccharides and lipopolysaccharides	off D27	off	off	off	0		0.00134662	0.00155417	0.00357856	0.00215978	0
OG1RF_11966_1966	RihB	purine nucleosidase	Cytoplasmic	metabolism	Nucleotide transport and metabolism	off D27	off	off	off	0		0.00569302	0.00534683	0.00468364	0.00524116	0
OG1RF_11975_1975	BglH	beta-glucosidase	Cytoplasmic	metabolism	Carbohydrate transport and metabolism	off D27	off	off	off	0		0.0107816	0.00965169	0.0143647	0.0115993	0
OG1RF_11976_1976	BglF	PTS family porter, enzyme I	Cytoplasmic Membrane	metabolism	Carbohydrate transport and metabolism	off D27	off	off	off	0		0.00157014	0.00270878	0.00333643	0.00253845	0
OG1RF_11977_1977	LicT2	transcription antiterminator LicT	Cytoplasmic	information storage and processing	Transcription	off D27	off	off	off	0		0.00172165	0.00144409		0.00158287	2
OG1RF_11993_1993	SmpB	SsrA-binding protein	Unknown	Protein synthesis	Other	off D27	off	off	off	0		0.00228964	0.002471	0.00413766	0.0029661	0
OG1RF_12011_2011	OG1RF_12011	ABC superfamily ATP binding cassette transporter, ABC protein	Cytoplasmic	Protein fate	Protein and peptide secretion and trafficking	off D27	off	off	off	0		0.0019164	0.0018735	0.00248185	0.00209059	0
OG1RF_12042_2042	CyaA	adenylate cyclase	Cytoplasmic	poorly characterized	Function unknown	off D27	off	off	off	0		0.00355404	0.00295756	0.00259306	0.00303489	0
OG1RF_12060_2060	OG1RF_12060	acyltransferase	Unknown	metabolism	Lipid transport and metabolism	off D27	off	off	off	0		0.00138699	0.00238824	0.00381996	0.00253173	0
OG1RF_12070_2070	OG1RF_12070	hypothetical protein	Cytoplasmic	poorly characterized	Function unknown	off D27	off	off	off	0		0.00149505	0.00160333	0.00111918	0.00140585	0
OG1RF_12156_2156	OG1RF_12156	hypothetical protein	Cytoplasmic	poorly characterized	Function unknown	off D27	off	off	off	0		0.0116901	0.0154509	0.0135311	0.0135574	0
OG1RF_12164_2164	OG1RF_12164	ErfK/YbiS/YcfS/YnhG family protein	Unknown	poorly characterized	Function unknown	off D27	off	off	off	0		0.00134268	0.00094112	0.00242004	0.00156795	0
OG1RF_12177_2177	YqeG	HAD superfamily phosphatase	Unknown	poorly characterized	General function prediction only	off D27	off	off	off	0			0.00275605	0.0110156	0.00688581	2
OG1RF_12227_2227	OG1RF_12227	HAD superfamily hydrolase	Cytoplasmic	poorly characterized	Enzymes of unknown specificity	off D27	off	off	off	0		0.000462235	0.00111483	0.000681699	0.000752923	0
OG1RF_12254_2254	OG1RF_12254	amidinotransferase	Cytoplasmic	metabolism	Amino acid transport and metabolism	off D27	off	off	off	0			0.00111645	0.00124087	0.00117866	2
OG1RF_12310_2310	OG1RF_12310	peptidase propeptide and YPEB domain protein	Cytoplasmic Membrane	poorly characterized	Function unknown	off D27	off	off	off	0		0.00423437	0.00388687	0.00191252	0.00334459	0
OG1RF_12326_2326	OG1RF_12326	hypothetical protein	Cytoplasmic	poorly characterized	Function unknown	off D27	off	off	off	0			0.00103647	0.00141452	0.00122549	2
OG1RF_12349_2349	PepT2	tripeptide aminopeptidase	Cytoplasmic	Protein fate	Degradation of proteins, peptides, and glycopeptides	off D27	off	off	off	0		0.00227378	0.00185728	0.00278958	0.00230688	0
OG1RF_12350_2350	OG1RF_12350	oligopeptide ABC superfamily ATP binding cassette transporter, binding protein	Cellwall	metabolism	Amino acid transport and metabolism	off D27	off	off	off	0		0.00572466	0.00608111	0.00555527	0.00578701	0
OG1RF_12384_2384	OG1RF_12384	non-specific serine/threonine protein kinase	Cytoplasmic Membrane	poorly characterized	General function prediction only	off D27	off	off	off	0		0.00145751		0.00209467	0.00177609	2
OG1RF_12403_2403	GldA2	putative glycerol dehydrogenase	Cytoplasmic Membrane	metabolism	Energy production and conversion	off D27	off	off	off	0		0.00262829	0.00140699	0.00148543	0.00184024	0
OG1RF_12432_2432	MsrB	peptide-methionine (R)-S-oxide reductase	Cytoplasmic	Protein fate	Protein modification and repair	off D27	off	off	off	0		0.00773643	0.00413142	0.00831988	0.00672924	0
OG1RF_12475_2475	OG1RF_12475	ABC superfamily ATP binding cassette transporter, ABC protein	Cytoplasmic Membrane	cellular processes and signaling	Defense mechanisms	off D27	off	off	off	0		0.00565812		0.0217551	0.0137066	2
OG1RF_12495_2495	MazE	antitoxin MazE	Unknown	poorly characterized	General function prediction only	off D27	off	off	off	0			0.00511375	0.00424522	0.00467949	2
OG1RF_12526_2526	OG1RF_12526	hypothetical protein	Cytoplasmic	cellular processes and signaling	Signal transduction mechanisms	off D27	off	off	off	0		0.0235285		0.013072	0.0183003	2
AAM75211.1_5	EF0005	Aggregation substance, Asc10		information storage and processing	Translation, ribosomal structure and biogenesis	off UW3114	0.00202583		0.0055966	0.00381121	0	off	off	off	0
OG1RF_10003_3	YaaA	S4 domain protein YaaA	Unknown	DNA metabolism	DNA replication, recombination, and repair	off UW3114	0.00264536		0.00224858	0.00244697	0	off	off	off	0
OG1RF_10014_14	OG1RF_10014	DegV family protein	Cytoplasmic	poorly characterized	General	off UW3114	0.000948293		0.000562163	0.000755228	0	off	off	off	0
OG1RF_10038_38	Dut	dUTP diphosphatase	Cytoplasmic	metabolism	Nucleotide transport and metabolism	off UW3114	0.000278504		0.00474321	0.00251086	0	off	off	off	0
OG1RF_10039_39	RadA	DNA repair protein RadA	Cytoplasmic	DNA metabolism	DNA replication, recombination, and repair	off UW3114	0.00135636	0.00283579	0.00180671	0.00199962	3	off	off	off	0
OG1RF_10040_40	OG1RF_10040	PIN domain protein	Cytoplasmic Membrane	poorly characterized	General function prediction only	off UW3114	0.0020878		0.000886414	0.0014871	0	off	off	off	0
OG1RF_10086_86	OG1RF_10086	M protein trans-acting positive regulator	Cytoplasmic	poorly characterized	General function prediction only	off UW3114	0.00269704		0.00543821	0.00406763	0	off	off	off	0
OG1RF_10097_97	OG1RF_10097	ArgR family transcriptional regulator	Cytoplasmic	information storage and processing	Transcription	off UW3114	0.00302145		0.00240097	0.00271121	0	off	off	off	0
OG1RF_10160_160	RpsQ	30S ribosomal protein S17	Cytoplasmic	Protein synthesis	Ribosomal proteins: synthesis and modification	off UW3114	0.00463692	0.0422313	0.00147362	0.0161139	3	off	off	off	0
OG1RF_10174_174	RpmJ	50S ribosomal protein L36	Cytoplasmic	Protein synthesis	Ribosomal proteins: synthesis and modification	off UW3114	0.0612815		0.0482943	0.0547879	0	off	off	off	0
OG1RF_10181_181	OG1RF_10181	M20D family peptidase	Cytoplasmic	Protein fate	Degradation of proteins, peptides, and glycopeptides	off UW3114	0.00204806		0.00322832	0.00263819	0	off	off	off	0
OG1RF_10183_183	OG1RF_10183	ABC superfamily ATP binding cassette transporter, ABC protein	Cytoplasmic Membrane	Transport and binding proteins	Unknown substrate	off UW3114	0.00157232		0.000835096	0.00120371	0	off	off	off	0
OG1RF_10196_196	OG1RF_10196	transcriptional regulator	Cytoplasmic	poorly characterized	General function prediction only	off UW3114	0.00141637		0.00111664	0.0012665	0	off	off	off	0
OG1RF_10197_197	AmiD	N-acetylmuramoyl-L-alanine amidase	Cytoplasmic Membrane	Cell envelope	Surface structures	off UW3114	0.00513345	0.00510108	0.00717946	0.00580467	3	off	off	off	0
OG1RF_10237_237	OG1RF_10237	riboflavin biosynthesis protein RibD domain protein	Cytoplasmic Membrane	metabolism	Coenzyme transport and metabolism	off UW3114	0.00414899		0.00148027	0.00281463	0	off	off	off	0
OG1RF_10269_269	OG1RF_10269	hypothetical protein	Unknown	metabolism	Lipid transport and metabolism	off UW3114	0.00153817		0.00147409	0.00150613	0	off	off	off	0
OG1RF_10298_298	MtlD	mannitol-1-phosphate 5-dehydrogenase	Cytoplasmic	metabolism	Carbohydrate transport and metabolism	off UW3114	0.00272155	0.0020061	0.00277802	0.00250189	3	off	off	off	0
OG1RF_10363_363	OG1RF_10363	glyoxalase	Cytoplasmic	metabolism	Amino acid transport and metabolism	off UW3114	0.000733067	0.0109728	0.0029057	0.00487052	3	off	off	off	0
OG1RF_10389_389	OG1RF_10389	Xaa-Pro aminopeptidase	Cytoplasmic	metabolism	Amino acid transport and metabolism	off UW3114	0.00673533	0.00474215	0.00236405	0.00461384	3	off	off	off	0
OG1RF_10430_430	OG1RF_10430	RpiR family phosphosugar-binding transcriptional regulator	Cytoplasmic	information storage and processing	Transcription	off UW3114	0.000804977	0.0115678	0.00132426	0.00456566	3	off	off	off	0
OG1RF_10475_475	OG1RF_10475	deoxynucleoside kinase	Unknown	metabolism	Nucleotide transport and metabolism	off UW3114	0.00109638		0.00143702	0.0012667	0	off	off	off	0
OG1RF_10503_503	OG1RF_10503	PEP phosphonomutase family protein	Cytoplasmic	metabolism	Amino acid transport and metabolism	off UW3114	0.00517969	0.0134533	0.00584013	0.00815771	3	off	off	off	0
OG1RF_10533_533	Lyzl6	cell wall lysis protein	Extracellular	Cellular processes	Sporulation and germination	off UW3114	0.00358956	0.00941848	0.00261786	0.00520864	3	off	off	off	0
OG1RF_10542_542	OG1RF_10542	hypothetical protein	Cytoplasmic Membrane	poorly characterized	Function unknown	off UW3114	0.00326441		0.00379797	0.00353119	0	off	off	off	0
OG1RF_10546_546	OG1RF_10546	GntR family transcriptional regulator	Cytoplasmic	information storage and processing	Transcription	off UW3114	0.00338146		0.00260254	0.002992	0	off	off	off	0
OG1RF_10580_580	OG1RF_10580	PemK family transcriptional regulator	Cytoplasmic	cellular processes and signaling	Signal transduction mechanisms	off UW3114	0.00171325		0.0015514	0.00163233	0	off	off	off	0
OG1RF_10677_677	OG1RF_10677	ATP/GTP hydrolase	Cytoplasmic	Protein synthesis	tRNA and rRNA base modification	off UW3114	0.00367609		0.00111046	0.00239328	0	off	off	off	0
OG1RF_10681_681	OG1RF_10681	aldose 1-epimerase	Unknown	metabolism	Carbohydrate transport and metabolism	off UW3114	0.00190576		0.00127982	0.00159279	0	off	off	off	0
OG1RF_10714_714	XseB	exodeoxyribonuclease VII small subunit	Cytoplasmic	DNA metabolism	Degradation of DNA	off UW3114		0.0206978	0.00309169	0.0118947	0	off	off	off	0
OG1RF_10716_716	HlyA	hemolysin A	Cytoplasmic	poorly characterized	General	off UW3114	0.00151908		0.00311335	0.00231621	0	off	off	off	0
OG1RF_10753_753	BglA2	6-phospho-beta-glucosidase	Cytoplasmic	metabolism	Carbohydrate transport and metabolism	off UW3114	0.00174418		0.00203497	0.00188958	0	off	off	off	0
OG1RF_10756_756	RpsI2	30S ribosomal protein S9	Cytoplasmic	Protein synthesis	Ribosomal proteins: synthesis and modification	off UW3114	0.00323862		0.00350828	0.00337345	0	off	off	off	0
OG1RF_10758_758	OG1RF_10758	CBS domain protein	Cytoplasmic	poorly characterized	General function prediction only	off UW3114	0.00159494		0.00965978	0.00562736	0	off	off	off	0
OG1RF_10824_824	OG1RF_10824	UvrD/REP helicase	Cytoplasmic	DNA metabolism	DNA replication, recombination, and repair	off UW3114	0.00206		0.00347196	0.00276598	0	off	off	off	0
OG1RF_10839_839	OG1RF_10839	universal stress protein	Unknown	cellular processes and signaling	Signal transduction mechanisms	off UW3114	0.00297352		0.0020884	0.00253096	0	off	off	off	0
OG1RF_10852_852	GalR	galactose operon repressor GalR	Cytoplasmic	information storage and processing	Transcription	off UW3114	0.000648546		0.00193456	0.00129155	0	off	off	off	0
OG1RF_10867_867	OG1RF_10867	integral membrane protein	Cytoplasmic Membrane	poorly characterized	Function unknown	off UW3114	0.00093428		0.00239278	0.00166353	0	off	off	off	0
OG1RF_10879_879	OG1RF_10879	ABC superfamily ATP binding cassette transporter, ATP-binding/permease protein	Cytoplasmic Membrane	cellular processes and signaling	Defense mechanisms	off UW3114	0.0151384		0.00700684	0.0110726	0	off	off	off	0
OG1RF_10886_886	OG1RF_10886	cysteine-rich domain protein	Cytoplasmic Membrane	metabolism	Energy production and conversion	off UW3114	0.00386614		0.003261	0.00356357	0	off	off	off	0
OG1RF_10887_887	OG1RF_10887	iron-sulfur cluster-binding protein	Cytoplasmic	Energy metabolism	Electron transport	off UW3114	0.00418141	0.0136974	0.00541515	0.00776464	3	off	off	off	0
OG1RF_10899_899	MurI	glutamate racemase	Cytoplasmic	Cell envelope	Biosynthesis and degradation of murein sacculus and peptidoglycan	off UW3114	0.00162403		0.0010575	0.00134076	0	off	off	off	0
OG1RF_10918_918	OG1RF_10918	MutT/NUDIX family protein	Unknown	DNA metabolism	DNA replication, recombination, and repair	off UW3114	0.0017895		0.000998641	0.00139407	0	off	off	off	0
OG1RF_10923_923	RpoE	DNA-directed RNA polymerase sigma subunit RpoE	Cytoplasmic	Transcription	DNA-dependent RNA polymerase	off UW3114	0.00144155	0.0872924	0.0332132	0.0406491	3	off	off	off	0
OG1RF_10930_930	Taq	putative carboxypeptidase Taq	Cytoplasmic	metabolism	Amino acid transport and metabolism	off UW3114	0.00874557	0.00746125	0.0111475	0.00911809	3	off	off	off	0
OG1RF_10931_931	DnaD	putative DNA replication protein DnaD	Cytoplasmic	DNA metabolism	DNA replication, recombination, and repair	off UW3114	0.00207438		0.00429172	0.00318305	0	off	off	off	0
OG1RF_10932_932	Nth	endonuclease III	Cytoplasmic	DNA metabolism	DNA replication, recombination, and repair	off UW3114	0.00108373		0.00135876	0.00122125	0	off	off	off	0
OG1RF_10936_936	CelA4	PTS family porter, enzyme I	Cytoplasmic	metabolism	Carbohydrate transport and metabolism	off UW3114	0.00180896		0.00110307	0.00145601	0	off	off	off	0
OG1RF_10956_956	DapA	dihydrodipicolinate synthase	Cytoplasmic	Amino acid biosynthesis	Aspartate family	off UW3114	0.001764		0.000763198	0.0012636	0	off	off	off	0
OG1RF_10999_999	OG1RF_10999	NADPH-dependent FMN reductase domain protein	Cytoplasmic	poorly characterized	General function prediction only	off UW3114	0.000491196		0.00156293	0.00102706	0	off	off	off	0
OG1RF_11047_1047	OG1RF_11047	cro/CI family transcriptional regulator	Cytoplasmic	information storage and processing	Transcription	off UW3114	0.00159419	0.00362802	0.00182958	0.0023506	3	off	off	off	0
OG1RF_11090_1090	OG1RF_11090	hypothetical protein	Unknown	poorly characterized	Function unknown	off UW3114	0.011131		0.00249623	0.00681362	0	off	off	off	0
OG1RF_11210_1210	AtpE	proton (H+) or sodium (Na+) translocating V-type ATPase (V-ATPase), subunit E	Cytoplasmic	Energy metabolism	ATP-proton motive force interconversion	off UW3114	0.000809627		0.00272583	0.00176773	0	off	off	off	0
OG1RF_11211_1211	AtpC	proton (H+) or sodium (Na+) translocating V-type ATPase (V-ATPase), subunit C	Cytoplasmic	Energy metabolism	ATP-proton motive force interconversion	off UW3114	0.00293648		0.000762835	0.00184965	0	off	off	off	0
OG1RF_11218_1218	OG1RF_11218	hypothetical protein	Cytoplasmic Membrane	poorly characterized	Function unknown	off UW3114		0.00216665	0.00216665	0.00216665	0	off	off	off	0
OG1RF_11245_1245	Fur	ferric uptake regulation protein	Cytoplasmic	metabolism	Inorganic ion transport and metabolism	off UW3114	0.00180642		0.00136906	0.00158774	0	off	off	off	0
OG1RF_11274_1274	YpjD	MazG family protein	Cytoplasmic	poorly characterized	General function prediction only	off UW3114	0.00475647		0.00410505	0.00443076	0	off	off	off	0
OG1RF_11284_1284	TyrA	prephenate dehydrogenase	Cytoplasmic	metabolism	Amino acid transport and metabolism	off UW3114	0.00350521		0.00218723	0.00284622	0	off	off	off	0
OG1RF_11328_1328	PflA	pyruvate formate-lyase activating enzyme	Cytoplasmic	Energy metabolism	Anaerobic	off UW3114	0.00934449	0.00164007	0.0074	0.00612819	3	off	off	off	0
OG1RF_11366_1366	YlqF	ribosome biogenesis GTP-binding protein YlqF	Cytoplasmic Membrane	Protein synthesis	Other	off UW3114	0.00420873		0.00322583	0.00371728	0	off	off	off	0
OG1RF_11394_1394	MsrA2	peptide-methionine-(S)-S-oxide reductase	Unknown	Protein fate	Protein modification and repair	off UW3114	0.0035381		0.00753797	0.00553803	0	off	off	off	0
OG1RF_11420_1420	OG1RF_11420	GntR family sugar-binding transcriptional regulator	Cytoplasmic	information storage and processing	Transcription	off UW3114	0.00104042		0.00162298	0.0013317	0	off	off	off	0
OG1RF_11424_1424	PyrF	orotidine-5'-phosphate decarboxylase	Cytoplasmic	Purines, pyrimidines, nucleosides, and nucleotides	Pyrimidine ribonucleotide biosynthesis	off UW3114	0.0040666	0.00546837	0.00356084	0.00436527	3	off	off	off	0
OG1RF_11425_1425	PyrDB	dihydroorotate oxidase	Cytoplasmic	metabolism	Nucleotide transport and metabolism	off UW3114	0.00205368	0.00125631	0.00268381	0.00199793	3	off	off	off	0
OG1RF_11426_1426	PyrK	dihydroorotate dehydrogenase electron transfer subunit	Cytoplasmic	metabolism	Coenzyme transport and metabolism	off UW3114	0.00146246		0.00259881	0.00203064	0	off	off	off	0
OG1RF_11435_1435	OG1RF_11435	CBS domain protein	Cytoplasmic Membrane	information storage and processing	Transcription	off UW3114	0.00135175		0.00219633	0.00177404	0	off	off	off	0
OG1RF_11473_1473	FtsE	ABC superfamily ATP binding cassette transporter, ABC protein	Cytoplasmic Membrane	Cellular processes	Cell division	off UW3114	0.00209154	0.00155604	0.00235745	0.00200168	3	off	off	off	0
OG1RF_11480_1480	OG1RF_11480	ABC superfamily ATP binding cassette transporter, ABC protein	Unknown	poorly characterized	General function prediction only	off UW3114	0.0020966		2.58052e-05	0.0010612	0	off	off	off	0
OG1RF_11481_1481	CelA5	PTS family cellobiose porter, IIA component	Cytoplasmic	metabolism	Carbohydrate transport and metabolism	off UW3114	0.00504758	0.0035312	0.00760941	0.00539606	3	off	off	off	0
OG1RF_11516_1516	LacD2	tagatose-bisphosphate aldolase 2	Cytoplasmic	Energy metabolism	Biosynthesis and degradation of polysaccharides	off UW3114	0.00245604		0.00309752	0.00277678	0	off	off	off	0
OG1RF_11596_1596	OG1RF_11596	hypothetical protein	Cytoplasmic	poorly characterized	Function unknown	off UW3114	0.0019468		0.00145763	0.00170222	0	off	off	off	0
OG1RF_11631_1631	OG1RF_11631	putative phosphomethylpyrimidine kinase	Cytoplasmic Membrane	metabolism	Coenzyme transport and metabolism	off UW3114	0.00202608	0.00414028	0.0040875	0.00341795	3	off	off	off	0
OG1RF_11637_1637	OG1RF_11637	RsmE family RNA methyltransferase	Cytoplasmic	Protein synthesis	tRNA and rRNA base modification	off UW3114	0.00158841		0.00234222	0.00196531	0	off	off	off	0
OG1RF_11657_1657	OG1RF_11657	ABC superfamily ATP binding cassette transporter, ABC protein	Cytoplasmic Membrane	cellular processes and signaling	Defense mechanisms	off UW3114	0.00229302		0.00337609	0.00283456	0	off	off	off	0
OG1RF_11699_1699	NifJ	pyruvate:ferredoxin oxidoreductase	Cytoplasmic	metabolism	Energy production and conversion	off UW3114	0.00174803	0.00194269	0.00305174	0.00224749	3	off	off	off	0
OG1RF_11746_1746	OG1RF_11746	cytidine/deoxycytidylate deaminase	Cytoplasmic	metabolism	Nucleotide transport and metabolism	off UW3114	0.00347767	0.010383	0.000403803	0.00475483	3	off	off	off	0
OG1RF_11748_1748	PhzF2	phenazine biosynthesis protein PhzF family protein	Cytoplasmic	Cellular processes	Toxin production and resistance	off UW3114	0.00182898		0.00123084	0.00152991	0	off	off	off	0
OG1RF_11752_1752	OG1RF_11752	hypothetical protein	Cytoplasmic	poorly characterized	Function unknown	off UW3114	0.00216431	0.00379423	0.00177631	0.00257829	3	off	off	off	0
OG1RF_11762_1762	OG1RF_11762	carbohydrate ABC superfamily ATP binding cassette transporter, membrane protein	Cytoplasmic Membrane	metabolism	Carbohydrate transport and metabolism	off UW3114	0.00279549		0.00169351	0.0022445	0	off	off	off	0
OG1RF_11774_1774	OG1RF_11774	sugar ABC superfamily ATP binding cassette transporter, sugar-binding protein	Cytoplasmic Membrane	metabolism	Carbohydrate transport and metabolism	off UW3114	0.00329346		0.00140788	0.00235067	0	off	off	off	0
OG1RF_11775_1775	OG1RF_11775	glucuronyl hydrolase	Cytoplasmic	cellular processes and signaling	Posttranslational modification, protein turnover, chaperones	off UW3114	0.00418106	0.00274081	0.00430052	0.0037408	3	off	off	off	0
OG1RF_11807_1807	OG1RF_11807	peptidase propeptide and YPEB domain protein	Cytoplasmic Membrane	poorly characterized	Function unknown	off UW3114	0.0318037		0.0305625	0.0311831	0	off	off	off	0
OG1RF_11867_1867	MurQ2	N-acetylmuramic acid 6-phosphate etherase	Cytoplasmic	Cell envelope	Biosynthesis and degradation of murein sacculus and peptidoglycan	off UW3114	0.0032349	0.00278415	0.00227145	0.0027635	3	off	off	off	0
OG1RF_11872_1872	OG1RF_11872	hypothetical protein	Cytoplasmic	metabolism	Inorganic ion transport and metabolism	off UW3114	0.00152035	0.0110506	0.00299373	0.00518823	3	off	off	off	0
OG1RF_11882_1882	OG1RF_11882	PDZ domain protein	Unknown	cellular processes and signaling	Signal transduction mechanisms	off UW3114	0.0187209		0.00409581	0.0114084	0	off	off	off	0
OG1RF_11903_1903	Gcp	O-sialoglycoprotein endopeptidase	Unknown	Protein synthesis	tRNA and rRNA base modification	off UW3114	0.00352148		0.00279696	0.00315922	0	off	off	off	0
OG1RF_11958_1958	YgeY	M20/DapE family protein YgeY	Cytoplasmic	metabolism	Amino acid transport and metabolism	off UW3114	0.0168061		0.00576898	0.0112876	0	off	off	off	0
OG1RF_11969_1969	AmpC	beta-lactamase	Cytoplasmic Membrane	cellular processes and signaling	Defense mechanisms	off UW3114	0.00160886		0.00189303	0.00175094	0	off	off	off	0
OG1RF_11996_1996	SecG	preprotein translocase subunit SecG	Cytoplasmic Membrane	Protein fate	Protein and peptide secretion and trafficking	off UW3114	0.00210982		0.00243883	0.00227432	0	off	off	off	0
OG1RF_11998_1998	OG1RF_11998	hypothetical protein	Cytoplasmic	poorly characterized	Function unknown	off UW3114	0.00631215		0.00602936	0.00617075	0	off	off	off	0
OG1RF_12028_2028	CoaC	phosphopantothenoylcysteine decarboxylase	Unknown	Biosynthesis of cofactors, prosthetic groups, and carriers	Pantothenate and coenzyme A	off UW3114	0.0017269	0.00140924	0.00139405	0.00151006	3	off	off	off	0
OG1RF_12034_2034	GpmB	phosphoglycerate mutase	Unknown	metabolism	Carbohydrate transport and metabolism	off UW3114	0.00900129		0.011587	0.0102941	0	off	off	off	0
OG1RF_12040_2040	PpnK	NAD(+) kinase	Cytoplasmic	metabolism	Carbohydrate transport and metabolism	off UW3114	0.00124613		0.00233582	0.00179098	0	off	off	off	0
OG1RF_12058_2058	SbcC	exonuclease SbcC	Cytoplasmic Membrane	DNA metabolism	DNA replication, recombination, and repair	off UW3114	0.00554341		0.0638199	0.0346816	0	off	off	off	0
OG1RF_12110_2110	DltC	D-alanine--D-alanyl carrier protein ligase subunit 2	Cytoplasmic	Cell envelope	Biosynthesis and degradation of murein sacculus and peptidoglycan	off UW3114	0.0456537	0.00396868	0.017054	0.0222255	3	off	off	off	0
OG1RF_12120_2120	OG1RF_12120	tetrapyrrole methylase	Cytoplasmic	Protein synthesis	tRNA and rRNA base modification	off UW3114	0.00101653	0.00974703	0.00281668	0.00452674	3	off	off	off	0
OG1RF_12126_2126	RecR	recombination protein R	Cytoplasmic	DNA metabolism	DNA replication, recombination, and repair	off UW3114	0.00069305	0.0137775	0.000914211	0.00512826	3	off	off	off	0
OG1RF_12141_2141	OG1RF_12141	galactose-1-phosphate uridylyltransferase	Unknown	metabolism	Carbohydrate transport and metabolism	off UW3114	0.00307838	0.0028228	0.0034788	0.00312666	0	off	off	off	0
OG1RF_12168_2168	OG1RF_12168	PFL4705 family integrating conjugative element protein	Cytoplasmic Membrane	Cell envelope	Biosynthesis and degradation of surface polysaccharides and lipopolysaccharides	off UW3114	0.00121757		0.00389849	0.00255803	0	off	off	off	0
OG1RF_12171_2171	OG1RF_12171	methyltransferase	Cytoplasmic	metabolism	Coenzyme transport and metabolism	off UW3114	0.00114989		0.00199075	0.00157032	0	off	off	off	0
OG1RF_12181_2181	FabZ2	(3R)-hydroxymyristoyl-[acyl-carrier-protein] dehydratase	Cytoplasmic	Fatty acid and phospholipid metabolism	Biosynthesis	off UW3114	0.0012347	0.0030788	0.00132745	0.00188032	0	off	off	off	0
OG1RF_12195_2195	OG1RF_12195	hypothetical protein	Cytoplasmic	poorly characterized	Function unknown	off UW3114	0.00140862	0.00631788	0.00223914	0.00332188	0	off	off	off	0
OG1RF_12211_2211	OG1RF_12211	DNA-binding response regulator	Cytoplasmic	cellular processes and signaling	Signal transduction mechanisms	off UW3114	0.00207499	0.00238967	0.00192543	0.00213003	0	off	off	off	0
OG1RF_12216_2216	Nt5e	5'-nucleotidase	Unknown	poorly characterized	Enzymes of unknown specificity	off UW3114	0.000651863		0.00387107	0.00226147	0	off	off	off	0
OG1RF_12271_2271	Cdr	coA-disulfide reductase	Cytoplasmic	poorly characterized	General function prediction only	off UW3114	0.00198715	0.00925543		0.00562129	0	off	off	off	0
OG1RF_12282_2282	OG1RF_12282	MarR family transcriptional regulator	Cytoplasmic	information storage and processing	Transcription	off UW3114	0.0098894		0.00180294	0.00584617	0	off	off	off	0
OG1RF_12308_2308	OG1RF_12308	thioredoxin family protein	Cytoplasmic	cellular processes and signaling	Posttranslational modification, protein turnover, chaperones	off UW3114	0.00625157	0.0099104	0.00327026	0.00647741	0	off	off	off	0
OG1RF_12331_2331	OG1RF_12331	secreted lipase	Extracellular	poorly characterized	Function unknown	off UW3114	0.000987444		0.0016121	0.00129977	0	off	off	off	0
OG1RF_12371_2371	AcpP2	acyl carrier protein	Cytoplasmic	Fatty acid and phospholipid metabolism	Biosynthesis	off UW3114	0	0.0424198	0.0479168	0.0301122	0	off	off	off	0
OG1RF_12379_2379	OG1RF_12379	ABC superfamily ATP binding cassette transporter ABC protein	Cytoplasmic Membrane	poorly characterized	General function prediction only	off UW3114	0.00082026		0.00235805	0.00158915	0	off	off	off	0
OG1RF_12380_2380	RpmB2	50S ribosomal protein L28	Cytoplasmic	Protein synthesis	Ribosomal proteins: synthesis and modification	off UW3114	0.004329		0.00345235	0.00389068	0	off	off	off	0
OG1RF_12389_2389	PriA	DNA replication factor Y	Cytoplasmic	DNA metabolism	DNA replication, recombination, and repair	off UW3114	0.00596597		0.0033987	0.00468234	0	off	off	off	0
OG1RF_12395_2395	OG1RF_12395	hypothetical protein	Cytoplasmic	poorly characterized	Function unknown	off UW3114	0.00187896	0.00473927	0.00212842	0.00291555	0	off	off	off	0
OG1RF_12433_2433	Maf	septum formation protein Maf	Cytoplasmic	Cellular processes	Cell division	off UW3114	0.00419909		0.00785255	0.00602582	0	off	off	off	0
OG1RF_12445_2445	OG1RF_12445	hypothetical protein	Unknown	poorly characterized	Function unknown	off UW3114	0.00240367		0.00310743	0.00275555	0	off	off	off	0
OG1RF_12488_2488	Dps	DNA starvation/stationary phase protection protein Dps	Cytoplasmic	metabolism	Inorganic ion transport and metabolism	off UW3114	0.00309085		0.0043477	0.00371928	0	off	off	off	0
OG1RF_12498_2498	BirA	biotin--[acetyl-CoA-carboxylase] ligase	Cytoplasmic	Protein fate	Protein modification and repair	off UW3114	0.00160453		0.00376782	0.00268618	0	off	off	off	0
OG1RF_12527_2527	OG1RF_12527	U32 family peptidase	Cytoplasmic	cellular processes and signaling	Posttranslational modification, protein turnover, chaperones	off UW3114	0.00278834	0.00292561	0.00189077	0.0025349	0	off	off	off	0
OG1RF_12540_2540	OG1RF_12540	hypothetical protein	Cytoplasmic Membrane	poorly characterized	Function unknown	off UW3114	0.00112972		0.00191709	0.00152341	0	off	off	off	0
OG1RF_12561_2561	Mdh2	malate dehydrogenase (oxaloacetate-decarboxylating) (NADP(+))	Cytoplasmic Membrane	metabolism	Energy production and conversion	off UW3114	0.0118215		0.00515092	0.00848623	0	off	off	off	0
OG1RF_12570_2570	OG1RF_12570	sodium ion-translocating decarboxylase	Cytoplasmic	metabolism	Lipid transport and metabolism	off UW3114	0.0264011	0.0739035	0.0490569	0.0497872	0	off	off	off	0
