# Supplementary material for: Detailed Soluble Proteome Analyses of a Dairy-Isolated Enterococcus faecalis: A Possible Approach to Assess Food Safety and Potential Probiotic Value
Source: Front Nutr. 2019 May 17;6:71. doi: 10.3389/fnut.2019.00071 (PMC6533484; doi:10.3389/fnut.2019.00071)
Supplement: Table S3 — The table includes the secreted proteins identified in at least two of the three biological replicates of E. faecalis D27 and E. faecalis Symbioflor 1 and the proteins found only in one E. faecalis strain and absent (off) in the other strain. The fold-change is given by the ratio between the average of the abundance [normalized spectral abundance factor (NSAF)] in E. faecalis D27 and the average of the abundance (NSAF) in E. faecalis Symbioflor 1. Accession, protein name, description, localization (obtained by pSortb), main role and subrole are reported to give information on the protein function. For each protein, the abundance (NSAF) for all the biological replicates are reported for both E. faecalis D27 and E. faecalis Symbioflor 1. [file Table_3.XLSX]

## Sheet: Table S3
a Fold-change is given by the ratio between the average of the protein abundance (fmol/ng) in E. faecalis D27 and the average of the protein abundance (fmol/ng) in E. faecalis Symbioflor 1.
b Protein abundance based on the normalized spectrum abundance factors (NSAF) for each of the three technical replicates (D27_1, D27_2 and D27_3) of E. faecalis D27
c Average of the protein amount for the three techinical replicates of E. faecalis D27
d Number of technical replicates of E. faecalis D27 in which the protein was identified and quantified
e Protein abundance based on the normalized spectrum abundance factors (NSAF) for each of the three technical replicates (Symb1_1, Symb1_2 and Symb1_3) of E. faecalis Symbioflor 1
f Average of the protein amount for the three techinical replicates of E. faecalis Symbioflor 1
g Number of technical replicates of E. faecalis Symbioflor 1 in which the protein was identified and quantified
						QUANTITATIVE RESULTS
PROTEIN DESCRIPTION						Fold-change a D27/Symb.	NSAF b			Average D27 c	Repcount D27 d	NSAF e			Average Symb1 f	Repcount Symb1 g
accession	protein	description	localization pSortb	main role (COG)	subrole (COG)		D27_1	D27_2	D27_3			Symb1_1	Symb1_2	Symb1_3
OG1RF_10011_11	RplI	50S ribosomal protein L9	Cytoplasmic	Protein synthesis	Ribosomal proteins: synthesis and modification	off Symb1	0.020932	0.020646	0.013101	0.0182263	3	off	off	off	off
OG1RF_10044_44	CysS	Cysteine--tRNA ligase (EC 6.1.1.16) (Cysteinyl-tRNA synthetase)	Cytoplasmic	Protein synthesis	tRNA aminoacylation	off Symb1		0.0088114	0.014677	0.0117442	2	off	off	off	off
OG1RF_10006_6	GyrA	DNA gyrase subunit A (EC 5.99.1.3)	Cytoplasmic	DNA metabolism	DNA replication, recombination, and repair	off Symb1	0.010253	0.0088484	0.012032	0.0103778	3	off	off	off	off
OG1RF_10135_135	DeoD	Purine nucleoside phosphorylase DeoD-type (PNP) (EC 2.4.2.1)	Cytoplasmic	Purines, pyrimidines, nucleosides, and nucleotides	Salvage of nucleosides and nucleotides	off Symb1	0.0090855	0.0089614		0.00902345	2	off	off	off	off
OG1RF_10465_465	RumA	23S rRNA (Uracil-5-)-methyltransferase (EC 2.1.1.-)	Cytoplasmic	Protein synthesis	tRNA and rRNA base modification	off Symb1	0.0068432	0.0067497		0.00679645	2	off	off	off	off
OG1RF_11876_1876	PanE2	2-dehydropantoate 2-reductase (EC 1.1.1.169)	Cytoplasmic	Biosynthesis of cofactors, prosthetic groups, and carriers	Pantothenate and coenzyme A	off Symb1	0.017053	0.010092	0.038425	0.0218567	3	off	off	off	off
OG1RF_11282_1282	AroB	3-dehydroquinate synthase	Cytoplasmic	Amino acid biosynthesis	Function unknown	off Symb1		0.0058825	0.0055992	0.00574085	2	off	off	off	off
OG1RF_10552_552	RplY	50S ribosomal protein L25	Cytoplasmic	Protein synthesis	Function unknown	off Symb1	0.036994	0.020851		0.0192817	2	off	off	off	off
OG1RF_10638_638	OppD	ABC superfamily ATP binding cassette transporter, ABC protein	Cytoplasmic Membrane	Transport and binding proteins	Transcription	off Symb1	0.0060656	0.011965	0.0056946	0.0079084	3	off	off	off	off
OG1RF_10639_639	OppF	ABC superfamily ATP binding cassette transporter, ABC protein	Cytoplasmic Membrane	Transport and binding proteins	Amino acids, peptides and amines	off Symb1	0.010071	0.0066224	0.0094552	0.0087162	3	off	off	off	off
OG1RF_11467_1467	PstB2	ABC superfamily ATP binding cassette transporter, ABC protein	Cytoplasmic Membrane	Transport and binding proteins	Function unknown	off Symb1	0.0079371	0.0078287	0.0074517	0.00773917	3	off	off	off	off
OG1RF_11916_1916	MetQ	ABC superfamily ATP binding cassette transporter, binding protein	Cytoplasmic Membrane	metabolism	General function prediction only	off Symb1	0.035323	0.027098	0.025793	0.0294047	3	off	off	off	off
OG1RF_11005_1005	OG1RF_11005_1005	ABC superfamily ATP binding cassette transporter, substrate-binding protein	Unknown	metabolism	Carbohydrate transport and metabolism	off Symb1	0.0080266	0.0059377	0.011304	0.00842277	3	off	off	off	off
OG1RF_12179_2179	AccD	Acetyl-coenzyme A carboxylase carboxyl transferase subunit beta (ACCase subunit beta) (Acetyl-CoA carboxylase carboxyltransferase subunit beta) (EC 6.4.1.2)	Cytoplasmic	Fatty acid and phospholipid metabolism	Biosynthesis	off Symb1	0.014827	0.0073122		0.0110696	2	off	off	off	off
OG1RF_12187_2187	AcpP	acyl carrier protein	Cytoplasmic	Fatty acid and phospholipid metabolism	General	off Symb1	0.18504	0.11232	0.093544	0.130301	3	off	off	off	off
OG1RF_12046_2046	MecA	Adapter protein MecA	Cytoplasmic	cellular processes and signaling	Posttranslational modification, protein turnover, chaperones	off Symb1	0.0097049	0.0095724	0.0091114	0.0094629	3	off	off	off	off
OG1RF_10172_172	Adk	adenylate kinase	Cytoplasmic	Purines, pyrimidines, nucleosides, and nucleotides	Carbohydrate transport and metabolism	off Symb1	0.027728	0.0091165		0.0122815	2	off	off	off	off
OG1RF_10362_362	MorA	aldo/keto reductase family protein	Cytoplasmic	poorly characterized	Translation factors	off Symb1	0.0073371	0.0072368		0.00485797	2	off	off	off	off
OG1RF_11356_1356	OG1RF_11356	aldose epimerase	Cytoplasmic	metabolism	Carbohydrate transport and metabolism	off Symb1	0.02568	0.010855		0.0182675	2	off	off	off	off
OG1RF_10266_266	OG1RF_10266_266	Amidohydrolase (EC 3.5.4.1)	Cytoplasmic	metabolism	Nucleotide transport and metabolism	off Symb1	0.005298	0.0052256		0.0052618	2	off	off	off	off
OG1RF_11417_1417	AspC2	aminotransferase	Cytoplasmic	metabolism	Small molecule interactions	off Symb1	0.00817	0.0080584	0.0051135	0.00711397	3	off	off	off	off
OG1RF_11632_1632	AspS	Aspartate--tRNA ligase (EC 6.1.1.12)	Cytoplasmic	Protein synthesis	tRNA aminoacylation	off Symb1	0.0036249		0.0051049	0.0043649	2	off	off	off	off
OG1RF_10209_209	FtsH	cell division protein FtsH	Cytoplasmic Membrane	Cellular processes	Carbohydrate transport and metabolism	off Symb1	0.0044174	0.0058094	0.0055297	0.00525217	3	off	off	off	off
OG1RF_10732_732	SepF	Cell division protein SepF	Unknown	poorly characterized	Function unknown	off Symb1	0.014492		0.0090702	0.0117811	2	off	off	off	off
OG1RF_12055_2055	OG1RF_12055_2055	Cell surface protein	Cellwall	poorly characterized	Function unknown	off Symb1	0.0029531		0.0027725	0.0028628	2	off	off	off	off
OG1RF_10871_871	OG1RF_10871_871	Cell wall surface anchor family protein	Cellwall	Cell envelope	Biosynthesis and degradation of surface polysaccharides and lipopolysaccharides	off Symb1	0.0647	0.065495	0.043159	0.0577847	3	off	off	off	off
OG1RF_12364_2364	Smc	Chromosome partition protein Smc	Cytoplasmic	Cellular processes	Cell division	off Symb1		0.0053001	0.0042041	0.0047521	2	off	off	off	off
AAM75228.1_22	EF0022	Conserved hypothetical		poorly characterized	Function unknown	off Symb1		0.028204	0.026846	0.027525	2	off	off	off	off
OG1RF_10977_977	OG1RF_10977	cro/CI family TPR domain transcriptional regulator	Cytoplasmic	poorly characterized	General function prediction only	off Symb1	0.022714	0.026137		0.0244255	2	off	off	off	off
OG1RF_10233_233	MetC	cystathionine gamma-synthase	Cytoplasmic	metabolism	Translation factors	off Symb1	0.021676	0.0080175	0.0050876	0.0115937	3	off	off	off	off
OG1RF_10258_258	IscS	Cysteine desulfurase (EC 2.8.1.7)	Cytoplasmic	metabolism	Amino acid transport and metabolism	off Symb1		0.008291	0.0052612	0.0067761	2	off	off	off	off
OG1RF_12112_2112	DltA	D-alanine--poly(phosphoribitol) ligase subunit 1 (EC 6.1.1.13) (D-alanine-D-alanyl carrier protein ligase) (D-alanine-activating enzyme)	Cytoplasmic	Cell envelope	Biosynthesis and degradation of murein sacculus and peptidoglycan	off Symb1	0.0063293	0.0062428		0.00628605	2	off	off	off	off
OG1RF_10606_606	PolA	DNA-directed DNA polymerase I	Cytoplasmic	DNA metabolism	General function prediction only	off Symb1	0.0072622	0.010744	0.0068181	0.00827477	3	off	off	off	off
OG1RF_10550_550	OG1RF_10550_550	Family 8 polysaccharide lyase	Cytoplasmic Membrane	Cell envelope	Surface structures	off Symb1	0.035089	0.038804	0.032943	0.035612	3	off	off	off	off
OG1RF_10951_951	CscK	Fructokinase (EC 2.7.1.4)	Cytoplasmic	information storage and processing	Transcription	off Symb1		0.0068597	0.0065293	0.0066945	2	off	off	off	off
OG1RF_11396_1396	OG1RF_11396	GDSL family lipase/acylhydrolase	Unknown	metabolism	Amino acid transport and metabolism	off Symb1	0.032133	0.014086	0.026816	0.024345	3	off	off	off	off
OG1RF_11526_1526	GelE	Gelatinase (EC 3.4.24.28)	Extracellular	metabolism	Amino acid transport and metabolism	off Symb1	0.006292	0.010343	0.0098453	0.00882677	3	off	off	off	off
OG1RF_11455_1455	OG1RF_11455_1455	General stress protein	Unknown	poorly characterized	General function prediction only	off Symb1	0.010675	0.01053	0.015034	0.0120797	3	off	off	off	off
OG1RF_10897_897	OG1RF_10897	glutamine ABC superfamily ATP binding cassette transporter, binding protein	Unknown	metabolism	Amino acid transport and metabolism	off Symb1	0.015528		0.014578	0.015053	2	off	off	off	off
OG1RF_12425_2425	TrePP	glycosyl hydrolase	Cytoplasmic Membrane	metabolism	Pentose phosphate pathway	off Symb1	0.0093439	0.012672	0.010966	0.010994	3	off	off	off	off
OG1RF_11531_1531	OG1RF_11531_1531	Glycosyl hydrolase	Unknown	metabolism	Carbohydrate transport and metabolism	off Symb1	0.028468	0.02864	0.030469	0.0291923	3	off	off	off	off
OG1RF_11839_1839	GlyS	glycyl-tRNA synthetase beta subunit	Cytoplasmic	Protein synthesis	Function unknown	off Symb1	0.0030765	0.0030345	0.0028883	0.00299977	3	off	off	off	off
OG1RF_10672_672	OG1RF_10672	GNAT family acetyltransferase	Cytoplasmic	poorly characterized	General function prediction only	off Symb1	0.028544	0.016892	0.016079	0.020505	3	off	off	off	off
OG1RF_12541_2541	YchF	GTP-binding protein YchF	Cytoplasmic	poorly characterized	Pentose phosphate pathway	off Symb1		0.0056763	0.005403	0.00553965	2	off	off	off	off
OG1RF_10922_922	OG1RF_10922	hypothetical protein	Cytoplasmic	poorly characterized	Function unknown	off Symb1	0.029449	0.021785	0.034561	0.0285983	3	off	off	off	off
OG1RF_11802_1802	OG1RF_11802	hypothetical protein	Cytoplasmic	poorly characterized	Function unknown	off Symb1	0.042947		0.01728	0.0301135	2	off	off	off	off
OG1RF_10768_768	OG1RF_10768	lipoprotein	Cytoplasmic Membrane	poorly characterized	Function unknown	off Symb1	0.054115	0.058228	0.046187	0.0528433	3	off	off	off	off
OG1RF_11682_1682	OG1RF_11682_1682	Lipoprotein	Cytoplasmic Membrane	metabolism	Inorganic ion transport and metabolism	off Symb1	0.011562	0.0076026		0.0095823	2	off	off	off	off
OG1RF_11421_1421	OG1RF_11421	LysR family transcriptional regulator	Cytoplasmic	information storage and processing	Transcription	off Symb1	0.0067996		0.0095757	0.00818765	2	off	off	off	off
OG1RF_10392_392	OG1RF_10392	M3 family peptidase	Cytoplasmic	metabolism	Translation factors	off Symb1		0.010391	0.0049453	0.0051121	2	off	off	off	off
OG1RF_12108_2108	CelM	M42 family glutamyl aminopeptidase	Cytoplasmic Membrane	metabolism	Function unknown	off Symb1	0.014827	0.0058498		0.0103384	2	off	off	off	off
OG1RF_11607_1607	OG1RF_11607_1607	Membrane-oligosaccharide glycerophosphotransferase	Cytoplasmic Membrane	Cell envelope	Biosynthesis and degradation of surface polysaccharides and lipopolysaccharides	off Symb1	0.0052416	0.00517	0.0049211	0.0051109	2	off	off	off	off
OG1RF_12106_2106	OG1RF_12106	metallo-beta-lactamase	Cytoplasmic	poorly characterized	General function prediction only	off Symb1	0.0082119	0.0080997		0.0081558	2	off	off	off	off
OG1RF_10957_957	OG1RF_10957_957	Metallo-beta-lactamase superfamily protein	Cytoplasmic	Transcription	Degradation of RNA	off Symb1	0.0075982	0.0074944	0.0053501	0.00681423	2	off	off	off	off
OG1RF_12224_2224	OG1RF_12224	metallo-beta-lactamase superfamily protein	Cytoplasmic	Transcription	Degradation of RNA	off Symb1	0.0076117		0.0035731	0.0055924	2	off	off	off	off
OG1RF_11740_1740	Map2	Methionine aminopeptidase (MAP) (MetAP) (EC 3.4.11.18) (Peptidase M)	Cytoplasmic	Protein fate	Protein modification and repair	off Symb1	0.0084059	0.012437		0.0104214	2	off	off	off	off
OG1RF_12387_2387	Fmt	methionyl-tRNA formyltransferase	Cytoplasmic	Protein synthesis	Pentose phosphate pathway	off Symb1	0.013643	0.0067282	0.0064042	0.00892513	3	off	off	off	off
OG1RF_11456_1456	OG1RF_11456_1456	Methyl-accepting chemotaxis family protein	Unknown	poorly characterized	General function prediction only	off Symb1	0.019528	0.012841	0.018334	0.016901	3	off	off	off	off
OG1RF_11530_1530	AmiD4	N-acetylmuramoyl-L-alanine amidase	Extracellular	Cell envelope	Surface structures	off Symb1	0.070731	0.058408	0.066405	0.0651813	3	off	off	off	off
OG1RF_11660_1660	Ndh2	NADH dehydrogenase	Cytoplasmic Membrane	metabolism	Cell division	off Symb1	0.013245	0.010451		0.011848	2	off	off	off	off
OG1RF_12350_2350	OG1RF_12350	oligopeptide ABC superfamily ATP binding cassette transporter, binding protein	Cellwall	metabolism	Pentose phosphate pathway	off Symb1	0.01171	0.013475	0.0054968	0.0102273	3	off	off	off	off
OG1RF_12419_2419	YueF	peptidase M16 inactive domain protein	Cytoplasmic	poorly characterized	Pentose phosphate pathway	off Symb1	0.0075892	0.0099807	0.007125	0.00823163	3	off	off	off	off
OG1RF_12310_2310	OG1RF_12310	peptidase propeptide and YPEB domain protein	Cytoplasmic Membrane	poorly characterized	Pentose phosphate pathway	off Symb1	0.016053	0.015834	0.015072	0.015653	3	off	off	off	off
OG1RF_12366_2366	OG1RF_12366_2366	Peptide ABC superfamily ATP binding cassette transporter, binding protein	Unknown	metabolism	Amino acid transport and metabolism	off Symb1	0.048689	0.03913	0.025395	0.037738	3	off	off	off	off
OG1RF_11384_1384	OG1RF_11384_1384	Permease protein	Cytoplasmic Membrane	Cell envelope	Biosynthesis and degradation of surface polysaccharides and lipopolysaccharides	off Symb1		0.0049319	0.0046944	0.00481315	2	off	off	off	off
OG1RF_12267_2267	OG1RF_12267_2267	Permease protein	Cytoplasmic Membrane	cellular processes and signaling	Defense mechanisms	off Symb1	0.0079667	0.0052386		0.00660265	2	off	off	off	off
OG1RF_12269_2269	OG1RF_12269	PFL4705 family integrating conjugative element protein	Unknown	Cell envelope	Pentose phosphate pathway	off Symb1	0.035768	0.043421	0.030998	0.036729	3	off	off	off	off
OG1RF_11476_1476	SecA	preprotein translocase subunit SecA	Cytoplasmic	Protein fate	Function unknown	off Symb1	0.0050119	0.0037076	0.0058818	0.0048671	3	off	off	off	off
OG1RF_10186_186	OG1RF_10186	protein of hypothetical function DUF74	Unknown	poorly characterized	Carbohydrate transport and metabolism	off Symb1	0.031094	0.020446		0.01718	2	off	off	off	off
OG1RF_11313_1313	OG1RF_11313_1313	Putative lipoprotein	Cytoplasmic Membrane	poorly characterized	Function unknown	off Symb1	0.038127	0.018803	0.011932	0.022954	3	off	off	off	off
OG1RF_10442_442	OG1RF_10442_442	Putative lipoprotein	Unknown	poorly characterized	Function unknown	off Symb1	0.0059974		0.0056306	0.005814	2	off	off	off	off
OG1RF_12283_2283	OG1RF_12283_2283	Putative lipoprotein	Unknown	poorly characterized	Function unknown	off Symb1		0.0091562	0.017431	0.0132936	2	off	off	off	off
OG1RF_11888_1888	PycA	pyruvate carboxylase	Cytoplasmic	Energy metabolism	Function unknown	off Symb1		0.0027421	0.00261	0.00267605	2	off	off	off	off
OG1RF_10965_965	OG1RF_10965_965	Response regulator	Cytoplasmic	cellular processes and signaling	Signal transduction mechanisms	off Symb1	0.031935		0.012849	0.022392	2	off	off	off	off
OG1RF_10483_483	OG1RF_10483	rhodanese family protein	Cytoplasmic	poorly characterized	Translation factors	off Symb1	0.010135	0.013329	0.012687	0.0120503	2	off	off	off	off
OG1RF_11268_1268	EngA	ribosome-associated GTPase EngA	Cytoplasmic Membrane	Protein synthesis	Function unknown	off Symb1	0.004897		0.0068962	0.0058966	2	off	off	off	off
OG1RF_10598_598	QueA	S-adenosylmethionine:tRNA ribosyltransferase-isomerase	Cytoplasmic	Protein synthesis	tRNA and rRNA base modification	off Symb1	0.0062247	0.0061397	0.0058441	0.0060695	3	off	off	off	off
OG1RF_11168_1168	OG1RF_11168	SAM-dependent methyltransferase	Cytoplasmic	poorly characterized	General function prediction only	off Symb1	0.0082755	0.0081625		0.008219	2	off	off	off	off
OG1RF_11759_1759	OG1RF_11759_1759	Sensor histidine kinase	Cytoplasmic Membrane	cellular processes and signaling	Signal transduction mechanisms	off Symb1		0.0036561	0.0034801	0.0035681	2	off	off	off	off
OG1RF_10889_889	LepB	signal peptidase I LepB	Cellwall	Protein fate	Function unknown	off Symb1	0.017597	0.017356	0.022028	0.0189937	3	off	off	off	off
OG1RF_10929_929	OG1RF_10929_929	Site-specific DNA-methyltransferase	Cytoplasmic	DNA metabolism	DNA replication, recombination, and repair	off Symb1		0.0081625	0.010359	0.00926075	2	off	off	off	off
OG1RF_11094_1094	OG1RF_11094_1094	SPFH domain/band 7 family protein	Cytoplasmic Membrane	poorly characterized	Function unknown	off Symb1		0.0086132	0.0061488	0.007381	2	off	off	off	off
AAM75226.1_20	EF0020	Ssb protein		DNA metabolism	DNA replication, recombination, and repair	off Symb1	0.028093		0.013188	0.0206405	2	off	off	off	off
OG1RF_11774_1774	OG1RF_11774_1774	Sugar ABC superfamily ATP binding cassette transporter, sugar-binding protein	Cytoplasmic Membrane	metabolism	Carbohydrate transport and metabolism	off Symb1	0.035166	0.01982	0.014149	0.023045	3	off	off	off	off
OG1RF_10434_434	LacD	Tagatose 1,6-diphosphate aldolase (EC 4.1.2.40) (D-tagatose-1,6-bisphosphate aldolase) (Tagatose-bisphosphate aldolase)	Unknown	Energy metabolism	Biosynthesis and degradation of polysaccharides	off Symb1	0.0098542		0.0061677	0.00801095	2	off	off	off	off
OG1RF_11743_1743	OG1RF_11743_1743	TetR family transcriptional regulator	Cytoplasmic	information storage and processing	Transcription	off Symb1	0.011237		0.01055	0.0108935	2	off	off	off	off
OG1RF_12159_2159	ThrS	Threonine--tRNA ligase (EC 6.1.1.3) (Threonyl-tRNA synthetase)	Cytoplasmic	Protein synthesis	tRNA aminoacylation	off Symb1	0.0048525	0.0063816		0.00561705	2	off	off	off	off
OG1RF_10984_984	OG1RF_10984	transcriptional regulator	Cytoplasmic Membrane	Regulatory functions	Other	off Symb1	0.014093	0.0139	0.0099233	0.0126388	3	off	off	off	off
OG1RF_12071_2071	OG1RF_12071	transcriptional regulator	Cytoplasmic Membrane	Regulatory functions	Other	off Symb1	0.0057088		0.0053597	0.00553425	2	off	off	off	off
OG1RF_10315_315	OG1RF_10315	TRAP-T family tripartite ATP-independent periplasmic transporter, binding protein	Unknown	Transport and binding proteins	Translation factors	off Symb1	0.022307	0.012573	0.026926	0.020602	3	off	off	off	off
OG1RF_10727_727	MurG	UDP-N-acetylglucosamine--N-acetylmuramyl-(pentapeptide) pyrophosphoryl-undecaprenol N-acetylglucosamine transferase	Cytoplasmic Membrane	Cell envelope	Cell division	off Symb1	0.0058019	0.0057226	0.005447	0.00565717	3	off	off	off	off
OG1RF_11573_1573	MurC	UDP-N-acetylmuramate--L-alanine ligase (EC 6.3.2.8) (UDP-N-acetylmuramoyl-L-alanine synthetase)	Cytoplasmic	Cell envelope	Biosynthesis and degradation of murein sacculus and peptidoglycan	off Symb1	0.0046822	0.0069274	0.0043959	0.00533517	3	off	off	off	off
OG1RF_10987_987	OG1RF_10987_987	Uncharacterized protein	Cytoplasmic Membrane	poorly characterized	Function unknown	off Symb1	0.0059308	0.0058498		0.0058903	2	off	off	off	off
OG1RF_11751_1751	OG1RF_11751_1751	Uncharacterized protein	Unknown	poorly characterized	Conserved	off Symb1	0.027373	0.035999	0.017133	0.026835	3	off	off	off	off
OG1RF_12502_2502	OG1RF_12502_2502	Uncharacterized protein	Unknown	poorly characterized	Function unknown	off Symb1	0.003415	0.002021	0.0038474	0.00309447	3	off	off	off	off
OG1RF_10708_708	PepQ	xaa-Pro dipeptidase	Cytoplasmic	metabolism	General function prediction only	off Symb1	0.027141	0.023796	0.014156	0.0216977	3	off	off	off	off
OG1RF_10643_643	RplT	50S ribosomal protein L20	Cytoplasmic	Protein synthesis	Ribosomal proteins: synthesis and modification	off D27	off	off	off	off		0.070468	0.076196	0.050698	0.0657873	3
OG1RF_10986_986	BudA	Alpha-acetolactate decarboxylase (EC 4.1.1.5)	Cytoplasmic	Energy metabolism	Fermentation	off D27	off	off	off	off		0.011945		0.014733	0.013339	2
OG1RF_10481_481	OG1RF_10481_481	Beta-lactamase (EC 3.5.2.6)	Cytoplasmic Membrane	cellular processes and signaling	Defense mechanisms	off D27	off	off	off	off		0.0048028	0.0058423		0.00532255	2
OG1RF_10682_682	PgmB	Beta-phosphoglucomutase (EC 5.4.2.6)	Cytoplasmic	Energy metabolism	Glycolysis/gluconeogenesis	off D27	off	off	off	off		0.020985	0.025527	0.019411	0.0219743	3
OG1RF_10066_66	OG1RF_10066_66	Crp/Fnr family transcriptional regulator	Cytoplasmic	cellular processes and signaling	Signal transduction mechanisms	off D27	off	off	off	off		0.012881		0.0079435	0.0104122	2
OG1RF_11733_1733	RfbC	dTDP-4-dehydrorhamnose 3,5-epimerase (EC 5.1.3.13)	Cytoplasmic	Cell envelope	Biosynthesis and degradation of surface polysaccharides and lipopolysaccharides	off D27	off	off	off	off		0.014712	0.017896	0.022681	0.0184297	3
OG1RF_10683_683	Map	Family 65 glycosyl hydrolase (EC 2.4.1.8)	Cytoplasmic	metabolism	Carbohydrate transport and metabolism	off D27	off	off	off	off		0.0059498	0.0043426		0.0051462	2
OG1RF_11592_1592	GlpK	Glycerol kinase	Cytoplasmic	Energy metabolism	Other	off D27	off	off	off	off		0.022317	0.0090492	0.012042	0.0144694	3
OG1RF_11591_1591	GlpO	Glycerol-3-phosphate oxidase (EC 1.1.3.21)	Cytoplasmic	metabolism	Energy production and conversion	off D27	off	off	off	off		0.01683	0.0037222	0.0070761	0.00920943	3
OG1RF_11658_1658	OG1RF_11658_1658	GntR family transcriptional regulator	Cytoplasmic	information storage and processing	Transcription	off D27	off	off	off	off		0.0079978	0.0097289	0.007398	0.0083749	3
OG1RF_10960_960	OG1RF_10960_960	HAD-superfamily subfamily IIA hydrolase	Unknown	poorly characterized	Enzymes of unknown specificity	off D27	off	off	off	off		0.010919	0.013282		0.0121005	2
OG1RF_11782_1782	IolE	Inosose dehydratase (EC 4.2.1.44) (2-keto-myo-inositol dehydratase)	Cytoplasmic	Energy metabolism	Sugars	off D27	off	off	off	off			0.015316	0.0058234	0.0105697	2
AAM75243.1_36	EF0037	Ketopantoate reductase, putative		Biosynthesis of cofactors, prosthetic groups, and carriers	Pantothenate and coenzyme A	off D27	off	off	off	off		0.044795	0.032695	0.027624	0.035038	3
OG1RF_10456_456	LacR	Lactose PTS family porter repressor	Unknown	information storage and processing	Transcription	off D27	off	off	off	off		0.0073948		0.0068402	0.0071175	2
OG1RF_10978_978	Mdh	Malate dehydrogenase (Oxaloacetate-decarboxylating) (NADP(+)) (EC 1.1.1.40)	Unknown	metabolism	Energy production and conversion	off D27	off	off	off	off		0.0095809		0.0088624	0.00922165	2
OG1RF_11253_1253	Tig2	Peptidyl-prolyl cis-trans isomerase (EC 5.2.1.8)	Unknown	Protein fate	Protein folding and stabilization	off D27	off	off	off	off		0.007032	0.012831		0.0099315	2
OG1RF_10148_148	ThiD	Phosphomethylpyrimidine kinase (EC 2.7.4.7)	Cytoplasmic	Biosynthesis of cofactors, prosthetic groups, and carriers	Thiamine	off D27	off	off	off	off		0.006801	0.020683	0.022019	0.016501	3
OG1RF_10090_90	OG1RF_10090_90	Putative lipoprotein	Unknown	information storage and processing	Transcription	off D27	off	off	off	off		0.01428		0.013209	0.0137445	2
OG1RF_10143_143	RpiA	Ribose-5-phosphate isomerase A (EC 5.3.1.6) (Phosphoriboisomerase A)	Cytoplasmic	Energy metabolism	Pentose phosphate pathway	off D27	off	off	off	off		0.0082455		0.0076272	0.00793635	2
OG1RF_12304_2304	RlmH	Ribosomal RNA large subunit methyltransferase H (EC 2.1.1.177) (23S rRNA (pseudouridine1915-N3)-methyltransferase) (23S rRNA m3Psi1915 methyltransferase) (rRNA (pseudouridine-N3-)-methyltransferase RlmH)	Cytoplasmic	Protein synthesis	tRNA and rRNA base modification	off D27	off	off	off	off		0.01172	0.028514		0.020117	2
OG1RF_12545_2545	GidB	Ribosomal RNA small subunit methyltransferase G (EC 2.1.1.-) (16S rRNA 7-methylguanosine methyltransferase)	Cytoplasmic	Protein synthesis	tRNA and rRNA base modification	off D27	off	off	off	off		0.0064037	0.01558	0.0059235	0.0093024	3
OG1RF_11044_1044	RbfA	Ribosome-binding factor A	Cytoplasmic	Transcription	RNA processing	off D27	off	off	off	off			0.019542	0.01486	0.017201	2
OG1RF_11835_1835	OG1RF_11835_1835	TrmH family RNA methyltransferase	Unknown	information storage and processing	Translation, ribosomal structure and biogenesis	off D27	off	off	off	off		0.0072228		0.0066812	0.006952	2
OG1RF_12441_2441	OG1RF_12441_2441	Uncharacterized protein	Cytoplasmic Membrane	Cellular processes	Cell division	off D27	off	off	off	off		0.056756	0.06904	0.048125	0.0579737	3
OG1RF_11629_1629	YwlG	UPF0340 protein OG1RF_11629	Cytoplasmic	poorly characterized	Conserved	off D27	off	off	off	off		0.024649	0.017991	0.022801	0.0218137	3
OG1RF_10487_487	OG1RF_10487_487	WxL domain surface protein	Unknown	poorly characterized	General function prediction only	off D27	off	off	off	off		0.02878	0.013128	0.026621	0.022843	3
OG1RF_10064_64	OG1RF_10064_64	Glycoside hydrolase family protein	Cytoplasmic Membrane	metabolism	Carbohydrate transport and metabolism	5.62994	0.17678	0.16896	0.1724	0.172713	3	0.037078	0.026189	0.028766	0.0306777	3
OG1RF_11203_1203	GdhA	Glutamate dehydrogenase	Cytoplasmic	metabolism	Amino acid transport and metabolism	4.6198	0.023829	0.025854	0.022372	0.0240183	3	0.0041596	0.0075898	0.0038476	0.005199	3
OG1RF_12044_2044	PepF	Oligoendopeptidase F (EC 3.4.24.-)	Cytoplasmic	Protein fate	Degradation of proteins, peptides, and glycopeptides	4.4828	0.026556	0.024447	0.013297	0.0214333	3	0.0077259	0.0037592	0.0028586	0.00478123	3
OG1RF_10021_21	OG1RF_10021_21	PTS family mannose/fructose/sorbose porter component IID	Cytoplasmic Membrane	Transport and binding proteins	Carbohydrates, organic alcohols, and acids	3.94458	0.042279	0.038226	0.036385	0.0389633	3		0.011222	0.0085334	0.0098777	2
OG1RF_12464_2464	OG1RF_12464_2464	ABC superfamily ATP binding cassette transporter, binding protein	Cytoplasmic Membrane	metabolism	Inorganic ion transport and metabolism	3.87338	0.12952	0.085166	0.11423	0.109639	3	0.027404	0.04167	0.015843	0.0283057	3
OG1RF_10499_499	OG1RF_10499_499	Uncharacterized protein	Unknown	poorly characterized	Function unknown	3.54125	0.044481	0.043873	0.030371	0.039575	3	0.014117	0.01288	0.0065293	0.0111754	3
OG1RF_10107_107	OG1RF_10107_107	Family 20 glycosyl hydrolase (EC 3.2.1.52)	Cytoplasmic Membrane	metabolism	Carbohydrate transport and metabolism	3.36708	0.49919	0.61392	0.72956	0.614223	3	0.22717	0.09879	0.2213	0.18242	3
OG1RF_10593_593	OpuCC	Glycine/betaine/carnitine/choline ABC superfamily ATP binding cassette transporter, binding protein (EC 3.6.3.32)	Cytoplasmic Membrane	Transport and binding proteins	Amino acids, peptides and amines	3.09659	0.17734	0.17835	0.1665	0.174063	3	0.075875	0.05907	0.033689	0.0562113	3
OG1RF_12215_2215	PabC	Aminodeoxychorismate lyase	Unknown	poorly characterized	Conserved	3.08816	0.071787	0.075375	0.071745	0.072969	3	0.028296	0.029503	0.013087	0.0236287	3
OG1RF_11761_1761	OG1RF_11761_1761	ABC superfamily ATP binding cassette transporter, binding protein	Unknown	metabolism	Carbohydrate transport and metabolism	2.94379	0.23845	0.25029	0.23824	0.242327	3	0.1031	0.069677	0.074177	0.082318	3
OG1RF_12052_2052	OG1RF_12052_2052	WxL domain surface protein	Unknown	poorly characterized	General function prediction only	2.94202	0.045515	0.016325	0.015539	0.025793	3	0.010834	0.0087861	0.0066812	0.0087671	3
OG1RF_11908_1908	OG1RF_11908_1908	Uncharacterized protein	Cytoplasmic	poorly characterized	Function unknown	2.80318	0.010415	0.020546	0.014667	0.0152093	3	0.0045451		0.0063064	0.00542575	2
OG1RF_12303_2303	OG1RF_12303_2303	Family 8 polysaccharide lyase	Cellwall	Cell envelope	Other	2.7355	0.018167	0.019626	0.025178	0.0209903	3	0.0090607		0.0062859	0.0076733	2
OG1RF_12456_2456	OG1RF_12456_2456	WxL domain surface protein	Cellwall	metabolism	Inorganic ion transport and metabolism	2.72772	0.0052783	0.0071586	0.0092916	0.00724283	3	0.0023034	0.001401	0.0042614	0.00265527	3
OG1RF_11392_1392	OG1RF_11392_1392	S41A family carboxy-terminal peptidase (EC 3.4.21.-)	Cytoplasmic Membrane	Protein fate	Degradation of proteins, peptides, and glycopeptides	2.72243	0.064497	0.076778	0.068905	0.07006	3	0.029117	0.028335	0.019751	0.0257343	3
OG1RF_11764_1764	OG1RF_11764_1764	Cell wall surface anchor family protein	Cellwall	poorly characterized	General function prediction only	2.59348	0.0022498	0.0038834	0.0047525	0.00362857	3	0.00098182		0.0018164	0.00139911	2
OG1RF_12453_2453	OG1RF_12453_2453	WxL domain surface protein	Unknown	poorly characterized	General function prediction only	2.51372	0.03612	0.035626	0.022607	0.031451	3	0.014011	0.017044	0.0064802	0.0125117	3
OG1RF_11988_1988	AtpA2	ATP synthase subunit alpha (EC 3.6.3.14) (ATP synthase F1 sector subunit alpha) (F-ATPase subunit alpha)	Cytoplasmic	Energy metabolism	ATP-proton motive force interconversion	2.49951	0.018548	0.024393	0.017414	0.0201183	3	0.012591	0.0065642	0.0049915	0.0080489	3
OG1RF_10985_985	AlsS	Acetolactate synthase (EC 2.2.1.6)	Cytoplasmic Membrane	Protein synthesis	tRNA aminoacylation	2.49083	0.01941	0.013401	0.016401	0.016404	3	0.0084704		0.0047011	0.00658575	2
AAM75246.1_39	EF0040	Choloylglycine hydrolase		Cell envelope	Biosynthesis and degradation of surface polysaccharides and lipopolysaccharides	2.46625	0.016474	0.022749	0.012374	0.017199	3	0.0086273		0.0053202	0.00697375	2
OG1RF_10621_621	OG1RF_10621_621	Amino acid ABC superfamily ATP binding cassette transporter, membrane protein	Cytoplasmic Membrane	Transport and binding proteins	Amino acids, peptides and amines	2.46531	0.037265	0.025946	0.026754	0.0299883	3	0.017219	0.013964	0.0053093	0.0121641	3
OG1RF_12334_2334	Pnp	Polyribonucleotide nucleotidyltransferase (EC 2.7.7.8) (Polynucleotide phosphorylase)	Cytoplasmic	Transcription	Degradation of RNA	2.41557	0.047008	0.043375	0.039862	0.043415	3	0.014558	0.0161	0.023261	0.017973	3
OG1RF_12001_2001	OG1RF_12001_2001	Nicotinate phosphoribosyltransferase (EC 6.3.4.21)	Cytoplasmic	Biosynthesis of cofactors, prosthetic groups, and carriers	Pyridine nucleotides	2.41238	0.010805	0.01492	0.014202	0.013309	3	0.0075445		0.0034894	0.00551695	2
OG1RF_11701_1701	GlnA	Glutamine synthetase (EC 6.3.1.2)	Cytoplasmic	Amino acid biosynthesis	Glutamate family	2.40602	0.047341	0.042025	0.035557	0.041641	3	0.016528	0.020105	0.015288	0.017307	3
OG1RF_10993_993	OG1RF_10993_993	Spermidine/putrescine ABC superfamily ATP binding cassette transporter	Unknown	metabolism	Amino acid transport and metabolism	2.39995	0.030157	0.038668	0.033975	0.0342667	3	0.021056	0.0096052	0.012173	0.0142781	3
OG1RF_12452_2452	UbiD	UbiD family decarboxylase (EC 4.1.1.-)	Extracellular	poorly characterized	General function prediction only	2.39835	0.19487	0.18803	0.24261	0.208503	3	0.10353	0.085456	0.071823	0.0869363	3
OG1RF_10115_115	GuaA	GMP synthase [glutamine-hydrolyzing] (EC 6.3.5.2) (GMP synthetase) (Glutamine amidotransferase)	Cytoplasmic	Purines, pyrimidines, nucleosides, and nucleotides	Purine ribonucleotide biosynthesis	2.39348	0.065695	0.058723	0.042403	0.055607	3	0.026877	0.019617	0.023204	0.0232327	3
OG1RF_12225_2225	CspA3	Cold shock protein CspA	Cytoplasmic	information storage and processing	Transcription	2.37794	0.0647	0.15954	0.12149	0.115243	3	0.028235	0.068692		0.0484635	2
OG1RF_12420_2420	MscL	Large-conductance mechanosensitive channel	Cytoplasmic Membrane	Cellular processes	Adaptations to atypical conditions	2.33543	0.042988	0.056535	0.053812	0.0511117	3	0.031267	0.02282	0.011569	0.0218853	3
OG1RF_10356_356	NrdE	Ribonucleoside-diphosphate reductase (EC 1.17.4.1)	Unknown	metabolism	Nucleotide transport and metabolism	2.32172	0.035634	0.032219	0.022303	0.030052	3	0.018142	0.0063055	0.014384	0.0129438	3
OG1RF_10140_140	Adh3	Putative alcohol dehydrogenase (NADP(+)) (EC 1.1.1.2)	Cytoplasmic	metabolism	Energy production and conversion	2.3099	0.018682	0.015794	0.020045	0.0181737	3	0.0093174	0.0056671	0.0086187	0.00786773	3
OG1RF_11795_1795	PurB	Adenylosuccinate lyase (ASL) (EC 4.3.2.2) (Adenylosuccinase)	Cytoplasmic	Purines, pyrimidines, nucleosides, and nucleotides	Purine ribonucleotide biosynthesis	2.29133	0.0099076	0.012215	0.013953	0.0120252	3	0.0064855	0.0052595	0.0039994	0.00524813	3
OG1RF_10354_354	OG1RF_10354_354	Uncharacterized protein	Unknown	poorly characterized	General function prediction only	2.25508	0.024943	0.0098407	0.016392	0.0170586	3	0.0087079	0.0079445	0.0060411	0.0075645	3
OG1RF_12327_2327	SrtA	Sortase SrtA	Cytoplasmic Membrane	Cell envelope	Other	2.2384	0.16626	0.16399	0.082152	0.137467	3	0.064917	0.055742	0.063581	0.0614133	3
OG1RF_10919_919	OG1RF_10919_919	Cof family protein	Cytoplasmic	poorly characterized	Enzymes of unknown specificity	2.23597	0.031631	0.023399	0.025984	0.0270047	3	0.017255	0.012593	0.0063842	0.0120774	3
OG1RF_10736_736	IleS	Isoleucine--tRNA ligase (EC 6.1.1.5) (Isoleucyl-tRNA synthetase)	Cytoplasmic	Protein synthesis	tRNA aminoacylation	2.21943	0.027461	0.033857	0.02041	0.0272427	3	0.011984	0.0072888	0.017551	0.0122746	3
OG1RF_10869_869	OG1RF_10869_869	von Willebrand factor type A domain protein	Unknown	Cell envelope	Biosynthesis and degradation of surface polysaccharides and lipopolysaccharides	2.21178	0.033875	0.033412	0.038164	0.0351503	3	0.019429	0.010276	0.017972	0.0158923	3
OG1RF_10463_463	GatB	Aspartyl/glutamyl-tRNA(Asn/Gln) amidotransferase subunit B (Asp/Glu-ADT subunit B) (EC 6.3.5.-)	Cytoplasmic	Protein synthesis	tRNA aminoacylation	2.19147	0.042612	0.046454	0.035795	0.0416203	3	0.021532	0.011906	0.023538	0.018992	3
OG1RF_12203_2203	OG1RF_12203_2203	ABC superfamily ATP binding cassette transporter, substrate-binding protein	Unknown	metabolism	Carbohydrate transport and metabolism	2.1883	0.1253	0.12359	0.11058	0.119823	3	0.076552	0.04523	0.042487	0.0547563	3
OG1RF_10355_355	NrdF	Ribonucleoside-diphosphate reductase subunit beta (EC 1.17.4.1)	Unknown	Purines, pyrimidines, nucleosides, and nucleotides	2'-Deoxyribonucleotide metabolism	2.05115	0.043234	0.032802	0.028101	0.0347123	3	0.023221	0.014124	0.013425	0.0169233	3
OG1RF_11449_1449	TyrS	Tyrosine--tRNA ligase (EC 6.1.1.1) (Tyrosyl-tRNA synthetase)	Cytoplasmic	Protein synthesis	tRNA aminoacylation	2.04969	0.038127	0.030085	0.02625	0.0314873	3	0.015529	0.016192	0.014365	0.015362	3
OG1RF_10894_894	PheT	Phenylalanine--tRNA ligase beta subunit (EC 6.1.1.20) (Phenylalanyl-tRNA synthetase beta subunit)	Cytoplasmic	Protein synthesis	tRNA aminoacylation	2.04584	0.014551	0.023486	0.018629	0.0188887	3	0.010391	0.0098313	0.0074759	0.00923273	3
OG1RF_12431_2431	Prs1	Ribose-phosphate pyrophosphokinase (RPPK) (EC 2.7.6.1) (5-phospho-D-ribosyl alpha-1-diphosphate) (Phosphoribosyl diphosphate synthase) (Phosphoribosyl pyrophosphate synthase)	Cytoplasmic	Purines, pyrimidines, nucleosides, and nucleotides	Purine ribonucleotide biosynthesis	2.01787	0.039661	0.02282	0.024824	0.0291017	3	0.011539	0.021054	0.010673	0.014422	3
OG1RF_10459_459	LigA	DNA ligase (EC 6.5.1.2) (Polydeoxyribonucleotide synthase [NAD(+)])	Cytoplasmic	DNA metabolism	DNA replication, recombination, and repair	2.00555	0.007896	0.0077882	0.0044479	0.0067107	3	0.004135	0.0033533	0.0025499	0.00334607	3
OG1RF_11907_1907	OG1RF_11907_1907	Penicillin-binding protein 4	Cytoplasmic Membrane	Cell envelope	Biosynthesis and degradation of surface polysaccharides and lipopolysaccharides	1.99646	0.0047098	0.0092908	0.0073695	0.00712337	3		0.0033336	0.0038024	0.003568	2
OG1RF_10055_55	GlmU	Bifunctional protein GlmU	Cytoplasmic	Cell envelope	Biosynthesis and degradation of murein sacculus and peptidoglycan	1.98054	0.023157	0.015989	0.017393	0.0188463	3	0.0080845	0.0073758	0.013087	0.00951577	3
OG1RF_10726_726	MurD	UDP-N-acetylmuramoylalanine--D-glutamate ligase (EC 6.3.2.9) (D-glutamic acid-adding enzyme) (UDP-N-acetylmuramoyl-L-alanyl-D-glutamate synthetase)	Cytoplasmic	Cell envelope	Biosynthesis and degradation of murein sacculus and peptidoglycan	1.95715	0.016388	0.011546	0.013188	0.0137073	3	0.01226	0.0049711	0.0037801	0.00700373	3
OG1RF_11445_1445	Nfo	Probable endonuclease 4 (EC 3.1.21.2) (Endodeoxyribonuclease IV) (Endonuclease IV)	Cytoplasmic	DNA metabolism	DNA replication, recombination, and repair	1.93449	0.017972	0.017727	0.016873	0.017524	3	0.0094116		0.0087058	0.0090587	2
OG1RF_12493_2493	RpoB	DNA-directed RNA polymerase subunit beta (RNAP subunit beta) (EC 2.7.7.6) (RNA polymerase subunit beta) (Transcriptase subunit beta)	Cytoplasmic	Transcription	DNA-dependent RNA polymerase	1.93321	0.032725	0.03664	0.033215	0.0341933	3	0.011579	0.012207	0.029276	0.0176873	3
OG1RF_12454_2454	UbiD2	UbiD family decarboxylase (EC 4.1.1.-)	Unknown	poorly characterized	General function prediction only	1.9067	0.091879	0.099254	0.073937	0.0883567	3	0.042005	0.051096	0.045919	0.04634	3
OG1RF_10436_436	OG1RF_10436_436	GNAT family acetyltransferase	Cytoplasmic	poorly characterized	General function prediction only	1.86216	0.052257	0.02209	0.014018	0.029455	3	0.019547	0.015852	0.012054	0.0158177	3
OG1RF_11725_1725	OG1RF_11725_1725	Group 2 glycosyl transferase	Cytoplasmic Membrane	Cell envelope	Biosynthesis and degradation of surface polysaccharides and lipopolysaccharides	1.83617	0.0040785	0.0090512	0.0057436	0.0062911	3	0.0035597		0.0032927	0.0034262	2
OG1RF_11219_1219	OG1RF_11219_1219	Beta-lactamase (EC 3.5.2.6)	Unknown	cellular processes and signaling	Defense mechanisms	1.83412	0.16606	0.17048	0.21318	0.18324	3	0.12423	0.10435	0.071138	0.099906	3
OG1RF_12537_2537	SerS	Serine--tRNA ligase (EC 6.1.1.11) (Seryl-tRNA synthetase) (Seryl-tRNA(Ser/Sec) synthetase)	Cytoplasmic	Protein synthesis	tRNA aminoacylation	1.79573	0.017666	0.019914	0.023694	0.0204247	3	0.013216	0.010718	0.010188	0.011374	3
OG1RF_10038_38	Dut	DUTP diphosphatase (EC 3.6.1.23)	Cytoplasmic	metabolism	Nucleotide transport and metabolism	1.78803	0.039784	0.032701	0.01245	0.0283117	3	0.017362	0.01408	0.01606	0.015834	3
OG1RF_11935_1935	PrfA	Peptide chain release factor 1 (RF-1)	Cytoplasmic	Protein synthesis	Translation factors	1.78309	0.032894	0.020646	0.016845	0.0234617	3	0.01305	0.0095245	0.016899	0.0131578	3
OG1RF_10350_350	OG1RF_10350_350	Transcriptional regulator	Cytoplasmic Membrane	Regulatory functions	Other	1.78239	0.17527	0.18335	0.16206	0.17356	3	0.1298	0.095861	0.066463	0.0973747	3
OG1RF_12167_2167	EndOF3	Mannosyl-glycoprotein endo-beta-N-acetylglucosaminidase (EC 3.2.1.96)	Cytoplasmic Membrane	metabolism	Carbohydrate transport and metabolism	1.77741	0.64257	1.0798	0.81393	0.845433	3	0.57863	0.18409	0.66424	0.475653	3
OG1RF_11986_1986	AtpD2	ATP synthase subunit beta (EC 3.6.3.14) (ATP synthase F1 sector subunit beta) (F-ATPase subunit beta)	Cytoplasmic Membrane	Energy metabolism	ATP-proton motive force interconversion	1.77522	0.025092	0.022499	0.014991	0.0208607	3	0.013936	0.012109	0.009208	0.011751	3
OG1RF_10042_42	GltX	Glutamate--tRNA ligase (EC 6.1.1.17) (Glutamyl-tRNA synthetase)	Cytoplasmic	Protein synthesis	tRNA aminoacylation	1.77328	0.01522	0.017156	0.01633	0.0162353	3	0.011386	0.0069251		0.00915555	2
OG1RF_10245_245	PepC	Aminopeptidase C (EC 3.4.22.40)	Cytoplasmic	metabolism	Amino acid transport and metabolism	1.77186	0.014492	0.014294	0.013605	0.0141303	3	0.0084321	0.0076928	0.0077997	0.00797487	3
OG1RF_11582_1582	OG1RF_11582_1582	6-phosphogluconolactonase (EC 3.1.1.31)	Cytoplasmic	metabolism	Carbohydrate transport and metabolism	1.76563	0.024194	0.014914	0.014196	0.017768	3	0.0079185		0.012208	0.0100632	2
OG1RF_12091_2091	OG1RF_12091_2091	Alpha/beta hydrolase	Cytoplasmic Membrane	poorly characterized	General function prediction only	1.75771	0.018094	0.028555	0.02718	0.0246097	3	0.012634	0.015368		0.014001	2
OG1RF_11354_1354	OG1RF_11354_1354	Iron (Fe) ABC superfamily ATP binding cassette transporter, binding protein	Unknown	metabolism	Inorganic ion transport and metabolism	1.75024	0.015607	0.0092365	0.014653	0.0131655	3	0.010898	0.0066281	0.0050402	0.0075221	3
OG1RF_10498_498	UvrA	UvrABC system protein A (UvrA protein) (Excinuclease ABC subunit A)	Cytoplasmic	DNA metabolism	DNA replication, recombination, and repair	1.73101	0.0079583	0.015699	0.010674	0.0114438	3	0.0049614		0.0082607	0.00661105	2
OG1RF_11932_1932	GlyA	Serine hydroxymethyltransferase (SHMT) (Serine methylase) (EC 2.1.2.1)	Cytoplasmic	metabolism	Amino acid transport and metabolism	1.72707	0.04664	0.028113	0.026759	0.0338373	3	0.024877	0.019257	0.014643	0.0195923	3
OG1RF_11167_1167	AlaS	Alanine--tRNA ligase (EC 6.1.1.7) (Alanyl-tRNA synthetase)	Cytoplasmic	Protein synthesis	tRNA aminoacylation	1.71534	0.021836	0.033503	0.038723	0.031354	3	0.023294	0.0090158	0.022526	0.0182786	3
OG1RF_10121_121	Pdp	Pyrimidine-nucleoside phosphorylase (EC 2.4.2.2)	Cytoplasmic	Purines, pyrimidines, nucleosides, and nucleotides	Other	1.70925	0.0091048	0.013471	0.012822	0.0117993	3	0.0079466	0.00725	0.005513	0.0069032	3
OG1RF_11267_1267	RpsA	30S ribosomal protein S1	Cytoplasmic	Protein synthesis	Ribosomal proteins: synthesis and modification	1.69438	0.034437	0.028741	0.019896	0.0276913	3	0.01156	0.022499	0.01497	0.016343	3
OG1RF_12158_2158	PenA	Penicillin-binding protein 2B	Cytoplasmic Membrane	Cell envelope	Biosynthesis and degradation of surface polysaccharides and lipopolysaccharides	1.68767	0.13646	0.12198	0.15214	0.13686	3	0.090569	0.076969	0.075744	0.081094	3
OG1RF_12325_2325	OG1RF_12325_2325	Putative lipoprotein	Unknown	poorly characterized	Function unknown	1.67948	0.044276	0.033966	0.036949	0.038397	3	0.030056	0.015669		0.0228625	2
OG1RF_12311_2311	TraC2	Peptide ABC superfamily ATP binding cassette transporter, binding protein	Cellwall	metabolism	Amino acid transport and metabolism	1.67532	0.083311	0.074529	0.056388	0.0714093	3	0.045657	0.049368	0.032848	0.0426243	3
OG1RF_11696_1696	GlmM	Phosphoglucosamine mutase (EC 5.4.2.10)	Cytoplasmic	Cell envelope	Biosynthesis and degradation of murein sacculus and peptidoglycan	1.67074	0.023671	0.0093389	0.011111	0.014707	3	0.0061979	0.012566	0.0076441	0.00880267	3
OG1RF_12000_2000	NadE2	NH(3)-dependent NAD(+) synthetase (EC 6.3.1.5)	Cytoplasmic	Biosynthesis of cofactors, prosthetic groups, and carriers	Pyridine nucleotides	1.66607	0.023292	0.022974	0.018223	0.0214963	3	0.016941	0.012364	0.0094022	0.0129024	3
OG1RF_10782_782	Gnd	6-phosphogluconate dehydrogenase, decarboxylating (EC 1.1.1.44)	Cytoplasmic	Energy metabolism	Pentose phosphate pathway	1.66357	0.058681	0.060105	0.052973	0.057253	3	0.039397	0.03834	0.02551	0.0344157	3
OG1RF_10141_141	GpmA	2,3-bisphosphoglycerate-dependent phosphoglycerate mutase (BPG-dependent PGAM) (PGAM) (Phosphoglyceromutase) (dPGM) (EC 5.4.2.11)	Cytoplasmic	metabolism	Carbohydrate transport and metabolism	1.65984	0.24347	0.10622	0.14946	0.166383	3	0.12668	0.079538	0.094503	0.10024	3
OG1RF_10496_496	GlnP	Amino acid ABC superfamily ATP binding cassette transporter, binding/permease protein	Cytoplasmic Membrane	Transport and binding proteins	Amino acids, peptides and amines	1.64844	0.12864	0.11667	0.11383	0.119713	3	0.091626	0.078491	0.047749	0.072622	3
OG1RF_10212_212	LysS	Lysine--tRNA ligase (EC 6.1.1.6) (Lysyl-tRNA synthetase)	Cytoplasmic	Protein synthesis	tRNA aminoacylation	1.64679	0.027868	0.014801	0.0161	0.0195897	3	0.016839	0.013656	0.005192	0.0118957	3
OG1RF_12232_2232	Tpx	Thiol peroxidase (EC 1.11.1.-)	Cytoplasmic	cellular processes and signaling	Posttranslational modification, protein turnover, chaperones	1.64187	0.031584	0.024922	0.017792	0.024766	3	0.01654	0.013413	0.015299	0.015084	3
OG1RF_10133_133	DeoB	Phosphopentomutase (EC 5.4.2.7) (Phosphodeoxyribomutase)	Cytoplasmic	Purines, pyrimidines, nucleosides, and nucleotides	Other	1.6199	0.01926	0.03528	0.012916	0.0224853	3	0.014408	0.011685	0.015549	0.0138807	3
OG1RF_11818_1818	ProS	Proline--tRNA ligase (EC 6.1.1.15) (Prolyl-tRNA synthetase)	Cytoplasmic	Protein synthesis	tRNA aminoacylation	1.60492	0.029861	0.031294	0.019274	0.0268097	3	0.021176	0.01387	0.015068	0.0167047	3
OG1RF_10870_870	OG1RF_10870_870	Cell wall surface anchor family protein	Cellwall	Cell envelope	Biosynthesis and degradation of surface polysaccharides and lipopolysaccharides	1.60303	0.033641	0.033181	0.025267	0.0306963	3	0.021532	0.02143	0.014485	0.019149	3
OG1RF_10125_125	OG1RF_10125_125	ABC superfamily ATP binding cassette transporter, binding protein	Unknown	poorly characterized	General function prediction only	1.59563	0.1765	0.18532	0.23252	0.198113	3	0.13666	0.1209	0.11492	0.12416	3
OG1RF_11968_1968	Pmi	Mannose-6-phosphate isomerase (EC 5.3.1.8)	Cytoplasmic	Energy metabolism	Sugars	1.58847	0.023136	0.01956	0.0093089	0.017335	3	0.011539	0.010527	0.010673	0.010913	3
OG1RF_11902_1902	ArgS	Arginine--tRNA ligase (EC 6.1.1.19) (Arginyl-tRNA synthetase)	Cytoplasmic	Protein synthesis	tRNA aminoacylation	1.58794	0.017066	0.018703	0.016022	0.0172637	3	0.014895	0.010066	0.0076543	0.0108718	3
OG1RF_11305_1305	Ndh	NADH dehydrogenase (EC 1.6.99.3)	Cytoplasmic	poorly characterized	General function prediction only	1.57519	0.10605	0.12319	0.095137	0.108126	3	0.067875	0.060048	0.078006	0.068643	3
OG1RF_10676_676	Pta	Phosphate acetyltransferase (EC 2.3.1.8)	Cytoplasmic	Energy metabolism	Other	1.57068	0.10018	0.095724	0.11169	0.102531	3	0.092901	0.049857	0.053077	0.0652783	3
OG1RF_12309_2309	PepA2	Glutamyl aminopeptidase (EC 3.4.11.7)	Cytoplasmic	Protein fate	Degradation of proteins, peptides, and glycopeptides	1.56919	0.02982	0.02353	0.013998	0.0224493	3	0.018218	0.012664	0.012037	0.0143063	3
OG1RF_12343_2343	OG1RF_12343_2343	Uncharacterized protein	Cellwall	poorly characterized	Function unknown	1.56029	0.022172	0.025919	0.036235	0.0281087	3	0.018635	0.012206	0.023204	0.018015	3
OG1RF_10657_657	MetG	Methionine--tRNA ligase (EC 6.1.1.10) (Methionyl-tRNA synthetase)	Cytoplasmic	Protein synthesis	tRNA aminoacylation	1.55316	0.017346	0.021775	0.022207	0.0204427	3	0.013763	0.011719	0.014004	0.013162	3
OG1RF_11453_1453	CcpA	Catabolite control protein A	Cytoplasmic	Regulatory functions	DNA interactions	1.54447	0.051293	0.053755	0.030098	0.0450487	3	0.033576	0.030633	0.023294	0.0291677	3
OG1RF_10149_149	Cfa	Cyclopropane-fatty-acyl-phospholipid synthase (EC 2.1.1.79)	Cytoplasmic	Cell envelope	Biosynthesis and degradation of surface polysaccharides and lipopolysaccharides	1.54375	0.010119	0.0049903		0.00755465	2	0.0044158	0.0053716		0.0048937	2
OG1RF_11128_1128	TrxB	Thioredoxin reductase (EC 1.8.1.9)	Cytoplasmic	Energy metabolism	Electron transport	1.54326	0.045652	0.024246	0.013188	0.0276953	3	0.027585	0.014913	0.01134	0.017946	3
OG1RF_10250_250	ChiC	Chitinase C1 (EC 3.2.1.14)	Extracellular	metabolism	Carbohydrate transport and metabolism	1.52275	0.03988	0.04236	0.046081	0.0427737	3	0.037484	0.019542	0.027243	0.0280897	3
OG1RF_12492_2492	RpoC	DNA-directed RNA polymerase subunit beta' (RNAP subunit beta') (EC 2.7.7.6) (RNA polymerase subunit beta') (Transcriptase subunit beta')	Cytoplasmic	Transcription	DNA-dependent RNA polymerase	1.51189	0.023684	0.038069	0.030471	0.0307413	3	0.022203	0.011176	0.02762	0.020333	3
OG1RF_10402_402	PepV	Dipeptidase PepV (EC 3.4.13.-)	Cytoplasmic	Protein fate	Degradation of proteins, peptides, and glycopeptides	1.50372	0.05893	0.053654	0.053198	0.0552607	3	0.043521	0.02647	0.040257	0.0367493	3
OG1RF_10448_448	PtsI	Phosphoenolpyruvate-protein phosphotransferase (EC 2.7.3.9) (Phosphotransferase system, enzyme I)	Cytoplasmic	Signal transduction	PTS	1.49198	0.12439	0.1465	0.092382	0.121091	3	0.095605	0.072933	0.074945	0.081161	3
OG1RF_10737_737	Zwf	Glucose-6-phosphate 1-dehydrogenase (G6PD) (EC 1.1.1.49)	Cytoplasmic	Energy metabolism	Pentose phosphate pathway	1.49158	0.01895	0.014538	0.017792	0.0170933	3	0.014702	0.011178	0.0084997	0.0114599	3
OG1RF_10983_983	Npr	NADH peroxidase (EC 1.11.1.1)	Cytoplasmic	poorly characterized	General function prediction only	1.49128	0.036575	0.036076	0.021462	0.031371	3	0.017957	0.026697	0.018455	0.0210363	3
OG1RF_11892_1892	TypA	GTP-binding protein TypA/BipA	Cytoplasmic Membrane	Regulatory functions	Other	1.47956	0.013978	0.018957	0.014763	0.0158993	3	0.0122	0.012985	0.0070529	0.010746	3
OG1RF_10616_616	OG1RF_10616_616	Cellulose synthase catalytic subunit (EC 2.4.1.12)	Cytoplasmic Membrane	poorly characterized	General function prediction only	1.47596	0.038792	0.029079	0.029135	0.0323353	3	0.017606	0.023064	0.025054	0.021908	3
OG1RF_10054_54	PurR	Purine operon repressor	Cytoplasmic	Purines, pyrimidines, nucleosides, and nucleotides	Purine ribonucleotide biosynthesis	1.4657	0.023462	0.026999	0.022028	0.024163	3	0.017065	0.016607	0.015785	0.0164857	3
OG1RF_10634_634	OppA	Oligopeptide ABC superfamily ATP binding cassette transporter, binding protein	Cellwall	Transport and binding proteins	Amino acids, peptides and amines	1.46448	0.18816	0.16287	0.12438	0.15847	3	0.13239	0.11008	0.082157	0.108209	3
OG1RF_11242_1242	RpoD	RNA polymerase sigma factor SigA	Cytoplasmic	Transcription	Transcription factors	1.46306	0.014505	0.0085839		0.0115445	2	0.0050638	0.0092398	0.0093682	0.0078906	3
OG1RF_11856_1856	PgcA	Bifunctional phosphoglucomutase/phosphomannomutase (EC 5.4.2.2)	Cytoplasmic	metabolism	Carbohydrate transport and metabolism	1.46195	0.043426	0.042832	0.042468	0.0429087	3	0.036322	0.026895	0.024834	0.0293503	3
OG1RF_12006_2006	GroL	60 kDa chaperonin (GroEL protein) (Protein Cpn60)	Cytoplasmic	Protein fate	Protein folding and stabilization	1.44647	0.19338	0.20631	0.17414	0.191277	3	0.11884	0.14246	0.13541	0.132237	3
OG1RF_11150_1150	OG1RF_11150_1150	Uncharacterized protein	Unknown	poorly characterized	Function unknown	1.44177	0.036953	0.048598	0.034693	0.0400813	3	0.025085	0.030515		0.0278	2
OG1RF_10517_517	MetK	S-adenosylmethionine synthase (EC 2.5.1.6)	Cytoplasmic	Central intermediary metabolism	Other	1.43952	0.029805	0.03207	0.017807	0.0265607	3	0.021283	0.014383	0.019687	0.018451	3
OG1RF_10766_766	OG1RF_10766_766	Amidase (EC 3.5.1.-)	Cytoplasmic Membrane	Cell envelope	Other	1.4298	0.06408	0.052446	0.062721	0.059749	3	0.040459	0.041978	0.042928	0.0417883	3
OG1RF_10495_495	OG1RF_10495_495	ABC superfamily ATP binding cassette transporter, ABC protein (EC 3.6.3.28)	Cytoplasmic Membrane	metabolism	Amino acid transport and metabolism	1.42528		0.0085956	0.012273	0.0104343	2	0.0076061		0.0070357	0.0073209	3
OG1RF_11143_1143	AceF	Pyruvate dehydrogenase complex E2, dihydrolipoamide acetyltransferase (EC 2.3.1.12)	Cytoplasmic	metabolism	Energy production and conversion	1.42002	0.14062	0.13675	0.14318	0.140183	3	0.11063	0.073598	0.11193	0.0987193	3
OG1RF_10151_151	RplC	50S ribosomal protein L3	Cytoplasmic	Protein synthesis	Ribosomal proteins: synthesis and modification	1.41618	0.11237	0.075571	0.1103	0.0994137	3	0.053497	0.070499	0.086599	0.0701983	3
OG1RF_10122_122	DeoC	Deoxyribose-phosphate aldolase (DERA) (EC 4.1.2.4) (2-deoxy-D-ribose 5-phosphate aldolase) (Phosphodeoxyriboaldolase)	Cytoplasmic	Purines, pyrimidines, nucleosides, and nucleotides	Other	1.40487	0.05823	0.033503	0.050113	0.047282	3	0.029646	0.036063	0.035258	0.0336557	3
OG1RF_11012_1012	OG1RF_11012_1012	Uncharacterized protein	Unknown	poorly characterized	Function unknown	1.40474	0.11525	0.16153	0.19362	0.1568	3	0.074116	0.14812	0.11263	0.111622	3
OG1RF_11624_1624	TpiA	Triosephosphate isomerase (TIM) (EC 5.3.1.1) (Triose-phosphate isomerase)	Cytoplasmic	Energy metabolism	Glycolysis/gluconeogenesis	1.3888	0.14886	0.083901	0.09184	0.1082	3	0.092803	0.072249	0.068675	0.077909	3
OG1RF_12322_2322	OG1RF_12322_2322	Uncharacterized protein	Unknown	poorly characterized	Function unknown	1.38387	0.062066	0.069381	0.050501	0.0606493	3	0.039726	0.048324	0.043428	0.043826	3
OG1RF_10199_199	Ldh	L-lactate dehydrogenase (L-LDH) (EC 1.1.1.27)	Cytoplasmic	Energy metabolism	Anaerobic	1.37913	0.087417	0.080997	0.059688	0.076034	3	0.067049	0.053436	0.044911	0.055132	3
OG1RF_10177_177	RpoA	DNA-directed RNA polymerase subunit alpha (RNAP subunit alpha) (EC 2.7.7.6) (RNA polymerase subunit alpha) (Transcriptase subunit alpha)	Cytoplasmic	Transcription	DNA-dependent RNA polymerase	1.37562	0.075276	0.060748	0.051398	0.062474	3	0.056741	0.043593	0.035911	0.045415	3
OG1RF_10019_19	ManX2	PTS family mannose porter, IIAB component (EC 2.7.1.69)	Cytoplasmic	Transport and binding proteins	Carbohydrates, organic alcohols, and acids	1.36274	0.080832	0.085226	0.10467	0.0902427	3	0.07055	0.065105	0.063009	0.0662213	3
OG1RF_11397_1397	OG1RF_11397_1397	DegV family protein	Cytoplasmic	poorly characterized	General	1.36246	0.0076253	0.015042		0.0113337	2	0.0066553	0.012144	0.0061562	0.0083185	3
OG1RF_11161_1161	OG1RF_11161_1161	DHH family protein	Cytoplasmic	poorly characterized	General function prediction only	1.35035	0.010103	0.0099649	0.0063234	0.0087971	3	0.0058785	0.0071509		0.0065147	2
OG1RF_10210_210	HslO	33 kDa chaperonin (Heat shock protein 33 homolog)	Cytoplasmic	cellular processes and signaling	Posttranslational modification, protein turnover, chaperones	1.35033	0.010747	0.0106	0.0067265	0.00935783	3	0.0062533	0.0076068		0.00693005	2
OG1RF_10348_348	SodA	Superoxide dismutase (EC 1.15.1.1)	Extracellular	metabolism	Inorganic ion transport and metabolism	1.34424	0.14269	0.11468	0.11412	0.12383	3	0.10148	0.10661	0.068267	0.092119	3
OG1RF_12519_2519	Gor	Glutathione-disulfide reductase (EC 1.8.1.7)	Cytoplasmic	Energy metabolism	Electron transport	1.33444	0.0095104	0.0070354	0.0089288	0.00849153	3		0.0050486	0.0076781	0.00636335	2
OG1RF_12264_2264	OG1RF_12264_2264	Phosphoglycerate mutase (EC 5.4.2.-)	Cytoplasmic	metabolism	Carbohydrate transport and metabolism	1.33427	0.018301		0.011454	0.0148775	2	0.010648	0.012953	0.0098499	0.0111503	3
OG1RF_10002_2	DnaN	DNA polymerase III subunit beta (EC 2.7.7.7)	Cytoplasmic	DNA metabolism	DNA replication, recombination, and repair	1.33005	0.03691	0.016803	0.013328	0.022347	3	0.022302	0.012058	0.016045	0.0168017	3
OG1RF_11088_1088	NagA	N-acetylglucosamine-6-phosphate deacetylase (EC 3.5.1.25) (GlcNAc 6-P deacetylase)	Cytoplasmic	Central intermediary metabolism	Amino sugars	1.32579	0.0139		0.01044	0.01217	2	0.0097057	0.0088548	0.0089778	0.00917943	3
OG1RF_10136_136	OG1RF_10136_136	Iron (Fe3+) ABC superfamily ATP binding cassette transporter, binding protein	Cytoplasmic Membrane	metabolism	Inorganic ion transport and metabolism	1.32443	0.030795	0.033749	0.038548	0.034364	3	0.035836	0.025429	0.016574	0.0259463	3
OG1RF_10783_783	OG1RF_10783_783	Response regulator	Cytoplasmic	cellular processes and signaling	Signal transduction mechanisms	1.32159	0.098326	0.050801	0.021979	0.0570353	3	0.036779	0.039769	0.052922	0.0431567	3
OG1RF_12305_2305	HtrA	Serine protease HtrA (EC 3.4.21.-)	Unknown	cellular processes and signaling	Posttranslational modification, protein turnover, chaperones	1.32134	0.11646	0.11008	0.091114	0.105885	3	0.095292	0.08243	0.062681	0.0801343	3
OG1RF_10576_576	SrmB	DEAD-box ATP-dependent RNA helicase CshA (EC 3.6.4.13)	Cytoplasmic	DNA metabolism	DNA replication, recombination, and repair	1.31954	0.033859	0.019645	0.024308	0.0259373	3	0.019122	0.025375	0.014472	0.0196563	3
OG1RF_11327_1327	PpaC	Probable manganese-dependent inorganic pyrophosphatase (EC 3.6.1.1) (Pyrophosphate phospho-hydrolase)	Cytoplasmic	metabolism	Energy production and conversion	1.31081	0.034661	0.030768	0.026033	0.0304873	3	0.027226	0.025759	0.01679	0.0232583	3
OG1RF_10146_146	FusA	Elongation factor G (EF-G)	Cytoplasmic	Protein synthesis	Translation factors	1.30752	0.17253	0.21424	0.23719	0.207987	3	0.16	0.11449	0.20272	0.15907	3
OG1RF_12092_2092	NusG	Transcription termination/antitermination protein NusG	Cytoplasmic	Transcription	Transcription factors	1.30193	0.041286	0.02327	0.038761	0.034439	3	0.025739	0.025048	0.02857	0.0264523	3
OG1RF_11825_1825	SufB	ABC superfamily ATP binding cassette transporter, membrane protein	Cytoplasmic	Biosynthesis of cofactors, prosthetic groups, and carriers	Other	1.30145	0.018406	0.013616	0.01296	0.014994	3	0.01004		0.013002	0.011521	2
OG1RF_11269_1269	Hup	DNA-binding protein HU	Cytoplasmic	DNA metabolism	DNA replication, recombination, and repair	1.2898	0.10558	0.069426	0.08811	0.0877053	3	0.081912	0.07473	0.047356	0.0679993	3
OG1RF_10967_967	OG1RF_10967_967	Uncharacterized protein	Unknown	poorly characterized	Function unknown	1.28735	0.04897	0.041056	0.032182	0.040736	3	0.034192	0.038994	0.021744	0.0316433	3
OG1RF_10153_153	RplW	50S ribosomal protein L23	Unknown	Protein synthesis	Ribosomal proteins: synthesis and modification	1.28497	0.088962	0.043873	0.03132	0.0547183	3	0.058234		0.026933	0.0425835	2
OG1RF_11970_1970	OG1RF_11970_1970	Glyoxalase	Cytoplasmic	poorly characterized	General function prediction only	1.28482	0.048021	0.032791	0.027744	0.0361853	3	0.03224	0.031375	0.020876	0.0281637	3
OG1RF_11744_1744	PepS	Aminopeptidase PepS (EC 3.4.11.-)	Cytoplasmic	metabolism	Amino acid transport and metabolism	1.28383	0.050835	0.047634	0.021477	0.039982	3	0.037713	0.026986	0.028729	0.0311427	3
OG1RF_11033_1033	OG1RF_11033_1033	Sulfatase domain protein	Cytoplasmic Membrane	Cell envelope	Biosynthesis and degradation of surface polysaccharides and lipopolysaccharides	1.28299	0.35889	0.38848	0.4069	0.384757	3	0.30394	0.30353	0.2922	0.29989	3
OG1RF_11204_1204	Pgi	Glucose-6-phosphate isomerase (GPI) (EC 5.3.1.9) (Phosphoglucose isomerase) (Phosphohexose isomerase)	Cytoplasmic	Energy metabolism	Glycolysis/gluconeogenesis	1.28276	0.05944	0.072699	0.073662	0.0686003	3	0.066405	0.047962	0.046069	0.0534787	3
OG1RF_11080_1080	DnaJ	Chaperone protein DnaJ	Cytoplasmic	Protein fate	Protein folding and stabilization	1.27809	0.021955	0.0081205	0.0077295	0.0126017	3	0.011976	0.008741	0.0088624	0.0098598	3
OG1RF_10971_971	YcgQ	Uncharacterized protein	Cytoplasmic Membrane	poorly characterized	Function unknown	1.27426	0.0074135	0.018281		0.0128472	2	0.0064704	0.011806	0.01197	0.0100821	3
OG1RF_11092_1092	OG1RF_11092_1092	ABC superfamily ATP binding cassette transporter, membrane protein	Cytoplasmic Membrane	cellular processes and signaling	Defense mechanisms	1.27375	0.0060587	0.0047807	0.0045505	0.00512997	3	0.005288	0.0038595	0.0029349	0.00402747	3
OG1RF_11170_1170	PepT	Peptidase T (EC 3.4.11.4) (Aminotripeptidase) (Tripeptide aminopeptidase)	Cytoplasmic	Protein fate	Degradation of proteins, peptides, and glycopeptides	1.27289	0.026101	0.018021	0.017154	0.0204253	3	0.0091124	0.022169	0.016858	0.0160465	3
OG1RF_11644_1644	AckA	Acetate kinase (EC 2.7.2.1) (Acetokinase)	Cytoplasmic	Energy metabolism	Fermentation	1.26805	0.12432	0.11463	0.096419	0.11179	3	0.10615	0.068866	0.08946	0.0881587	3
OG1RF_10540_540	OG1RF_10540_540	Oligopeptide ABC superfamily ATP binding cassette transporter, binding protein	Cellwall	metabolism	Amino acid transport and metabolism	1.26722	0.03932	0.042661	0.03507	0.039017	3	0.03775	0.029222	0.025396	0.0307893	3
OG1RF_10724_724	PbpC	Penicillin-binding protein C	Cytoplasmic Membrane	Cell envelope	Biosynthesis and degradation of surface polysaccharides and lipopolysaccharides	1.26282	0.093518	0.10785	0.089149	0.096839	3	0.0879	0.079431	0.062724	0.076685	3
OG1RF_11142_1142	PdhB	Pyruvate dehydrogenase complex E1 component beta subunit (EC 1.2.4.1)	Cytoplasmic	Energy metabolism	Pyruvate dehydrogenase	1.25686	0.15767	0.16199	0.27446	0.19804	3	0.19782	0.12903	0.14585	0.157567	3
OG1RF_12185_2185	FabD	Malonyl CoA-acyl carrier protein transacylase (EC 2.3.1.39)	Cytoplasmic	Fatty acid and phospholipid metabolism	Biosynthesis	1.25558	0.041458	0.037484	0.038923	0.0392883	3	0.042215	0.029344	0.022314	0.031291	3
OG1RF_10262_262	OG1RF_10262_262	S-layer protein	Unknown	poorly characterized	Function unknown	1.25277	0.079816	0.068885	0.12801	0.092237	3	0.092884	0.063556	0.064439	0.0736263	3
OG1RF_12231_2231	ValS	Valine--tRNA ligase (EC 6.1.1.9) (Valyl-tRNA synthetase)	Cytoplasmic	Protein synthesis	tRNA aminoacylation	1.24799	0.013344	0.020341	0.012528	0.0154043	3	0.012706	0.011592	0.012732	0.0123433	3
OG1RF_11144_1144	Lpd	Dihydrolipoyl dehydrogenase (EC 1.8.1.4)	Cytoplasmic	metabolism	Energy production and conversion	1.242	0.068432	0.062998	0.057822	0.063084	3	0.045791	0.060546	0.04604	0.0507923	3
OG1RF_11078_1078	DnaK	Chaperone protein DnaK (HSP70) (Heat shock 70 kDa protein) (Heat shock protein 70)	Cytoplasmic	Protein fate	Protein folding and stabilization	1.24083	0.14024	0.15388	0.14318	0.145767	3	0.15606	0.093055	0.10331	0.117475	3
OG1RF_10534_534	LeuS	Leucine--tRNA ligase (EC 6.1.1.4) (Leucyl-tRNA synthetase)	Cytoplasmic	Protein synthesis	tRNA aminoacylation	1.24039	0.0091132	0.012841	0.013445	0.0117997	3	0.012499	0.0055288	0.010511	0.00951293	3
OG1RF_10455_455	FruK2	Tagatose-6-phosphate kinase (EC 2.7.1.144)	Unknown	metabolism	Carbohydrate transport and metabolism	1.23706	0.035001	0.024166	0.029575	0.0295807	3	0.030549	0.018581	0.022606	0.023912	3
OG1RF_10422_422	Cbf	CMP-binding-factor 1	Cytoplasmic	poorly characterized	General function prediction only	1.23418	0.010199	0.01006	0.0063838	0.00888093	3	0.008902		0.0054896	0.0071958	2
OG1RF_10627_627	Aad	Aldehyde-alcohol dehydrogenase	Cytoplasmic	metabolism	Energy production and conversion	1.22635	0.023395	0.030362	0.027744	0.027167	3	0.022568	0.013073	0.030817	0.0221527	3
OG1RF_12488_2488	Dps	DNA starvation/stationary phase protection protein Dps	Cytoplasmic	metabolism	Inorganic ion transport and metabolism	1.22574	0.13775	0.12228	0.058195	0.106075	3	0.11421	0.073123	0.072286	0.0865397	3
OG1RF_11633_1633	HisS	Histidine--tRNA ligase (EC 6.1.1.21) (Histidyl-tRNA synthetase)	Cytoplasmic	Protein synthesis	tRNA aminoacylation	1.2254	0.0073964	0.0048636	0.006944	0.00640133	3	0.0064555	0.0052352	0.0039809	0.00522387	3
OG1RF_11278_1278	OG1RF_11278_1278	Uncharacterized protein	Cytoplasmic	poorly characterized	Function unknown	1.21175	0.1414	0.12552	0.086287	0.117736	3	0.074046	0.097579	0.11986	0.0971617	3
OG1RF_11141_1141	PdhA	Pyruvate dehydrogenase complex E1 component alpha subunit (EC 1.2.4.1)	Cytoplasmic	Energy metabolism	Pyruvate dehydrogenase	1.20999	0.14963	0.14475	0.13507	0.14315	3	0.13562	0.10082	0.11848	0.118307	3
OG1RF_11623_1623	Eno	Enolase (EC 4.2.1.11) (2-phospho-D-glycerate hydro-lyase) (2-phosphoglycerate dehydratase)	Cytoplasmic	Energy metabolism	Glycolysis/gluconeogenesis	1.20758	0.49176	0.55573	0.65657	0.56802	3	0.47234	0.44602	0.49278	0.47038	3
OG1RF_12097_2097	MurB	UDP-N-acetylenolpyruvoylglucosamine reductase (EC 1.3.1.98) (UDP-N-acetylmuramate dehydrogenase)	Cytoplasmic	Cell envelope	Biosynthesis and degradation of murein sacculus and peptidoglycan	1.19808	0.014475	0.017847	0.01359	0.015304	3	0.018951	0.0076842	0.011686	0.0127737	3
OG1RF_11626_1626	Gap2	Glyceraldehyde-3-phosphate dehydrogenase (EC 1.2.1.-)	Cytoplasmic	Energy metabolism	Glycolysis/gluconeogenesis	1.19224	0.83672	0.72095	1.0775	0.87839	3	0.7107	0.67392	0.82564	0.736753	3
OG1RF_12164_2164	OG1RF_12164_2164	ErfK/YbiS/YcfS/YnhG family protein	Unknown	poorly characterized	Function unknown	1.18897	0.11763	0.14886	0.11044	0.125643	3	0.12979	0.10839	0.078841	0.105674	3
OG1RF_11303_1303	SrpG2	Cysteine synthase (EC 2.5.1.47)	Cytoplasmic	Amino acid biosynthesis	Serine family	1.18803	0.010331	0.016983		0.013657	2	0.012022	0.010969		0.0114955	2
OG1RF_12538_2538	GuaB	Inosine-5'-monophosphate dehydrogenase (IMP dehydrogenase) (IMPD) (IMPDH) (EC 1.1.1.205)	Cytoplasmic	Purines, pyrimidines, nucleosides, and nucleotides	Purine ribonucleotide biosynthesis	1.18097		0.0084745	0.0040332	0.00625385	3	0.0037495	0.0068415		0.0052955	2
OG1RF_10439_439	PrfC	Peptide chain release factor 3 (RF-3)	Cytoplasmic	Protein synthesis	Translation factors	1.17803	0.0040746	0.0060284	0.0038254	0.0046428	3	0.0035563	0.004326		0.00394115	2
OG1RF_10191_191	OG1RF_10191_191	Amino acid ABC superfamily ATP binding cassette transporter, membrane protein	Cytoplasmic Membrane	Transport and binding proteins	Amino acids, peptides and amines	1.17565	0.068432	0.050141	0.044055	0.0542093	3	0.058021	0.051896	0.028413	0.04611	3
OG1RF_10505_505	ClpP	ATP-dependent Clp protease proteolytic subunit (EC 3.4.21.92) (Endopeptidase Clp)	Cytoplasmic	Protein fate	Degradation of proteins, peptides, and glycopeptides	1.16627	0.065028	0.058795	0.030526	0.0514497	3	0.042567	0.046027	0.04375	0.0441147	3
OG1RF_12391_2391	Gmk2	Guanylate kinase (EC 2.7.4.8) (GMP kinase)	Cytoplasmic	Purines, pyrimidines, nucleosides, and nucleotides	Nucleotide and nucleoside interconversions	1.16299	0.015699		0.009826	0.0127625	2	0.0091347	0.011112	0.012675	0.0109739	3
OG1RF_10158_158	RplP	50S ribosomal protein L16	Cytoplasmic	Protein synthesis	Ribosomal proteins: synthesis and modification	1.16297	0.051894	0.051186	0.076561	0.0598803	3		0.055096	0.047882	0.051489	2
OG1RF_11329_1329	PflB	Formate acetyltransferase (EC 2.3.1.54)	Cytoplasmic	Energy metabolism	Fermentation	1.16064	0.022835	0.026746	0.020099	0.0232267	3	0.021176	0.022729	0.016131	0.020012	3
OG1RF_12169_2169	YeeN	Probable transcriptional regulatory protein OG1RF_12169	Cytoplasmic	Regulatory functions	DNA interactions	1.15124	0.044667	0.026434	0.025161	0.0320873	3	0.02729	0.028454		0.027872	2
OG1RF_10197_197	AmiD	N-acetylmuramoyl-L-alanine amidase	Cytoplasmic Membrane	Cell envelope	Surface structures	1.15023	0.24832	0.25958	0.34471	0.284203	3	0.25933	0.1735	0.30842	0.247083	3
OG1RF_12253_2253	OG1RF_12253_2253	Extracellular protein	Extracellular	poorly characterized	Function unknown	1.14932	0.069926	0.059775	0.061273	0.063658	3	0.052894	0.064342	0.048927	0.0553877	3
OG1RF_12511_2511	OG1RF_12511_2511	Secreted protein	Unknown	poorly characterized	Function unknown	1.1472	0.030501	0.015042	0.028636	0.0247263	3	0.019966	0.032383	0.012312	0.0215537	3
OG1RF_10915_915	DkgB	2,5-diketo-D-gluconate reductase (EC 1.1.1.274)	Cytoplasmic	poorly characterized	General function prediction only	1.1463	0.033131	0.036309	0.024192	0.0312107	3	0.025703	0.035175	0.020804	0.0272273	3
OG1RF_10878_878	OG1RF_10878_878	Collagen adhesin protein	Cellwall	Cell envelope	Other	1.13039	0.052268	0.045305	0.049072	0.0488817	3	0.051149	0.050449	0.028132	0.0432433	3
OG1RF_11828_1828	SufD	Iron-sulfur ABC superfamily ATP binding cassette transporter, membrane protein	Cytoplasmic	Biosynthesis of cofactors, prosthetic groups, and carriers	Other	1.11828	0.019954	0.0098407	0.0070252	0.0122733	3	0.010885	0.0079445	0.014096	0.0109752	3
OG1RF_12102_2102	TrxB2	Thioredoxin-disulfide reductase (EC 1.8.1.9)	Cytoplasmic	cellular processes and signaling	Posttranslational modification, protein turnover, chaperones	1.11206	0.016709	0.021975	0.019174	0.019286	3	0.022686	0.0098558	0.019486	0.0173426	3
OG1RF_12007_2007	GroS	10 kDa chaperonin (GroES protein) (Protein Cpn10)	Cytoplasmic	Protein fate	Protein folding and stabilization	1.10944	0.0647	0.031908	0.050619	0.0490757	3	0.018823		0.069646	0.0442345	2
OG1RF_11692_1692	GlmS	Glutamine--fructose-6-phosphate aminotransferase [isomerizing] (EC 2.6.1.16) (D-fructose-6-phosphate amidotransferase) (GFAT) (Glucosamine-6-phosphate synthase) (Hexosephosphate aminotransferase) (L-glutamine--D-fructose-6-phosphate amidotransferase)	Cytoplasmic	Cell envelope	Biosynthesis and degradation of murein sacculus and peptidoglycan	1.10181	0.023053	0.01924	0.018314	0.0202023	3	0.023216	0.013179	0.018612	0.0183357	3
OG1RF_12333_2333	MreC	Cell shape-determining protein MreC (Cell shape protein MreC)	Unknown	Cell envelope	Biosynthesis and degradation of murein sacculus and peptidoglycan	1.10168	0.10078	0.073634	0.084105	0.086173	3	0.065157	0.091149	0.078352	0.0782193	3
OG1RF_10452_452	Tig	Trigger factor (TF) (EC 5.2.1.8) (PPIase)	Cytoplasmic	Protein fate	Protein folding and stabilization	1.09847	0.056575	0.060654	0.050806	0.0560117	3	0.047231	0.060066	0.045675	0.0509907	3
OG1RF_12168_2168	OG1RF_12168_2168	PFL4705 family integrating conjugative element protein	Cytoplasmic Membrane	Cell envelope	Biosynthesis and degradation of surface polysaccharides and lipopolysaccharides	1.09317	0.0077358	0.011445	0.010894	0.0100249	3	0.010128	0.0082131		0.00917055	2
OG1RF_12142_2142	GalE4	UDP-glucose 4-epimerase (EC 5.1.3.2)	Cytoplasmic	Energy metabolism	Sugars	1.08888	0.02588	0.025526	0.024297	0.0252343	3	0.025411	0.020607	0.023506	0.0231747	3
OG1RF_10166_166	RplF	50S ribosomal protein L6	Unknown	Protein synthesis	Ribosomal proteins: synthesis and modification	1.08251	0.12595	0.1538	0.20833	0.162693	3	0.14133	0.14008	0.16947	0.150293	3
OG1RF_12199_2199	Tig3	Peptidyl-prolyl cis-trans isomerase (EC 5.2.1.8)	Cytoplasmic	Protein fate	Protein folding and stabilization	1.08075	0.027233	0.021489	0.010227	0.0196497	3	0.019015	0.017348		0.0181815	2
OG1RF_10778_778	PfkA	ATP-dependent 6-phosphofructokinase (ATP-PFK) (Phosphofructokinase) (EC 2.7.1.11) (Phosphohexokinase)	Cytoplasmic	Energy metabolism	Glycolysis/gluconeogenesis	1.07836	0.090074	0.088843	0.17539	0.118102	3	0.1252	0.095632	0.10773	0.109521	3
OG1RF_10170_170	RplO	50S ribosomal protein L15	Unknown	Protein synthesis	Ribosomal proteins: synthesis and modification	1.07223	0.058496	0.064908	0.048053	0.0571523	3	0.044673	0.062105	0.053129	0.0533023	3
OG1RF_10226_226	FabF	3-oxoacyl-[acyl-carrier-protein] synthase 2 (EC 2.3.1.179)	Cytoplasmic Membrane	Fatty acid and phospholipid metabolism	Biosynthesis	1.06989	0.018138	0.023002	0.017029	0.0193897	3	0.020354	0.011004	0.023011	0.018123	3
OG1RF_11625_1625	Pgk	Phosphoglycerate kinase (EC 2.7.2.3)	Cytoplasmic	Energy metabolism	Glycolysis/gluconeogenesis	1.06626	0.12638	0.13261	0.11613	0.12504	3	0.1197	0.11705	0.11506	0.11727	3
OG1RF_10705_705	RpmA	50S ribosomal protein L27	Cytoplasmic	Protein synthesis	Ribosomal proteins: synthesis and modification	1.06487	0.033712	0.077586	0.05275	0.0546827	3	0.049039	0.059653	0.045362	0.0513513	3
OG1RF_10162_162	RplX	50S ribosomal protein L24	Cytoplasmic	Protein synthesis	Ribosomal proteins: synthesis and modification	1.06277	0.031094	0.030669		0.0308815	2		0.033012	0.025103	0.0290575	2
OG1RF_11302_1302	AmiD3	N-acetylmuramoyl-L-alanine amidase (EC 3.5.1.28)	Extracellular	Cell envelope	Surface structures	1.06113	0.46285	0.47125	0.75695	0.563683	3	0.54406	0.44385	0.60572	0.53121	3
OG1RF_10948_948	RpmE	50S ribosomal protein L31 type B	Cytoplasmic	Protein synthesis	Ribosomal proteins: synthesis and modification	1.0598	0.043133	0.063816	0.040495	0.049148	3	0.047058	0.057243	0.034823	0.0463747	3
OG1RF_10954_954	LuxS	S-ribosylhomocysteine lyase (EC 4.4.1.21) (AI-2 synthesis protein) (Autoinducer-2 production protein LuxS)	Cytoplasmic	cellular processes and signaling	Signal transduction mechanisms	1.05599	0.04214	0.048492	0.072532	0.054388	3	0.055169	0.059653	0.039691	0.0515043	3
OG1RF_12105_2105	LplA2	Lipoate--protein ligase (EC 2.7.7.63)	Cytoplasmic	Protein fate	Protein modification and repair	1.05396	0.031962	0.028373	0.015004	0.025113	3	0.027897	0.020361	0.023224	0.0238273	3
OG1RF_12147_2147	Glk	Glucokinase (EC 2.7.1.2)	Cytoplasmic	poorly characterized	General	1.05394	0.046271	0.032599	0.037235	0.0387017	3	0.040385	0.03509	0.034688	0.036721	3
OG1RF_11985_1985	AtpC2	ATP synthase epsilon chain (ATP synthase F1 sector epsilon subunit) (F-ATPase epsilon subunit)	Cytoplasmic	Energy metabolism	ATP-proton motive force interconversion	1.05322		0.01515	0.014421	0.0147855	2	0.013406	0.016308	0.012401	0.0140383	3
OG1RF_12384_2384	OG1RF_12384_2384	Non-specific serine/threonine protein kinase (EC 2.7.1.-)	Cytoplasmic Membrane	poorly characterized	General function prediction only	1.04847	0.008921	0.0073326	0.016751	0.0110015	3	0.010382	0.0078928	0.013204	0.0104929	3
OG1RF_12374_2374	OG1RF_12374_2374	DAK2 domain protein	Cytoplasmic	poorly characterized	General function prediction only	1.04261	0.015305	0.013209	0.014369	0.0142943	3	0.021707	0.010156	0.0092674	0.0137101	3
OG1RF_10134_134	DeoD	Purine nucleoside phosphorylase (EC 2.4.2.1) (Inosine-guanosine phosphorylase)	Cytoplasmic	Purines, pyrimidines, nucleosides, and nucleotides	Other	1.01622	0.011774		0.014739	0.0132565	2	0.017128	0.012501	0.0095059	0.013045	3
OG1RF_11470_1470	PstS2	Phosphate ABC superfamily ATP binding cassette transporter, binding protein	Cytoplasmic Membrane	Transport and binding proteins	Anions	1.01499	0.075179	0.055614	0.063523	0.064772	3	0.072177	0.079818	0.039452	0.0638157	3
OG1RF_11832_1832	Tsf	Elongation factor Ts (EF-Ts)	Cytoplasmic	Protein synthesis	Translation factors	1.01468	0.20768	0.1725	0.12999	0.170057	3	0.17172	0.16634	0.16473	0.167597	3
OG1RF_12191_2191	GlxR	2-hydroxy-3-oxopropionate reductase (EC 1.1.1.60)	Unknown	metabolism	Lipid transport and metabolism	1.01365	0.018033	0.028458	0.023702	0.0233977	3	0.034626	0.022975	0.011647	0.0230827	3
OG1RF_10147_147	Tuf	Elongation factor Tu (EF-Tu)	Cytoplasmic	Protein synthesis	Translation factors	1.01215	0.32161	0.3812	0.33493	0.345913	3	0.3727	0.30129	0.35129	0.34176	3
OG1RF_11156_1156	OG1RF_11156_1156	Uncharacterized protein	Unknown	poorly characterized	Function unknown	1.01207	0.0085861		0.005374	0.00698005	2	0.0099919	0.0060773	0.0046213	0.00689683	3
OG1RF_11358_1358	HslU	ATP-dependent protease ATPase subunit HslU (Unfoldase HslU)	Cytoplasmic	Protein fate	Degradation of proteins, peptides, and glycopeptides	1.00992	0.0091438	0.0090189	0.0085846	0.00891577	3	0.0099758	0.007281	0.0092277	0.00882817	3
OG1RF_10435_435	OG1RF_10435_435	UPF0374 protein OG1RF_10435	Cytoplasmic	information storage and processing	Translation, ribosomal structure and biogenesis	1.0081	0.012063	0.011898	0.011325	0.011762	3	0.010528	0.012807		0.0116675	2
OG1RF_10351_351	NagB	Glucosamine-6-phosphate deaminase (EC 3.5.99.6) (GlcN6P deaminase) (Glucosamine-6-phosphate isomerase)	Cytoplasmic	Central intermediary metabolism	Amino sugars	1.00808	0.0091635	0.0090383	0.008603	0.00893493	3	0.0079978	0.0097289		0.00886335	2
OG1RF_10069_69	OG1RF_10069_69	Uncharacterized protein	Cytoplasmic Membrane	poorly characterized	Function unknown	1.00806	0.011237	0.011084	0.01055	0.010957	3	0.0098078	0.011931		0.0108694	2
OG1RF_12180_2180	AccC	Acetyl-CoA carboxylase subunit A (EC 6.4.1.2)	Cytoplasmic	Fatty acid and phospholipid metabolism	Biosynthesis	1.00594	0.02107	0.013855	0.013188	0.0160377	3	0.01839	0.012428	0.017011	0.015943	3
OG1RF_12214_2214	GreA	Transcription elongation factor GreA (Transcript cleavage factor GreA)	Cytoplasmic	Transcription	Transcription factors	0.999058	0.034071	0.033605	0.042649	0.036775	3	0.034693	0.04823	0.027506	0.0368097	3
OG1RF_10533_533	Lyzl6	Cell wall lysis protein (EC 3.2.1.17)	Extracellular	Cellular processes	Sporulation and germination	0.9985	0.16803	0.17145	0.18631	0.175263	3	0.17067	0.16763	0.18828	0.175527	3
OG1RF_10008_8	Ssb	Single-stranded DNA-binding protein (SSB)	Cytoplasmic	DNA metabolism	DNA replication, recombination, and repair	0.997151	0.079498	0.039206	0.063974	0.0608927	3	0.049561	0.060288	0.073351	0.0610667	3
OG1RF_10330_330	MenB	1,4-dihydroxy-2-naphthoyl-CoA synthase (DHNA-CoA synthase) (EC 4.1.3.36)	Cytoplasmic	Biosynthesis of cofactors, prosthetic groups, and carriers	Menaquinone and ubiquinone	0.997107	0.036939	0.018217	0.05202	0.0357253	3	0.035464	0.039218	0.032805	0.035829	3
OG1RF_11266_1266	Cmk	Cytidylate kinase (CK) (EC 2.7.4.25) (Cytidine monophosphate kinase)	Cytoplasmic	Purines, pyrimidines, nucleosides, and nucleotides	Nucleotide and nucleoside interconversions	0.990636	0.037789	0.0093182	0.026609	0.0245721	3	0.028859	0.015045	0.030509	0.0248043	3
OG1RF_10671_671	OG1RF_10671_671	Extracellular protein	Unknown	poorly characterized	Function unknown	0.980081	0.27872	0.25676	0.24192	0.259133	3	0.29146	0.25125	0.25049	0.2644	3
OG1RF_10779_779	Pyk	Pyruvate kinase (EC 2.7.1.40)	Cytoplasmic	Energy metabolism	Glycolysis/gluconeogenesis	0.975417	0.11862	0.1188	0.14905	0.128823	3	0.13697	0.11044	0.1488	0.13207	3
OG1RF_11931_1931	Upp2	Uracil phosphoribosyltransferase (EC 2.4.2.9) (UMP pyrophosphorylase) (UPRTase)	Cytoplasmic	Purines, pyrimidines, nucleosides, and nucleotides	Salvage of nucleosides and nucleotides	0.969661	0.045971	0.050381	0.043159	0.0465037	3	0.057955	0.048807	0.037114	0.0479587	3
OG1RF_10175_175	RpsM	30S ribosomal protein S13	Cytoplasmic	Protein synthesis	Ribosomal proteins: synthesis and modification	0.966885	0.052936	0.034809	0.057982	0.0485757	3	0.030801	0.084303	0.035614	0.0502393	3
OG1RF_12509_2509	OG1RF_12509_2509	Pheromone cAD1 lipoprotein	Unknown	poorly characterized	Function unknown	0.964439	0.10365	0.11927	0.13299	0.118637	3	0.13569	0.13572	0.097623	0.123011	3
OG1RF_10665_665	OG1RF_10665_665	ABC superfamily ATP binding cassette transporter, ABC protein (EC 3.6.3.-)	Cytoplasmic Membrane	metabolism	Carbohydrate transport and metabolism	0.960373	0.0087265	0.0086073	0.0054619	0.00759857	3	0.0050776	0.009265	0.0093937	0.0079121	3
OG1RF_12439_2439	RecA	Protein RecA (Recombinase A)	Cytoplasmic	DNA metabolism	DNA replication, recombination, and repair	0.954956	0.030677	0.033283	0.01728	0.02708	3	0.048194	0.019542	0.017336	0.0283573	3
OG1RF_10462_462	GatA	Glutamyl-tRNA(Gln) amidotransferase subunit A (Glu-ADT subunit A) (EC 6.3.5.7)	Cytoplasmic	Protein synthesis	tRNA aminoacylation	0.952022	0.026197	0.021533	0.018446	0.0220587	3	0.022865	0.025496	0.02115	0.0231703	3
OG1RF_10251_251	OG1RF_10251_251	Chitin-binding protein/carbohydrate-binding protein	Extracellular	poorly characterized	Function unknown	0.945692	0.35218	0.74358	0.28931	0.46169	3	0.46587	0.27459	0.72415	0.488203	3
OG1RF_10730_730	FtsZ	Cell division protein FtsZ	Unknown	Cellular processes	Cell division	0.944931	0.039056	0.043659	0.034223	0.0389793	3	0.040906	0.038702	0.044145	0.041251	3
OG1RF_11405_1405	OG1RF_11405_1405	Uncharacterized protein	Unknown	poorly characterized	Function unknown	0.944914	0.017035	0.016803	0.015993	0.0166103	3	0.014868	0.024115	0.013753	0.0175787	3
OG1RF_11938_1938	OG1RF_11938_1938	Fumarate reductase (EC 1.3.99.1)	Unknown	Energy metabolism	Electron transport	0.941861	0.33823	0.31276	0.28182	0.310937	3	0.30812	0.39726	0.28501	0.33013	3
OG1RF_10152_152	RplD	50S ribosomal protein L4	Cytoplasmic	Protein synthesis	Ribosomal proteins: synthesis and modification	0.940856	0.17019	0.14752	0.2082	0.175303	3	0.20255	0.21902	0.1374	0.186323	3
OG1RF_12067_2067	OG1RF_12067_2067	Tellurite resistance protein	Cytoplasmic	metabolism	Inorganic ion transport and metabolism	0.93948	0.0081079	0.0053314	0.0076121	0.00701713	3	0.0094354	0.0086082	0.0043639	0.00746917	3
OG1RF_11732_1732	RmlB	dTDP-glucose 4,6-dehydratase (EC 4.2.1.46)	Cytoplasmic	Cell envelope	Biosynthesis and degradation of surface polysaccharides and lipopolysaccharides	0.935769	0.0093644	0.0061577		0.00776105	2	0.0081732	0.0066281	0.01008	0.00829377	3
OG1RF_11454_1454	PepQ2	Xaa-Pro dipeptidase (EC 3.4.13.9)	Cytoplasmic	metabolism	Amino acid transport and metabolism	0.928869	0.011635	0.011476	0.0081928	0.0104346	3	0.012694	0.009265	0.011742	0.0112337	3
OG1RF_11400_1400	Apt	Adenine phosphoribosyltransferase (APRT) (EC 2.4.2.7)	Cytoplasmic	Purines, pyrimidines, nucleosides, and nucleotides	Salvage of nucleosides and nucleotides	0.926217	0.031398	0.018582	0.023582	0.0245207	3	0.027404	0.026669	0.025349	0.026474	3
OG1RF_12081_2081	RplJ	50S ribosomal protein L10	Cytoplasmic	Protein synthesis	Ribosomal proteins: synthesis and modification	0.923988	0.25724	0.24738	0.22339	0.24267	3	0.26942	0.30042	0.21806	0.262633	3
OG1RF_10099_99	ArcA	Arginine deiminase (ADI) (EC 3.5.3.6) (Arginine dihydrolase)	Cytoplasmic	Energy metabolism	Amino acids and amines	0.909821	0.041864	0.041293	0.039304	0.0408203	3	0.045674	0.036114	0.052811	0.0448663	3
OG1RF_11979_1979	AzoR	FMN-dependent NADH-azoreductase (EC 1.7.-.-) (Azo-dye reductase) (FMN-dependent NADH-azo compound oxidoreductase)	Cytoplasmic	metabolism	Lipid transport and metabolism	0.908616	0.051324	0.045561	0.028911	0.041932	3	0.049275	0.043593	0.04558	0.0461493	3
OG1RF_10154_154	RplB	50S ribosomal protein L2	Unknown	Protein synthesis	Ribosomal proteins: synthesis and modification	0.903543	0.1083	0.10682	0.1162	0.11044	3	0.12153	0.11088	0.13428	0.12223	3
OG1RF_10178_178	RplQ	50S ribosomal protein L17	Cytoplasmic	Protein synthesis	Ribosomal proteins: synthesis and modification	0.896156	0.075653	0.041455	0.063134	0.0600807	3	0.044019	0.089245	0.067864	0.0670427	3
OG1RF_11798_1798	Xpt	Xanthine phosphoribosyltransferase (XPRTase) (EC 2.4.2.22)	Cytoplasmic	Purines, pyrimidines, nucleosides, and nucleotides	Salvage of nucleosides and nucleotides	0.891892	0.044251	0.027279	0.031158	0.0342293	3	0.053105	0.035236	0.026794	0.0383783	3
OG1RF_11429_1429	PyrC	Dihydroorotase (DHOase) (EC 3.5.2.3)	Cytoplasmic	Purines, pyrimidines, nucleosides, and nucleotides	Pyrimidine ribonucleotide biosynthesis	0.887277	0.01	0.0049319	0.0070416	0.0073245	3	0.0087283	0.0079631	0.0080737	0.00825503	3
OG1RF_12508_2508	OG1RF_12508_2508	Thiamine biosynthesis lipoprotein	Unknown	metabolism	Coenzyme transport and metabolism	0.883925	0.0090215	0.01483	0.011293	0.0117148	3	0.015748	0.019156	0.0048556	0.0132532	3
OG1RF_11840_1840	GlyQ	Glycine--tRNA ligase alpha subunit (EC 6.1.1.14) (Glycyl-tRNA synthetase alpha subunit)	Cytoplasmic	Protein synthesis	tRNA aminoacylation	0.88234	0.013643	0.020185	0.025617	0.019815	3	0.032745	0.018106	0.016521	0.0224573	3
OG1RF_10370_370	OG1RF_10370_370	Uncharacterized protein	Unknown	poorly characterized	Function unknown	0.867821	0.056002	0.055237	0.059149	0.056796	3	0.070263	0.078038	0.048039	0.0654467	3
OG1RF_12181_2181	FabZ	3-hydroxyacyl-[acyl-carrier-protein] dehydratase FabZ (EC 4.2.1.59) ((3R)-hydroxymyristoyl-[acyl-carrier-protein] dehydratase) (Beta-hydroxyacyl-ACP dehydratase)	Cytoplasmic	Fatty acid and phospholipid metabolism	Biosynthesis	0.867375	0.045427	0.059742	0.042649	0.0492727	3	0.059473	0.080384	0.030563	0.0568067	3
OG1RF_11800_1800	OG1RF_11800_1800	Family 4 N-acetylmuramoyl-L-alanine amidase	Extracellular	Cell envelope	Surface structures	0.865916	0.015036	0.019774	0.032938	0.0225827	3		0.031927	0.020232	0.0260795	2
OG1RF_10287_287	Pcp	Pyrrolidone-carboxylate peptidase (EC 3.4.19.3) (5-oxoprolyl-peptidase) (Pyroglutamyl-peptidase I)	Cytoplasmic	Protein fate	Degradation of proteins, peptides, and glycopeptides	0.858453	0.024712	0.024374	0.02784	0.025642	3	0.030195	0.031484	0.027931	0.02987	3
OG1RF_12083_2083	RplK	50S ribosomal protein L11	Cytoplasmic	Protein synthesis	Ribosomal proteins: synthesis and modification	0.858087	0.19063	0.17299	0.22193	0.195183	3	0.17969	0.29954	0.20316	0.227463	3
OG1RF_11477_1477	YfiA	Ribosomal subunit interface protein	Cytoplasmic	Protein synthesis	Translation factors	0.856565	0.073429	0.055712	0.09015	0.073097	3	0.10846	0.10195	0.045602	0.0853373	3
OG1RF_12063_2063	MtnN	5'-methylthioadenosine/S-adenosylhomocysteine nucleosidase (EC 3.2.2.9) (5'-methylthioadenosine/S-adenosylhomocysteine nucleosidase 1) (5'-methylthioadenosine/S-adenosylhomocysteine nucleosidase 2)	Cytoplasmic	Central intermediary metabolism	Other	0.85209	0.036971	0.031908	0.052065	0.0403147	3	0.044369	0.049065	0.048504	0.0473127	3
OG1RF_12535_2535	OG1RF_12535_2535	Response regulator	Cytoplasmic	cellular processes and signaling	Signal transduction mechanisms	0.849933	0.032632	0.027588	0.030637	0.0302857	3	0.028481	0.044545	0.033873	0.035633	3
OG1RF_11464_1464	OG1RF_11464_1464	Uncharacterized protein	Cytoplasmic	poorly characterized	Function unknown	0.84662	0.011418	0.011262	0.0089328	0.0105376	3	0.014948	0.010102	0.01229	0.0124467	3
OG1RF_10945_945	FbaB	Fructose-bisphosphate aldolase (EC 4.1.2.13)	Cytoplasmic	Energy metabolism	Glycolysis/gluconeogenesis	0.842272	0.15145	0.1093	0.23929	0.16668	3	0.19667	0.18825	0.20876	0.197893	3
OG1RF_11731_1731	RfbD	dTDP-4-dehydrorhamnose reductase (EC 1.1.1.133)	Cytoplasmic	Cell envelope	Biosynthesis and degradation of surface polysaccharides and lipopolysaccharides	0.841595	0.042845	0.028173	0.036872	0.0359633	3	0.052975	0.049279	0.025943	0.0427323	3
OG1RF_10144_144	RpsL	30S ribosomal protein S12	Cytoplasmic	Protein synthesis	Ribosomal proteins: synthesis and modification	0.826824	0.038961	0.030743	0.021947	0.0305503	3	0.040806	0.033092		0.036949	2
OG1RF_12486_2486	RpsI3	30S ribosomal protein S9	Cytoplasmic	Protein synthesis	Ribosomal proteins: synthesis and modification	0.825431	0.065695	0.080997	0.084806	0.077166	3	0.07884	0.12206	0.079557	0.0934857	3
OG1RF_10338_338	Ohr	Organic hydroperoxide resistance protein	Cytoplasmic	Cellular processes	Detoxification	0.819707	0.040133	0.07917	0.090429	0.0699107	3	0.056045	0.076697	0.12312	0.0852873	3
OG1RF_11243_1243	OG1RF_11243_1243	Uncharacterized protein	Unknown	poorly characterized	Function unknown	0.815826	0.027809	0.01981	0.026108	0.0245757	3	0.029665	0.029524	0.031182	0.0301237	3
OG1RF_11855_1855	ProC	Pyrroline-5-carboxylate reductase (P5C reductase) (P5CR) (EC 1.5.1.2) (PCA reductase)	Cytoplasmic	Amino acid biosynthesis	Glutamate family	0.811932	0.0082119		0.0077097	0.0079608	2	0.010751	0.0087186	0.0099447	0.00980477	3
OG1RF_11300_1300	Tkt	Transketolase (EC 2.2.1.1)	Cytoplasmic	Energy metabolism	Pentose phosphate pathway	0.80921	0.022407	0.02368	0.021037	0.0223747	3	0.030732	0.02379	0.028428	0.02765	3
OG1RF_10924_924	PyrG	CTP synthase (EC 6.3.4.2) (CTP synthetase) (UTP--ammonia ligase)	Cytoplasmic	Purines, pyrimidines, nucleosides, and nucleotides	Pyrimidine ribonucleotide biosynthesis	0.804726		0.0098224	0.0093494	0.0095859	2	0.013907	0.010573	0.011256	0.011912	3
OG1RF_10281_281	OG1RF_10281_281	Secreted antigen	Extracellular	poorly characterized	Function unknown	0.802801	1.5068	1.7076	1.5544	1.5896	3	1.6491	2.3671	1.924	1.98007	3
OG1RF_11581_1581	ClpX	ATP-dependent Clp protease ATP-binding subunit ClpX	Cytoplasmic	Protein fate	Degradation of proteins, peptides, and glycopeptides	0.801635	0.0076802	0.0050502	0.0072105	0.00664697	3	0.011172	0.005436	0.0082673	0.00829177	3
OG1RF_12103_2103	AhpC	Peroxiredoxin (EC 1.11.1.15)	Cytoplasmic	Cellular processes	Detoxification	0.800191	0.15414	0.10699	0.10719	0.122773	3	0.16443	0.15759	0.13827	0.15343	3
OG1RF_10165_165	RpsH	30S ribosomal protein S8	Cytoplasmic	Protein synthesis	Ribosomal proteins: synthesis and modification	0.798915	0.16175	0.23133	0.30371	0.232263	3	0.33176	0.26618	0.27423	0.290723	3
OG1RF_12336_2336	Def	Peptide deformylase (PDF) (EC 3.5.1.88) (Polypeptide deformylase)	Unknown	Protein fate	Protein modification and repair	0.796372	0.017126	0.016892	0.010719	0.0149123	3	0.014948	0.018183	0.023045	0.0187253	3
OG1RF_11246_1246	Gap	Glyceraldehyde-3-phosphate dehydrogenase (EC 1.2.1.12)	Cytoplasmic	Energy metabolism	Glycolysis/gluconeogenesis	0.796332	0.012709	0.0094014	0.011932	0.0113475	3	0.013865	0.013493	0.015391	0.0142497	3
OG1RF_11807_1807	OG1RF_11807_1807	Peptidase propeptide and YPEB domain protein	Cytoplasmic Membrane	poorly characterized	Function unknown	0.789945	0.043447	0.055097	0.046617	0.048387	3	0.059588	0.079075	0.045098	0.0612537	3
OG1RF_10731_731	YlmE	YggS family pyridoxal phosphate enzyme	Cytoplasmic	poorly characterized	Enzymes of unknown specificity	0.787882	0.028468	0.018719	0.017818	0.0216683	3	0.033129	0.030224	0.019153	0.027502	3
OG1RF_12362_2362	FtsY	Signal recognition particle receptor FtsY (SRP receptor)	Cytoplasmic Membrane	Protein fate	Protein and peptide secretion and trafficking	0.786444	0.0048305		0.0045351	0.0046828	2	0.004216	0.0076928		0.0059544	2
OG1RF_10206_206	OG1RF_10206_206	S1 RNA-binding domain protein	Cytoplasmic	information storage and processing	Translation, ribosomal structure and biogenesis	0.777679	0.026856	0.013245	0.012607	0.0175693	3	0.01758	0.028514	0.021682	0.022592	3
OG1RF_10150_150	RpsJ	30S ribosomal protein S10	Cytoplasmic	Protein synthesis	Ribosomal proteins: synthesis and modification	0.774489	0.10301	0.073892	0.1055	0.094134	3	0.11442	0.12925	0.12096	0.121543	3
OG1RF_11805_1805	AsnS	Asparagine--tRNA ligase (EC 6.1.1.22) (Asparaginyl-tRNA synthetase)	Cytoplasmic	Protein synthesis	tRNA aminoacylation	0.773391	0.0047446	0.0046798	0.0066817	0.0053687	3	0.0062116	0.0050374	0.0095763	0.00694177	3
OG1RF_10145_145	RpsG	30S ribosomal protein S7	Cytoplasmic	Protein synthesis	Ribosomal proteins: synthesis and modification	0.77112	0.088962	0.053998	0.096371	0.079777	3	0.083618	0.11625	0.1105	0.103456	3
OG1RF_11882_1882	OG1RF_11882_1882	PDZ domain protein	Unknown	cellular processes and signaling	Signal transduction mechanisms	0.761009	0.0089962	0.0088733	0.0056306	0.00783337	3	0.0078518	0.012735		0.0102934	2
OG1RF_12183_2183	FabF2	3-oxoacyl-[acyl-carrier-protein] synthase 2 (EC 2.3.1.179)	Cytoplasmic Membrane	Fatty acid and phospholipid metabolism	Biosynthesis	0.760874	0.023377	0.017934	0.0073157	0.0162089	3	0.034005	0.011031	0.018873	0.021303	3
OG1RF_10072_72	OG1RF_10072_72	Stress response regulator Gls24	Cytoplasmic	poorly characterized	Function unknown	0.755343	0.051655	0.062272	0.075439	0.063122	3	0.085159	0.091404	0.074139	0.0835673	3
OG1RF_10124_124	OG1RF_10124_124	ABC superfamily ATP binding cassette transporter, binding protein	Unknown	poorly characterized	General function prediction only	0.755122	0.080739	0.073737	0.067378	0.0739513	3	0.1044	0.095245	0.094154	0.097933	3
OG1RF_10161_161	RplN	50S ribosomal protein L14	Cytoplasmic	Protein synthesis	Ribosomal proteins: synthesis and modification	0.749859	0.078753	0.14672	0.1068	0.110758	3	0.099284	0.16722	0.17661	0.147705	3
OG1RF_10423_423	PrsA	Foldase protein PrsA (EC 5.2.1.8)	Cytoplasmic Membrane	cellular processes and signaling	Posttranslational modification, protein turnover, chaperones	0.74818	0.024972	0.024631	0.0087917	0.0194649	3	0.038142	0.029827	0.01008	0.0260163	3
OG1RF_12487_2487	RplM	50S ribosomal protein L13	Unknown	Protein synthesis	Ribosomal proteins: synthesis and modification	0.740377	0.094409	0.057304	0.040908	0.064207	3	0.050707	0.11565	0.093809	0.086722	3
OG1RF_10489_489	OG1RF_10489_489	WxL domain surface protein	Unknown	poorly characterized	General function prediction only	0.739867	0.095471	0.085606	0.089633	0.0902367	3	0.10984	0.14744	0.10861	0.121963	3
OG1RF_10710_710	Asp	Alkaline shock protein	Cytoplasmic	poorly characterized	Function unknown	0.736893	0.014931	0.02209		0.0185105	2	0.019547	0.031704	0.024108	0.0251197	3
OG1RF_10100_100	ArcB	Ornithine carbamoyltransferase, catabolic (OTCase) (EC 2.1.3.3)	Cytoplasmic	Energy metabolism	Amino acids and amines	0.732479	0.15121	0.1223	0.10505	0.126187	3	0.22172	0.14128	0.15382	0.172273	3
OG1RF_10176_176	RpsK	30S ribosomal protein S11	Cytoplasmic	Protein synthesis	Ribosomal proteins: synthesis and modification	0.730029	0.066204	0.057137	0.054386	0.0592423	3	0.086674	0.096648	0.06013	0.0811507	3
OG1RF_11852_1852	ThrC	Threonine synthase (EC 4.2.3.1)	Cytoplasmic	Amino acid biosynthesis	Aspartate family	0.724304	0.018249	0.023999	0.025699	0.022649	3	0.034509	0.032291	0.02701	0.03127	3
OG1RF_10156_156	RplV	50S ribosomal protein L22	Cytoplasmic	Protein synthesis	Ribosomal proteins: synthesis and modification	0.719564	0.06387	0.053998	0.034265	0.050711	3	0.079636	0.058124	0.073664	0.0704747	3
OG1RF_11146_1146	GldA	Glycerol dehydrogenase (EC 1.1.1.6)	Cytoplasmic	metabolism	Energy production and conversion	0.717305	0.019717	0.013891	0.010578	0.0147287	3	0.017209	0.023924	0.020467	0.0205333	3
OG1RF_10738_738	SirR	Iron-dependent repressor	Cytoplasmic	information storage and processing	Transcription	0.705641	0.0096175	0.0094861	0.0090293	0.00937763	3	0.016788	0.015316	0.0077646	0.0132895	3
OG1RF_10101_101	ArcC	Carbamate kinase	Cytoplasmic	Energy metabolism	Amino acids and amines	0.702669	0.034437	0.04076	0.032331	0.0358427	3	0.072135	0.04753	0.033363	0.0510093	3
OG1RF_11043_1043	InfB	Translation initiation factor IF-2	Cytoplasmic	Protein synthesis	Translation factors	0.701779	0.0040133	0.005278	0.0037679	0.00435307	3	0.0070056		0.0054002	0.0062029	2
OG1RF_10013_13	PurA	Adenylosuccinate synthetase (AMPSase) (AdSS) (EC 6.3.4.4) (IMP--aspartate ligase)	Cytoplasmic	Purines, pyrimidines, nucleosides, and nucleotides	Purine ribonucleotide biosynthesis	0.699986	0.013599	0.0067067	0.0063838	0.0088965	3	0.02176	0.0072192	0.0091494	0.0127095	3
OG1RF_10447_447	PtsH	PTS family porter, phosphocarrier protein HPR	Cytoplasmic	Signal transduction	PTS	0.699347	0.072787	0.10769	0.13667	0.105716	3	0.11647	0.18032	0.1567	0.151163	3
OG1RF_11831_1831	PyrH	Uridylate kinase (UK) (EC 2.7.4.22) (Uridine monophosphate kinase)	Cytoplasmic	Purines, pyrimidines, nucleosides, and nucleotides	Nucleotide and nucleoside interconversions	0.696291	0.022148	0.026215	0.020794	0.0230523	3	0.027063	0.032921	0.039338	0.0331073	3
OG1RF_11697_1697	OG1RF_11697_1697	Uncharacterized protein	Unknown	poorly characterized	Function unknown	0.689847	0.030344	0.024487	0.023308	0.0260463	3	0.033706	0.043931	0.035633	0.0377567	3
OG1RF_10163_163	RplE	50S ribosomal protein L5	Cytoplasmic	Protein synthesis	Ribosomal proteins: synthesis and modification	0.68327	0.11331	0.14706	0.089587	0.116652	3	0.17698	0.13297	0.20223	0.170727	3
OG1RF_12500_2500	OG1RF_12500_2500	Cell-envelope associated acid phosphatase	Cytoplasmic Membrane	Regulatory functions	Other	0.680165	0.0059528	0.0058715	0.0055888	0.00580437	3	0.0086593	0.010534	0.006408	0.00853377	3
OG1RF_10230_230	Efp	Elongation factor P (EF-P)	Cytoplasmic	Protein synthesis	Translation factors	0.675363	0.045916	0.011322	0.026942	0.02806	3	0.020037	0.030468	0.074139	0.041548	3
OG1RF_12331_2331	OG1RF_12331_2331	Secreted lipase	Extracellular	poorly characterized	Function unknown	0.67104	0.54282	0.5644	0.72196	0.609727	3	0.91003	0.94851	0.86735	0.90863	3
OG1RF_11432_1432	PyrR	Bifunctional protein pyrR	Cytoplasmic	metabolism	Nucleotide transport and metabolism	0.655764	0.011995		0.011261	0.011628	2	0.020938		0.014526	0.017732	2
OG1RF_10735_735	DivIVA	Cell division protein DivIVA	Cytoplasmic	Cellular processes	Cell division	0.654	0.032072	0.022596	0.017206	0.023958	3	0.055985	0.024322	0.029592	0.036633	3
OG1RF_11427_1427	CarB	Carbamoyl-phosphate synthase (glutamine-hydrolyzing) (EC 6.3.5.5)	Cytoplasmic	Purines, pyrimidines, nucleosides, and nucleotides	Pyrimidine ribonucleotide biosynthesis	0.653106	0.0020029	0.0069144	0.0065814	0.00516623	3	0.0061184		0.0097021	0.00791025	2
OG1RF_11423_1423	PyrE	Orotate phosphoribosyltransferase (OPRT) (OPRTase) (EC 2.4.2.10)	Cytoplasmic	Purines, pyrimidines, nucleosides, and nucleotides	Pyrimidine ribonucleotide biosynthesis	0.652629	0.018979	0.0093596	0.0089089	0.0124158	3	0.016564	0.025187	0.015322	0.0190243	3
OG1RF_10071_71	OG1RF_10071_71	Stress response regulator Gls24	Cytoplasmic	poorly characterized	Function unknown	0.640054	0.037678	0.037163	0.023582	0.0328077	3	0.054808	0.053337	0.045628	0.0512577	3
OG1RF_10729_729	FtsA	Cell division protein ftsA	Cytoplasmic	Cellular processes	Cell division	0.634586	0.0048525	0.0095724	0.0045557	0.00632687	3	0.0084704	0.0077278	0.013712	0.00997007	3
OG1RF_11357_1357	CodY	GTP-sensing transcriptional pleiotropic repressor CodY	Cytoplasmic	Regulatory functions	DNA interactions	0.633432	0.016424	0.016199		0.0163115	2	0.032253	0.021796	0.023204	0.025751	3
OG1RF_11135_1135	OG1RF_11135_1135	Sugar ABC superfamily ATP binding cassette transporter, sugar-binding protein	Unknown	metabolism	Carbohydrate transport and metabolism	0.62027	0.13858	0.12403	0.11805	0.126887	3	0.24861	0.1662	0.19889	0.204567	3
OG1RF_10486_486	OG1RF_10486_486	WxL domain surface protein	Unknown	poorly characterized	General function prediction only	0.617445	0.08347	0.051998	0.065992	0.0671533	3	0.11503	0.11194	0.09931	0.10876	3
OG1RF_10301_301	OG1RF_10301_301	Efflux transporter	Unknown	Cell envelope	Biosynthesis and degradation of surface polysaccharides and lipopolysaccharides	0.612209	0.0054467	0.010744	0.0051135	0.0071014	3	0.016638	0.011565	0.0065959	0.0115996	3
OG1RF_11148_1148	DhaK	Dihydroxyacetone kinase (EC 2.7.1.-)	Cytoplasmic	metabolism	Carbohydrate transport and metabolism	0.604218	0.016323	0.0064401	0.00613	0.00963103	3	0.019946	0.01733	0.010543	0.0159397	3
OG1RF_10227_227	FabZ	3-hydroxyacyl-[acyl-carrier-protein] dehydratase FabZ (EC 4.2.1.59) ((3R)-hydroxymyristoyl-[acyl-carrier-protein] dehydratase) (Beta-hydroxyacyl-ACP dehydratase)	Cytoplasmic	Fatty acid and phospholipid metabolism	Biosynthesis	0.600156	0.074135	0.058498	0.069601	0.0674113	3	0.084116	0.18103	0.071823	0.112323	3
OG1RF_11833_1833	RpsB	30S ribosomal protein S2	Cytoplasmic	Protein synthesis	Ribosomal proteins: synthesis and modification	0.599404	0.089985	0.060515	0.061441	0.070647	3	0.14994	0.078166	0.12548	0.117862	3
OG1RF_11151_1151	OG1RF_11151_1151	Hydroxymethylglutaryl-CoA synthase (EC 2.3.3.10)	Cytoplasmic	metabolism	Lipid transport and metabolism	0.596823	0.0072953	0.0071956	0.0091322	0.00787437	3	0.021224	0.0051636		0.0131938	2
OG1RF_10367_367	OG1RF_10367_367	Decarboxylase	Cytoplasmic	Cellular processes	Adaptations to atypical conditions	0.586888	0.044768	0.039061	0.035564	0.0397977	3	0.072135	0.054843	0.076456	0.0678113	3
OG1RF_12340_2340	RpsD	30S ribosomal protein S4	Cytoplasmic	Protein synthesis	Ribosomal proteins: synthesis and modification	0.586073	0.068365	0.031122	0.054309	0.0512653	3	0.11475	0.067	0.080668	0.0874727	3
OG1RF_10225_225	FabI	Enoyl-[acyl-carrier-protein] reductase [NADH] (EC 1.3.1.9)	Cytoplasmic Membrane	Fatty acid and phospholipid metabolism	Biosynthesis	0.58277	0.068323	0.067389	0.060135	0.0652823	3	0.13417	0.10881	0.093082	0.112021	3
OG1RF_10703_703	RplU	50S ribosomal protein L21	Unknown	Protein synthesis	Ribosomal proteins: synthesis and modification	0.580676	0.24072	0.5368	0.91382	0.56378	3	0.29231	1.5557	1.0647	0.970903	3
OG1RF_11359_1359	HslV	ATP-dependent protease subunit HslV (EC 3.4.25.2)	Cytoplasmic	Protein fate	Degradation of proteins, peptides, and glycopeptides	0.579631	0.016508	0.016283	0.010333	0.0143747	3	0.028817	0.023369	0.022213	0.0247997	3
OG1RF_12499_2499	OG1RF_12499_2499	Chitin binding protein	Unknown	poorly characterized	Function unknown	0.568295	0.02749	0.027115	0.043015	0.03254	3	0.047987	0.053509	0.070281	0.057259	3
OG1RF_11395_1395	OG1RF_11395_1395	Uncharacterized protein	Unknown	poorly characterized	Function unknown	0.539519	0.0098391	0.0097047	0.0092374	0.00959373	3	0.025762	0.015669	0.011915	0.017782	3
OG1RF_12082_2082	RplA	50S ribosomal protein L1	Cytoplasmic	Protein synthesis	Ribosomal proteins: synthesis and modification	0.53386	0.069926	0.073569	0.087533	0.0770093	3	0.15868	0.13858	0.13549	0.14425	3
OG1RF_10488_488	OG1RF_10488_488	WxL domain surface protein	Unknown	Cell envelope	Surface structures	0.529236	0.006109	0.0060255	0.0028677	0.00500073	3	0.011997	0.0064859	0.009864	0.00944897	3
OG1RF_12010_2010	Rex	Redox-sensing transcriptional repressor Rex	Unknown	poorly characterized	General function prediction only	0.520451	0.024712	0.024374	0.0232	0.0240953	3	0.051764	0.047226	0.039901	0.046297	3
OG1RF_11149_1149	OG1RF_11149_1149	Dihydroxyacetone kinase (EC 2.7.1.-)	Unknown	metabolism	Carbohydrate transport and metabolism	0.519877	0.021351	0.021059	0.025056	0.0224887	3	0.03727	0.062338	0.030165	0.0432577	3
OG1RF_11564_1564	RplS	50S ribosomal protein L19	Cytoplasmic	Protein synthesis	Ribosomal proteins: synthesis and modification	0.519134	0.10211	0.18312	0.26146	0.18223	3	0.25927	0.40409	0.38972	0.351027	3
OG1RF_10157_157	RpsC	30S ribosomal protein S3	Cytoplasmic	Protein synthesis	Ribosomal proteins: synthesis and modification	0.506303	0.09794	0.053131	0.087352	0.0794743	3	0.15387	0.13518	0.18186	0.15697	3
OG1RF_11465_1465	PhoU	Phosphate-specific transport system accessory protein PhoU	Cytoplasmic	Regulatory functions	Other	0.475232		0.014039	0.017818	0.0159285	2	0.03727	0.040299	0.022983	0.0335173	3
OG1RF_12392_2392	OG1RF_12392_2392	Serine-type D-Ala-D-Ala carboxypeptidase (EC 3.4.16.4)	Cytoplasmic Membrane	Cell envelope	Biosynthesis and degradation of surface polysaccharides and lipopolysaccharides	0.462819	0.058466	0.061939	0.050824	0.0570763	3	0.16632	0.10575	0.0979	0.123323	3
OG1RF_10168_168	RpsE	30S ribosomal protein S5	Cytoplasmic	Protein synthesis	Ribosomal proteins: synthesis and modification	0.435251	0.22508	0.2347	0.22339	0.227723	3	0.48832	0.52574	0.55554	0.5232	3
OG1RF_10444_444	ClpE	ATP-dependent Clp protease	Cytoplasmic	Protein fate	Degradation of proteins, peptides, and glycopeptides	0.424715	0.002862	0.0028229	0.002687	0.00279063	3	0.0074939	0.0075966	0.0046213	0.0065706	3
OG1RF_10208_208	Hpt	Hypoxanthine phosphoribosyltransferase (EC 2.4.2.8)	Cytoplasmic	Purines, pyrimidines, nucleosides, and nucleotides	Salvage of nucleosides and nucleotides	0.420726	0.041286		0.011075	0.0261805	2	0.066921	0.062619	0.057141	0.062227	3
OG1RF_12184_2184	FabG3	3-oxoacyl-[acyl-carrier-protein] reductase (EC 1.1.1.100)	Cytoplasmic	Fatty acid and phospholipid metabolism	Biosynthesis	0.415343		0.0085956	0.0081817	0.00838865	2	0.030424	0.023131	0.0070357	0.0201969	3
OG1RF_10366_366	TyrS	Tyrosine--tRNA ligase (EC 6.1.1.1) (Tyrosyl-tRNA synthetase)	Cytoplasmic	Protein synthesis	tRNA aminoacylation	0.397325	0.035332	0.03236	0.021325	0.0296723	3	0.083703	0.066987	0.073351	0.0746803	3
OG1RF_10102_102	NtcA	Global nitrogen regulator NtcA	Unknown	cellular processes and signaling	Signal transduction mechanisms	0.350453	0.009283	0.0091562		0.0092196	3	0.024306	0.024639	0.029978	0.0263077	3
OG1RF_10925_925	Pbp1A	Penicillin-binding protein 1A	Extracellular	Cell envelope	Biosynthesis and degradation of murein sacculus and peptidoglycan	0.331007	0.0041165	0.0054137	0.0077295	0.00575323	3	0.014371	0.018939	0.018833	0.017381	3
OG1RF_11473_1473	FtsE	ABC superfamily ATP binding cassette transporter, ABC protein	Cytoplasmic Membrane	Cellular processes	Cell division	0.329085	0.014047		0.0087917	0.0114193	2	0.032693	0.029827	0.041581	0.0347003	3
OG1RF_11130_1130	OG1RF_11130_1130	Pheromone cAM373 lipoprotein	Unknown	poorly characterized	Function unknown	0.322321	0.012131	0.017948	0.017084	0.015721	3	0.047646	0.064398	0.034279	0.0487743	3
OG1RF_10328_328	OG1RF_10328_328	Peptidoglycan binding protein	Unknown	poorly characterized	Function unknown	0.304966	0.40771	0.31218	0.66481	0.461567	3	1.517	1.6289	1.3946	1.5135	3
OG1RF_11509_1509	OG1RF_11509_1509	Uncharacterized protein	Unknown	poorly characterized	Function unknown	0.231887	0.0032252	0.0039764	0.003785	0.0036622	3	0.024631	0.0025682	0.02018	0.0157931	3
OG1RF_11718_1718	OG1RF_11718_1718	Uncharacterized protein	Unknown	Cell envelope	Biosynthesis and degradation of surface polysaccharides and lipopolysaccharides	0.0679319	0.019576	0.025745	0.041659	0.0289933	3	0.44993	0.41429	0.41618	0.4268	3
