# Supplementary material for: Detailed Soluble Proteome Analyses of a Dairy-Isolated Enterococcus faecalis: A Possible Approach to Assess Food Safety and Potential Probiotic Value
Source: Front Nutr. 2019 May 17;6:71. doi: 10.3389/fnut.2019.00071 (PMC6533484; doi:10.3389/fnut.2019.00071)
Supplement: Table S4 — The table includes the secreted proteins identified in at least two of the three biological replicates of E. faecalis D27 and E. faecalis UW3114 and the proteins found only in one of E. faecalis strain and absent (off) in the other strain. The fold-change is given by the ratio between the average of the abundance [normalized spectral abundance factor (NSAF)] in E. faecalis D27 and the average of the abundance (NSAF) in E. faecalis UW3114. Accession, protein name, description, localization (obtained by pSortb), main role and subrole are reported to give information on the protein function. For each protein, the abundance (NSAF) for all the biological replicates are reported for both E. faecalis D27 and E. faecalis UW3114. [file Table_4.XLSX]

## Sheet: Table S4
a Fold-change is given by the ratio between the average of the protein abundance (fmol/ng) in E. faecalis D27 and the average of the protein abundance (fmol/ng) in E. faecalis UW3114.
b Protein abundance based on the normalized spectrum abundance factors (NSAF) for each of the three technical replicates (D27_1, D27_2 and D27_3) of E. faecalis D27
c Average of the protein amount for the three techinical replicates of E. faecalis D27
d Number of technical replicates of E. faecalis D27 in which the protein was identified and quantified
e Protein abundance based on the normalized spectrum abundance factors (NSAF) for each of the three technical replicates (UW3114_1, UW3114_2 and UW3114_3) of E. faecalis UW3114
f Average of the protein amount for the three techinical replicates of E. faecalis UW3114
g Number of technical replicates of E. faecalis UW3114 in which the protein was identified and quantified
						QUANTITATIVE RESULTS
PROTEIN DESCRIPTION						Fold-change a D27/UW3114	NSAF b			Average D27 c	Repcount D27 d	NSAF e			Average UW3114 f	Repcount UW3114 g
accession	protein	description	localization pSortb	main role (COG)	subrole (COG)		D27_1	D27_2	D27_3			UW3114_1	UW3114_2	UW3114_3
OG1RF_11526_1526	GelE	gelatinase	Extracellular	metabolism	General function prediction only	0.220606	0.006292	0.010343	0.0098453	0.00882677	3	0.029383	0.05064		0.0400115	2
OG1RF_10250_250	ChiC	chitinase C1	Extracellular	metabolism	Translation factors	0.23588	0.03988	0.04236	0.046081	0.0427737	3	0.20295	0.19258	0.14848	0.181337	3
OG1RF_12500_2500	OG1RF_12500	cell-envelope associated acid phosphatase	Cytoplasmic Membrane	Regulatory functions	Pentose phosphate pathway	0.250231	0.0059528	0.0058715	0.0055888	0.00580437	3	0.021622	0.023955	0.024011	0.023196	3
OG1RF_11509_1509	OG1RF_11509	hypothetical protein OG1RF_11509	Unknown	poorly characterized	Function unknown	0.343802	0.0032252	0.0039764	0.003785	0.0036622	3	0.015061	0.0071383	0.0097569	0.0106521	3
OG1RF_11269_1269	Hup	DNA-binding protein HU	Cytoplasmic	DNA metabolism	Function unknown	0.347706	0.10558	0.069426	0.08811	0.0877053		0.22827	0.28325	0.2452	0.25224
OG1RF_10162_162	RplX	50S ribosomal protein L24	Cytoplasmic	Protein synthesis	Carbohydrate transport and metabolism	0.419548	0.031094	0.030669		0.0308815		0.088736	0.075075	0.057009	0.0736067
OG1RF_12225_2225	CspA3	cold shock protein CspA	Cytoplasmic	information storage and processing	Degradation of RNA	0.461232	0.0647	0.15954	0.12149	0.115243		0.37768	0.24734	0.12456	0.24986
OG1RF_10251_251	OG1RF_10251	chitin-binding protein/carbohydrate-binding protein	Extracellular	poorly characterized	Translation factors	0.492853	0.35218	0.74358	0.28931	0.46169	3	0.97651	0.85919	0.97461	0.93677	3
OG1RF_10206_206	OG1RF_10206	S1 RNA-binding domain protein	Cytoplasmic	information storage and processing	Carbohydrate transport and metabolism	0.546843	0.026856	0.013245	0.012607	0.0175693	3	0.041806	0.032422	0.022158	0.0321287
OG1RF_10144_144	RpsL	30S ribosomal protein S12	Cytoplasmic	Protein synthesis	Carbohydrate transport and metabolism	0.556266	0.038961	0.030743	0.021947	0.0305503		0.054584	0.050172	0.060005	0.0549203
OG1RF_10153_153	RplW	50S ribosomal protein L23	Unknown	Protein synthesis	Carbohydrate transport and metabolism	0.583401	0.088962	0.043873	0.03132	0.0547183	3	0.10386	0.11635	0.061166	0.093792	3
OG1RF_12184_2184	FabG3	3-oxoacyl-[acyl-carrier-protein] reductase	Cytoplasmic	Fatty acid and phospholipid metabolism	General	0.600347		0.0085956	0.0081817	0.00838865	3	0.013566		0.01438	0.013973
OG1RF_10175_175	RpsM	30S ribosomal protein S13	Cytoplasmic	Protein synthesis	Carbohydrate transport and metabolism	0.668402	0.052936	0.034809	0.057982	0.0485757		0.048068	0.09231	0.077645	0.0726743
OG1RF_11833_1833	RpsB	30S ribosomal protein S2	Cytoplasmic	Protein synthesis	Other	0.722158	0.089985	0.060515	0.061441	0.070647		0.11461	0.088882	0.089991	0.0978277
OG1RF_12214_2214	GreA	transcription elongation factor GreA	Cytoplasmic	Transcription	Function unknown	0.760563	0.034071	0.033605	0.042649	0.036775		0.061875	0.045702	0.03748	0.0483523
OG1RF_11732_1732	RmlB	dTDP glucose 4,6-dehydratase	Cytoplasmic	Cell envelope	Biosynthesis and degradation of surface polysaccharides and lipopolysaccharides	0.787529	0.0093644	0.0061577		0.00776105		0.004859	0.0075368	0.017169	0.00985493
OG1RF_11149_1149	OG1RF_11149	dihydroxyacetone kinase	Unknown	metabolism	Carbohydrate transport and metabolism	0.836622	0.021351	0.021059	0.025056	0.0224887	3	0.041545	0.02148	0.017616	0.0268803	3
OG1RF_11397_1397	OG1RF_11397	DegV family protein	Cytoplasmic	poorly characterized	General	0.872309	0.0076253	0.015042		0.0113337	3	0.01187	0.0061371	0.020971	0.0129927
OG1RF_10729_729	FtsA	cell division protein FtsA	Cytoplasmic	Cellular processes	Cell division	0.88617	0.0048525	0.0095724	0.0045557	0.00632687		0.0075535	0.0058581	0.0080071	0.00713957
OG1RF_10170_170	RplO	50S ribosomal protein L15	Unknown	Protein synthesis	Carbohydrate transport and metabolism	0.888116	0.058496	0.064908	0.048053	0.0571523	3	0.068292	0.076503	0.048262	0.0643523	3
OG1RF_12007_2007	GroES	chaperone GroES	Cytoplasmic	Protein fate	Signal transduction mechanisms	0.947565	0.0647	0.031908	0.050619	0.0490757	3	0.050357	0.06943	0.035587	0.0517913
OG1RF_10161_161	RplN	50S ribosomal protein L14	Cytoplasmic	Protein synthesis	Carbohydrate transport and metabolism	0.950438	0.078753	0.14672	0.1068	0.110758		0.10216	0.11268	0.13476	0.116533
OG1RF_10444_444	ClpE	ATP-dependent Clp protease	Cytoplasmic	Protein fate	Translation factors	0.952066	0.002862	0.0028229	0.002687	0.00279063		0.0033414	0.0023035	0.0031485	0.00293113
OG1RF_10178_178	RplQ	50S ribosomal protein L17	Cytoplasmic	Protein synthesis	Carbohydrate transport and metabolism	0.957019	0.075653	0.041455	0.063134	0.0600807		0.071967	0.060888	0.055482	0.062779
OG1RF_12538_2538	GuaB	IMP dehydrogenase	Cytoplasmic	Purines, pyrimidines, nucleosides, and nucleotides	Pentose phosphate pathway	0.957398		0.0084745	0.0040332	0.00625385		0.0066872	0.0034575	0.0094517	0.00653213
OG1RF_10145_145	RpsG	30S ribosomal protein S7	Cytoplasmic	Protein synthesis	Carbohydrate transport and metabolism	0.964733	0.088962	0.053998	0.096371	0.079777		0.1012	0.071599	0.075281	0.0826933
OG1RF_12350_2350	OG1RF_12350	oligopeptide ABC superfamily ATP binding cassette transporter, binding protein	Cellwall	metabolism	Pentose phosphate pathway	0.981447	0.01171	0.013475	0.0054968	0.0102273	3	0.009114	0.015707	0.0064408	0.0104206	3
OG1RF_12439_2439	RecA	recombination protein A	Cytoplasmic	DNA metabolism	Pentose phosphate pathway	0.990937	0.030677	0.033283	0.01728	0.02708	3	0.026264	0.032096	0.023623	0.0273277
OG1RF_11907_1907	OG1RF_11907	penicillin-binding protein 4	Cytoplasmic Membrane	Cell envelope	Biosynthesis and degradation of surface polysaccharides and lipopolysaccharides	0.998668	0.0047098	0.0092908	0.0073695	0.00712337	3	0.0061095	0.010108	0.0051811	0.00713287	3
OG1RF_10878_878	OG1RF_10878	collagen adhesin protein	Cellwall	Cell envelope	Other	1.0016	0.052268	0.045305	0.049072	0.0488817	3	0.049311	0.05354	0.04356	0.0488037	3
OG1RF_11453_1453	CcpA	catabolite control protein A	Cytoplasmic	Regulatory functions	General function prediction only	1.01754	0.051293	0.053755	0.030098	0.0450487		0.037427	0.028382	0.067007	0.044272
OG1RF_10168_168	RpsE	30S ribosomal protein S5	Cytoplasmic	Protein synthesis	Carbohydrate transport and metabolism	1.03315	0.22508	0.2347	0.22339	0.227723		0.22024	0.18633	0.25468	0.220417
OG1RF_10163_163	RplE	50S ribosomal protein L5	Cytoplasmic	Protein synthesis	Carbohydrate transport and metabolism	1.03348	0.11331	0.14706	0.089587	0.116652		0.1114	0.095999	0.13122	0.112873
OG1RF_12486_2486	RpsI3	30S ribosomal protein S9	Cytoplasmic	Protein synthesis	Pentose phosphate pathway	1.0464	0.065695	0.080997	0.084806	0.077166		0.08948	0.059483	0.072269	0.073744
OG1RF_10735_735	DivIVA	cell division protein DivIVA	Cytoplasmic	Cellular processes	Function unknown	1.04965	0.032072	0.022596	0.017206	0.023958		0.01783	0.040563	0.010081	0.0228247
OG1RF_10156_156	RplV	50S ribosomal protein L22	Cytoplasmic	Protein synthesis	Carbohydrate transport and metabolism	1.08062	0.06387	0.053998	0.034265	0.050711		0.063915	0.036718	0.04015	0.0469277
OG1RF_11267_1267	RpsA	30S ribosomal protein S1	Cytoplasmic	Protein synthesis	Function unknown	1.08619	0.034437	0.028741	0.019896	0.0276913		0.026803	0.023452	0.026227	0.025494
OG1RF_10172_172	Adk	adenylate kinase	Cytoplasmic	Purines, pyrimidines, nucleosides, and nucleotides	Carbohydrate transport and metabolism	1.09432	0.027728	0.0091165		0.0122815		0.0071939		0.015252	0.0112229
OG1RF_10150_150	RpsJ	30S ribosomal protein S10	Cytoplasmic	Protein synthesis	Carbohydrate transport and metabolism	1.12954	0.10301	0.073892	0.1055	0.094134		0.087462	0.090441	0.072111	0.083338
OG1RF_10230_230	Efp	elongation factor P	Cytoplasmic	Protein synthesis	Translation factors	1.13516	0.045916	0.011322	0.026942	0.02806		0.017869		0.031569	0.024719
OG1RF_12082_2082	RplA	50S ribosomal protein L1	Cytoplasmic	Protein synthesis	Function unknown	1.13653	0.069926	0.073569	0.087533	0.0770093		0.094337	0.052527	0.056411	0.0677583
OG1RF_12199_2199	Tig3	peptidylprolyl isomerase	Cytoplasmic	Protein fate	Energy production and conversion	1.14419	0.027233	0.021489	0.010227	0.0196497		0.021196	0.013151		0.0171735
OG1RF_12487_2487	RplM	50S ribosomal protein L13	Unknown	Protein synthesis	Pentose phosphate pathway	1.15208	0.094409	0.057304	0.040908	0.064207	3	0.056523	0.046759	0.063912	0.0557313	3
OG1RF_10176_176	RpsK	30S ribosomal protein S11	Cytoplasmic	Protein synthesis	Carbohydrate transport and metabolism	1.16334	0.066204	0.057137	0.054386	0.0592423	3	0.051528	0.046623	0.054622	0.0509243
OG1RF_10225_225	FabI	enoyl-[acyl-carrier-protein] reductase (NADH)	Cytoplasmic Membrane	Fatty acid and phospholipid metabolism	Carbohydrate transport and metabolism	1.16355	0.068323	0.067389	0.060135	0.0652823	3	0.053177	0.044678	0.070463	0.056106	3
OG1RF_10154_154	RplB	50S ribosomal protein L2	Unknown	Protein synthesis	Carbohydrate transport and metabolism	1.16678	0.1083	0.10682	0.1162	0.11044	3	0.096335	0.068486	0.11914	0.0946537	3
OG1RF_10208_208	Hpt	hypoxanthine phosphoribosyltransferase	Cytoplasmic	Purines, pyrimidines, nucleosides, and nucleotides	Carbohydrate transport and metabolism	1.17328	0.041286		0.011075	0.0174537		0.0091811	0.0094938	0.025953	0.014876
OG1RF_10766_766	OG1RF_10766	amidase	Cytoplasmic Membrane	Cell envelope	Other	1.17785	0.06408	0.052446	0.062721	0.059749	3	0.042446	0.064741	0.044995	0.0507273	3
OG1RF_11473_1473	FtsE	ABC superfamily ATP binding cassette transporter, ABC protein	Cytoplasmic Membrane	Cellular processes	Function unknown	1.19068	0.014047		0.0087917	0.0114193	2	0.010933	0.0075368	0.010302	0.0095906	3
OG1RF_10925_925	Pbp1A	penicillin-binding protein 1A	Extracellular	Cell envelope	Function unknown	1.19901	0.0041165	0.0054137	0.0077295	0.00575323	3	0.002136	0.0077305	0.0045285	0.00479833	3
OG1RF_10197_197	AmiD	N-acetylmuramoyl-L-alanine amidase	Cytoplasmic Membrane	Cell envelope	Carbohydrate transport and metabolism	1.21351	0.24832	0.25958	0.34471	0.284203	3	0.20318	0.357	0.14242	0.2342	3
OG1RF_11455_1455	OG1RF_11455	general stress protein	Unknown	poorly characterized	General function prediction only	1.22235	0.010675	0.01053	0.015034	0.0120797	3	0.012463	0.017184		0.00988233	2
OG1RF_10705_705	RpmA	50S ribosomal protein L27	Cytoplasmic	Protein synthesis	Translation, ribosomal structure and biogenesis	1.23086	0.033712	0.077586	0.05275	0.0546827		0.06997	0.063309	0	0.0444263
OG1RF_11831_1831	PyrH	UMP kinase	Cytoplasmic	Purines, pyrimidines, nucleosides, and nucleotides	Other	1.24057	0.022148	0.026215	0.020794	0.0230523		0.020686	0.010695	0.024365	0.018582
OG1RF_12431_2431	Prs1	phosphoribosyl pyrophosphate synthetase	Cytoplasmic	Purines, pyrimidines, nucleosides, and nucleotides	Pentose phosphate pathway	1.24771	0.039661	0.02282	0.024824	0.0291017		0.01029		0.036358	0.023324
OG1RF_10447_447	PtsH	PTS family porter, phosphocarrier protein HPR	Cytoplasmic	Signal transduction	Translation factors	1.2736	0.072787	0.10769	0.13667	0.105716		0.094419	0.087872	0.066726	0.0830057
OG1RF_10210_210	HslO	chaperonin HslO	Cytoplasmic	cellular processes and signaling	Carbohydrate transport and metabolism	1.27533	0.010747	0.0106	0.0067265	0.00935783		0.0083647	0.0057664	0.0078817	0.0073376
OG1RF_12511_2511	OG1RF_12511	secreted protein	Unknown	poorly characterized	Pentose phosphate pathway	1.28564	0.030501	0.015042	0.028636	0.0247263	3	0.01187	0.012274	0.033554	0.0192327	3
OG1RF_10533_533	Lyzl6	cell wall lysis protein	Extracellular	Cellular processes	Function unknown	1.28851	0.16803	0.17145	0.18631	0.175263	3	0.12063	0.15039	0.13704	0.13602	3
OG1RF_11938_1938	OG1RF_11938	fumarate reductase	Unknown	Energy metabolism	Electron transport	1.29858	0.33823	0.31276	0.28182	0.310937	3	0.22212	0.21948	0.27673	0.239443	3
OG1RF_11130_1130	OG1RF_11130	pheromone cAM373 lipoprotein	Unknown	poorly characterized	Function unknown	1.30536	0.012131	0.017948	0.017084	0.015721	3	0.0094419	0.014645		0.0120435	2
OG1RF_10676_676	Pta	phosphate acetyltransferase	Cytoplasmic	Energy metabolism	Function unknown	1.31573	0.10018	0.095724	0.11169	0.102531		0.087719	0.080628	0.065435	0.0779273
OG1RF_11564_1564	RplS	50S ribosomal protein L19	Cytoplasmic	Protein synthesis	Carbohydrate transport and metabolism	1.32377	0.10211	0.18312	0.26146	0.18223		0.13005	0.11954	0.16339	0.13766
OG1RF_11141_1141	PdhA	pyruvate dehydrogenase complex E1 component alpha subunit	Cytoplasmic	Energy metabolism	Function unknown	1.33765	0.14963	0.14475	0.13507	0.14315		0.14781	0.097267	0.075971	0.107016
OG1RF_10948_948	RpmE	50S ribosomal protein L31	Cytoplasmic	Protein synthesis	Function unknown	1.35167	0.043133	0.063816	0.040495	0.049148		0.041964	0.043394	0.023725	0.036361
OG1RF_12340_2340	RpsD	30S ribosomal protein S4	Cytoplasmic	Protein synthesis	Pentose phosphate pathway	1.35557	0.068365	0.031122	0.054309	0.0512653		0.049117	0.029627	0.034711	0.0378183
OG1RF_10166_166	RplF	50S ribosomal protein L6	Unknown	Protein synthesis	Carbohydrate transport and metabolism	1.36744	0.12595	0.1538	0.20833	0.162693	3	0.1307	0.12067	0.10556	0.118977	3
OG1RF_12366_2366	OG1RF_12366	peptide ABC superfamily ATP binding cassette transporter, binding protein	Unknown	metabolism	Pentose phosphate pathway	1.41466	0.048689	0.03913	0.025395	0.037738	3	0.019649	0.024673	0.035707	0.0266763	3
OG1RF_11143_1143	AceF	pyruvate dehydrogenase complex E2, dihydrolipoamide acetyltransferase	Cytoplasmic	metabolism	Function unknown	1.41611	0.14062	0.13675	0.14318	0.140183		0.10945	0.12434	0.063186	0.098992
OG1RF_12167_2167	EndOF3	Mannosyl-glycoprotein endo-beta-N-acetylglucosaminidase	Cytoplasmic Membrane	metabolism	Function unknown	1.43511	0.64257	1.0798	0.81393	0.845433	3	0.37311	0.7771	0.61711	0.589107	3
OG1RF_10071_71	OG1RF_10071	stress response regulator Gls24	Cytoplasmic	poorly characterized	Carbohydrate transport and metabolism	1.45289	0.037678	0.037163	0.023582	0.0328077		0.024438		0.020724	0.022581
OG1RF_11979_1979	OG1RF_11979	FMN-dependent NADH-azoreductase	Cytoplasmic	metabolism	Lipid transport and metabolism	1.49261	0.051324	0.045561	0.028911	0.041932		0.019973	0.024784	0.039522	0.028093
OG1RF_12010_2010	OG1RF_12010	CoA-binding domain protein	Unknown	poorly characterized	General function prediction only	1.52031	0.024712	0.024374	0.0232	0.0240953	3	0.015387		0.016311	0.015849	2
OG1RF_10576_576	SrmB	ATP-dependent RNA helicase DeaD	Cytoplasmic	DNA metabolism	Function unknown	1.52381	0.033859	0.019645	0.024308	0.0259373		0.0077508		0.026292	0.0170214
OG1RF_10954_954	LuxS	S-ribosylhomocysteine lyase	Cytoplasmic	cellular processes and signaling	Energy production and conversion	1.53247	0.04214	0.048492	0.072532	0.054388		0.016399	0.028263	0.061809	0.0354903
OG1RF_11303_1303	SrpG2	cysteine synthase	Cytoplasmic	Amino acid biosynthesis	Carbohydrate transport and metabolism	1.53955	0.010331	0.016983		0.013657		0.010721	0.0083148	0.0075766	0.0088708
OG1RF_10151_151	RplC	50S ribosomal protein L3	Cytoplasmic	Protein synthesis	Carbohydrate transport and metabolism	1.56432	0.11237	0.075571	0.1103	0.0994137		0.079511	0.049332	0.061809	0.0635507
OG1RF_10452_452	Tig	trigger factor	Cytoplasmic	Protein fate	Translation factors	1.60628	0.056575	0.060654	0.050806	0.0560117		0.032546	0.039594	0.032471	0.0348703
OG1RF_10462_462	GatA	glutamyl-tRNA(Gln) amidotransferase subunit A	Cytoplasmic	Protein synthesis	Translation factors	1.62318	0.026197	0.021533	0.018446	0.0220587		0.013593	0.01757	0.0096064	0.0135898
OG1RF_10157_157	RpsC	30S ribosomal protein S3	Cytoplasmic	Protein synthesis	Carbohydrate transport and metabolism	1.62586	0.09794	0.053131	0.087352	0.0794743		0.05336	0.039413	0.053871	0.0488813
OG1RF_12392_2392	OG1RF_12392	serine-type D-Ala-D-Ala carboxypeptidase	Cytoplasmic Membrane	Cell envelope	Pentose phosphate pathway	1.6281	0.058466	0.061939	0.050824	0.0570763	3	0.048876	0.034856	0.021439	0.035057	3
OG1RF_11832_1832	Tsf	elongation factor EF1B	Cytoplasmic	Protein synthesis	Other	1.63284	0.20768	0.1725	0.12999	0.170057		0.085074	0.12316	0.10421	0.104148
OG1RF_10011_11	RplI	50S ribosomal protein L9	Cytoplasmic	Protein synthesis	Carbohydrate transport and metabolism	1.64083	0.020932	0.020646	0.013101	0.0182263		0.010861	0.022463		0.011108
OG1RF_12336_2336	Def	peptide deformylase	Unknown	Protein fate	Pentose phosphate pathway	1.64999	0.017126	0.016892	0.010719	0.0149123	3	0.0088865	0.0091892		0.00903785	2
OG1RF_10779_779	Pyk	pyruvate kinase	Cytoplasmic	Energy metabolism	Function unknown	1.65221	0.11862	0.1188	0.14905	0.128823		0.080959	0.064623	0.088329	0.0779703
OG1RF_10038_38	Dut	dUTP diphosphatase	Cytoplasmic	metabolism	Carbohydrate transport and metabolism	1.65753	0.039784	0.032701	0.01245	0.0283117		0.020643	0.01601	0.014589	0.0170807
OG1RF_10125_125	OG1RF_10125	ABC superfamily ATP binding cassette transporter, binding protein	Unknown	poorly characterized	Carbohydrate transport and metabolism	1.66612	0.1765	0.18532	0.23252	0.198113	3	0.13737	0.11914	0.10021	0.118907	3
OG1RF_11876_1876	PanE2	2-dehydropantoate 2-reductase	Cytoplasmic	Biosynthesis of cofactors, prosthetic groups, and carriers	Lipid transport and metabolism	1.66629	0.017053	0.010092	0.038425	0.0218567		0.010618	0.013725	0.015008	0.013117
OG1RF_10354_354	OG1RF_10354	hypothetical protein	Unknown	poorly characterized	Translation factors	1.66947	0.024943	0.0098407	0.016392	0.0170586	3	0.011648	0.0080298	0.010976	0.0102179	3
OG1RF_10072_72	OG1RF_10072	stress response regulator Gls24	Cytoplasmic	poorly characterized	Carbohydrate transport and metabolism	1.67284	0.051655	0.062272	0.075439	0.063122		0.03127		0.044197	0.0377335
OG1RF_12169_2169	YeeN	glucose-1-phosphate adenylyltransferas	Cytoplasmic	Regulatory functions	Biosynthesis and degradation of surface polysaccharides and lipopolysaccharides	1.68727	0.044667	0.026434	0.025161	0.0320873		0.024336	0.017975	0.014741	0.0190173
OG1RF_12454_2454	UbiD2	UbiD family decarboxylase	Unknown	poorly characterized	Pentose phosphate pathway	1.69388	0.091879	0.099254	0.073937	0.0883567	3	0.051079	0.066904	0.038504	0.0521623	3
OG1RF_12158_2158	PenA	penicillin-binding protein 2B	Cytoplasmic Membrane	Cell envelope	Function unknown	1.69813	0.13646	0.12198	0.15214	0.13686	3	0.079659	0.082373	0.079751	0.0805943	3
OG1RF_12232_2232	Tpx	thiol peroxidase	Cytoplasmic	cellular processes and signaling	Function unknown	1.69894	0.031584	0.024922	0.017792	0.024766		0.019666	0.010168	0.013898	0.0145773
OG1RF_10606_606	PolA	DNA-directed DNA polymerase I	Cytoplasmic	DNA metabolism	General function prediction only	1.72753	0.0072622	0.010744	0.0068181	0.00827477			0.0029224	0.0066575	0.00478995
OG1RF_10147_147	Tuf	elongation factor EF1A	Cytoplasmic	Protein synthesis	Carbohydrate transport and metabolism	1.7328	0.32161	0.3812	0.33493	0.345913		0.24401	0.13486	0.22001	0.199627
OG1RF_10233_233	MetC	cystathionine gamma-synthase	Cytoplasmic	metabolism	Translation factors	1.80184	0.021676	0.0080175	0.0050876	0.0115937		0.0063266	0.0065421		0.00643435
OG1RF_12000_2000	NadE2	NAD(+) synthase	Cytoplasmic	Biosynthesis of cofactors, prosthetic groups, and carriers	Inorganic ion transport and metabolism	1.81038	0.023292	0.022974	0.018223	0.0214963		0.0060428	0.012497	0.017082	0.0118739
OG1RF_12535_2535	OG1RF_12535	response regulator	Cytoplasmic	cellular processes and signaling	Pentose phosphate pathway	1.8412	0.032632	0.027588	0.030637	0.0302857		0.0072567		0.025641	0.0164489
OG1RF_10158_158	RplP	50S ribosomal protein L16	Cytoplasmic	Protein synthesis	Carbohydrate transport and metabolism	1.86381	0.051894	0.051186	0.076561	0.0598803		0.04039	0.023866		0.032128
OG1RF_12185_2185	FabD	malonyl-CoA-[acyl-carrier-protein] transacylase	Cytoplasmic	Fatty acid and phospholipid metabolism	General	1.88639	0.041458	0.037484	0.038923	0.0392883		0.016134	0.0083417	0.038006	0.0208272
OG1RF_10281_281	OG1RF_10281	secreted antigen	Extracellular	poorly characterized	Translation factors	1.8867	1.5068	1.7076	1.5544	1.5896	3	0.68199	0.94663	0.89897	0.84253	3
OG1RF_12453_2453	OG1RF_12453	WxL domain surface protein	Unknown	poorly characterized	Pentose phosphate pathway	1.88823	0.03612	0.035626	0.022607	0.031451	3	0.024989	0.01615	0.0088299	0.0166563	3
OG1RF_12333_2333	MreC	rod shape-determining protein MreC	Unknown	Cell envelope	Pentose phosphate pathway	1.9148	0.10078	0.073634	0.084105	0.086173	3	0.040673	0.045063	0.049275	0.0450037	3
OG1RF_10002_2	DnaN	DNA-directed DNA polymerase III beta subunit	Cytoplasmic	DNA metabolism	Carbohydrate transport and metabolism	1.92983	0.03691	0.016803	0.013328	0.022347		0.0044196		0.01874	0.0115798
OG1RF_12083_2083	RplK	50S ribosomal protein L11	Cytoplasmic	Protein synthesis	Function unknown	1.95479	0.19063	0.17299	0.22193	0.195183		0.10683	0.092056	0.10066	0.0998487
OG1RF_11146_1146	GldA	glycerol dehydrogenase	Cytoplasmic	metabolism	Signal transduction mechanisms	1.9682	0.019717	0.013891	0.010578	0.0147287		0.0087693		0.0061973	0.0074833
OG1RF_10124_124	OG1RF_10124	ABC superfamily ATP binding cassette transporter, binding protein	Unknown	poorly characterized	Carbohydrate transport and metabolism	1.97077	0.080739	0.073737	0.067378	0.0739513	3	0.037239	0.045727	0.029606	0.037524	3
OG1RF_12191_2191	GlxR	2-hydroxy-3-oxopropionate reductase	Unknown	metabolism	Function unknown	1.99273	0.018033	0.028458	0.023702	0.0233977	3	0.0056141	0.0058054	0.023805	0.0117415	3
OG1RF_12519_2519	Gor	glutathione-disulfide reductase	Cytoplasmic	Energy metabolism	Pentose phosphate pathway	1.99655	0.0095104	0.0070354	0.0089288	0.00849153		0.0037011	0.0038271	0.0052311	0.0042531
OG1RF_10226_226	FabF	3-oxoacyl-(acyl-carrier-protein) synthase II	Cytoplasmic Membrane	Fatty acid and phospholipid metabolism	Carbohydrate transport and metabolism	2.01106	0.018138	0.023002	0.017029	0.0193897	3	0.014117	0.0062563	0.0085513	0.00964153	3
OG1RF_11828_1828	SufD	iron-sulfur ABC superfamily ATP binding cassette transporter, membrane protein	Cytoplasmic	Biosynthesis of cofactors, prosthetic groups, and carriers	Other	2.03757	0.019954	0.0098407	0.0070252	0.0122733		0.005824	0.0040149	0.0082316	0.0060235
OG1RF_11476_1476	SecA	preprotein translocase subunit SecA	Cytoplasmic	Protein fate	Function unknown	2.06794	0.0050119	0.0037076	0.0058818	0.0048671		0.0019504		0.0027568	0.0023536
OG1RF_10540_540	OG1RF_10540	oligopeptide ABC superfamily ATP binding cassette transporter, binding protein	Cellwall	metabolism	Amino acid transport and metabolism	2.09525	0.03932	0.042661	0.03507	0.039017	3	0.016832	0.017405	0.021628	0.0186217	3
OG1RF_10778_778	PfkA	6-phosphofructokinase	Cytoplasmic	Energy metabolism	Function unknown	2.10087	0.090074	0.088843	0.17539	0.118102		0.049334	0.034905	0.084409	0.056216
OG1RF_10730_730	FtsZ	cell division protein FtsZ	Unknown	Cellular processes	Cell division	2.10798	0.039056	0.043659	0.034223	0.0389793	3	0.022292	0.01886	0.014322	0.0184913	3
OG1RF_10122_122	DeoC	deoxyribose-phosphate aldolase	Cytoplasmic	Purines, pyrimidines, nucleosides, and nucleotides	Carbohydrate transport and metabolism	2.1319	0.05823	0.033503	0.050113	0.047282		0.018884	0.015622	0.032029	0.0221783
OG1RF_10287_287	Pcp	pyroglutamyl-peptidase I	Cytoplasmic	Protein fate	Translation factors	2.13644	0.024712	0.024374	0.02784	0.025642		0.0076934		0.016311	0.0120022
OG1RF_10869_869	OG1RF_10869	von Willebrand factor type A domain protein	Unknown	Cell envelope	Biosynthesis and degradation of surface polysaccharides and lipopolysaccharides	2.16212	0.033875	0.033412	0.038164	0.0351503	3	0.018079	0.017916	0.012777	0.0162573	3
OG1RF_12309_2309	PepA2	glutamyl aminopeptidase	Cytoplasmic	Protein fate	Pentose phosphate pathway	2.16929	0.02982	0.02353	0.013998	0.0224493		0.011605	0.0095999	0.0098412	0.0103487
OG1RF_11986_1986	AtpD2	ATP synthase F1 sector beta subunit	Cytoplasmic Membrane	Energy metabolism	Function unknown	2.17544	0.025092	0.022499	0.014991	0.0208607	3	0.008877	0.0073435	0.012547	0.00958917	3
OG1RF_12374_2374	OG1RF_12374	DAK2 domain protein	Cytoplasmic	poorly characterized	Pentose phosphate pathway	2.21864	0.015305	0.013209	0.014369	0.0142943		0.0044672		0.0084185	0.00644285
OG1RF_11625_1625	Pgk	phosphoglycerate kinase	Cytoplasmic	Energy metabolism	General function prediction only	2.2428	0.12638	0.13261	0.11613	0.12504		0.071159	0.060598	0.035498	0.0557517
OG1RF_10019_19	ManX2	PTS family mannose porter, IIAB component	Cytoplasmic	Transport and binding proteins	Carbohydrate transport and metabolism	2.27518	0.080832	0.085226	0.10467	0.0902427		0.041219	0.04711	0.030663	0.039664
OG1RF_12105_2105	LplA2	lipoate-protein ligase	Cytoplasmic	Protein fate	General function prediction only	2.33315	0.031962	0.028373	0.015004	0.025113		0.0074631		0.014064	0.0107636
OG1RF_11988_1988	AtpA2	ATP synthase F1 sector alpha subunit	Cytoplasmic	Energy metabolism	Function unknown	2.35456	0.018548	0.024393	0.017414	0.0201183		0.0080202		0.0090686	0.0085444
OG1RF_10455_455	FruK2	1-phosphofructokinase	Unknown	metabolism	Translation factors	2.36809	0.035001	0.024166	0.029575	0.0295807	3	0.013621	0.0084511	0.015402	0.0124914	3
OG1RF_12452_2452	UbiD	UbiD family decarboxylase	Extracellular	poorly characterized	Pentose phosphate pathway	2.39567	0.19487	0.18803	0.24261	0.208503	3	0.092321	0.098875	0.069904	0.0870333	3
OG1RF_11078_1078	DnaK	chaperone DnaK	Cytoplasmic	Protein fate	Transcription	2.41108	0.14024	0.15388	0.14318	0.145767		0.057303	0.05079	0.073278	0.060457
OG1RF_11744_1744	PepS	aminopeptidase PepS	Cytoplasmic	metabolism	Transcription	2.41573	0.050835	0.047634	0.021477	0.039982		0.017805	0.012274	0.019573	0.0165507
OG1RF_12331_2331	OG1RF_12331	secreted lipase	Extracellular	poorly characterized	Pentose phosphate pathway	2.41632	0.54282	0.5644	0.72196	0.609727	3	0.24469	0.30581	0.20651	0.252337	3
OG1RF_12006_2006	GroEL	chaperonin GroEL	Cytoplasmic	Protein fate	Signal transduction mechanisms	2.45746	0.19338	0.20631	0.17414	0.191277		0.07372	0.055585	0.1042	0.077835
OG1RF_10152_152	RplD	ribosomal protein L4/L1 family protein	Cytoplasmic	Protein synthesis	Carbohydrate transport and metabolism	2.47261	0.17019	0.14752	0.2082	0.175303		0.084293	0.083014	0.045387	0.070898
OG1RF_10593_593	OpuCC	glycine/betaine/carnitine/choline ABC superfamily ATP binding cassette transporter, binding protein	Cytoplasmic Membrane	Transport and binding proteins	General function prediction only	2.48741	0.17734	0.17835	0.1665	0.174063	3	0.056836	0.072765	0.080332	0.0699777	3
OG1RF_11892_1892	TypA	GTP-binding protein TypA/BipA	Cytoplasmic Membrane	Regulatory functions	Function unknown	2.54985	0.013978	0.018957	0.014763	0.0158993	3	0.0067994	0.0042186	0.0076882	0.0062354	3
OG1RF_10191_191	OG1RF_10191	amino acid ABC superfamily ATP binding cassette transporter, membrane protein	Cytoplasmic Membrane	Transport and binding proteins	Carbohydrate transport and metabolism	2.55552	0.068432	0.050141	0.044055	0.0542093	3	0.022827	0.023604	0.017207	0.0212127	3
OG1RF_11142_1142	PdhB	pyruvate dehydrogenase complex E1 component beta subunit	Cytoplasmic	Energy metabolism	Function unknown	2.5708	0.15767	0.16199	0.27446	0.19804		0.074141	0.044942	0.11202	0.0770343
OG1RF_12187_2187	AcpP	acyl carrier protein	Cytoplasmic	Fatty acid and phospholipid metabolism	General	2.58434	0.18504	0.11232	0.093544	0.130301		0.066471	0.034368		0.0504195
OG1RF_10262_262	OG1RF_10262	S-layer protein	Unknown	poorly characterized	Translation factors	2.60145	0.079816	0.068885	0.12801	0.092237	3	0.036238	0.048179	0.021951	0.035456	3
OG1RF_12081_2081	RplJ	50S ribosomal protein L10	Cytoplasmic	Protein synthesis	Function unknown	2.60589	0.25724	0.24738	0.22339	0.24267		0.080086	0.093165	0.10612	0.0931237
OG1RF_10423_423	PrsA	peptidyl-prolyl cis-trans isomerase	Cytoplasmic Membrane	cellular processes and signaling	Translation factors	2.6259	0.024972	0.024631	0.0087917	0.0194649	3	0.0072885	0.0075368		0.00741265	2
OG1RF_12180_2180	AccC	acetyl-CoA carboxylase subunit A	Cytoplasmic	Fatty acid and phospholipid metabolism	General	2.65937	0.02107	0.013855	0.013188	0.0160377		0.0072885	0.0056526	0.0051508	0.00603063
OG1RF_10338_338	Ohr	organic hydroperoxide resistance protein	Cytoplasmic	Cellular processes	Translation factors	2.71255	0.040133	0.07917	0.090429	0.0699107		0.024989	0.02584	0.02649	0.025773
OG1RF_10141_141	GpmA	phosphoglycerate mutase	Cytoplasmic	metabolism	Carbohydrate transport and metabolism	2.71566	0.24347	0.10622	0.14946	0.166383		0.05102	0.045221	0.087563	0.061268
OG1RF_10199_199	Ldh1	L-lactate dehydrogenase	Cytoplasmic	Energy metabolism	Carbohydrate transport and metabolism	2.75939	0.087417	0.080997	0.059688	0.076034		0.022679	0.019188	0.040797	0.0275547
OG1RF_10616_616	OG1RF_10616	cellulose synthase catalytic subunit	Cytoplasmic Membrane	poorly characterized	General function prediction only	2.78369	0.038792	0.029079	0.029135	0.0323353	3	0.010869	0.013737	0.010242	0.011616	3
OG1RF_10177_177	RpoA	DNA-directed RNA polymerase subunit alpha	Cytoplasmic	Transcription	Carbohydrate transport and metabolism	2.785	0.075276	0.060748	0.051398	0.062474		0.018642	0.011015	0.03764	0.0224323
OG1RF_11327_1327	PpaC	inorganic diphosphatase	Cytoplasmic	metabolism	Function unknown	2.79382	0.034661	0.030768	0.026033	0.0304873		0.0080931	0.0055792	0.019065	0.0109124
OG1RF_11300_1300	Tkt	transketolase	Cytoplasmic	Energy metabolism	Function unknown	2.80102	0.022407	0.02368	0.021037	0.0223747		0.00872	0.0064407	0.0088034	0.00798803
OG1RF_11807_1807	OG1RF_11807	peptidase propeptide and YPEB domain protein	Cytoplasmic Membrane	poorly characterized	Function unknown	2.80724	0.043447	0.055097	0.046617	0.048387	3	0.014492	0.019981		0.0172365	2
OG1RF_12492_2492	RpoC	DNA-directed RNA polymerase subunit beta prime	Cytoplasmic	Transcription	Pentose phosphate pathway	2.85577	0.023684	0.038069	0.030471	0.0307413		0.010241	0.0056479	0.016405	0.0107646
OG1RF_12253_2253	OG1RF_12253	extracellular protein	Extracellular	poorly characterized	Function unknown	2.87512	0.069926	0.059775	0.061273	0.063658	3	0.02177	0.022512		0.022141	2
OG1RF_11470_1470	PstS2	phosphate ABC superfamily ATP binding cassette transporter, binding protein	Cytoplasmic Membrane	Transport and binding proteins	Function unknown	2.87543	0.075179	0.055614	0.063523	0.064772	3	0.02048	0.018152	0.028946	0.022526	3
OG1RF_11931_1931	Upp2	uracil phosphoribosyltransferase	Cytoplasmic	Purines, pyrimidines, nucleosides, and nucleotides	Function unknown	2.94178	0.045971	0.050381	0.043159	0.0465037		0.023853	0.012333	0.011238	0.015808
OG1RF_10498_498	UvrA	excision endonuclease subunit UvrA	Cytoplasmic	DNA metabolism	Translation factors	2.94613	0.0079583	0.015699	0.010674	0.0114438		0.0026546	0.002745	0.0062534	0.00388433
OG1RF_10505_505	ClpP	ATP-dependent Clp protease proteolytic subunit	Cytoplasmic	Protein fate	Translation factors	2.96071	0.065028	0.058795	0.030526	0.0514497		0.016871		0.017884	0.0173775
OG1RF_10100_100	ArcB	ornithine carbamoyltransferase	Cytoplasmic	Energy metabolism	Carbohydrate transport and metabolism	2.97517	0.15121	0.1223	0.10505	0.126187		0.042368	0.031642	0.05323	0.0424133
OG1RF_12147_2147	Glk	glucokinase	Cytoplasmic	poorly characterized	Inorganic ion transport and metabolism	2.97544	0.046271	0.032599	0.037235	0.0387017		0.012862	0.0079801	0.018179	0.013007
OG1RF_10350_350	OG1RF_10350	transcriptional regulator	Cytoplasmic Membrane	Regulatory functions	Translation factors	3.01941	0.17527	0.18335	0.16206	0.17356	3	0.074408	0.051295	0.046741	0.0574813	3
OG1RF_10328_328	OG1RF_10328	peptidoglycan binding protein	Unknown	poorly characterized	Translation factors	3.05484	0.40771	0.31218	0.66481	0.461567	3	0.15031	0.15543	0.14754	0.151093	3
OG1RF_10486_486	OG1RF_10486	WxL domain surface protein	Unknown	poorly characterized	Translation factors	3.05729	0.08347	0.051998	0.065992	0.0671533	3	0.020516	0.021215	0.024164	0.021965	3
OG1RF_10489_489	OG1RF_10489	WxL domain surface protein	Unknown	poorly characterized	Translation factors	3.07105	0.095471	0.085606	0.089633	0.0902367	3	0.033776	0.020956	0.033417	0.029383	3
OG1RF_12305_2305	HtrA	serine protease HtrA	Unknown	cellular processes and signaling	Pentose phosphate pathway	3.08423	0.11646	0.11008	0.091114	0.105885	3	0.037768	0.033196	0.032029	0.034331	3
OG1RF_10370_370	OG1RF_10370	hypothetical protein OG1RF_10370	Unknown	poorly characterized	Translation factors	3.15504	0.056002	0.055237	0.059149	0.056796	3	0.024518	0.014085	0.015402	0.0180017	3
OG1RF_10671_671	OG1RF_10671	extracellular protein	Unknown	poorly characterized	Function unknown	3.19751	0.27872	0.25676	0.24192	0.259133	3	0.079815	0.090998	0.072314	0.0810423	3
OG1RF_10348_348	SodA	superoxide dismutase	Extracellular	metabolism	Translation factors	3.2301	0.14269	0.11468	0.11412	0.12383	3	0.053473	0.038281	0.023255	0.0383363	3
OG1RF_11696_1696	GlmM	phosphoglucosamine mutase	Cytoplasmic	Cell envelope	Function unknown	3.30769	0.023671	0.0093389	0.011111	0.014707		0.0036847		0.0052079	0.0044463
OG1RF_11392_1392	OG1RF_11392	S41A family carboxy-terminal peptidase	Cytoplasmic Membrane	Protein fate	Degradation of proteins, peptides, and glycopeptides	3.34796	0.064497	0.076778	0.068905	0.07006	3	0.020772	0.03222	0.0097865	0.0209262	3
OG1RF_11243_1243	OG1RF_11243	hypothetical protein OG1RF_11243	Unknown	poorly characterized	Function unknown	3.3493	0.027809	0.01981	0.026108	0.0245757	3	0.0072147	0.0074604		0.00733755	2
OG1RF_11167_1167	AlaS	alanine--tRNA ligase	Cytoplasmic	Protein synthesis	Signal transduction mechanisms	3.36793	0.021836	0.033503	0.038723	0.031354		0.0094419	0.0078108	0.010676	0.00930957
OG1RF_11692_1692	GlmS	D-fructose-6-phosphate amidotransferase	Cytoplasmic	Cell envelope	Defense mechanisms	3.38742	0.023053	0.01924	0.018314	0.0202023		0.0082813	0.0057089	0.0039016	0.00596393
OG1RF_10133_133	DeoB	phosphopentomutase	Cytoplasmic	Purines, pyrimidines, nucleosides, and nucleotides	Carbohydrate transport and metabolism	3.44139	0.01926	0.03528	0.012916	0.0224853		0.0064244	0.0066432		0.0065338
OG1RF_12164_2164	OG1RF_12164	ErfK/YbiS/YcfS/YnhG family protein	Unknown	poorly characterized	Function unknown	3.56793	0.11763	0.14886	0.11044	0.125643	3	0.036276	0.05716	0.012208	0.0352147	3
OG1RF_10140_140	Adh3	putative alcohol dehydrogenase (NADP(+))	Cytoplasmic	metabolism	Carbohydrate transport and metabolism	3.57471	0.018682	0.015794	0.020045	0.0181737			0.004296	0.0058719	0.00508395
OG1RF_12493_2493	RpoB	DNA-directed RNA polymerase subunit beta	Cytoplasmic	Transcription	Pentose phosphate pathway	3.58097	0.032725	0.03664	0.033215	0.0341933		0.011014	0.0049829	0.012649	0.00954863
OG1RF_12327_2327	SrtA	sortase SrtA	Cytoplasmic Membrane	Cell envelope	Pentose phosphate pathway	3.59198	0.16626	0.16399	0.082152	0.137467	3	0.034053	0.042255	0.038504	0.0382707	3
OG1RF_11477_1477	YfiA	ribosomal subunit interface protein	Cytoplasmic	Protein synthesis	Function unknown	3.59889	0.073429	0.055712	0.09015	0.073097		0.021981		0.018641	0.020311
OG1RF_10227_227	FabZ	(3R)-hydroxymyristoyl-[acyl-carrier-protein] dehydratase	Cytoplasmic	Fatty acid and phospholipid metabolism	Carbohydrate transport and metabolism	3.60521	0.074135	0.058498	0.069601	0.0674113		0.01154	0.011933	0.032622	0.0186983
OG1RF_10634_634	OppA	oligopeptide ABC superfamily ATP binding cassette transporter, binding protein	Cellwall	Transport and binding proteins	Function unknown	3.64023	0.18816	0.16287	0.12438	0.15847	3	0.03736	0.050995	0.042244	0.043533	3
OG1RF_11144_1144	Lpd	dihydrolipoyl dehydrogenase	Cytoplasmic	metabolism	Function unknown	3.68967	0.068432	0.062998	0.057822	0.063084		0.019529	0.0091794	0.022584	0.0170975
OG1RF_12509_2509	OG1RF_12509	pheromone cAD1 lipoprotein	Unknown	poorly characterized	Pentose phosphate pathway	3.71653	0.10365	0.11927	0.13299	0.118637	3	0.040334	0.025025	0.030405	0.0319213	3
OG1RF_11278_1278	OG1RF_11278	hypothetical protein OG1RF_11278	Cytoplasmic	poorly characterized	Function unknown	3.7614	0.1414	0.12552	0.086287	0.117736		0.038518	0.03983	0.015555	0.031301
OG1RF_10146_146	FusA	elongation factor G	Cytoplasmic	Protein synthesis	Carbohydrate transport and metabolism	3.77663	0.17253	0.21424	0.23719	0.207987		0.057551	0.048353	0.059312	0.055072
OG1RF_11305_1305	Ndh	NADH dehydrogenase	Cytoplasmic	poorly characterized	Inorganic ion transport and metabolism	3.81104	0.10605	0.12319	0.095137	0.108126		0.038518	0.02845	0.018147	0.0283717
OG1RF_10703_703	RplU	50S ribosomal protein L21	Unknown	Protein synthesis	Function unknown	3.84588	0.24072	0.5368	0.91382	0.56378	3	0.13848	0.15162	0.14968	0.146593	3
OG1RF_12325_2325	OG1RF_12325	putative lipoprotein	Unknown	poorly characterized	Pentose phosphate pathway	3.9309	0.044276	0.033966	0.036949	0.038397	3	0.007658	0.011878		0.009768	2
OG1RF_10945_945	FbaB	fructose-bisphosphate aldolase	Cytoplasmic	Energy metabolism	Function unknown	3.93819	0.15145	0.1093	0.23929	0.16668		0.051751	0.038649	0.036572	0.042324
OG1RF_10115_115	GuaA	GMP synthase (glutamine-hydrolyzing)	Cytoplasmic	Purines, pyrimidines, nucleosides, and nucleotides	Carbohydrate transport and metabolism	3.94306	0.065695	0.058723	0.042403	0.055607		0.015979	0.0082615	0.018067	0.0141025
OG1RF_11626_1626	Gap2	glyceraldehyde-3-phosphate dehydrogenase (phosphorylating)	Cytoplasmic	Energy metabolism	General function prediction only	3.96905	0.83672	0.72095	1.0775	0.87839		0.27946	0.17287	0.2116	0.22131
OG1RF_10534_534	LeuS	leucine--tRNA ligase	Cytoplasmic	Protein synthesis	Function unknown	3.99713	0.0091132	0.012841	0.013445	0.0117997		0.0030398		0.0028643	0.00295205
OG1RF_10107_107	OG1RF_10107	family 20 glycosyl hydrolase	Cytoplasmic Membrane	metabolism	Carbohydrate transport and metabolism	4.0971	0.49919	0.61392	0.72956	0.614223	3	0.12821	0.1265	0.19504	0.149917	3
OG1RF_11204_1204	Pgi	glucose-6-phosphate isomerase	Cytoplasmic	Energy metabolism	Enzymes of unknown specificity	4.13564	0.05944	0.072699	0.073662	0.0686003		0.016655	0.0095678	0.02354	0.0165876
OG1RF_12488_2488	Dps	DNA starvation/stationary phase protection protein Dps	Cytoplasmic	metabolism	Pentose phosphate pathway	4.23121	0.13775	0.12228	0.058195	0.106075		0	0.022173	0.053036	0.0250697
OG1RF_10983_983	Npr	NADH peroxidase	Cytoplasmic	poorly characterized	Transcription	4.37086	0.036575	0.036076	0.021462	0.031371		0.010675	0.0036796		0.0071773
OG1RF_10448_448	PtsI	PTS family porter, enzyme I	Cytoplasmic	Signal transduction	Translation factors	4.42222	0.12439	0.1465	0.092382	0.121091		0.02023	0.014942	0.046975	0.0273823
OG1RF_10894_894	PheT	phenylalanyl-tRNA synthetase beta subunit	Cytoplasmic	Protein synthesis	Transcription	4.45272	0.014551	0.023486	0.018629	0.0188887		0.0041184		0.0043657	0.00424205
OG1RF_11697_1697	OG1RF_11697	hypothetical protein OG1RF_11697	Unknown	poorly characterized	Function unknown	4.75541	0.030344	0.024487	0.023308	0.0260463	3	0.004294	0.0066604		0.0054772	2
OG1RF_12203_2203	OG1RF_12203	ABC superfamily ATP binding cassette transporter, substrate-binding protein	Unknown	metabolism	Carbohydrate transport and metabolism	4.81186	0.1253	0.12359	0.11058	0.119823	3	0.021455	0.020169	0.033081	0.0249017	3
OG1RF_10099_99	ArcA	arginine deiminase	Cytoplasmic	Energy metabolism	Carbohydrate transport and metabolism	4.87219	0.041864	0.041293	0.039304	0.0408203		0.010182	0.0063176	0.0086351	0.00837823
OG1RF_11170_1170	PepT	M20 family tripeptide aminopeptidase	Cytoplasmic	Protein fate	General	4.94297	0.026101	0.018021	0.017154	0.0204253		0.004063	0.0042014		0.0041322
OG1RF_12231_2231	ValS	valine--tRNA ligase	Cytoplasmic	Protein synthesis	Function unknown	5.17245	0.013344	0.020341	0.012528	0.0154043			0.0019527	0.0040036	0.00297815
OG1RF_10871_871	OG1RF_10871	cell wall surface anchor family protein	Cellwall	Cell envelope	Biosynthesis and degradation of surface polysaccharides and lipopolysaccharides	5.17645	0.0647	0.065495	0.043159	0.0577847	3	0.015902	0.0082219	0.0093651	0.011163	3
OG1RF_11329_1329	PflB	formate acetyltransferase	Cytoplasmic	Energy metabolism	Function unknown	5.46401	0.022835	0.026746	0.020099	0.0232267		0.0022216		0.0062801	0.00425085
OG1RF_10499_499	OG1RF_10499	hypothetical protein OG1RF_10499	Unknown	poorly characterized	Translation factors	5.4711	0.044481	0.043873	0.030371	0.039575	3	0.0062946	0.006509	0.0088968	0.00723347	3
OG1RF_10355_355	NrdF	ribonucleotide-diphosphate reductase subunit beta	Unknown	Purines, pyrimidines, nucleosides, and nucleotides	Translation factors	5.47937	0.043234	0.032802	0.028101	0.0347123	3		0.0053532	0.007317	0.0063351	2
OG1RF_10463_463	GatB	glutamyl-tRNA(Gln) amidotransferase subunit B	Cytoplasmic	Protein synthesis	Translation factors	5.59275	0.042612	0.046454	0.035795	0.0416203		0.0052367	0.0072201	0.0098687	0.00744183
OG1RF_10356_356	NrdE	ribonucleotide-diphosphate reductase subunit alpha	Unknown	metabolism	Translation factors	5.62965	0.035634	0.032219	0.022303	0.030052	3	0.0023112	0.0071699	0.0065334	0.00533817	3
OG1RF_11932_1932	GlyA	serine hydroxymethyltransferase	Cytoplasmic	metabolism	Function unknown	5.65886	0.04664	0.028113	0.026759	0.0338373		0.0080669	0.0041708	0.0057009	0.00597953
OG1RF_11644_1644	AckA	acetate kinase	Cytoplasmic	Energy metabolism	Signal transduction mechanisms	5.80223	0.12432	0.11463	0.096419	0.11179		0.023139	0.010876	0.023785	0.0192667
OG1RF_12103_2103	AhpC	peroxiredoxin	Cytoplasmic	Cellular processes	Function unknown	6.38613	0.15414	0.10699	0.10719	0.122773		0.01333		0.02512	0.019225
OG1RF_12311_2311	TraC2	peptide ABC superfamily ATP binding cassette transporter, binding protein	Cellwall	metabolism	Pentose phosphate pathway	6.40885	0.083311	0.074529	0.056388	0.0714093	3	0.0060319	0.012475	0.01492	0.0111423	3
OG1RF_11012_1012	OG1RF_11012	hypothetical protein OG1RF_11012	Unknown	poorly characterized	Function unknown	6.45144	0.11525	0.16153	0.19362	0.1568	3	0.023605	0.029291	0.020018	0.0243047	3
OG1RF_10736_736	IleS	isoleucine--tRNA ligase	Cytoplasmic	Protein synthesis	Function unknown	6.46127	0.027461	0.033857	0.02041	0.0272427		0.0026717	0.0036836	0.0062936	0.0042163
OG1RF_11302_1302	AmiD3	N-acetylmuramoyl-L-alanine amidase	Extracellular	Cell envelope	Carbohydrate transport and metabolism	6.49642	0.46285	0.47125	0.75695	0.563683	3	0.078441	0.075104	0.10676	0.0867683	3
OG1RF_11033_1033	OG1RF_11033	sulfatase domain protein	Cytoplasmic Membrane	Cell envelope	Biosynthesis and degradation of surface polysaccharides and lipopolysaccharides	6.56018	0.35889	0.38848	0.4069	0.384757	3	0.05918	0.046509	0.070262	0.0586503	3
OG1RF_11219_1219	OG1RF_11219	beta-lactamase	Unknown	cellular processes and signaling	Defense mechanisms	6.98057	0.16606	0.17048	0.21318	0.18324	3	0.026377	0.030004	0.022369	0.02625	3
OG1RF_10402_402	PepV	dipeptidase PepV	Cytoplasmic	Protein fate	Translation factors	7.06131	0.05893	0.053654	0.053198	0.0552607		0.012349	0.0036484	0.0074801	0.00782583
OG1RF_11624_1624	TpiA	triose-phosphate isomerase	Cytoplasmic	Energy metabolism	General function prediction only	7.07469	0.14886	0.083901	0.09184	0.1082		0.016552		0.014036	0.015294
OG1RF_11761_1761	OG1RF_11761	ABC superfamily ATP binding cassette transporter, binding protein	Unknown	metabolism	Carbohydrate transport and metabolism	7.14666	0.23845	0.25029	0.23824	0.242327	3	0.03235	0.040495	0.028878	0.0339077	3
OG1RF_12464_2464	OG1RF_12464	ABC superfamily ATP binding cassette transporter, binding protein	Cytoplasmic Membrane	metabolism	Pentose phosphate pathway	7.65524	0.12952	0.085166	0.11423	0.109639	3	0.012219	0.022112	0.0086351	0.014322	3
OG1RF_11623_1623	Eno	enolase	Cytoplasmic	Energy metabolism	General function prediction only	7.66669	0.49176	0.55573	0.65657	0.56802		0.088474	0.057677	0.076117	0.0740893
OG1RF_10496_496	GlnP	amino acid ABC superfamily ATP binding cassette transporter, binding/permease protein	Cytoplasmic Membrane	Transport and binding proteins	Translation factors	8.53981	0.12864	0.11667	0.11383	0.119713	3	0.017262	0.01666	0.0081328	0.0140183	3
OG1RF_10782_782	Gnd	phosphogluconate dehydrogenase	Cytoplasmic	Energy metabolism	General function prediction only	9.45403	0.058681	0.060105	0.052973	0.057253		0.0052699	0.0054494	0.0074485	0.00605593
OG1RF_12343_2343	OG1RF_12343	hypothetical protein OG1RF_12343	Cellwall	poorly characterized	Pentose phosphate pathway	12.3843	0.022172	0.025919	0.036235	0.0281087	3	0.0025566	0.0019828		0.0022697	2
OG1RF_10724_724	PbpC	penicillin-binding protein C	Cytoplasmic Membrane	Cell envelope	Cell division	13.7574	0.093518	0.10785	0.089149	0.096839	3	0.0078386	0.0069476	0.0063309	0.00703903	3
OG1RF_10064_64	OG1RF_10064	glycoside hydrolase family protein	Cytoplasmic Membrane	metabolism	Carbohydrate transport and metabolism	21.0621	0.17678	0.16896	0.1724	0.172713	3	0.0085329	0.0055147	0.010553	0.0082002	3
OG1RF_10007_7	RpsF	30S ribosomal protein S6	Cytoplasmic	Protein synthesis	Carbohydrate transport and metabolism	off D27	off D27	off D27	off D27	off D27			0.025776	0.023488	0.024632
OG1RF_10056_56	OG1RF_10056	5'-nucleotidase	Cellwall	Cell envelope	Carbohydrate transport and metabolism	off D27	off	off	off	off		0.020006	0.024567	0.020324	0.0216323	3
OG1RF_10155_155	RpsS	30S ribosomal protein S19	Cytoplasmic	Protein synthesis	Carbohydrate transport and metabolism	off D27	off D27	off D27	off D27	off D27		0.081283	0.065373	0.038295	0.0616503
OG1RF_10159_159	RpmC	50S ribosomal protein L29	Cytoplasmic	Protein synthesis	Carbohydrate transport and metabolism	off D27	off D27	off D27	off D27	off D27		0.053606	0.041574	0.037883	0.0443543
OG1RF_10160_160	RpsQ	30S ribosomal protein S17	Cytoplasmic	Protein synthesis	Carbohydrate transport and metabolism	off D27	off D27	off D27	off D27	off D27		0.017492	0.018088		0.01779
OG1RF_10167_167	RplR	50S ribosomal protein L18	Cytoplasmic	Protein synthesis	Carbohydrate transport and metabolism	off D27	off D27	off D27	off D27	off D27		0.054935	0.078108	0.038822	0.0572883
OG1RF_10169_169	RpmD	50S ribosomal protein L30	Cytoplasmic	Protein synthesis	Carbohydrate transport and metabolism	off D27	off D27	off D27	off D27	off D27		0.028166	0.043688		0.035927
OG1RF_10386_386	OG1RF_10386	nitroreductase	Unknown	poorly characterized	Translation factors	off D27	off	off	off	off		0.0083928	0.017357	0.011862	0.0125373	3
OG1RF_10504_504	OG1RF_10504	thioredoxin superfamily protein	Cytoplasmic	cellular processes and signaling	Translation factors	off D27	off D27	off D27	off D27	off D27		0.0096615	0.0099906		0.0065507
OG1RF_10643_643	RplT	50S ribosomal protein L20	Cytoplasmic	Protein synthesis	Transposon functions	off D27	off D27	off D27	off D27	off D27		0.10473	0.1083	0.029606	0.0808787
OG1RF_10917_917	GloA5	lactoylglutathione lyase	Cytoplasmic	metabolism	Function unknown	off D27	off D27	off D27	off D27	off D27		0.013401	0.013858		0.0136295
OG1RF_10952_952	OG1RF_10952	hypothetical protein	Cytoplasmic	poorly characterized	Function unknown	off D27	off D27	off D27	off D27	off D27		0.091195	0.05239	0.028643	0.0574093
OG1RF_11155_1155	CspA	cold shock protein CspA	Cytoplasmic	information storage and processing	Function unknown	off D27	off D27	off D27	off D27	off D27		0.088125	0.052072	0.035587	0.0585947
OG1RF_11253_1253	Tig2	peptidylprolyl isomerase	Unknown	Protein fate	Conserved	off D27	off	off	off	off		0.0062709	0.0064845		0.0063777	2
OG1RF_11259_1259	RluB	ribosomal large subunit pseudouridine synthase B	Cytoplasmic	Protein synthesis	General function prediction only	off D27	off D27	off D27	off D27	off D27		0.010473	0.01083	0.024672	0.015325
OG1RF_11525_1525	SprE	SprE protein	Extracellular	metabolism	General function prediction only	off D27	off	off	off	off		0.031301	0.050021		0.0271073	2
OG1RF_11566_1566	RimM	16S rRNA processing protein RimM	Cytoplasmic	Transcription	Carbohydrate transport and metabolism	off D27	off D27	off D27	off D27	off D27		0.0095505	0.014814		0.0081215
OG1RF_11734_1734	RmlA	glucose-1-phosphate thymidylyltransferase	Cytoplasmic	Cell envelope	Biosynthesis and degradation of surface polysaccharides and lipopolysaccharides	off D27	off D27	off D27	off D27	off D27		0.0057701		0.012233	0.00900155
OG1RF_11769_1769	OG1RF_11769	hypothetical protein	Unknown	poorly characterized	Function unknown	off D27	off	off	off	off			0.0020473	0.0037311	0.0028892	2
OG1RF_11830_1830	Frr	ribosome recycling factor	Cytoplasmic	Protein synthesis	Other	off D27	off D27	off D27	off D27	off D27		0.022456	0.023221	0.012696	0.0194577
OG1RF_11874_1874	RpsT	30S ribosomal protein S20	Cytoplasmic	Protein synthesis	Inorganic ion transport and metabolism	off D27	off D27	off D27	off D27	off D27		0.055925	0.041307		0.0324107
OG1RF_11924_1924	OG1RF_11924	cell wall surface anchor family protein	Cellwall	Cell envelope	Other	off D27	off	off	off	off		0.012159	0.016166	0.010639	0.012988	3
OG1RF_12016_2016	OG1RF_12016	diacylglycerol kinase catalytic domain protein	Cytoplasmic	poorly characterized	Enzymes of unknown specificity	off D27	off D27	off D27	off D27	off D27		0.010969	0.017014		0.00932767
OG1RF_12080_2080	RplL2	ribosomal protein L7/L12	Cytoplasmic	Protein synthesis	Function unknown	off D27	off D27	off D27	off D27	off D27		0.027242		0.019252	0.023247
OG1RF_12351_2351	OG1RF_12351	ferric (Fe+3) ABC superfamily ATP binding cassette transporter, binding protein	Cytoplasmic Membrane	metabolism	Pentose phosphate pathway	off D27	off	off	off	off		0.015727	0.013552		0.0146395	2
OG1RF_12372_2372	PlsX	fatty acid/phospholipid synthesis protein PlsX	Cytoplasmic	Fatty acid and phospholipid metabolism	Pentose phosphate pathway	off D27	off D27	off D27	off D27	off D27			0.0051603	0.0070533	0.0061068
OG1RF_12375_2375	Asp2	Gls24 family general stress protein	Unknown	poorly characterized	Pentose phosphate pathway	off D27	off	off	off	off			0.01432	0.019573	0.0169465	2
AAM75226.1_20	Ef0020	Ssb protein		DNA metabolism	DNA replication, recombination, and repair	off UW3114	0.028093		0.013188	0.0206405	2	off	off	off	off
AAM75228.1_22	Ef0022	Conserved hypothetical		poorly characterized	Function unknown	off UW3114		0.028204	0.026846	0.027525	2	off	off	off	off
AAM75246.1_39	Ef0040	Choloylglycine hydrolase		Cell envelope	DNA replication, recombination, and repair	off UW3114	0.016474	0.022749	0.012374	0.017199	3	off	off	off	off
OG1RF_10006_6	GyrA	DNA topoisomerase (ATP-hydrolyzing) subunit A	Cytoplasmic	DNA metabolism	Carbohydrate transport and metabolism	off UW3114	0.010253	0.0088484	0.012032	0.0103778		off UW3114	off UW3114	off UW3114	off UW3114
OG1RF_10008_8	Ssb	single-stranded DNA-binding protein	Cytoplasmic	DNA metabolism	Carbohydrate transport and metabolism	off UW3114	0.079498	0.039206	0.063974	0.0608927		off UW3114	off UW3114	off UW3114	off UW3114
OG1RF_10013_13	PurA	adenylosuccinate synthase	Cytoplasmic	Purines, pyrimidines, nucleosides, and nucleotides	Carbohydrate transport and metabolism	off UW3114	0.013599	0.0067067	0.0063838	0.0088965		off UW3114	off UW3114	off UW3114	off UW3114
OG1RF_10021_21	OG1RF_10021	PTS family mannose/fructose/sorbose porter component IID	Cytoplasmic Membrane	Transport and binding proteins	Carbohydrate transport and metabolism	off UW3114	0.042279	0.038226	0.036385	0.0389633	3	off	off	off	off
OG1RF_10042_42	GltX	glutamate--tRNA ligase	Cytoplasmic	Protein synthesis	Carbohydrate transport and metabolism	off UW3114	0.01522	0.017156	0.01633	0.0162353		off UW3114	off UW3114	off UW3114	off UW3114
OG1RF_10044_44	CysS	cysteine--tRNA ligase	Cytoplasmic	Protein synthesis	Carbohydrate transport and metabolism	off UW3114		0.0088114	0.014677	0.00782947		off UW3114	off UW3114	off UW3114	off UW3114
OG1RF_10054_54	PurR	purine operon repressor	Cytoplasmic	Purines, pyrimidines, nucleosides, and nucleotides	Carbohydrate transport and metabolism	off UW3114	0.023462	0.026999	0.022028	0.024163		off UW3114	off UW3114	off UW3114	off UW3114
OG1RF_10055_55	GlmU	UDP-N-acetylglucosamine diphosphorylase	Cytoplasmic	Cell envelope	Carbohydrate transport and metabolism	off UW3114	0.023157	0.015989	0.017393	0.0188463		off UW3114	off UW3114	off UW3114	off UW3114
OG1RF_10069_69	OG1RF_10069	hypothetical protein	Cytoplasmic Membrane	poorly characterized	Carbohydrate transport and metabolism	off UW3114	0.011237	0.011084	0.01055	0.010957	3	off	off	off	off
OG1RF_10101_101	ArcC	carbamate kinase	Cytoplasmic	Energy metabolism	Carbohydrate transport and metabolism	off UW3114	0.034437	0.04076	0.032331	0.0358427		off UW3114	off UW3114	off UW3114	off UW3114
OG1RF_10102_102	NtcA	global nitrogen regulator NtcA	Unknown	cellular processes and signaling	Carbohydrate transport and metabolism	off UW3114	0.009283	0.0091562		0.0061464	2	off	off	off	off
OG1RF_10121_121	Pdp	pyrimidine-nucleoside phosphorylase	Cytoplasmic	Purines, pyrimidines, nucleosides, and nucleotides	Carbohydrate transport and metabolism	off UW3114	0.0091048	0.013471	0.012822	0.0117993		off UW3114	off UW3114	off UW3114	off UW3114
OG1RF_10134_134	DeoD	purine-nucleoside phosphorylase	Cytoplasmic	Purines, pyrimidines, nucleosides, and nucleotides	Carbohydrate transport and metabolism	off UW3114	0.011774		0.014739	0.00883767		off UW3114	off UW3114	off UW3114	off UW3114
OG1RF_10135_135	OG1RF_10135	purine nucleoside phosphorylase	Cytoplasmic	Purines, pyrimidines, nucleosides, and nucleotides	Carbohydrate transport and metabolism	off UW3114	0.0090855	0.0089614		0.00601563		off UW3114	off UW3114	off UW3114	off UW3114
OG1RF_10136_136	OG1RF_10136	iron (Fe3+) ABC superfamily ATP binding cassette transporter, binding protein	Cytoplasmic Membrane	metabolism	Carbohydrate transport and metabolism	off UW3114	0.030795	0.033749	0.038548	0.034364	3	off	off	off	off
OG1RF_10149_149	Cfa	cyclopropane-fatty-acyl-phospholipid synthase	Cytoplasmic	Cell envelope	Carbohydrate transport and metabolism	off UW3114	0.010119	0.0049903		0.00503643		off UW3114	off UW3114	off UW3114	off UW3114
OG1RF_10165_165	RpsH	30S ribosomal protein S8	Cytoplasmic	Protein synthesis	Carbohydrate transport and metabolism	off UW3114	0.16175	0.23133	0.30371	0.232263		off UW3114	off UW3114	off UW3114	off UW3114
OG1RF_10186_186	OG1RF_10186	protein of hypothetical function DUF74	Unknown	poorly characterized	Carbohydrate transport and metabolism	off UW3114	0.031094	0.020446		0.01718	2	off	off	off	off
OG1RF_10209_209	FtsH	cell division protein FtsH	Cytoplasmic Membrane	Cellular processes	Carbohydrate transport and metabolism	off UW3114	0.0044174	0.0058094	0.0055297	0.00525217	3	off	off	off	off
OG1RF_10212_212	LysS	lysine--tRNA ligase	Cytoplasmic	Protein synthesis	Carbohydrate transport and metabolism	off UW3114	0.027868	0.014801	0.0161	0.0195897		off UW3114	off UW3114	off UW3114	off UW3114
OG1RF_10245_245	PepC	aminopeptidase C	Cytoplasmic	metabolism	Translation factors	off UW3114	0.014492	0.014294	0.013605	0.0141303		off UW3114	off UW3114	off UW3114	off UW3114
OG1RF_10258_258	IscS	cysteine desulfurase	Cytoplasmic	metabolism	Translation factors	off UW3114		0.008291	0.0052612	0.0045174		off UW3114	off UW3114	off UW3114	off UW3114
OG1RF_10266_266	OG1RF_10266	amidohydrolase	Cytoplasmic	metabolism	Translation factors	off UW3114	0.005298	0.0052256		0.00350787		off UW3114	off UW3114	off UW3114	off UW3114
OG1RF_10301_301	OG1RF_10301	efflux transporter	Unknown	Cell envelope	Translation factors	off UW3114	0.0054467	0.010744	0.0051135	0.0071014	3	off	off	off	off
OG1RF_10315_315	OG1RF_10315	TRAP-T family tripartite ATP-independent periplasmic transporter, binding protein	Unknown	Transport and binding proteins	Translation factors	off UW3114	0.022307	0.012573	0.026926	0.020602	3	off	off	off	off
OG1RF_10330_330	MenB	naphthoate synthase	Cytoplasmic	Biosynthesis of cofactors, prosthetic groups, and carriers	Translation factors	off UW3114	0.036939	0.018217	0.05202	0.0357253		off UW3114	off UW3114	off UW3114	off UW3114
OG1RF_10351_351	NagB	glucosamine-6-phosphate deaminase	Cytoplasmic	Central intermediary metabolism	Translation factors	off UW3114	0.0091635	0.0090383	0.008603	0.00893493		off UW3114	off UW3114	off UW3114	off UW3114
OG1RF_10362_362	MorA	aldo/keto reductase family protein	Cytoplasmic	poorly characterized	Translation factors	off UW3114	0.0073371	0.0072368		0.00485797		off UW3114	off UW3114	off UW3114	off UW3114
OG1RF_10366_366	TyrS	tyrosine--tRNA ligase	Cytoplasmic	Protein synthesis	Translation factors	off UW3114	0.035332	0.03236	0.021325	0.0296723		off UW3114	off UW3114	off UW3114	off UW3114
OG1RF_10367_367	OG1RF_10367	decarboxylase	Cytoplasmic	Cellular processes	Translation factors	off UW3114	0.044768	0.039061	0.035564	0.0397977		off UW3114	off UW3114	off UW3114	off UW3114
OG1RF_10392_392	OG1RF_10392	M3 family peptidase	Cytoplasmic	metabolism	Translation factors	off UW3114		0.010391	0.0049453	0.0051121		off UW3114	off UW3114	off UW3114	off UW3114
OG1RF_10422_422	Cbf	CMP-binding-factor 1	Cytoplasmic	poorly characterized	Translation factors	off UW3114	0.010199	0.01006	0.0063838	0.00888093		off UW3114	off UW3114	off UW3114	off UW3114
OG1RF_10434_434	LacD1	tagatose-bisphosphate aldolase	Unknown	Energy metabolism	Translation factors	off UW3114	0.0098542		0.0061677	0.00534063	2	off	off	off	off
OG1RF_10435_435	OG1RF_10435	hypothetical protein	Cytoplasmic	information storage and processing	Translation factors	off UW3114	0.012063	0.011898	0.011325	0.011762		off UW3114	off UW3114	off UW3114	off UW3114
OG1RF_10436_436	OG1RF_10436	GNAT family acetyltransferase	Cytoplasmic	poorly characterized	Translation factors	off UW3114	0.052257	0.02209	0.014018	0.029455		off UW3114	off UW3114	off UW3114	off UW3114
OG1RF_10439_439	PrfC	peptide chain release factor RF3	Cytoplasmic	Protein synthesis	Translation factors	off UW3114	0.0040746	0.0060284	0.0038254	0.0046428		off UW3114	off UW3114	off UW3114	off UW3114
OG1RF_10442_442	OG1RF_10442	putative lipoprotein	Unknown	poorly characterized	Translation factors	off UW3114	0.0059974		0.0056306	0.003876	2	off	off	off	off
OG1RF_10459_459	LigA	NAD-dependent DNA ligase LigA	Cytoplasmic	DNA metabolism	Translation factors	off UW3114	0.007896	0.0077882	0.0044479	0.0067107		off UW3114	off UW3114	off UW3114	off UW3114
OG1RF_10465_465	RumA	23S rRNA (uracil-5-)-methyltransferase	Cytoplasmic	Protein synthesis	Translation factors	off UW3114	0.0068432	0.0067497		0.00453097		off UW3114	off UW3114	off UW3114	off UW3114
OG1RF_10483_483	OG1RF_10483	rhodanese family protein	Cytoplasmic	poorly characterized	Translation factors	off UW3114	0.010135	0.013329	0.012687	0.0120503		off UW3114	off UW3114	off UW3114	off UW3114
OG1RF_10488_488	OG1RF_10488	WxL domain surface protein	Unknown	Cell envelope	Translation factors	off UW3114	0.006109	0.0060255	0.0028677	0.00500073	3	off	off	off	off
OG1RF_10495_495	OG1RF_10495	ABC superfamily ATP binding cassette transporter, ABC protein	Cytoplasmic Membrane	metabolism	Translation factors	off UW3114		0.0085956	0.012273	0.0069562	2	off	off	off	off
OG1RF_10517_517	MetK	methionine adenosyltransferase	Cytoplasmic	Central intermediary metabolism	Translation factors	off UW3114	0.029805	0.03207	0.017807	0.0265607		off UW3114	off UW3114	off UW3114	off UW3114
OG1RF_10550_550	OG1RF_10550	family 8 polysaccharide lyase	Cytoplasmic Membrane	Cell envelope	Surface structures	off UW3114	0.035089	0.038804	0.032943	0.035612	3	off	off	off	off
OG1RF_10552_552	RplY	50S ribosomal protein L25	Cytoplasmic	Protein synthesis	Function unknown	off UW3114	0.036994	0.020851		0.0192817		off UW3114	off UW3114	off UW3114	off UW3114
OG1RF_10598_598	QueA	S-adenosylmethionine:tRNA ribosyltransferase-isomerase	Cytoplasmic	Protein synthesis	Function unknown	off UW3114	0.0062247	0.0061397	0.0058441	0.0060695		off UW3114	off UW3114	off UW3114	off UW3114
OG1RF_10621_621	OG1RF_10621	amino acid ABC superfamily ATP binding cassette transporter, membrane protein	Cytoplasmic Membrane	Transport and binding proteins	Amino acids, peptides and amines	off UW3114	0.037265	0.025946	0.026754	0.0299883	3	off	off	off	off
OG1RF_10627_627	Aad	aldehyde-alcohol dehydrogenase	Cytoplasmic	metabolism	Function unknown	off UW3114	0.023395	0.030362	0.027744	0.027167		off UW3114	off UW3114	off UW3114	off UW3114
OG1RF_10638_638	OppD	ABC superfamily ATP binding cassette transporter, ABC protein	Cytoplasmic Membrane	Transport and binding proteins	Transcription	off UW3114	0.0060656	0.011965	0.0056946	0.0079084	3	off	off	off	off
OG1RF_10639_639	OppF	ABC superfamily ATP binding cassette transporter, ABC protein	Cytoplasmic Membrane	Transport and binding proteins	Transcription	off UW3114	0.010071	0.0066224	0.0094552	0.0087162	3	off	off	off	off
OG1RF_10657_657	MetG	methionine--tRNA ligase	Cytoplasmic	Protein synthesis	Amino acid transport and metabolism	off UW3114	0.017346	0.021775	0.022207	0.0204427		off UW3114	off UW3114	off UW3114	off UW3114
OG1RF_10665_665	OG1RF_10665	ABC superfamily ATP binding cassette transporter, ABC protein	Cytoplasmic Membrane	metabolism	Carbohydrate transport and metabolism	off UW3114	0.0087265	0.0086073	0.0054619	0.00759857	3	off	off	off	off
OG1RF_10672_672	OG1RF_10672	GNAT family acetyltransferase	Cytoplasmic	poorly characterized	General function prediction only	off UW3114	0.028544	0.016892	0.016079	0.020505		off UW3114	off UW3114	off UW3114	off UW3114
OG1RF_10708_708	PepQ	xaa-Pro dipeptidase	Cytoplasmic	metabolism	General function prediction only	off UW3114	0.027141	0.023796	0.014156	0.0216977		off UW3114	off UW3114	off UW3114	off UW3114
OG1RF_10710_710	Asp	alkaline shock protein	Cytoplasmic	poorly characterized	General function prediction only	off UW3114	0.014931	0.02209		0.0123403		off UW3114	off UW3114	off UW3114	off UW3114
OG1RF_10726_726	MurD	UDP-N-acetylmuramoylalanine--D-glutamate ligase	Cytoplasmic	Cell envelope	Cell division	off UW3114	0.016388	0.011546	0.013188	0.0137073		off UW3114	off UW3114	off UW3114	off UW3114
OG1RF_10727_727	MurG	UDP-N-acetylglucosamine--N-acetylmuramyl-(pentapeptide) pyrophosphoryl-undecaprenol N-acetylglucosamine transferase	Cytoplasmic Membrane	Cell envelope	Cell division	off UW3114	0.0058019	0.0057226	0.005447	0.00565717	3	off	off	off	off
OG1RF_10731_731	YlmE	YggS family pyridoxal phosphate enzyme	Cytoplasmic	poorly characterized	Cell division	off UW3114	0.028468	0.018719	0.017818	0.0216683		off UW3114	off UW3114	off UW3114	off UW3114
OG1RF_10732_732	OG1RF_10732	hypothetical protein	Unknown	poorly characterized	Function unknown	off UW3114	0.014492		0.0090702	0.0117811	2	off	off	off	off
OG1RF_10737_737	Zwf	glucose-6-phosphate 1-dehydrogenase	Cytoplasmic	Energy metabolism	Function unknown	off UW3114	0.01895	0.014538	0.017792	0.0170933		off UW3114	off UW3114	off UW3114	off UW3114
OG1RF_10738_738	SirR	iron-dependent repressor	Cytoplasmic	information storage and processing	Function unknown	off UW3114	0.0096175	0.0094861	0.0090293	0.00937763		off UW3114	off UW3114	off UW3114	off UW3114
OG1RF_10768_768	OG1RF_10768	lipoprotein	Cytoplasmic Membrane	poorly characterized	Function unknown	off UW3114	0.054115	0.058228	0.046187	0.0528433	3	off	off	off	off
OG1RF_10783_783	OG1RF_10783	response regulator	Cytoplasmic	cellular processes and signaling	Signal transduction mechanisms	off UW3114	0.098326	0.050801	0.021979	0.0570353		off UW3114	off UW3114	off UW3114	off UW3114
OG1RF_10870_870	OG1RF_10870	cell wall surface anchor family protein	Cellwall	Cell envelope	Biosynthesis and degradation of surface polysaccharides and lipopolysaccharides	off UW3114	0.033641	0.033181	0.025267	0.0306963	3	off	off	off	off
OG1RF_10889_889	LepB	signal peptidase I LepB	Cellwall	Protein fate	Function unknown	off UW3114	0.017597	0.017356	0.022028	0.0189937	3	off	off	off	off
OG1RF_10897_897	OG1RF_10897	glutamine ABC superfamily ATP binding cassette transporter, binding protein	Unknown	metabolism	Amino acid transport and metabolism	off UW3114	0.015528		0.014578	0.015053	2	off	off	off	off
OG1RF_10915_915	DkgB	2,5-diketo-D-gluconate reductase	Cytoplasmic	poorly characterized	Function unknown	off UW3114	0.033131	0.036309	0.024192	0.0312107		off UW3114	off UW3114	off UW3114	off UW3114
OG1RF_10919_919	OG1RF_10919	cof family protein	Cytoplasmic	poorly characterized	Enzymes of unknown specificity	off UW3114	0.031631	0.023399	0.025984	0.0270047		off UW3114	off UW3114	off UW3114	off UW3114
OG1RF_10922_922	OG1RF_10922	hypothetical protein	Cytoplasmic	poorly characterized	Function unknown	off UW3114	0.029449	0.021785	0.034561	0.0285983		off UW3114	off UW3114	off UW3114	off UW3114
OG1RF_10924_924	PyrG	CTP synthase	Cytoplasmic	Purines, pyrimidines, nucleosides, and nucleotides	Function unknown	off UW3114		0.0098224	0.0093494	0.0095859		off UW3114	off UW3114	off UW3114	off UW3114
OG1RF_10929_929	OG1RF_10929	site-specific DNA-methyltransferase	Cytoplasmic	DNA metabolism	DNA replication, recombination, and repair	off UW3114		0.0081625	0.010359	0.00926075		off UW3114	off UW3114	off UW3114	off UW3114
OG1RF_10951_951	CscK	fructokinase	Cytoplasmic	information storage and processing	Function unknown	off UW3114		0.0068597	0.0065293	0.0066945		off UW3114	off UW3114	off UW3114	off UW3114
OG1RF_10957_957	OG1RF_10957	metallo-beta-lactamase superfamily protein	Cytoplasmic	Transcription	Degradation of RNA	off UW3114	0.0075982	0.0074944	0.0053501	0.00681423		off UW3114	off UW3114	off UW3114	off UW3114
OG1RF_10965_965	OG1RF_10965	response regulator	Cytoplasmic	cellular processes and signaling	Signal transduction mechanisms	off UW3114	0.031935		0.012849	0.022392		off UW3114	off UW3114	off UW3114	off UW3114
OG1RF_10967_967	OG1RF_10967	hypothetical protein	Unknown	poorly characterized	Function unknown	off UW3114	0.04897	0.041056	0.032182	0.040736	3	off	off	off	off
OG1RF_10971_971	YcgQ	hypothetical protein	Cytoplasmic Membrane	poorly characterized	General function prediction only	off UW3114	0.0074135	0.018281		0.0128472	2	off	off	off	off
OG1RF_10977_977	OG1RF_10977	cro/CI family TPR domain transcriptional regulator	Cytoplasmic	poorly characterized	General function prediction only	off UW3114	0.022714	0.026137		0.0244255		off UW3114	off UW3114	off UW3114	off UW3114
OG1RF_10984_984	OG1RF_10984	transcriptional regulator	Cytoplasmic Membrane	Regulatory functions	Other	off UW3114	0.014093	0.0139	0.0099233	0.0126388	3	off	off	off	off
OG1RF_10985_985	AlsS	acetolactate synthase	Cytoplasmic Membrane	Protein synthesis	Other	off UW3114	0.01941	0.013401	0.016401	0.016404	3	off	off	off	off
OG1RF_10987_987	OG1RF_10987	hypothetical protein	Cytoplasmic Membrane	poorly characterized	Function unknown	off UW3114	0.0059308	0.0058498		0.0058903	2	off	off	off	off
OG1RF_10993_993	OG1RF_10993	spermidine/putrescine ABC superfamily ATP binding cassette transporter	Unknown	metabolism	Amino acid transport and metabolism	off UW3114	0.030157	0.038668	0.033975	0.0342667	3	off	off	off	off
OG1RF_11005_1005	OG1RF_11005	ABC superfamily ATP binding cassette transporter, substrate-binding protein	Unknown	metabolism	Carbohydrate transport and metabolism	off UW3114	0.0080266	0.0059377	0.011304	0.00842277	3	off	off	off	off
OG1RF_11043_1043	InfB	translation initiation factor IF2	Cytoplasmic	Protein synthesis	Function unknown	off UW3114	0.0040133	0.005278	0.0037679	0.00435307		off UW3114	off UW3114	off UW3114	off UW3114
OG1RF_11080_1080	DnaJ	chaperone DnaJ	Cytoplasmic	Protein fate	Function unknown	off UW3114	0.021955	0.0081205	0.0077295	0.0126017		off UW3114	off UW3114	off UW3114	off UW3114
OG1RF_11088_1088	NagA	N-acetylglucosamine-6-phosphate deacetylase	Cytoplasmic	Central intermediary metabolism	Transcription	off UW3114	0.0139		0.01044	0.01217		off UW3114	off UW3114	off UW3114	off UW3114
OG1RF_11092_1092	OG1RF_11092	ABC superfamily ATP binding cassette transporter, membrane protein	Cytoplasmic Membrane	cellular processes and signaling	Defense mechanisms	off UW3114	0.0060587	0.0047807	0.0045505	0.00512997	3	off	off	off	off
OG1RF_11094_1094	OG1RF_11094	SPFH domain/band 7 family protein	Cytoplasmic Membrane	poorly characterized	Function unknown	off UW3114		0.0086132	0.0061488	0.00492067	2	off	off	off	off
OG1RF_11128_1128	TrxB	thioredoxin-disulfide reductase	Cytoplasmic	Energy metabolism	Function unknown	off UW3114	0.045652	0.024246	0.013188	0.0276953		off UW3114	off UW3114	off UW3114	off UW3114
OG1RF_11135_1135	OG1RF_11135	sugar ABC superfamily ATP binding cassette transporter, sugar-binding protein	Unknown	metabolism	Carbohydrate transport and metabolism	off UW3114	0.13858	0.12403	0.11805	0.126887	3	off	off	off	off
OG1RF_11148_1148	DhaK	dihydroxyacetone kinase	Cytoplasmic	metabolism	Function unknown	off UW3114	0.016323	0.0064401	0.00613	0.00963103		off UW3114	off UW3114	off UW3114	off UW3114
OG1RF_11150_1150	OG1RF_11150	hypothetical protein	Unknown	poorly characterized	Function unknown	off UW3114	0.036953	0.048598	0.034693	0.0400813	3	off	off	off	off
OG1RF_11151_1151	OG1RF_11151	hydroxymethylglutaryl-CoA synthase	Cytoplasmic	metabolism	Lipid transport and metabolism	off UW3114	0.0072953	0.0071956	0.0091322	0.00787437		off UW3114	off UW3114	off UW3114	off UW3114
OG1RF_11156_1156	OG1RF_11156	hypothetical protein	Unknown	poorly characterized	Function unknown	off UW3114	0.0085861		0.005374	0.00698005	2	off	off	off	off
OG1RF_11161_1161	OG1RF_11161	DHH family protein	Cytoplasmic	poorly characterized	General function prediction only	off UW3114	0.010103	0.0099649	0.0063234	0.0087971		off UW3114	off UW3114	off UW3114	off UW3114
OG1RF_11168_1168	OG1RF_11168	SAM-dependent methyltransferase	Cytoplasmic	poorly characterized	General function prediction only	off UW3114	0.0082755	0.0081625		0.008219		off UW3114	off UW3114	off UW3114	off UW3114
OG1RF_11203_1203	GdhA	glutamate dehydrogenase	Cytoplasmic	metabolism	Enzymes of unknown specificity	off UW3114	0.023829	0.025854	0.022372	0.0240183		off UW3114	off UW3114	off UW3114	off UW3114
OG1RF_11242_1242	RpoD	RNA polymerase sigma factor rpoD	Cytoplasmic	Transcription	Inorganic ion transport and metabolism	off UW3114	0.014505	0.0085839		0.0115445		off UW3114	off UW3114	off UW3114	off UW3114
OG1RF_11246_1246	Gap	glyceraldehyde-3-phosphate dehydrogenase	Cytoplasmic	Energy metabolism	Function unknown	off UW3114	0.012709	0.0094014	0.011932	0.0113475		off UW3114	off UW3114	off UW3114	off UW3114
OG1RF_11266_1266	Cmk	cytidylate kinase	Cytoplasmic	Purines, pyrimidines, nucleosides, and nucleotides	Function unknown	off UW3114	0.037789	0.0093182	0.026609	0.0245721		off UW3114	off UW3114	off UW3114	off UW3114
OG1RF_11268_1268	EngA	ribosome-associated GTPase EngA	Cytoplasmic Membrane	Protein synthesis	Function unknown	off UW3114	0.004897		0.0068962	0.0058966	2	off	off	off	off
OG1RF_11282_1282	AroB	3-dehydroquinate synthase	Cytoplasmic	Amino acid biosynthesis	Function unknown	off UW3114		0.0058825	0.0055992	0.00574085		off UW3114	off UW3114	off UW3114	off UW3114
OG1RF_11313_1313	OG1RF_11313	putative lipoprotein	Cytoplasmic Membrane	poorly characterized	Function unknown	off UW3114	0.038127	0.018803	0.011932	0.022954	3	off	off	off	off
OG1RF_11354_1354	OG1RF_11354	iron (Fe) ABC superfamily ATP binding cassette transporter, binding protein	Unknown	metabolism	Inorganic ion transport and metabolism	off UW3114	0.015607	0.0092365	0.014653	0.0131655	3	off	off	off	off
OG1RF_11356_1356	OG1RF_11356	aldose epimerase	Cytoplasmic	metabolism	Carbohydrate transport and metabolism	off UW3114	0.02568	0.010855		0.0182675		off UW3114	off UW3114	off UW3114	off UW3114
OG1RF_11357_1357	CodY	GTP-sensing transcriptional pleiotropic repressor CodY	Cytoplasmic	Regulatory functions	Carbohydrate transport and metabolism	off UW3114	0.016424	0.016199		0.0163115		off UW3114	off UW3114	off UW3114	off UW3114
OG1RF_11358_1358	HslU	ATP-dependent hsl protease ATP-binding subunit HslU	Cytoplasmic	Protein fate	Carbohydrate transport and metabolism	off UW3114	0.0091438	0.0090189	0.0085846	0.00891577		off UW3114	off UW3114	off UW3114	off UW3114
OG1RF_11359_1359	HslV	ATP-dependent protease HslVU	Cytoplasmic	Protein fate	Carbohydrate transport and metabolism	off UW3114	0.016508	0.016283	0.010333	0.0143747		off UW3114	off UW3114	off UW3114	off UW3114
OG1RF_11384_1384	OG1RF_11384	permease protein	Cytoplasmic Membrane	Cell envelope	Biosynthesis and degradation of surface polysaccharides and lipopolysaccharides	off UW3114		0.0049319	0.0046944	0.00481315	2	off	off	off	off
OG1RF_11395_1395	OG1RF_11395	hypothetical protein	Unknown	poorly characterized	Function unknown	off UW3114	0.0098391	0.0097047	0.0092374	0.00959373	3	off	off	off	off
OG1RF_11396_1396	OG1RF_11396	GDSL family lipase/acylhydrolase	Unknown	metabolism	Amino acid transport and metabolism	off UW3114	0.032133	0.014086	0.026816	0.024345	3	off	off	off	off
OG1RF_11400_1400	Apt	adenine phosphoribosyltransferase	Cytoplasmic	Purines, pyrimidines, nucleosides, and nucleotides	Function unknown	off UW3114	0.031398	0.018582	0.023582	0.0245207		off UW3114	off UW3114	off UW3114	off UW3114
OG1RF_11405_1405	OG1RF_11405	hypothetical protein	Unknown	poorly characterized	Function unknown	off UW3114	0.017035	0.016803	0.015993	0.0166103	3	off	off	off	off
OG1RF_11417_1417	AspC2	aminotransferase	Cytoplasmic	metabolism	Small molecule interactions	off UW3114	0.00817	0.0080584	0.0051135	0.00711397		off UW3114	off UW3114	off UW3114	off UW3114
OG1RF_11421_1421	OG1RF_11421	LysR family transcriptional regulator	Cytoplasmic	information storage and processing	Transcription	off UW3114	0.0067996		0.0095757	0.00818765		off UW3114	off UW3114	off UW3114	off UW3114
OG1RF_11423_1423	PyrE	orotate phosphoribosyltransferase	Cytoplasmic	Purines, pyrimidines, nucleosides, and nucleotides	Transcription	off UW3114	0.018979	0.0093596	0.0089089	0.0124158		off UW3114	off UW3114	off UW3114	off UW3114
OG1RF_11427_1427	CarB	carbamoyl-phosphate synthase, large subunit	Cytoplasmic	Purines, pyrimidines, nucleosides, and nucleotides	Transcription	off UW3114	0.0020029	0.0069144	0.0065814	0.00516623		off UW3114	off UW3114	off UW3114	off UW3114
OG1RF_11429_1429	PyrC	dihydroorotase	Cytoplasmic	Purines, pyrimidines, nucleosides, and nucleotides	Transcription	off UW3114	0.01	0.0049319	0.0070416	0.0073245		off UW3114	off UW3114	off UW3114	off UW3114
OG1RF_11432_1432	Upp	uracil phosphoribosyltransferase	Cytoplasmic	metabolism	Transcription	off UW3114	0.011995		0.011261	0.011628		off UW3114	off UW3114	off UW3114	off UW3114
OG1RF_11445_1445	Nfo	deoxyribonuclease IV (phage-T(4)-induced)	Cytoplasmic	DNA metabolism	Transcription	off UW3114	0.017972	0.017727	0.016873	0.017524		off UW3114	off UW3114	off UW3114	off UW3114
OG1RF_11449_1449	TyrS2	tyrosine--tRNA ligase	Cytoplasmic	Protein synthesis	Function unknown	off UW3114	0.038127	0.030085	0.02625	0.0314873		off UW3114	off UW3114	off UW3114	off UW3114
OG1RF_11454_1454	PepQ2	xaa-Pro dipeptidase	Cytoplasmic	metabolism	General function prediction only	off UW3114	0.011635	0.011476	0.0081928	0.0104346		off UW3114	off UW3114	off UW3114	off UW3114
OG1RF_11456_1456	OG1RF_11456	methyl-accepting chemotaxis family protein	Unknown	poorly characterized	General function prediction only	off UW3114	0.019528	0.012841	0.018334	0.016901	3	off	off	off	off
OG1RF_11464_1464	OG1RF_11464	hypothetical protein	Cytoplasmic	poorly characterized	Function unknown	off UW3114	0.011418	0.011262	0.0089328	0.0105376		off UW3114	off UW3114	off UW3114	off UW3114
OG1RF_11465_1465	PhoU	phosphate transport system regulatory protein PhoU	Cytoplasmic	Regulatory functions	Function unknown	off UW3114		0.014039	0.017818	0.0159285		off UW3114	off UW3114	off UW3114	off UW3114
OG1RF_11467_1467	PstB2	ABC superfamily ATP binding cassette transporter, ABC protein	Cytoplasmic Membrane	Transport and binding proteins	Function unknown	off UW3114	0.0079371	0.0078287	0.0074517	0.00773917	3	off	off	off	off
OG1RF_11530_1530	AmiD4	N-acetylmuramoyl-L-alanine amidase	Extracellular	Cell envelope	General function prediction only	off UW3114	0.070731	0.058408	0.066405	0.0651813	3	off	off	off	off
OG1RF_11531_1531	OG1RF_11531	glycosyl hydrolase	Unknown	metabolism	Carbohydrate transport and metabolism	off UW3114	0.028468	0.02864	0.030469	0.0291923	3	off	off	off	off
OG1RF_11573_1573	MurC	UDP-N-acetylmuramate--L-alanine ligase	Cytoplasmic	Cell envelope	Lipid transport and metabolism	off UW3114	0.0046822	0.0069274	0.0043959	0.00533517		off UW3114	off UW3114	off UW3114	off UW3114
OG1RF_11581_1581	ClpX	ATP-dependent Clp protease ATP-binding subunit	Cytoplasmic	Protein fate	Function unknown	off UW3114	0.0076802	0.0050502	0.0072105	0.00664697		off UW3114	off UW3114	off UW3114	off UW3114
OG1RF_11582_1582	OG1RF_11582	6-phosphogluconolactonase	Cytoplasmic	metabolism	Carbohydrate transport and metabolism	off UW3114	0.024194	0.014914	0.014196	0.017768		off UW3114	off UW3114	off UW3114	off UW3114
OG1RF_11607_1607	OG1RF_11607	membrane-oligosaccharide glycerophosphotransferase	Cytoplasmic Membrane	Cell envelope	Biosynthesis and degradation of surface polysaccharides and lipopolysaccharides	off UW3114	0.0052416	0.00517	0.0049211	0.0051109	3	off	off	off	off
OG1RF_11632_1632	AspS	aspartate--tRNA ligase	Cytoplasmic	Protein synthesis	Coenzyme transport and metabolism	off UW3114	0.0036249		0.0051049	0.0043649		off UW3114	off UW3114	off UW3114	off UW3114
OG1RF_11633_1633	HisS	histidine--tRNA ligase	Cytoplasmic	Protein synthesis	Coenzyme transport and metabolism	off UW3114	0.0073964	0.0048636	0.006944	0.00640133		off UW3114	off UW3114	off UW3114	off UW3114
OG1RF_11660_1660	Ndh2	NADH dehydrogenase	Cytoplasmic Membrane	metabolism	Cell division	off UW3114	0.013245	0.010451		0.011848	2	off	off	off	off
OG1RF_11682_1682	OG1RF_11682	ABC superfamily ATP binding cassette transporter, binding protein	Cytoplasmic Membrane	metabolism	Inorganic ion transport and metabolism	off UW3114	0.011562	0.0076026		0.0095823	2	off	off	off	off
OG1RF_11701_1701	GlnA	glutamate--ammonia ligase	Cytoplasmic	Amino acid biosynthesis	Function unknown	off UW3114	0.047341	0.042025	0.035557	0.041641		off UW3114	off UW3114	off UW3114	off UW3114
OG1RF_11718_1718	OG1RF_11718	hypothetical protein	Unknown	Cell envelope	Biosynthesis and degradation of surface polysaccharides and lipopolysaccharides	off UW3114	0.019576	0.025745	0.041659	0.0289933	3	off	off	off	off
OG1RF_11725_1725	OG1RF_11725	group 2 glycosyl transferase	Cytoplasmic Membrane	Cell envelope	Biosynthesis and degradation of surface polysaccharides and lipopolysaccharides	off UW3114	0.0040785	0.0090512	0.0057436	0.0062911	3	off	off	off	off
OG1RF_11731_1731	RfbD	dTDP-4-dehydrorhamnose reductase	Cytoplasmic	Cell envelope	Biosynthesis and degradation of surface polysaccharides and lipopolysaccharides	off UW3114	0.042845	0.028173	0.036872	0.0359633		off UW3114	off UW3114	off UW3114	off UW3114
OG1RF_11740_1740	Map2	M24 family methionyl aminopeptidase	Cytoplasmic	Protein fate	General function prediction only	off UW3114	0.0084059	0.012437		0.0104214		off UW3114	off UW3114	off UW3114	off UW3114
OG1RF_11743_1743	OG1RF_11743	TetR family transcriptional regulator	Cytoplasmic	information storage and processing	Transcription	off UW3114	0.011237		0.01055	0.0108935		off UW3114	off UW3114	off UW3114	off UW3114
OG1RF_11751_1751	OG1RF_11751	hypothetical protein	Unknown	poorly characterized	Conserved	off UW3114	0.027373	0.035999	0.017133	0.026835	3	off	off	off	off
OG1RF_11759_1759	OG1RF_11759	sensor histidine kinase	Cytoplasmic Membrane	cellular processes and signaling	Signal transduction mechanisms	off UW3114		0.0036561	0.0034801	0.00237873	2	off	off	off	off
OG1RF_11764_1764	OG1RF_11764	cell wall surface anchor family protein	Cellwall	poorly characterized	General function prediction only	off UW3114	0.0022498	0.0038834	0.0047525	0.00362857	3	off	off	off	off
OG1RF_11774_1774	OG1RF_11774	sugar ABC superfamily ATP binding cassette transporter, sugar-binding protein	Cytoplasmic Membrane	metabolism	Carbohydrate transport and metabolism	off UW3114	0.035166	0.01982	0.014149	0.023045	3	off	off	off	off
OG1RF_11795_1795	PurB	adenylosuccinate lyase	Cytoplasmic	Purines, pyrimidines, nucleosides, and nucleotides	Function unknown	off UW3114	0.0099076	0.012215	0.013953	0.0120252		off UW3114	off UW3114	off UW3114	off UW3114
OG1RF_11798_1798	Xpt	xanthine phosphoribosyltransferase	Cytoplasmic	Purines, pyrimidines, nucleosides, and nucleotides	Function unknown	off UW3114	0.044251	0.027279	0.031158	0.0342293		off UW3114	off UW3114	off UW3114	off UW3114
OG1RF_11800_1800	OG1RF_11800	family 4 N-acetylmuramoyl-L-alanine amidase	Extracellular	Cell envelope	Surface structures	off UW3114	0.015036	0.019774	0.032938	0.0225827	3	off	off	off	off
OG1RF_11802_1802	OG1RF_11802	hypothetical protein	Cytoplasmic	poorly characterized	Function unknown	off UW3114	0.042947		0.01728	0.0301135		off UW3114	off UW3114	off UW3114	off UW3114
OG1RF_11805_1805	AsnS	asparagine--tRNA ligase	Cytoplasmic	Protein synthesis	General function prediction only	off UW3114	0.0047446	0.0046798	0.0066817	0.0053687		off UW3114	off UW3114	off UW3114	off UW3114
OG1RF_11818_1818	ProS	proline--tRNA ligase	Cytoplasmic	Protein synthesis	Function unknown	off UW3114	0.029861	0.031294	0.019274	0.0268097		off UW3114	off UW3114	off UW3114	off UW3114
OG1RF_11825_1825	SufB	ABC superfamily ATP binding cassette transporter, membrane protein	Cytoplasmic	Biosynthesis of cofactors, prosthetic groups, and carriers	Function unknown	off UW3114	0.018406	0.013616	0.01296	0.014994		off UW3114	off UW3114	off UW3114	off UW3114
OG1RF_11839_1839	GlyS	glycyl-tRNA synthetase beta subunit	Cytoplasmic	Protein synthesis	Function unknown	off UW3114	0.0030765	0.0030345	0.0028883	0.00299977		off UW3114	off UW3114	off UW3114	off UW3114
OG1RF_11840_1840	GlyQ	glycyl-tRNA synthetase alpha subunit	Cytoplasmic	Protein synthesis	Function unknown	off UW3114	0.013643	0.020185	0.025617	0.019815		off UW3114	off UW3114	off UW3114	off UW3114
OG1RF_11852_1852	ThrC	threonine synthase	Cytoplasmic	Amino acid biosynthesis	Function unknown	off UW3114	0.018249	0.023999	0.025699	0.022649		off UW3114	off UW3114	off UW3114	off UW3114
OG1RF_11855_1855	OG1RF_11855	putative pyrroline-5-carboxylate reductase	Cytoplasmic	Amino acid biosynthesis	Glutamate family	off UW3114	0.0082119		0.0077097	0.0079608		off UW3114	off UW3114	off UW3114	off UW3114
OG1RF_11856_1856	PgcA	bifunctional phosphoglucomutase/phosphomannomutase	Cytoplasmic	metabolism	Glutamate family	off UW3114	0.043426	0.042832	0.042468	0.0429087		off UW3114	off UW3114	off UW3114	off UW3114
OG1RF_11882_1882	OG1RF_11882	PDZ domain protein	Unknown	cellular processes and signaling	Signal transduction mechanisms	off UW3114	0.0089962	0.0088733	0.0056306	0.00783337	3	off	off	off	off
OG1RF_11888_1888	PycA	pyruvate carboxylase	Cytoplasmic	Energy metabolism	Function unknown	off UW3114		0.0027421	0.00261	0.00267605		off UW3114	off UW3114	off UW3114	off UW3114
OG1RF_11902_1902	ArgS	arginine--tRNA ligase	Cytoplasmic	Protein synthesis	General function prediction only	off UW3114	0.017066	0.018703	0.016022	0.0172637		off UW3114	off UW3114	off UW3114	off UW3114
OG1RF_11908_1908	OG1RF_11908	hypothetical protein	Cytoplasmic	poorly characterized	Function unknown	off UW3114	0.010415	0.020546	0.014667	0.0152093		off UW3114	off UW3114	off UW3114	off UW3114
OG1RF_11916_1916	MetQ	ABC superfamily ATP binding cassette transporter, binding protein	Cytoplasmic Membrane	metabolism	General function prediction only	off UW3114	0.035323	0.027098	0.025793	0.0294047	3	off	off	off	off
OG1RF_11935_1935	PrfA	peptide chain release factor RF1	Cytoplasmic	Protein synthesis	tRNA and rRNA base modification	off UW3114	0.032894	0.020646	0.016845	0.0234617		off UW3114	off UW3114	off UW3114	off UW3114
OG1RF_11968_1968	Pmi	mannose-6-phosphate isomerase	Cytoplasmic	Energy metabolism	Function unknown	off UW3114	0.023136	0.01956	0.0093089	0.017335		off UW3114	off UW3114	off UW3114	off UW3114
OG1RF_11970_1970	OG1RF_11970	glyoxalase	Cytoplasmic	poorly characterized	General function prediction only	off UW3114	0.048021	0.032791	0.027744	0.0361853		off UW3114	off UW3114	off UW3114	off UW3114
OG1RF_11985_1985	AtpC2	ATP synthase F1 sector epsilon subunit	Cytoplasmic	Energy metabolism	Function unknown	off UW3114		0.01515	0.014421	0.0147855		off UW3114	off UW3114	off UW3114	off UW3114
OG1RF_12001_2001	OG1RF_12001	nicotinate phosphoribosyltransferase	Cytoplasmic	Biosynthesis of cofactors, prosthetic groups, and carriers	Pyridine nucleotides	off UW3114	0.010805	0.01492	0.014202	0.013309		off UW3114	off UW3114	off UW3114	off UW3114
OG1RF_12044_2044	PepF	oligoendopeptidase F	Cytoplasmic	Protein fate	Secondary metabolites biosynthesis, transport and catabolism	off UW3114	0.026556	0.024447	0.013297	0.0214333		off UW3114	off UW3114	off UW3114	off UW3114
OG1RF_12046_2046	MecA	adapter protein MecA	Cytoplasmic	cellular processes and signaling	General function prediction only	off UW3114	0.0097049	0.0095724	0.0091114	0.0094629		off UW3114	off UW3114	off UW3114	off UW3114
OG1RF_12052_2052	OG1RF_12052	WxL domain surface protein	Unknown	poorly characterized	General function prediction only	off UW3114	0.045515	0.016325	0.015539	0.025793	3	off	off	off	off
OG1RF_12055_2055	OG1RF_12055	cell surface protein	Cellwall	poorly characterized	Function unknown	off UW3114	0.0029531		0.0027725	0.0028628	2	off	off	off	off
OG1RF_12063_2063	MtnN	MTA/SAH nucleosidase	Cytoplasmic	Central intermediary metabolism	General function prediction only	off UW3114	0.036971	0.031908	0.052065	0.0403147		off UW3114	off UW3114	off UW3114	off UW3114
OG1RF_12067_2067	OG1RF_12067	tellurite resistance protein	Cytoplasmic	metabolism	Inorganic ion transport and metabolism	off UW3114	0.0081079	0.0053314	0.0076121	0.00701713		off UW3114	off UW3114	off UW3114	off UW3114
OG1RF_12071_2071	OG1RF_12071	transcriptional regulator	Cytoplasmic Membrane	Regulatory functions	Other	off UW3114	0.0057088		0.0053597	0.00553425	2	off	off	off	off
OG1RF_12091_2091	OG1RF_12091	alpha/beta hydrolase	Cytoplasmic Membrane	poorly characterized	General function prediction only	off UW3114	0.018094	0.028555	0.02718	0.0246097	3	off	off	off	off
OG1RF_12092_2092	NusG	transcription termination/antitermination factor NusG	Cytoplasmic	Transcription	General function prediction only	off UW3114	0.041286	0.02327	0.038761	0.034439		off UW3114	off UW3114	off UW3114	off UW3114
OG1RF_12097_2097	MurB	UDP-N-acetylmuramate dehydrogenase	Cytoplasmic	Cell envelope	Function unknown	off UW3114	0.014475	0.017847	0.01359	0.015304		off UW3114	off UW3114	off UW3114	off UW3114
OG1RF_12102_2102	TrxB2	thioredoxin-disulfide reductase	Cytoplasmic	cellular processes and signaling	Function unknown	off UW3114	0.016709	0.021975	0.019174	0.019286		off UW3114	off UW3114	off UW3114	off UW3114
OG1RF_12106_2106	OG1RF_12106	metallo-beta-lactamase	Cytoplasmic	poorly characterized	General function prediction only	off UW3114	0.0082119	0.0080997		0.0081558		off UW3114	off UW3114	off UW3114	off UW3114
OG1RF_12108_2108	CelM	M42 family glutamyl aminopeptidase	Cytoplasmic Membrane	metabolism	Function unknown	off UW3114	0.014827	0.0058498		0.0103384	2	off	off	off	off
OG1RF_12112_2112	DltA	D-alanine--D-alanyl carrier protein ligase subunit 1	Cytoplasmic	Cell envelope	Function unknown	off UW3114	0.0063293	0.0062428		0.00628605		off UW3114	off UW3114	off UW3114	off UW3114
OG1RF_12142_2142	GalE4	UDP-glucose 4-epimerase	Cytoplasmic	Energy metabolism	Carbohydrate transport and metabolism	off UW3114	0.02588	0.025526	0.024297	0.0252343		off UW3114	off UW3114	off UW3114	off UW3114
OG1RF_12159_2159	ThrS	threonine--tRNA ligase	Cytoplasmic	Protein synthesis	Function unknown	off UW3114	0.0048525	0.0063816		0.00561705		off UW3114	off UW3114	off UW3114	off UW3114
OG1RF_12168_2168	OG1RF_12168	PFL4705 family integrating conjugative element protein	Cytoplasmic Membrane	Cell envelope	Biosynthesis and degradation of surface polysaccharides and lipopolysaccharides	off UW3114	0.0077358	0.011445	0.010894	0.0100249	3	off	off	off	off
OG1RF_12179_2179	AccD	acetyl-coA carboxylase carboxyl transferase subunit beta	Cytoplasmic	Fatty acid and phospholipid metabolism	General	off UW3114	0.014827	0.0073122		0.0110696		off UW3114	off UW3114	off UW3114	off UW3114
OG1RF_12181_2181	FabZ2	(3R)-hydroxymyristoyl-[acyl-carrier-protein] dehydratase	Cytoplasmic	Fatty acid and phospholipid metabolism	General	off UW3114	0.045427	0.059742	0.042649	0.0492727		off UW3114	off UW3114	off UW3114	off UW3114
OG1RF_12183_2183	FabF2	beta-ketoacyl-acyl-carrier-protein synthase II	Cytoplasmic Membrane	Fatty acid and phospholipid metabolism	General	off UW3114	0.023377	0.017934	0.0073157	0.0162089	3	off	off	off	off
OG1RF_12215_2215	PabC	aminodeoxychorismate lyase	Unknown	poorly characterized	Function unknown	off UW3114	0.071787	0.075375	0.071745	0.072969	3	off	off	off	off
OG1RF_12224_2224	OG1RF_12224	metallo-beta-lactamase superfamily protein	Cytoplasmic	Transcription	Degradation of RNA	off UW3114	0.0076117		0.0035731	0.0055924		off UW3114	off UW3114	off UW3114	off UW3114
OG1RF_12264_2264	OG1RF_12264	phosphoglycerate mutase	Cytoplasmic	metabolism	Carbohydrate transport and metabolism	off UW3114	0.018301		0.011454	0.0148775		off UW3114	off UW3114	off UW3114	off UW3114
OG1RF_12267_2267	OG1RF_12267	permease protein	Cytoplasmic Membrane	cellular processes and signaling	Pentose phosphate pathway	off UW3114	0.0079667	0.0052386		0.00660265	2	off	off	off	off
OG1RF_12269_2269	OG1RF_12269	PFL4705 family integrating conjugative element protein	Unknown	Cell envelope	Pentose phosphate pathway	off UW3114	0.035768	0.043421	0.030998	0.036729	3	off	off	off	off
OG1RF_12283_2283	OG1RF_12283	putative lipoprotein	Unknown	poorly characterized	Pentose phosphate pathway	off UW3114		0.0091562	0.017431	0.0132936	2	off	off	off	off
OG1RF_12303_2303	OG1RF_12303	family 8 polysaccharide lyase	Cellwall	Cell envelope	Pentose phosphate pathway	off UW3114	0.018167	0.019626	0.025178	0.0209903	3	off	off	off	off
OG1RF_12310_2310	OG1RF_12310	peptidase propeptide and YPEB domain protein	Cytoplasmic Membrane	poorly characterized	Pentose phosphate pathway	off UW3114	0.016053	0.015834	0.015072	0.015653	3	off	off	off	off
OG1RF_12322_2322	OG1RF_12322	hypothetical protein	Unknown	poorly characterized	Pentose phosphate pathway	off UW3114	0.062066	0.069381	0.050501	0.0606493	3	off	off	off	off
OG1RF_12334_2334	Pnp	polyribonucleotide nucleotidyltransferase	Cytoplasmic	Transcription	Pentose phosphate pathway	off UW3114	0.047008	0.043375	0.039862	0.043415		off UW3114	off UW3114	off UW3114	off UW3114
OG1RF_12362_2362	FtsY	cell division protein FtsY	Cytoplasmic Membrane	Protein fate	Pentose phosphate pathway	off UW3114	0.0048305		0.0045351	0.0046828	2	off	off	off	off
OG1RF_12364_2364	Smc	cell division protein Smc	Cytoplasmic	Cellular processes	Pentose phosphate pathway	off UW3114		0.0053001	0.0042041	0.0047521		off UW3114	off UW3114	off UW3114	off UW3114
OG1RF_12384_2384	OG1RF_12384	non-specific serine/threonine protein kinase	Cytoplasmic Membrane	poorly characterized	Pentose phosphate pathway	off UW3114	0.008921	0.0073326	0.016751	0.0110015	3	off	off	off	off
OG1RF_12387_2387	Fmt	methionyl-tRNA formyltransferase	Cytoplasmic	Protein synthesis	Pentose phosphate pathway	off UW3114	0.013643	0.0067282	0.0064042	0.00892513		off UW3114	off UW3114	off UW3114	off UW3114
OG1RF_12391_2391	Gmk2	guanylate kinase	Cytoplasmic	Purines, pyrimidines, nucleosides, and nucleotides	Pentose phosphate pathway	off UW3114	0.015699		0.009826	0.0127625		off UW3114	off UW3114	off UW3114	off UW3114
OG1RF_12419_2419	YueF	peptidase M16 inactive domain protein	Cytoplasmic	poorly characterized	Pentose phosphate pathway	off UW3114	0.0075892	0.0099807	0.007125	0.00823163		off UW3114	off UW3114	off UW3114	off UW3114
OG1RF_12420_2420	MscL	large conductance mechanosensitive channel protein	Cytoplasmic Membrane	Cellular processes	Pentose phosphate pathway	off UW3114	0.042988	0.056535	0.053812	0.0511117	3	off	off	off	off
OG1RF_12425_2425	TrePP	glycosyl hydrolase	Cytoplasmic Membrane	metabolism	Pentose phosphate pathway	off UW3114	0.0093439	0.012672	0.010966	0.010994	3	off	off	off	off
OG1RF_12456_2456	OG1RF_12456	WxL domain surface protein	Cellwall	metabolism	Pentose phosphate pathway	off UW3114	0.0052783	0.0071586	0.0092916	0.00724283	3	off	off	off	off
OG1RF_12499_2499	OG1RF_12499	chitin binding protein	Unknown	poorly characterized	Pentose phosphate pathway	off UW3114	0.02749	0.027115	0.043015	0.03254	3	off	off	off	off
OG1RF_12502_2502	OG1RF_12502	hypothetical protein	Unknown	poorly characterized	Pentose phosphate pathway	off UW3114	0.003415	0.002021	0.0038474	0.00309447	3	off	off	off	off
OG1RF_12508_2508	OG1RF_12508	thiamine biosynthesis lipoprotein	Unknown	metabolism	Pentose phosphate pathway	off UW3114	0.0090215	0.01483	0.011293	0.0117148	3	off	off	off	off
OG1RF_12537_2537	SerS2	serine--tRNA ligase	Cytoplasmic	Protein synthesis	Pentose phosphate pathway		0.017666	0.019914	0.023694	0.0204247		off UW3114	off UW3114	off UW3114	off UW3114	off UW3114
OG1RF_12541_2541	YchF	GTP-binding protein YchF	Cytoplasmic	poorly characterized	Pentose phosphate pathway			0.0056763	0.005403	0.00553965		off UW3114	off UW3114	off UW3114	off UW3114	off UW3114
